# Supplementary material for: Enantioselective iridium catalyzed α-alkylation of azlactones by a tandem asymmetric allylic alkylation/aza-Cope rearrangement
Source: Royal Society of Chemistry journal article supplement (doi:10.1039/c9cc01450k), 2019-01-01
Supplement: c9cc01450k1.pdf [file c9cc01450k1.pdf]

# Enantioselective iridium catalyzed $\alpha$ -alkylation of azlactones by a tandem asymmetric allylic alkylation/aza-Cope rearrangement

Xue-Dan Bai, Qing-Feng Zhang, and Ying He\*

School of Chemical Engineering, Nanjing University of Science & Technology,  
Nanjing, 210094, China

## Supporting Information

|                                                                                                     |     |
|-----------------------------------------------------------------------------------------------------|-----|
| General Information .....                                                                           | S2  |
| General procedure A: The synthesis of allylic <i>tert</i> -butyl carbonates .....                   | S2  |
| General procedure B: The synthesis of racemic azlactones .....                                      | S4  |
| General procedure C: Enantioselective $\alpha$ -alkylation of oxazolones by iridium catalysis ..... | S6  |
| General procedure D: One-pot synthesis of allylated 2,4-diaryloxazol-5(2 <i>H</i> )-ones .....      | S23 |
| General procedure E: Large scale synthesis of <b>3a</b> .....                                       | S24 |
| Synthetic transformations. ....                                                                     | S24 |
| References .....                                                                                    | S32 |
| Single X-ray structure data of chiral <b>3j</b> .....                                               | S33 |
| Spectral Data .....                                                                                 | S39 |
| HPLC data .....                                                                                     | S91 |

## General Information

Unless otherwise noted, all starting materials were purchased from commercial sources and used without any further purification. The reactions were carried out in the glovebox unless otherwise stated. Toluene, 1,4-dioxane, DCM, and DME were obtained from commercial sources and anhydrous THF is gained from distilling apparatus. Chemicals were used as obtained from the suppliers. The analytical data for the known compounds were found to match with the literature data and stored at  $-30^{\circ}\text{C}$  under an inert atmosphere. TLC plates were visualized under UV light (254 nm) or by staining with phosphomolybdic acid or  $\text{KMnO}_4$  followed by heating. Abbreviations are reported as follows: EA = ethyl acetate, DCM = dichloromethane, DME = dimethoxyethane, THF = tetrahydrofuran, PE = petroleum ether.  $^1\text{H}$  NMR,  $^{19}\text{F}$  NMR and  $^{13}\text{C}$  NMR spectra were recorded on an AVANCE 500 Bruker spectrometer operating at 500 MHz, 470 MHz and 126 MHz in  $\text{CDCl}_3$ , respectively, and chemical shifts are reported in ppm. Multiplicities are reported using the following abbreviations: s = singlet, d = doublet, t = triplet, q = quartet, m = multiplet. High resolution mass spectral data were acquired on Agilent Technologies Accurate-Mass Q-TQF LC/MS 6520 operated by China Pharmaceutical University. Enantiomeric excess was determined on a Thermo Fisher UltiMate 3000 Chiral HPLC using AD, IG, IA column.

### General procedure A: The synthesis of allylic *tert*-butyl carbonates<sup>[1]</sup>

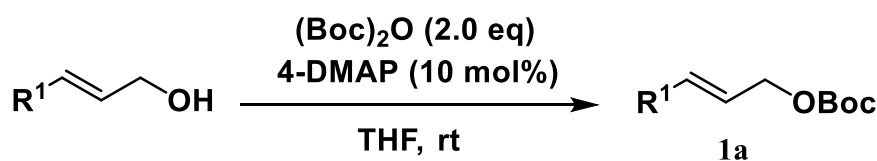

Under an argon atmosphere, to a flame-dried flask containing cinnamyl alcohol derivatives (10 mmol) and  $(\text{Boc})_2\text{O}$  (4.6 mL, 20 mmol) was added 30 mL of anhydrous THF followed by 4-DMAP (122 mg, 1.0 mmol). The resulting solution was stirred at room temperature overnight. The solution was then concentrated in vacuo. The crude products were purified by column chromatography over silica gel (PE: EA=10:1) to afford the title compounds. The characterizations of unreported

substrates are as following:

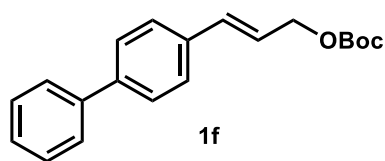

White solid.  $^1\text{H}$  NMR (500 MHz, Chloroform-*d*)  $\delta$  7.62 – 7.57 (m, 4H), 7.49 – 7.43 (m, 4H), 7.37 – 7.34 (m, 1H), 6.72 (d,  $J = 15.9$  Hz, 1H), 6.36 (dtd,  $J = 15.8, 6.5, 1.9$  Hz, 1H), 4.76 (dd,  $J = 6.4, 1.5$  Hz, 2H), 1.53 (d,  $J = 2.1$  Hz, 9H).  $^{13}\text{C}$  NMR (126 MHz, Chloroform-*d*)  $\delta$  152.37, 139.83, 139.56, 134.22, 132.97, 127.81, 126.41, 126.28, 126.11, 125.95, 121.96, 81.26, 66.51, 26.82.

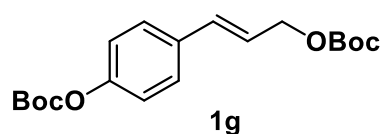

White solid.  $^1\text{H}$  NMR (500 MHz, Chloroform-*d*)  $\delta$  7.39 – 7.37 (m, 2H), 7.13 – 7.12 (m, 2H), 6.64 (d,  $J = 15.9$  Hz, 1H), 6.24 (dt,  $J = 15.9, 6.4$  Hz, 1H), 4.70 (dd,  $J = 6.5, 1.3$  Hz, 2H), 1.55 (s, 9H), 1.50 (s, 9H).  $^{13}\text{C}$  NMR (126 MHz, Chloroform-*d*)  $\delta$  152.30, 150.71, 149.76, 132.87, 132.34, 126.56, 122.11, 120.39, 82.65, 81.28, 66.33, 26.78, 26.68.

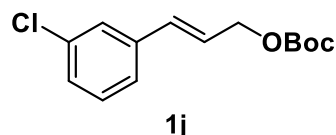

Colorless oil.  $^1\text{H}$  NMR (500 MHz, Chloroform-*d*)  $\delta$  7.37 (d,  $J = 1.6$  Hz, 1H), 7.25 – 7.22 (m, 3H), 6.60 (dd,  $J = 15.9, 1.4$  Hz, 1H), 6.30 (dt,  $J = 15.9, 6.3$  Hz, 1H), 4.71 (dd,  $J = 6.3, 1.4$  Hz, 2H), 1.50 (s, 9H).  $^{13}\text{C}$  NMR (126 MHz, Chloroform-*d*)  $\delta$  152.26, 137.05, 133.54, 131.69, 128.81, 126.99, 125.57, 123.80, 123.52, 81.38, 66.02, 26.77.

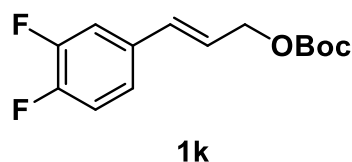

Colorless oil.  $^1\text{H}$  NMR (500 MHz, Chloroform-*d*)  $\delta$  7.19 (ddd,  $J = 11.6, 7.7, 1.7$  Hz, 1H), 7.13 – 7.07 (m, 2H), 6.57 (d,  $J = 15.8$  Hz, 1H), 6.21 (dt,  $J = 16.0, 6.3$  Hz, 1H), 4.70 (dd,  $J = 6.3, 1.4$  Hz, 2H), 1.50 (s, 9H).  $^{13}\text{C}$  NMR (126 MHz, Chloroform-*d*)  $\delta$  152.24, 131.05 (d,  $J = 1.7$  Hz), 123.12 (d,

$J = 2.6$  Hz), 121.91 (d,  $J = 3.4$  Hz), 121.86 (d,  $J = 3.6$  Hz), 116.42, 116.28, 114.04, 113.90, 81.41, 65.91, 26.75.  $^{19}\text{F}$  NMR (470 MHz, Chloroform-*d*)  $\delta$  -137.68 (ddt,  $J = 21.5, 17.1, 7.5$  Hz), -138.20 – -138.30 (m).

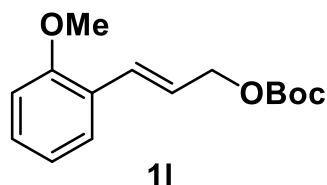

Yellow oil.  $^1\text{H}$  NMR (500 MHz, Chloroform-*d*)  $\delta$  7.41 (dd,  $J = 7.6, 1.6$  Hz, 1H), 7.26 – 7.21 (m, 1H), 6.98 (d,  $J = 16.0$  Hz, 1H), 6.92 – 6.89 (m, 1H), 6.85 (d,  $J = 8.3$  Hz, 1H), 6.31 (dt,  $J = 16.0, 6.6$  Hz, 1H), 4.71 (dd,  $J = 6.6, 1.3$  Hz, 2H), 3.83 (s, 3H), 1.49 (s, 9H).  $^{13}\text{C}$  NMR (126 MHz, Chloroform-*d*)  $\delta$  155.89, 152.38, 145.73, 128.55, 128.13, 126.19, 122.46, 119.60, 109.82, 84.16, 67.09, 54.40, 26.40.

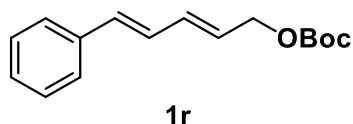

White solid.  $^1\text{H}$  NMR (500 MHz, Chloroform-*d*)  $\delta$  7.44 – 7.40 (m, 2H), 7.32 (t,  $J = 7.6$  Hz, 2H), 7.27 – 7.22 (m, 1H), 6.78 (dd,  $J = 15.6, 10.5$  Hz, 1H), 6.59 (d,  $J = 15.7$  Hz, 1H), 6.47 (dd,  $J = 15.2, 10.5$  Hz, 1H), 5.89 (dt,  $J = 15.0, 6.5$  Hz, 1H), 4.65 (dd,  $J = 6.6, 1.2$  Hz, 2H), 1.51 (s, 9H).  $^{13}\text{C}$  NMR (126 MHz, Chloroform-*d*)  $\delta$  152.35, 135.89, 133.79, 132.89, 127.64, 126.84, 126.69, 125.58, 125.51, 81.18, 66.19, 26.80.

### General procedure B: The synthesis of racemic azlactones<sup>[2]</sup>

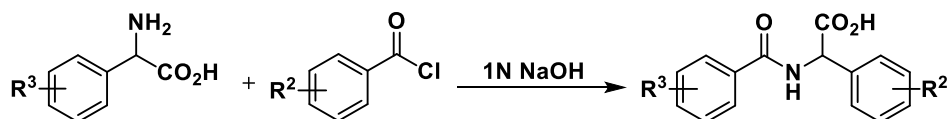

Arylglycine (10 mmol) was dissolved in 1N NaOH (30 mL). Then aroyl chloride (11 mmol) was added dropwise into the solution. After the addition was completed, the reaction mixture was allowed to stir at room temperature overnight, quenched with 2N HCl (20 mL\*2) and extracted by using EA (30 mL\*3). The organic layer was then dried over  $\text{Na}_2\text{SO}_4$  and concentrated in vacuo to yield a white solid. The products were used in the next step without further purification.

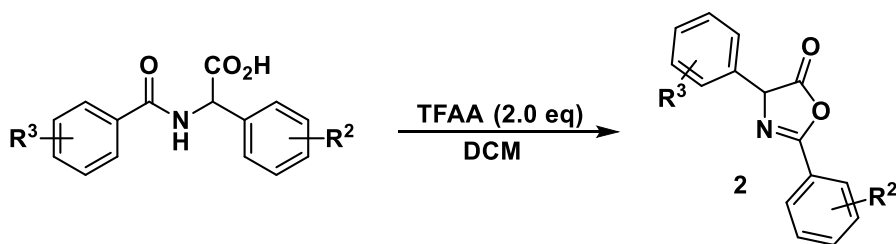

To a flame-dried flask was added the N-benzoyl-phenylglycine (1.27 g, 5 mmol) dissolved in DCM (20 mL). Then TFAA (0.7 mL, 5 mmol) was added and reaction mixture was allowed to stir under nitrogen at room temperature for a certain time. The reaction mixture was quenched with saturated NaHCO<sub>3</sub> solution (25 mL x 3). The product was then extracted using DCM, dried over Na<sub>2</sub>SO<sub>4</sub> and concentrated in vacuo to yield the oxazolones. PS: The oxazolones could be purified by washing with hexane to some extent. The compounds **2w**, **2x**, **2y** and **2a'** were used directly without purification. The characterizations of unreported substrates are as following:

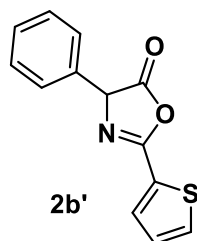

Yellow solid. <sup>1</sup>H NMR (500 MHz, Chloroform-*d*) δ 7.81 (dd, *J* = 3.8, 1.2 Hz, 1H), 7.65 (dd, *J* = 5.1, 1.3 Hz, 1H), 7.45 – 7.36 (m, 5H), 7.19 (dd, *J* = 5.1, 3.8 Hz, 1H), 5.50 (s, 1H). <sup>13</sup>C NMR (126 MHz, Chloroform-*d*) δ 174.64, 157.42, 132.35, 131.44, 131.27, 128.01, 127.78, 127.20, 127.16, 125.85, 66.95. HRMS(ESI) *m/z*: calculated for [C<sub>13</sub>H<sub>9</sub>NO<sub>2</sub>S + H]<sup>+</sup> 244.0432, found 244.0425.

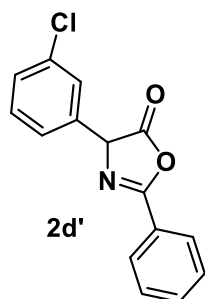

Yellow solid. <sup>1</sup>H NMR (500 MHz, Chloroform-*d*) δ 8.10 (d, *J* = 7.7 Hz, 2H), 7.63 (t, *J* = 7.4 Hz, 1H), 7.54 (t, *J* = 7.7 Hz, 2H), 7.46 (s, 1H), 7.42 – 7.33 (m, 3H), 5.50 (s, 1H). <sup>13</sup>C NMR (126 MHz, Chloroform-*d*) δ 174.61, 161.95, 134.21, 133.92, 132.28,

129.95, 127.93, 127.19, 125.92, 124.43, 124.00, 66.33. HRMS(ESI)  $m/z$ : calculated for  $[C_{15}H_{10}ClNO_2 + H]^+$  272.0478, found 272.0479.

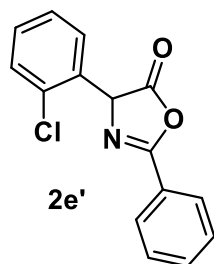

Yellow solid.  $^1H$  NMR (500 MHz, Chloroform- $d$ )  $\delta$  8.09 (d,  $J = 7.7$  Hz, 2H), 7.62 (t,  $J = 7.5$  Hz, 1H), 7.53 (t,  $J = 7.7$  Hz, 2H), 7.47 (d,  $J = 7.9$  Hz, 1H), 7.34 (td,  $J = 7.6, 1.9$  Hz, 1H), 7.30 – 7.24 (m, 2H), 5.89 (s, 1H).  $^{13}C$  NMR (126 MHz, Chloroform- $d$ )  $\delta$  174.22, 162.28, 133.09, 132.19, 130.46, 129.47, 129.36, 128.68, 127.92, 127.14, 126.40, 124.53, 66.07. HRMS(ESI)  $m/z$ : calculated for  $[C_{15}H_{10}ClNO_2 + H]^+$  272.0478, found 272.0473.

### General procedure C: Enantioselective $\alpha$ -alkylation of oxazolones by iridium catalysis

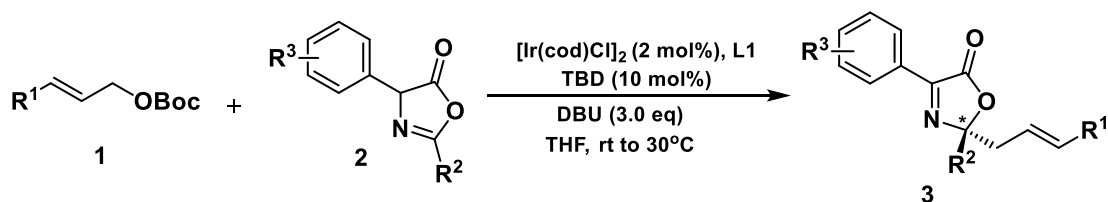

The reaction was carried out in the glovebox under argon atmosphere.  $[Ir(cod)Cl]_2$  (1.4 mg, 0.002 mmol), **L1** (2.5 mg, 0.004 mmol), and TBD (1.4 mg, 0.01 mmol) were added to a 2 dram scintillation vial (vial **A**) equipped with a magnetic stirring bar. The vial **A** was then charged with THF (0.5 mL) and stirred at 30°C for 30 min. To another 2 dram scintillation vial (vial **B**) was added *tert*-butyl cinnamyl carbonates (0.1 mmol), 2,4-diphenyloxazol-5(4*H*)-one (0.2 mmol), DBU (0.3 mmol) and THF (0.5 mL). The pre-formed catalyst solution (vial **A**) was then transferred to vial **B**. The vial **B** was sealed and stirred at room temperature or 30°C for a certain time. Upon completion of the reaction, the vial **B** was removed from the glovebox and uncapped. Saturated  $NH_4Cl$  aqueous solution was added and the mixture was extracted with DCM (10 mL x 3). The combined organic phase was washed with brine, dried over  $Na_2SO_4$ , filtered and concentrated in vacuo. The residue was purified

by column chromatography over silica gel to afford the desired products. (PS: No desired products were obtained using allylic carbonates bearing a -Me group at  $\alpha$  or  $\beta$  position.)

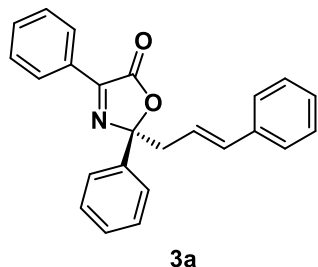

Following the general procedure **C**, **3a** was obtained as yellow solid (29 mg, 82% yield).  $^1\text{H}$  NMR (500 MHz, Chloroform-*d*)  $\delta$  8.44 (dt,  $J = 7.3, 1.4$  Hz, 2H), 7.73 – 7.71 (m, 2H), 7.60 – 7.56 (m, 1H), 7.52 – 7.49 (m, 2H), 7.45 (dd,  $J = 8.3, 6.5$  Hz, 2H), 7.42 – 7.38 (m, 1H), 7.28 (d,  $J = 3.6$  Hz, 4H), 7.24 – 7.21 (m, 1H), 6.48 (dt,  $J = 15.9, 1.4$  Hz, 1H), 6.01 (dt,  $J = 15.8, 7.4$  Hz, 1H), 3.18 (qdd,  $J = 14.2, 7.4, 1.3$  Hz, 2H).  $^{13}\text{C}$  NMR (126 MHz, Chloroform-*d*)  $\delta$  162.98, 155.22, 137.62, 135.73, 135.37, 131.53, 127.87, 127.74, 127.56, 127.50, 127.48, 126.63, 125.30, 125.01, 119.64, 105.14, 44.13. HPLC data (Chiralpak AD column, hexane : isopropanol = 90 : 10, 1.0 mL/min),  $t_r = 6.8$  min (major),  $t_r = 8.9$  min (minor), ee = 92%.

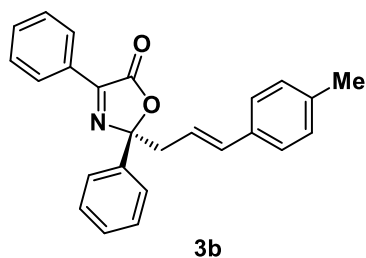

Following the general procedure **C**, **3b** was obtained as yellow oil (32 mg, 86% yield).  $^1\text{H}$  NMR (500 MHz, Chloroform-*d*)  $\delta$  8.44 – 8.42 (m, 2H), 7.72 – 7.70 (m, 2H), 7.59 – 7.55 (m, 1H), 7.50 (dd,  $J = 8.3, 6.9$  Hz, 2H), 7.46 – 7.43 (m, 2H), 7.41 – 7.37 (m, 1H), 7.17 (d,  $J = 7.9$  Hz, 2H), 7.08 (d,  $J = 7.8$  Hz, 2H), 6.44 (d,  $J = 15.8$  Hz, 1H), 5.94 (dt,  $J = 15.3, 7.4$  Hz, 1H), 3.16 (qdd,  $J = 14.1, 7.4, 1.3$  Hz, 2H), 2.32 (s, 3H).  $^{13}\text{C}$  NMR (126 MHz, Chloroform-*d*)  $\delta$  163.01, 155.21, 137.69, 136.49, 135.29, 132.99, 131.52, 128.19, 127.85, 127.76, 127.75, 127.74, 127.55, 125.22, 125.03, 118.53, 105.21, 44.15, 20.19. HRMS(ESI)  $m/z$ : calculated for  $[\text{C}_{25}\text{H}_{21}\text{NO}_2 + \text{Na}]^+$  390.1470,

found 390.1476. HPLC data (Chiralpak AD column, hexane : isopropanol = 90 : 10, 1.0 mL/min),  $t_r$  = 6.0 min (major),  $t_r$  = 6.9 min (minor), ee = 91%.

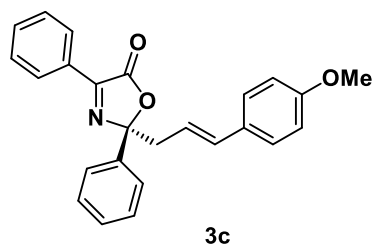

Following the general procedure **C**, **3c** was obtained as white solid (34 mg, 89% yield).  $^1\text{H}$  NMR (500 MHz, Chloroform-*d*)  $\delta$  8.46 – 8.44 (m, 2H), 7.75 – 7.73 (m, 2H), 7.63 – 7.60 (m, 1H), 7.55 – 7.52 (m, 2H), 7.48 (t,  $J$  = 7.8 Hz, 2H), 7.44 – 7.41 (m, 1H), 7.24 (d,  $J$  = 8.2 Hz, 2H), 6.85 – 6.84 (m, 2H), 6.44 (d,  $J$  = 15.8 Hz, 1H), 5.87 (dt,  $J$  = 15.3, 7.3 Hz, 1H), 3.83 (d,  $J$  = 1.2 Hz, 3H), 3.18 (qd,  $J$  = 14.2, 7.3 Hz, 2H).  $^{13}\text{C}$  NMR (126 MHz, Chloroform-*d*)  $\delta$  163.03, 158.23, 155.21, 137.71, 134.85, 131.51, 128.58, 127.84, 127.74, 127.74, 127.73, 127.55, 126.48, 125.02, 117.26, 112.90, 105.24, 54.26, 44.14. HPLC data (Chiralpak AD column, hexane : isopropanol = 90 : 10, 1.0 mL/min),  $t_r$  = 9.5 min (major),  $t_r$  = 11.8 min (minor), ee = 84%.

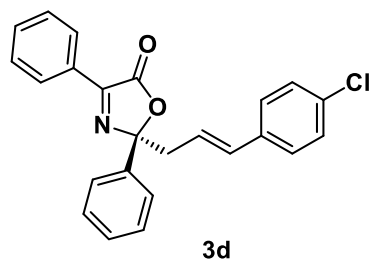

Following the general procedure **C**, **3d** was obtained as white solid (25 mg, 66% yield).  $^1\text{H}$  NMR (500 MHz, Chloroform-*d*)  $\delta$  8.40 – 8.38 (m, 2H), 7.68 – 7.66 (m, 2H), 7.57 (t,  $J$  = 7.4 Hz, 1H), 7.49 (t,  $J$  = 7.7 Hz, 2H), 7.41 – 7.36 (m, 3H), 7.21 (d,  $J$  = 8.5 Hz, 2H), 7.15 (d,  $J$  = 8.4 Hz, 2H), 6.38 (d,  $J$  = 15.9 Hz, 1H), 5.94 (dt,  $J$  = 15.4, 7.4 Hz, 1H), 3.18 – 3.07 (m, 2H).  $^{13}\text{C}$  NMR (126 MHz, Chloroform-*d*)  $\delta$  162.93, 155.24, 137.49, 134.16, 134.15, 132.30, 131.61, 127.93, 127.77, 127.72, 127.66, 127.58, 127.43, 126.48, 124.98, 120.41, 105.03, 44.05. HPLC data (Chiralpak IA column, hexane : isopropanol = 90 : 10, 1.0 mL/min),  $t_r$  = 6.7 min (major),  $t_r$  = 7.6 min (minor), ee = 86%.



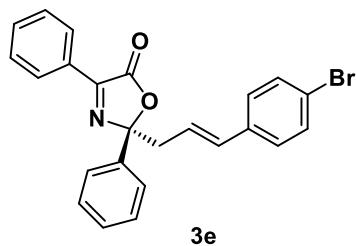

Following the general procedure **C**, **3e** was obtained as yellow solid (26 mg, 60% yield).  $^1\text{H}$  NMR (500 MHz, Chloroform-*d*)  $\delta$  8.39 – 8.37 (m, 2H), 7.67 – 7.65 (m, 2H), 7.56 (s, 1H), 7.48 (dd,  $J = 8.4, 7.0$  Hz, 2H), 7.41 – 7.40 (m, 2H), 7.37 (dd,  $J = 7.9, 6.5$  Hz, 3H), 7.10 – 7.08 (m, 2H), 6.34 (s, 1H), 5.95 (dt,  $J = 15.4, 7.4$  Hz, 1H), 3.17 – 3.06 (m, 2H).  $^{13}\text{C}$  NMR (126 MHz, Chloroform-*d*)  $\delta$  162.93, 155.24, 137.48, 134.60, 134.20, 131.63, 130.61, 127.94, 127.78, 127.72, 127.59, 127.42, 126.81, 124.98, 120.56, 120.47, 105.00, 44.06. HPLC data (Chiralpak AD column, hexane : isopropanol = 98 : 2, 1.0 mL/min),  $t_r = 18.4$  min (major),  $t_r = 21.2$  min (minor), ee = 87%.

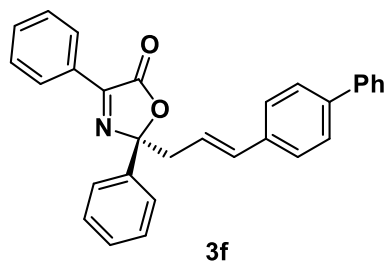

Following the general procedure **C**, **3f** was obtained as white solid (28 mg, 65% yield).  $^1\text{H}$  NMR (500 MHz, Chloroform-*d*)  $\delta$  8.43 – 8.41 (m, 2H), 7.72 – 7.69 (m, 2H), 7.57 (ddd,  $J = 7.2, 3.5, 1.5$  Hz, 3H), 7.51 – 7.48 (m, 4H), 7.44 (td,  $J = 7.9, 7.4, 3.5$  Hz, 4H), 7.41 – 7.38 (m, 1H), 7.34 (dd,  $J = 10.6, 7.8$  Hz, 3H), 6.49 (d,  $J = 15.8$  Hz, 1H), 6.06 – 6.00 (m, 1H), 3.18 (qdd,  $J = 14.2, 7.4, 1.3$  Hz, 2H).  $^{13}\text{C}$  NMR (126 MHz, Chloroform-*d*)  $\delta$  162.99, 155.25, 139.63, 139.43, 137.63, 134.94, 134.76, 131.57, 127.90, 127.77, 127.59, 127.53, 126.31, 126.21, 125.92, 125.74, 125.04, 119.76, 105.16, 44.21. HRMS(ESI)  $m/z$ : calculated for  $[\text{C}_{30}\text{H}_{23}\text{NO}_2 + \text{H}]^+$  430.1807, found 430.1797. HPLC data (Chiralpak AD column, hexane : isopropanol = 90 : 10, 1.0 mL/min),  $t_r = 10.1$  min (major),  $t_r = 11.1$  min (minor), ee = 92%.

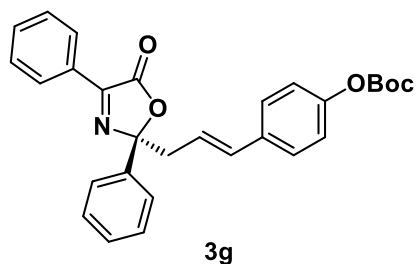

Following the general procedure **C**, **3g** was obtained as white solid (27 mg, 58% yield).  $^1\text{H}$  NMR (500 MHz, Chloroform-*d*)  $\delta$  8.41 – 8.39 (m, 2H), 7.68 – 7.66 (m, 2H), 7.58 – 7.54 (m, 1H), 7.49 (dd,  $J = 8.3, 6.9$  Hz, 2H), 7.43 – 7.40 (m, 2H), 7.39 – 7.35 (m, 1H), 7.24 – 7.22 (m, 2H), 7.07 – 7.04 (m, 2H), 6.41 (d,  $J = 15.8$  Hz, 1H), 5.92 (dt,  $J = 15.8, 7.4$  Hz, 1H), 1.55 (s, 9H).  $^{13}\text{C}$  NMR (126 MHz, Chloroform-*d*)  $\delta$  162.93, 155.21, 150.78, 149.44, 137.55, 134.33, 133.44, 131.57, 127.89, 127.76, 127.73, 127.56, 127.46, 126.20, 125.00, 120.31, 119.95, 105.09, 82.61, 44.10, 26.68. HRMS(ESI)  $m/z$ : calculated for  $[\text{C}_{29}\text{H}_{27}\text{NO}_5 + \text{H}]^+$  470.1967, found 470.1965. HPLC data (Chiralpak AD column, hexane : isopropanol = 90 : 10, 1.0 mL/min),  $t_r = 11.7$  min (minor),  $t_r = 12.3$  min (major), ee = 87%.

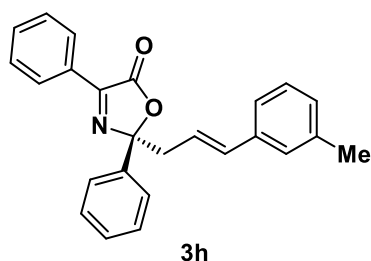

Following the general procedure **C**, **3h** was obtained as yellow solid (16 mg, 44% yield).  $^1\text{H}$  NMR (500 MHz, Chloroform-*d*)  $\delta$  8.40 – 8.38 (m, 2H), 7.68 – 7.66 (m, 2H), 7.55 (t,  $J = 7.6$  Hz, 1H), 7.48 (t,  $J = 7.6$  Hz, 2H), 7.43 – 7.35 (m, 3H), 7.13 (t,  $J = 7.6$  Hz, 1H), 7.04 – 7.00 (m, 3H), 6.40 (d,  $J = 15.8$  Hz, 1H), 5.94 (dt,  $J = 15.4, 7.4$  Hz, 1H), 3.12 (dt,  $J = 14.3, 7.3$  Hz, 2H), 2.28 (s, 3H).  $^{13}\text{C}$  NMR (126 MHz, Chloroform-*d*)  $\delta$  162.99, 155.20, 137.64, 137.03, 135.71, 135.68, 135.48, 131.51, 127.85, 127.74, 127.73, 127.54, 127.42, 127.36, 122.42, 119.39, 105.17, 44.14, 20.33. HPLC data (Chiralpak AD column, hexane : isopropanol = 90 : 10, 1.0 mL/min),  $t_r = 6.1$  min (major),  $t_r = 8.3$  min (minor), ee = 91%.

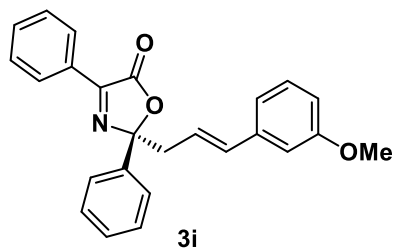

Following the general procedure **C**, **3i** was obtained as yellow oil (32 mg, 84% yield).

$^1\text{H}$  NMR (500 MHz, Chloroform-*d*)  $\delta$  8.47 – 8.44 (m, 2H), 7.75 – 7.72 (m, 2H), 7.61 (td,  $J = 7.1, 1.4$  Hz, 1H), 7.54 (t,  $J = 7.7$  Hz, 2H), 7.49 – 7.41 (m, 3H), 7.22 (td,  $J = 7.6, 1.1$  Hz, 1H), 6.89 (dd,  $J = 7.6, 1.3$  Hz, 1H), 6.82 – 6.80 (m, 2H), 6.47 (d,  $J = 15.8$  Hz, 1H), 6.05 – 5.99 (m, 1H), 3.80 (s, 3H), 3.19 (qdd,  $J = 14.2, 7.4, 1.2$  Hz, 2H).  $^{13}\text{C}$  NMR (126 MHz, Chloroform-*d*)  $\delta$  164.01, 159.72, 156.27, 138.64, 138.25, 136.34, 136.34, 132.59, 129.51, 128.93, 128.79, 128.61, 128.56, 126.06, 121.10, 119.00, 113.32, 111.71, 106.16, 55.19, 45.12. HRMS(ESI)  $m/z$ : calculated for  $[\text{C}_{25}\text{H}_{21}\text{NO}_3 + \text{Na}]^+$  406.1419, found 406.1418. HPLC data (Chiralpak AD column, hexane : isopropanol = 90 : 10, 1.0 mL/min),  $t_r = 8.5$  min (major),  $t_r = 12.3$  min (minor), ee = 94%.

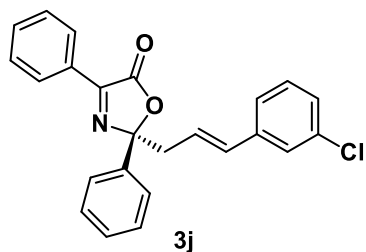

Following the general procedure **C**, **3j** was obtained as yellow solid (33 mg, 85% yield).  $^1\text{H}$  NMR (500 MHz, Chloroform-*d*)  $\delta$  8.46 (d,  $J = 7.7$  Hz, 2H), 7.73 (d,  $J = 7.6$  Hz, 2H), 7.62 (t,  $J = 7.3$  Hz, 1H), 7.54 (t,  $J = 7.6$  Hz, 2H), 7.48 (t,  $J = 7.4$  Hz, 2H), 7.43 (t,  $J = 7.3$  Hz, 1H), 7.27 (s, 1H), 7.22 (d,  $J = 5.1$  Hz, 2H), 7.15 (dd,  $J = 6.7, 2.7$  Hz, 1H), 6.42 (d,  $J = 15.8$  Hz, 1H), 6.04 (dt,  $J = 15.3, 7.4$  Hz, 1H), 3.24 – 3.13 (m, 2H).  $^{13}\text{C}$  NMR (126 MHz, Chloroform-*d*)  $\delta$  162.92, 155.24, 137.53, 137.44, 134.00, 133.42, 131.64, 128.73, 127.96, 127.79, 127.75, 127.61, 127.43, 126.62, 125.26, 125.00, 123.47, 121.39, 105.01, 44.08. HRMS(ESI)  $m/z$ : calculated for  $[\text{C}_{24}\text{H}_{18}\text{ClNO}_2 + \text{H}]^+$  388.1104, found 388.1101. HPLC data (Chiralpak AD column, hexane :

isopropanol = 90 : 10, 1.0 mL/min),  $t_r$  = 7.5 min (major),  $t_r$  = 9.5 min (minor), ee = 90%.

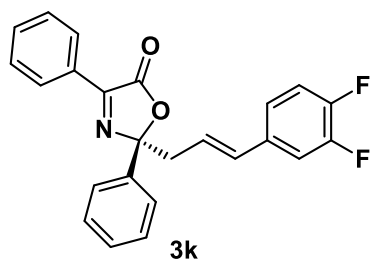

Following the general procedure **C**, **3k** was obtained as yellow solid (20 mg, 52% yield).  $^1\text{H}$  NMR (500 MHz, Chloroform-*d*)  $\delta$  8.45 (d,  $J$  = 7.8 Hz, 2H), 7.72 (d,  $J$  = 7.6 Hz, 2H), 7.62 (t,  $J$  = 7.4 Hz, 1H), 7.54 (t,  $J$  = 7.6 Hz, 2H), 7.46 (dt,  $J$  = 15.3, 7.2 Hz, 3H), 7.08 (td,  $J$  = 9.1, 5.5 Hz, 2H), 6.98 (t,  $J$  = 6.2 Hz, 1H), 6.39 (d,  $J$  = 15.8 Hz, 1H), 5.93 (dt,  $J$  = 15.3, 7.4 Hz, 1H), 3.23 – 3.12 (m, 2H).  $^{13}\text{C}$  NMR (126 MHz, Chloroform-*d*)  $\delta$  162.89, 155.26, 137.41, 133.30, 131.66, 127.97, 127.79, 127.72, 127.61, 127.40, 124.97, 121.49 (d,  $J$  = 3.5 Hz), 121.44 (d,  $J$  = 3.4 Hz), 120.94, 116.31, 116.17, 113.70, 113.56, 104.95, 43.92.  $^{19}\text{F}$  NMR (470 MHz, Chloroform-*d*)  $\delta$  -137.87 (ddd,  $J$  = 20.2, 11.5, 8.3 Hz), -138.82 – -138.91 (m). HRMS(ESI)  $m/z$ : calculated for  $[\text{C}_{24}\text{H}_{17}\text{F}_2\text{NO}_2 + \text{H}]^+$  390.1306, found 390.1301. HPLC data (Chiralpak IG column, hexane : isopropanol = 90 : 10, 1.0 mL/min),  $t_r$  = 8.7 min (major),  $t_r$  = 10.1 min (minor), ee = 91%.

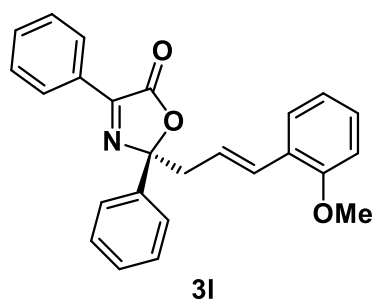

Following the general procedure **C**, **3l** was obtained as yellow oil (17 mg, 44% yield).  $^1\text{H}$  NMR (500 MHz, Chloroform-*d*)  $\delta$  8.42 – 8.39 (m, 2H), 7.71 – 7.68 (m, 2H), 7.57 – 7.54 (m, 1H), 7.50 – 7.47 (m, 2H), 7.44 – 7.40 (m, 2H), 7.39 – 7.36 (m, 1H), 7.24 – 7.22 (m, 1H), 7.18 (td,  $J$  = 7.8, 1.7 Hz, 1H), 6.85 (td,  $J$  = 7.5, 1.0 Hz, 1H), 6.80 (dd,  $J$  = 8.3, 1.0 Hz, 1H), 6.74 (d,  $J$  = 16.0 Hz, 1H), 5.96 (dt,  $J$  = 15.9, 7.4 Hz, 1H), 3.73 (s, 3H), 3.22 – 3.13 (m, 2H).  $^{13}\text{C}$  NMR (126 MHz, Chloroform-*d*)  $\delta$  163.05, 155.60,

155.23, 137.80, 131.42, 130.49, 127.79, 127.75, 127.68, 127.63, 127.61, 127.52, 126.04, 125.01, 124.93, 120.38, 119.54, 109.78, 105.23, 54.31, 44.40. HRMS(ESI)  $m/z$ : calculated for  $[C_{25}H_{21}NO_3 + H]^+$  384.1600, found 384.1592. HPLC data (Chiralpak AD column, hexane : isopropanol = 90 : 10, 1.0 mL/min),  $t_r$  = 8.2 min (major),  $t_r$  = 13.3 min (minor), ee = 83%.

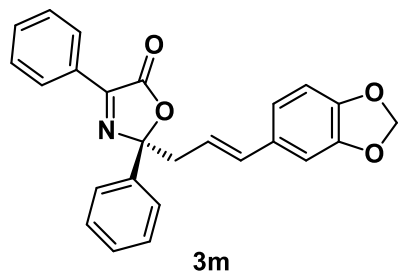

Following the general procedure **C**, **3m** was obtained as yellow oil (32 mg, 81% yield).  $^1H$  NMR (500 MHz, Chloroform-*d*)  $\delta$  8.46 – 8.44 (m, 2H), 7.74 – 7.72 (m, 2H), 7.63 – 7.59 (m, 1H), 7.54 (t,  $J$  = 7.7 Hz, 2H), 7.49 – 7.46 (m, 2H), 7.44 – 7.42 (m, 1H), 6.82 (d,  $J$  = 1.4 Hz, 1H), 6.75 – 6.71 (m, 2H), 6.39 (d,  $J$  = 15.8 Hz, 1H), 5.96 (s, 2H), 5.84 (dt,  $J$  = 15.7, 7.4 Hz, 1H), 3.16 (qdd,  $J$  = 14.1, 7.3, 1.2 Hz, 2H).  $^{13}C$  NMR (126 MHz, Chloroform-*d*)  $\delta$  164.02, 156.26, 147.94, 147.30, 136.01, 132.57, 131.26, 128.90, 128.79, 128.77, 128.60, 128.56, 128.51, 126.05, 121.05, 118.78, 108.24, 106.20, 105.62, 101.06, 45.08. HRMS(ESI)  $m/z$ : calculated for  $[C_{25}H_{19}NO_4 + H]^+$  398.1392, found 398.1391. HPLC data (Chiralpak AD column, hexane : isopropanol = 90 : 10, 1.0 mL/min),  $t_r$  = 11.2 min (major),  $t_r$  = 13.6 min (minor), ee = 90%.

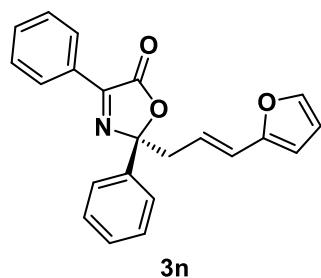

Following the general procedure **C**, **3n** was obtained as yellow oil (26 mg, 76% yield).  $^1H$  NMR (500 MHz, Chloroform-*d*)  $\delta$  8.42 – 8.40 (m, 2H), 7.68 – 7.66 (m, 2H), 7.58 – 7.55 (m, 1H), 7.50 – 7.47 (m, 2H), 7.44 – 7.36 (m, 4H), 6.31 (dd,  $J$  = 3.4, 1.8 Hz, 1H), 6.25 (d,  $J$  = 15.8 Hz, 1H), 6.14 (d,  $J$  = 3.4 Hz, 1H), 5.90 (dt,  $J$  = 15.5, 7.5 Hz, 1H), 3.16 – 3.07 (m, 2H).  $^{13}C$  NMR (126 MHz, Chloroform-*d*)  $\delta$  163.98, 156.27,

152.18, 142.00, 138.65, 132.54, 128.90, 128.82, 128.80, 128.75, 128.58, 126.04, 124.40, 119.22, 111.15, 107.93, 106.05, 45.04. HRMS(ESI)  $m/z$ : calculated for  $[C_{22}H_{17}NO_3 + H]^+$  344.1287, found 344.1280. HPLC data (Chiralpak AD column, hexane : isopropanol = 90 : 10, 1.0 mL/min),  $t_r$  = 7.9 min (major),  $t_r$  = 11.4 min (minor), ee = 83%.

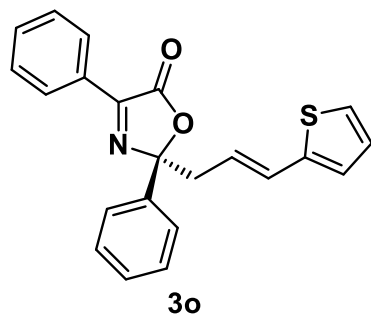

Following the general procedure **C**, **3o** was obtained as yellow oil (28 mg, 78% yield).  $^1H$  NMR (500 MHz, Chloroform-*d*)  $\delta$  8.41 (d,  $J$  = 7.7 Hz, 2H), 7.69 (dd,  $J$  = 7.2, 1.5 Hz, 2H), 7.59 – 7.55 (m, 1H), 7.50 (dd,  $J$  = 8.4, 6.9 Hz, 2H), 7.43 (t,  $J$  = 7.2 Hz, 2H), 7.40 – 7.36 (m, 1H), 7.09 (d,  $J$  = 5.1 Hz, 1H), 6.91 (dd,  $J$  = 5.1, 3.5 Hz, 1H), 6.86 (d,  $J$  = 3.5 Hz, 1H), 6.56 (d,  $J$  = 15.7 Hz, 1H), 5.82 (dt,  $J$  = 15.3, 7.4 Hz, 1H), 3.11 (qd,  $J$  = 14.3, 7.4 Hz, 2H).  $^{13}C$  NMR (126 MHz, Chloroform-*d*)  $\delta$  162.94, 155.28, 140.67, 137.50, 131.56, 128.30, 127.91, 127.81, 127.75, 127.57, 127.49, 126.29, 125.01, 124.67, 123.31, 119.25, 105.04, 44.02. HPLC data (Chiralpak AD column, hexane : isopropanol = 90 : 10, 1.0 mL/min),  $t_r$  = 8.1 min (major),  $t_r$  = 10.8 min (minor), ee = 91%.

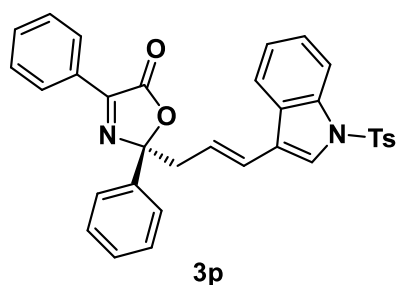

Following the general procedure **C**, **3p** was obtained as red oil (30 mg, 55% yield).  $^1H$  NMR (500 MHz, Chloroform-*d*)  $\delta$  8.45 (d,  $J$  = 7.7 Hz, 2H), 7.99 (d,  $J$  = 8.4 Hz, 1H), 7.76 (t,  $J$  = 8.9 Hz, 4H), 7.62 (t,  $J$  = 7.6 Hz, 1H), 7.55 – 7.50 (m, 4H), 7.48 – 7.40 (m, 3H), 7.35 – 7.31 (m, 1H), 7.24 (d,  $J$  = 8.1 Hz, 2H), 7.19 (t,  $J$  = 7.6 Hz, 1H), 6.53 (d,  $J$  = 16.0 Hz, 1H), 6.06 (dt,  $J$  = 15.5, 7.3 Hz, 1H), 3.21 (qd,  $J$  = 14.2, 7.3 Hz, 2H), 2.38

(s, 3H).  $^{13}\text{C}$  NMR (126 MHz, Chloroform-*d*)  $\delta$  162.98, 155.29, 144.02, 137.51, 134.33, 133.98, 131.61, 128.91, 127.95, 127.80, 127.78, 127.74, 127.61, 127.46, 126.02, 125.82, 125.02, 123.85, 122.95, 122.45, 121.25, 119.28, 118.99, 112.66, 105.08, 44.55, 20.58. HRMS(ESI)  $m/z$ : calculated for  $[\text{C}_{33}\text{H}_{26}\text{N}_2\text{O}_4\text{S} + \text{H}]^+$  547.1692, found 547.1687. HPLC data (Chiralpak AD column, hexane : isopropanol = 70 : 30, 1.0 mL/min),  $t_r$  = 16.3 min (major),  $t_r$  = 23.9 min (minor), ee = 88%.

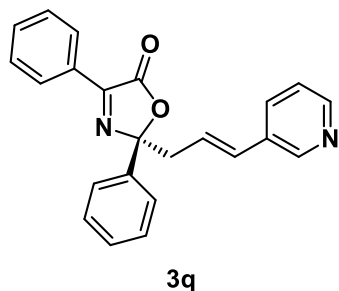

Following the general procedure C, **3q** was obtained as yellow solid (23 mg, 65% yield).  $^1\text{H}$  NMR (500 MHz, Chloroform-*d*)  $\delta$  8.45 – 8.38 (m, 4H), 7.68 – 7.66 (m, 2H), 7.58 – 7.52 (m, 2H), 7.48 (t,  $J$  = 7.6 Hz, 2H), 7.44 – 7.36 (m, 3H), 7.17 (dd,  $J$  = 8.0, 4.8 Hz, 1H), 6.42 (d,  $J$  = 15.9 Hz, 1H), 6.04 (dt,  $J$  = 15.5, 7.3 Hz, 1H), 3.21 – 3.10 (m, 2H).  $^{13}\text{C}$  NMR (126 MHz, Chloroform-*d*)  $\delta$  162.87, 155.27, 147.72, 147.12, 137.38, 131.78, 131.68, 131.28, 127.99, 127.79, 127.72, 127.62, 127.37, 124.97, 122.41, 122.33, 104.91, 44.12. HRMS(ESI)  $m/z$ : calculated for  $[\text{C}_{23}\text{H}_{18}\text{N}_2\text{O}_2 + \text{H}]^+$  355.1447, found 355.1455. HPLC data (Chiralpak AD column, hexane : isopropanol = 85 : 15, 1.0 mL/min),  $t_r$  = 13.5 min (major),  $t_r$  = 17.0 min (minor), ee = 89%.

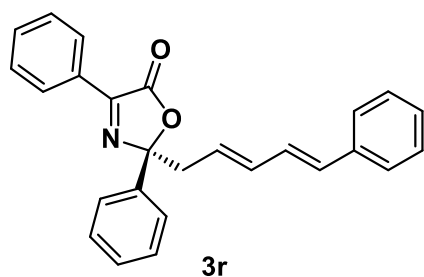

Following the general procedure C, **3r** was obtained as yellow solid (30 mg, 79% yield).  $^1\text{H}$  NMR (500 MHz, Chloroform-*d*)  $\delta$  8.43 – 8.41 (m, 2H), 7.68 – 7.67 (m, 2H), 7.59 – 7.55 (m, 1H), 7.50 (t,  $J$  = 7.6 Hz, 2H), 7.43 (dd,  $J$  = 8.1, 6.5 Hz, 2H), 7.40 – 7.38 (m, 1H), 7.34 (d,  $J$  = 7.3 Hz, 2H), 7.29 (t,  $J$  = 7.5 Hz, 2H), 7.21 (t,  $J$  = 7.2 Hz, 1H), 6.65 (dd,  $J$  = 15.7, 10.4 Hz, 1H), 6.45 (d,  $J$  = 15.7 Hz, 1H), 6.26 (dd,  $J$  = 15.2,

10.4 Hz, 1H), 5.54 (dt,  $J = 15.0, 7.5$  Hz, 1H), 3.14 – 3.05 (m, 2H).  $^{13}\text{C}$  NMR (126 MHz, Chloroform-*d*)  $\delta$  162.98, 155.20, 137.67, 136.02, 135.87, 131.57, 131.56, 127.88, 127.76, 127.56, 127.52, 127.15, 126.58, 125.37, 124.98, 123.41, 105.07, 43.94. HRMS(ESI)  $m/z$ : calculated for  $[\text{C}_{26}\text{H}_{21}\text{NO}_2 + \text{Na}]^+$  402.1470, found 402.1466. HPLC data (Chiralpak AD column, hexane : isopropanol = 95 : 5, 1.0 mL/min),  $t_r = 11.3$  min (major),  $t_r = 14.0$  min (minor), ee = 78%.

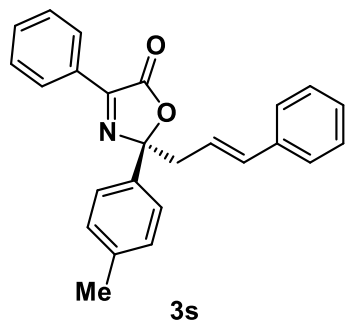

Following the general procedure **C**, **3s** was obtained as colorless oil (26 mg, 71% yield).  $^1\text{H}$  NMR (500 MHz, Chloroform-*d*)  $\delta$  8.47 – 8.44 (m, 2H), 7.63 – 7.59 (m, 3H), 7.54 (t,  $J = 7.7$  Hz, 2H), 7.33 – 7.29 (m, 5H), 7.27 – 7.24 (m, 2H), 6.51 (d,  $J = 15.9$  Hz, 1H), 6.03 (dt,  $J = 15.9, 7.3$  Hz, 1H), 3.20 (ddd,  $J = 15.7, 7.4, 1.3$  Hz, 2H), 2.43 (s, 3H).  $^{13}\text{C}$  NMR (126 MHz, Chloroform-*d*)  $\delta$  164.10, 156.18, 138.83, 136.84, 136.29, 135.75, 132.52, 129.27, 128.77, 128.77, 128.63, 128.53, 127.65, 126.36, 125.96, 120.87, 106.28, 45.10. HPLC data (Chiralpak AD column, hexane : isopropanol = 90 : 10, 1.0 mL/min),  $t_r = 7.9$  min (major),  $t_r = 10.4$  min (minor), ee = 84%.

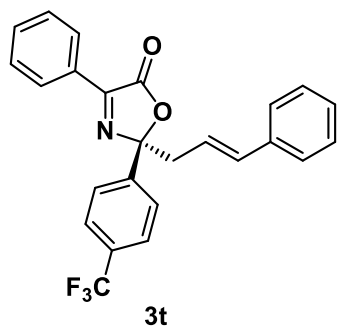

Following the general procedure **C**, **3t** was obtained as yellow oil (18 mg, 52% yield).  $^1\text{H}$  NMR (500 MHz, Chloroform-*d*)  $\delta$  8.47 – 8.44 (m, 2H), 7.88 (d,  $J = 8.2$  Hz, 2H), 7.74 (d,  $J = 8.2$  Hz, 2H), 7.65 – 7.61 (m, 1H), 7.55 (dd,  $J = 8.4, 6.9$  Hz, 2H), 7.34 – 7.25 (m, 5H), 6.49 (d,  $J = 15.9$  Hz, 1H), 6.01 (dt,  $J = 15.4, 7.4$  Hz, 1H), 3.18 (qdd,  $J = 14.3, 7.4, 1.2$  Hz, 2H).  $^{13}\text{C}$  NMR (126 MHz, Chloroform-*d*)  $\delta$  163.63, 156.58, 142.39



(d,  $J = 1.3$  Hz), 136.94, 136.55, 132.87, 130.99, 128.87, 128.83, 128.58, 128.26, 127.86, 126.61, 126.36, 125.61 (q,  $J = 3.8$  Hz), 123.86 (d,  $J = 272.1$  Hz), 119.98, 105.45, 45.22.  $^{19}\text{F}$  NMR (470 MHz, Chloroform-*d*)  $\delta$  -62.70 (d,  $J = 5.2$  Hz). HPLC data (Chiralpak AD column, hexane : isopropanol = 90 : 10, 1.0 mL/min),  $t_r = 5.8$  min (major),  $t_r = 7.0$  min (minor), ee = 84%.

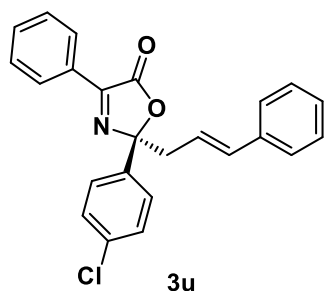

Following the general procedure **C**, **3u** was obtained as yellow oil (24 mg, 62% yield).  $^1\text{H}$  NMR (500 MHz, Chloroform-*d*)  $\delta$  8.40 – 8.38 (m, 2H), 7.62 – 7.61 (m, 2H), 7.56 (d,  $J = 7.4$  Hz, 1H), 7.49 (dd,  $J = 8.4, 7.0$  Hz, 2H), 7.40 – 7.38 (m, 2H), 7.27 – 7.21 (m, 5H), 6.43 (d,  $J = 15.8$  Hz, 1H), 5.95 (dt,  $J = 15.5, 7.4$  Hz, 1H), 3.09 (qdd,  $J = 14.2, 7.4, 1.2$  Hz, 2H).  $^{13}\text{C}$  NMR (126 MHz, Chloroform-*d*)  $\delta$  162.74, 155.35, 136.08, 135.62, 135.59, 133.91, 131.71, 127.79, 127.75, 127.52, 127.40, 127.33, 126.75, 126.51, 125.31, 119.29, 104.59, 44.20. HPLC data (Chiralpak AD column, hexane : isopropanol = 90 : 10, 1.0 mL/min),  $t_r = 7.3$  min (major),  $t_r = 9.6$  min (minor), ee = 91%.

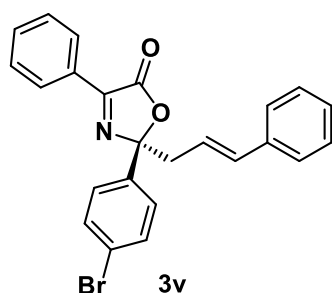

Following the general procedure **C**, **3v** was obtained as yellow oil (24 mg, 56% yield).  $^1\text{H}$  NMR (500 MHz, Chloroform-*d*)  $\delta$  8.40 – 8.38 (m, 2H), 7.59 – 7.53 (m, 5H), 7.49 (dd,  $J = 8.4, 7.0$  Hz, 2H), 7.28 – 7.19 (m, 5H), 6.43 (d,  $J = 15.9$  Hz, 1H), 5.95 (dt,  $J = 15.4, 7.4$  Hz, 1H), 3.15 – 3.04 (m, 2H).  $^{13}\text{C}$  NMR (126 MHz, Chloroform-*d*)  $\delta$  162.72, 155.36, 136.60, 135.64, 135.58, 131.73, 130.71, 127.80, 127.76, 127.53, 127.31,

126.80, 126.76, 125.32, 122.14, 119.25, 104.62, 44.15. HPLC data (Chiralpak AD column, hexane : isopropanol = 90 : 10, 1.0 mL/min),  $t_r$  = 7.6 min (major),  $t_r$  = 10.1 min (minor), ee = 91%.

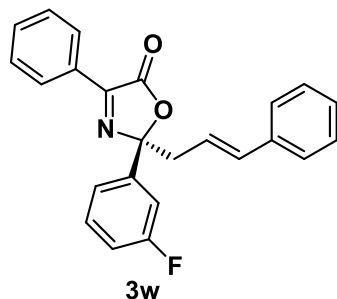

Following the general procedure **C**, **3w** was obtained as yellow solid (28 mg, 75% yield). <sup>1</sup>H NMR (500 MHz, Chloroform-*d*)  $\delta$  8.42 – 8.39 (m, 2H), 7.59 – 7.56 (m, 1H), 7.51 – 7.46 (m, 3H), 7.42 – 7.37 (m, 2H), 7.28 – 7.19 (m, 5H), 7.07 (td,  $J$  = 8.2, 2.2 Hz, 1H), 6.44 (d,  $J$  = 15.8 Hz, 1H), 5.95 (dt,  $J$  = 15.4, 7.4 Hz, 1H), 3.12 (qdd,  $J$  = 14.2, 7.4, 1.3 Hz, 2H). <sup>13</sup>C NMR (126 MHz, Chloroform-*d*)  $\delta$  162.64 (d,  $J$  = 18.4 Hz), 155.43, 139.88 (d,  $J$  = 7.5 Hz), 135.64 (d,  $J$  = 9.0 Hz), 131.72, 129.22 (d,  $J$  = 8.0 Hz), 127.79, 127.77, 127.51, 127.30, 126.74, 125.32, 120.72 (d,  $J$  = 3.2 Hz), 119.20, 114.93, 114.76, 112.57, 112.38, 104.38 (d,  $J$  = 2.4 Hz), 44.09. <sup>19</sup>F NMR (470 MHz, Chloroform-*d*)  $\delta$  -111.64 (td,  $J$  = 8.9, 5.5 Hz). HRMS(ESI)  $m/z$ : calculated for [C<sub>24</sub>H<sub>18</sub>FNO<sub>2</sub> + Na]<sup>+</sup> 394.1219, found 394.1215. HPLC data (Chiralpak AD column, hexane : isopropanol = 95 : 5, 1.0 mL/min),  $t_r$  = 7.2 min (major),  $t_r$  = 8.0 min (minor), ee = 92%.

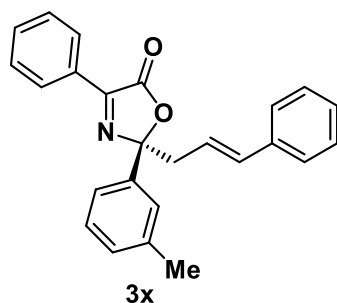

Following the general procedure **C**, **3x** was obtained as yellow oil (22 mg, 60% yield). <sup>1</sup>H NMR (500 MHz, Chloroform-*d*)  $\delta$  8.40 – 8.38 (m, 2H), 7.58 – 7.54 (m, 1H), 7.50 – 7.47 (m, 4H), 7.31 (t,  $J$  = 7.6 Hz, 1H), 7.27 – 7.23 (m, 4H), 7.21 – 7.18 (m, 2H), 6.47 – 6.43 (m, 1H), 5.96 (dt,  $J$  = 15.8, 7.3 Hz, 1H), 3.15 (qdd,  $J$  = 14.2, 7.4, 1.3 Hz,

2H), 2.40 (s, 3H).  $^{13}\text{C}$  NMR (126 MHz, Chloroform-*d*)  $\delta$  163.03, 155.17, 137.56, 137.35, 135.77, 135.34, 131.49, 128.59, 127.73, 127.55, 127.47, 127.46, 126.61, 125.58, 125.30, 122.09, 119.71, 105.19, 44.02, 20.54. HRMS(ESI) *m/z*: calculated for  $[\text{C}_{25}\text{H}_{21}\text{NO}_2 + \text{H}]^+$  368.1651, found 368.1643. HPLC data (Chiralpak AD column, hexane : isopropanol = 90 : 10, 1.0 mL/min), *tr* = 6.1 min (major), *tr* = 6.9 min (minor), ee = 92%.

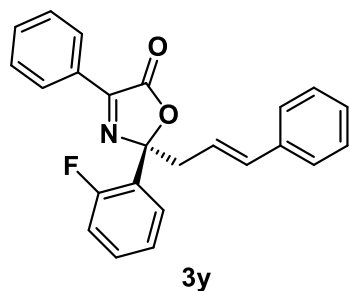

Following the general procedure **C**, **3y** was obtained as yellow oil (26 mg, 70% yield).  $^1\text{H}$  NMR (500 MHz, Chloroform-*d*)  $\delta$  8.43 – 8.41 (m, 2H), 7.58 (td, *J* = 7.5, 1.6 Hz, 2H), 7.49 (t, *J* = 7.6 Hz, 2H), 7.38 (tdd, *J* = 7.2, 4.8, 1.7 Hz, 1H), 7.27 – 7.23 (m, 4H), 7.21 – 7.18 (m, 1H), 7.17 – 7.13 (m, 2H), 6.49 (d, *J* = 15.9 Hz, 1H), 5.98 (dt, *J* = 15.5, 7.4 Hz, 1H), 3.37 – 3.25 (m, 2H).  $^{13}\text{C}$  NMR (126 MHz, Chloroform-*d*)  $\delta$  162.85, 155.81, 135.71, 135.48, 131.71, 130.14 (d, *J* = 8.6 Hz), 127.82, 127.78, 127.47, 127.34, 126.93 (d, *J* = 2.9 Hz), 126.64, 125.31, 123.21 (d, *J* = 3.6 Hz), 119.53, 115.83, 115.65, 103.54 (d, *J* = 4.9 Hz), 41.32 (d, *J* = 3.6 Hz).  $^{19}\text{F}$  NMR (470 MHz, Chloroform-*d*)  $\delta$  -111.34 (dt, *J* = 13.0, 6.4 Hz). HRMS(ESI) *m/z*: calculated for  $[\text{C}_{24}\text{H}_{18}\text{FNO}_2 + \text{Na}]^+$  394.1219, found 394.1217. HPLC data (Chiralpak AD column, hexane : isopropanol = 98 : 2, 1.0 mL/min), *tr* = 13.9 min (major), *tr* = 14.7 min (minor), ee = 91%.

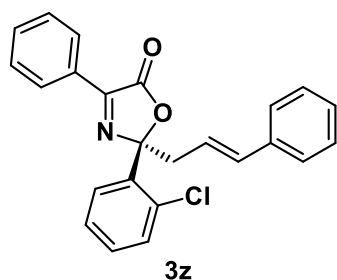

Following the general procedure **C**, **3z** was obtained as yellow solid (35 mg, 90% yield).  $^1\text{H}$  NMR (500 MHz, Chloroform-*d*)  $\delta$  8.41 – 8.38 (m, 2H), 7.64 – 7.62 (m, 2H),

7.59 – 7.56 (m, 1H), 7.50 (dd,  $J = 8.4, 6.9$  Hz, 2H), 7.41 – 7.39 (m, 2H), 7.29 – 7.20 (m, 5H), 6.44 (d,  $J = 15.8$  Hz, 1H), 5.96 (dt,  $J = 15.5, 7.4$  Hz, 1H), 3.10 (qdd,  $J = 14.2, 7.4, 1.2$  Hz, 2H).  $^{13}\text{C}$  NMR (126 MHz, Chloroform-*d*)  $\delta$  162.75, 155.35, 136.09, 135.63, 135.60, 133.91, 131.72, 128.40, 128.22, 127.80, 127.76, 127.53, 127.34, 126.76, 126.52, 125.32, 124.67, 119.30, 104.60, 44.21. HRMS(ESI)  $m/z$ : calculated for  $[\text{C}_{24}\text{H}_{18}\text{ClNO}_2 + \text{H}]^+$  388.1104, found 388.1095. HPLC data (Chiralpak AD column, hexane : isopropanol = 90 : 10, 1.0 mL/min),  $t_r = 7.3$  min (major),  $t_r = 9.6$  min (minor), ee = 92%.

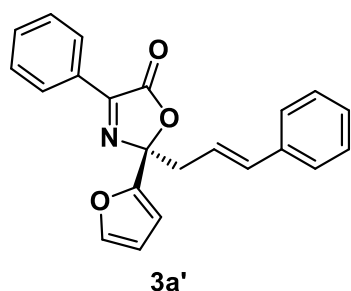

Following the general procedure **C**, **3a'** was obtained as yellow oil (25 mg, 73% yield).  $^1\text{H}$  NMR (500 MHz, Chloroform-*d*)  $\delta$  8.43 – 8.41 (m, 2H), 7.60 – 7.57 (m, 1H), 7.51 – 7.47 (m, 3H), 7.29 – 7.24 (m, 4H), 7.21 (td,  $J = 5.7, 2.5$  Hz, 1H), 6.56 – 6.48 (m, 2H), 6.39 (dd,  $J = 3.4, 1.8$  Hz, 1H), 6.02 (dt,  $J = 15.9, 7.3$  Hz, 1H), 3.32 (ddd,  $J = 7.3, 2.6, 1.3$  Hz, 2H).  $^{13}\text{C}$  NMR (126 MHz, Chloroform-*d*)  $\delta$  162.91, 156.71, 147.83, 142.68, 135.64, 135.46, 131.85, 127.90, 127.81, 127.50, 127.24, 126.71, 125.35, 119.00, 109.56, 108.03, 100.54, 39.59. HRMS(ESI)  $m/z$ : calculated for  $[\text{C}_{22}\text{H}_{17}\text{NO}_3 + \text{H}]^+$  344.1287, found 344.1286. HPLC data (Chiralpak AD column, hexane : isopropanol = 90 : 10, 1.0 mL/min),  $t_r = 7.1$  min (major),  $t_r = 8.3$  min (minor), ee = 89%.

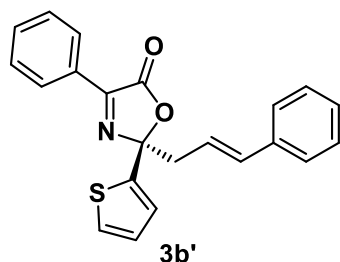

Following the general procedure **C**, **3b'** was obtained as yellow oil (13 mg, 36% yield).  $^1\text{H}$  NMR (500 MHz, Chloroform-*d*)  $\delta$  8.41 (d,  $J = 7.7$  Hz, 2H), 7.60 – 7.56 (m,

1H), 7.50 (t,  $J = 7.7$  Hz, 2H), 7.35 (dd,  $J = 5.1, 1.2$  Hz, 1H), 7.27 (dd,  $J = 4.3, 2.8$  Hz, 5H), 7.23 – 7.20 (m, 1H), 7.04 (dd,  $J = 5.1, 3.7$  Hz, 1H), 6.50 (d,  $J = 15.9$  Hz, 1H), 6.03 (dt,  $J = 15.4, 7.3$  Hz, 1H), 3.29 – 3.19 (m, 2H).  $^{13}\text{C}$  NMR (126 MHz, Chloroform-*d*)  $\delta$  162.79, 155.77, 139.15, 135.66, 135.62, 131.80, 127.88, 127.81, 127.51, 127.24, 126.73, 126.01, 125.41, 125.36, 124.77, 119.34, 103.23, 43.96. HRMS(ESI)  $m/z$ : calculated for  $[\text{C}_{22}\text{H}_{17}\text{NO}_2\text{S} + \text{Na}]^+$  382.0878, found 382.0875. HPLC data (Chiralpak AD column, hexane : isopropanol = 90 : 10, 1.0 mL/min),  $t_r = 7.6$  min (major),  $t_r = 8.8$  min (minor), ee = 86%.

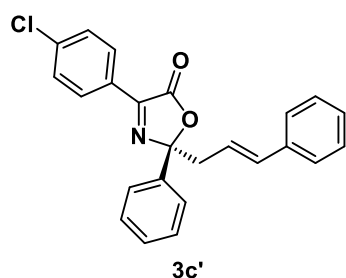

Following the general procedure **C**, **3c'** was obtained as yellow solid (20 mg, 52% yield).  $^1\text{H}$  NMR (500 MHz, Chloroform-*d*)  $\delta$  8.38 – 8.35 (m, 2H), 7.68 – 7.66 (m, 2H), 7.47 – 7.45 (m, 2H), 7.43 (td,  $J = 7.7, 7.2, 1.8$  Hz, 2H), 7.40 – 7.36 (m, 1H), 7.28 – 7.19 (m, 5H), 6.43 (d,  $J = 15.8$  Hz, 1H), 5.94 (dt,  $J = 15.8, 7.4$  Hz, 1H), 3.14 (qdd,  $J = 14.3, 7.4, 1.3$  Hz, 2H).  $^{13}\text{C}$  NMR (126 MHz, Chloroform-*d*)  $\delta$  163.79, 155.36, 139.11, 138.46, 136.70, 136.58, 130.10, 129.17, 129.00, 128.65, 128.55, 127.75, 126.95, 126.33, 126.01, 120.47, 106.38, 45.13. HRMS(ESI)  $m/z$ : calculated for  $[\text{C}_{24}\text{H}_{18}\text{ClNO}_2 + \text{H}]^+$  388.1104, found 388.1094. HPLC data (Chiralpak AD column, hexane : isopropanol = 90 : 10, 1.0 mL/min),  $t_r = 8.4$  min (major),  $t_r = 10.3$  min (minor), ee = 88%.

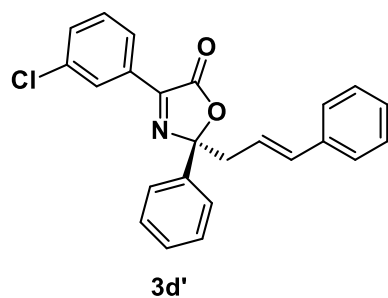

Following the general procedure **C**, **3d'** was obtained as yellow oil (33 mg, 85% yield).  $^1\text{H}$  NMR (500 MHz, Chloroform-*d*)  $\delta$  8.40 (t,  $J = 1.9$  Hz, 1H), 8.33 (dt,  $J = 7.8,$

1.3 Hz, 1H), 7.69 – 7.66 (m, 2H), 7.53 (ddd,  $J = 8.0, 2.2, 1.1$  Hz, 1H), 7.45 – 7.37 (m, 4H), 7.29 – 7.20 (m, 5H), 6.45 (d,  $J = 15.8$  Hz, 1H), 5.95 (dt,  $J = 15.9, 7.4$  Hz, 1H), 3.15 (qdd,  $J = 14.2, 7.4, 1.3$  Hz, 2H).  $^{13}\text{C}$  NMR (126 MHz, Chloroform-*d*)  $\delta$  162.52, 154.25, 137.31, 135.63, 135.61, 133.94, 131.60, 129.09, 129.06, 128.01, 127.63, 127.58, 127.52, 126.73, 125.91, 125.31, 124.98, 119.33, 105.41, 44.08. HRMS(ESI)  $m/z$ : calculated for  $[\text{C}_{24}\text{H}_{18}\text{ClNO}_2 + \text{H}]^+$  388.1104, found 388.1101. HPLC data (Chiralpak AD column, hexane : isopropanol = 90 : 10, 1.0 mL/min),  $t_r = 6.0$  min (major),  $t_r = 6.6$  min (minor), ee = 92%.

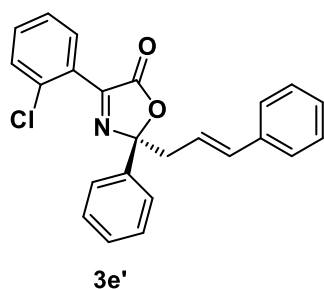

Following the general procedure **C**, **3e'** was obtained as yellow oil (16 mg, 41% yield).  $^1\text{H}$  NMR (500 MHz, Chloroform-*d*)  $\delta$  7.76 (dd,  $J = 7.5, 1.8$  Hz, 2H), 7.71 (dd,  $J = 7.8, 1.6$  Hz, 1H), 7.56 (d,  $J = 8.0$  Hz, 1H), 7.51 – 7.44 (m, 4H), 7.38 (td,  $J = 7.6, 1.1$  Hz, 1H), 7.34 – 7.30 (m, 4H), 7.27 (ddd,  $J = 8.6, 5.2, 2.5$  Hz, 1H), 6.54 (d,  $J = 15.8$  Hz, 1H), 6.07 (dt,  $J = 15.3, 7.4$  Hz, 1H), 3.26 (d,  $J = 7.4$  Hz, 2H).  $^{13}\text{C}$  NMR (126 MHz, Chloroform-*d*)  $\delta$  163.40, 158.12, 138.39, 136.94, 136.66, 133.85, 132.27, 131.26, 130.73, 129.09, 128.71, 128.56, 127.79, 127.67, 126.82, 126.39, 126.05, 120.19, 107.30, 44.83. HRMS(ESI)  $m/z$ : calculated for  $[\text{C}_{24}\text{H}_{18}\text{ClNO}_2 + \text{H}]^+$  388.1104, found 388.1095. HPLC data (Chiralpak AD column, hexane : isopropanol = 90 : 10, 1.0 mL/min),  $t_r = 8.0$  min (major),  $t_r = 9.2$  min (minor), ee = 94%.

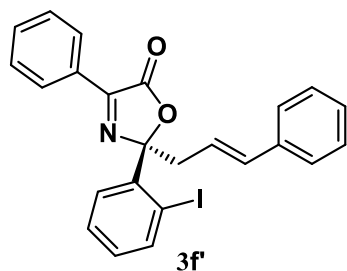

Following the general procedure **C**, **3f'** was obtained as yellow oil (27 mg, 56% yield).  $^1\text{H}$  NMR (500 MHz, Chloroform-*d*)  $\delta$  8.44 – 8.42 (m, 2H), 8.07 – 8.06 (m, 1H), 7.72

(dd,  $J = 7.9, 1.6$  Hz, 1H), 7.57 (t,  $J = 7.4$  Hz, 1H), 7.49 (t,  $J = 7.6$  Hz, 2H), 7.37 – 7.34 (m, 1H), 7.24 (d,  $J = 6.1$  Hz, 4H), 7.19 (td,  $J = 5.8, 2.4$  Hz, 1H), 7.02 (td,  $J = 7.7, 1.7$  Hz, 1H), 6.48 (d,  $J = 15.8$  Hz, 1H), 5.95 (dt,  $J = 15.4, 7.4$  Hz, 1H), 3.51 (dd,  $J = 14.3, 7.6$  Hz, 1H), 3.38 (dd,  $J = 14.3, 7.2$  Hz, 1H).  $^{13}\text{C}$  NMR (126 MHz, Chloroform- $d$ )  $\delta$  162.45, 155.21, 141.84, 139.42, 135.72, 135.55, 131.69, 129.41, 128.06, 127.90, 127.80, 127.46, 127.13, 126.64, 125.32, 119.38, 104.33, 91.96, 41.02. HRMS(ESI)  $m/z$ : calculated for  $[\text{C}_{24}\text{H}_{18}\text{INO}_2 + \text{Na}]^+$  502.0280, found 502.0276. HPLC data (Chiralpak AD column, hexane : isopropanol = 90 : 10, 1.0 mL/min),  $t_r = 6.1$  min (major),  $t_r = 6.6$  min (minor), ee = 88%.

#### General procedure D: One-pot synthesis of allylated 2,4-diaryloxazol-5(2H)-ones

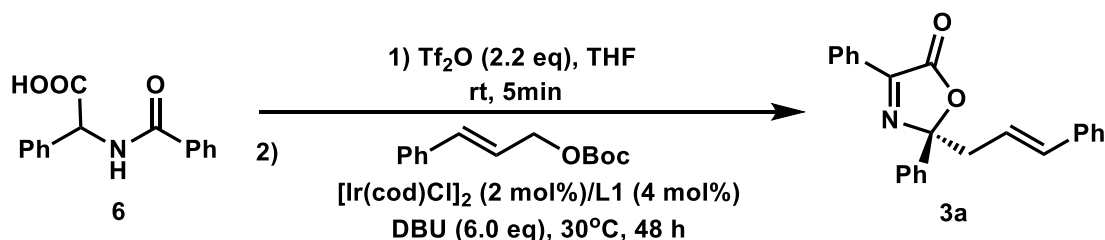

To a dried 5 mL vial was added 2-benzamido-2-phenylacetic acid (51 mg, 0.2 mmol), trifluoroacetic anhydride (31 mg, 0.22 mmol) and THF (0.5 mL) under the atmosphere of Ar. The reaction mixture was then stirred at room temperature for 5 min. Then, *tert*-butyl cinnamyl carbonate (23 mg, 0.1 mmol), and DBU (91 mg, 0.6 mmol) were added using a pipetting gun. A separate vial was charged of  $[\text{Ir}(\text{cod})\text{Cl}]_2$  (1.4 mg, 0.002 mmol), **L1** (2.5 mg, 0.004 mmol), TBD (1.4 mg, 0.01 mmol) and THF (0.5 mL). The mixture was stirred at  $30^\circ\text{C}$  for 30 min. The Iridium complex was then transferred to the first vial via syringe. The reaction mixture was stirred at the corresponding temperature for 48 hours. Upon completion of the reaction the vial was removed from the glovebox and uncapped. Saturated  $\text{NH}_4\text{Cl}$  aqueous solution was added and the mixture was extracted with DCM (10 mL x 3). The combined organic phase was washed with brine, dried over  $\text{Na}_2\text{SO}_4$ , filtered and concentrated in vacuo. The residue was purified by silica gel flash chromatography (PE:EA=100:1) to afford the desired product **3a** as a yellow solid (24 mg, 68% yield, ee=90%).

### General procedure E: Large scale synthesis of 3a.

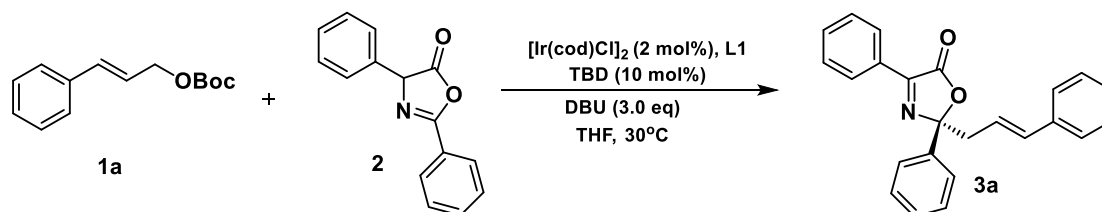

The reaction was carried out in the glovebox under argon atmosphere.  $[\text{Ir}(\text{cod})\text{Cl}]_2$  (14 mg, 0.02 mmol), L1 (25 mg, 0.04 mmol), and TBD (14 mg, 0.1 mmol) were added to a vial equipped with a magnetic stirring bar. The vial was then charged with THF (5.0 mL) and stirred at 30°C for 30 min. Pressure pipe was added *tert*-butyl cinnamyl carbonates (1.0 mmol), 2,4-diphenyloxazol-5(4*H*)-one (2.0 mmol), DBU (3.0 mmol) and THF (5.0 mL). The pre-formed catalyst solution was then transferred to pressure pipe. The mixture was stirred at 30°C for 24 h. Upon completion of the reaction, saturated  $\text{NH}_4\text{Cl}$  aqueous solution was added and the mixture was extracted with DCM (10 mL x 3). The combined organic phase was washed with brine, dried over  $\text{Na}_2\text{SO}_4$ , filtered and concentrated in vacuo. The residue was purified by silica gel flash chromatography (PE:EA=100:1) to afford the desired product 3a as a yellow solid (247 mg, 70% yield, ee=88%).

### Synthetic transformations.

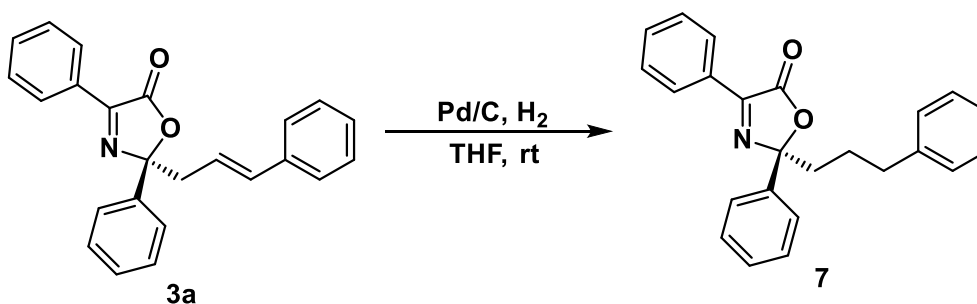

10 mg of Pd/C was added to a solution of (*S*)-2-cinnamyl-2,4-diphenyloxazol-5(2*H*)-one (35 mg, 0.1 mmol) in THF (1.0 mL). The mixture was hydrogenated for 2 hours. The suspension was filtered and the solvent was evaporated to obtain the crude product. The product was then purified by column chromatography to yield the desired product 7 as a colorless oil (21 mg, 59% yield).



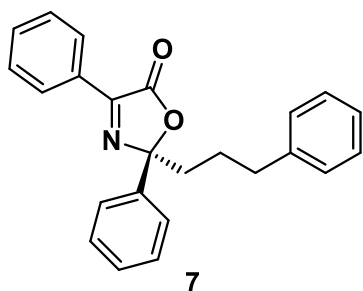

$^1\text{H}$  NMR (500 MHz, Chloroform-*d*)  $\delta$  8.49 – 8.47 (m, 2H), 7.68 – 7.65 (m, 2H), 7.61 – 7.58 (m, 1H), 7.53 (dd,  $J = 8.3, 6.9$  Hz, 2H), 7.46 – 7.38 (m, 3H), 7.30 (t,  $J = 7.5$  Hz, 2H), 7.21 (t,  $J = 7.5$  Hz, 1H), 7.16 – 7.14 (m, 2H), 2.65 (t,  $J = 7.7$  Hz, 2H), 2.37 (ddd,  $J = 14.0, 10.3, 5.9$  Hz, 1H), 2.27 (ddd,  $J = 14.1, 10.2, 6.1$  Hz, 1H), 1.72 – 1.65 (m, 2H).  $^{13}\text{C}$  NMR (126 MHz, Chloroform-*d*)  $\delta$  163.11, 154.58, 140.31, 137.91, 131.52, 127.74, 127.73, 127.59, 127.53, 127.39, 127.37, 127.02, 124.98, 124.96, 105.92, 40.11, 34.37, 23.88. HRMS(ESI)  $m/z$ : calculated for  $[\text{C}_{24}\text{H}_{21}\text{NO}_2 + \text{K}]^+$  394.1209, found 394.1203. HPLC data (Chiralpak AD column, hexane : isopropanol = 98 : 2, 1.0 mL/min),  $t_r = 8.2$  min (major),  $t_r = 9.2$  min (minor), ee = 91%.

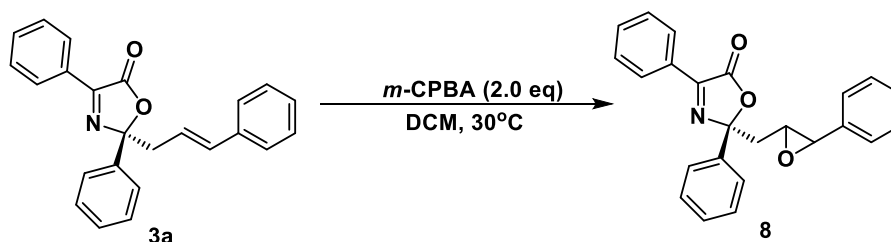

Under an argon atmosphere, a vial was charged with (*S*)-2-cinnamyl-2,4-diphenyloxazol-5(2*H*)-one (35 mg, 0.1 mmol), *m*-CPBA (34 mg, 0.2 mmol) and DCM (1.0 mL). The mixture is stirred vigorously for 2 hours at 30°C, and then quenched by addition of saturated  $\text{NH}_4\text{Cl}$  aqueous. The layers were separated and the aqueous phase was extracted with DCM (10 mL x 3). The combined organic layers were dried over  $\text{Na}_2\text{SO}_4$ , filtered and concentrated in vacuo. The crude product was purified by column chromatography over silica gel (PE: EA=100:1) to afford the compound **8** (26 mg, 70% yield) as a pale yellow oil.

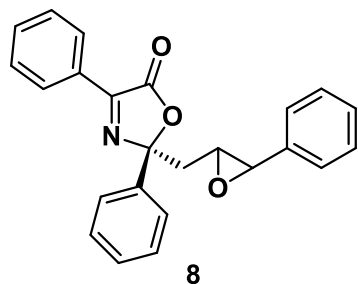

$^1\text{H}$  NMR (500 MHz, Chloroform-*d*)  $\delta$  8.43 – 8.41 (m, 2.02H), 8.40 – 8.38 (m, 2.05H), 7.66 – 7.64 (m, 4.11H), 7.58 (dt,  $J = 10.0, 7.4$  Hz, 2.38H), 7.49 (q,  $J = 7.5$  Hz, 5.06H), 7.41 (dd,  $J = 5.2, 1.9$  Hz, 5.94H), 7.29 (s, 1.36H), 7.26 – 7.24 (m, 3.97H), 7.07 (dd,  $J = 7.4, 2.1$  Hz, 2.02H), 7.03 (dd,  $J = 6.7, 3.0$  Hz, 2.05H), 3.47 (d,  $J = 1.9$  Hz, 1.02H), 3.45 (d,  $J = 1.9$  Hz, 1H), 3.04 (d,  $J = 6.8$  Hz, 1.01H), 3.02 (d,  $J = 1.9$  Hz, 1.02H), 2.75 (dd,  $J = 14.2, 5.3$  Hz, 1.14H), 2.69 (dd,  $J = 14.3, 5.5$  Hz, 1.14H), 2.52 (dd,  $J = 14.3, 6.5$  Hz, 1.12H), 2.45 (dd,  $J = 14.1, 6.7$  Hz, 1.12H).  $^{13}\text{C}$  NMR (126 MHz, Chloroform-*d*)  $\delta$  162.74, 162.54, 155.19, 154.91, 128.15, 128.10, 127.83, 127.78, 127.74, 127.39, 127.33, 127.31, 127.19, 127.15, 125.02, 124.92, 124.45, 124.43, 105.22, 104.32, 57.41, 57.15, 56.67, 56.58, 43.93, 43.84. HRMS(ESI)  $m/z$ : calculated for  $[\text{C}_{24}\text{H}_{19}\text{NO}_3 + \text{H}]^+$  370.1443, found 370.1438.

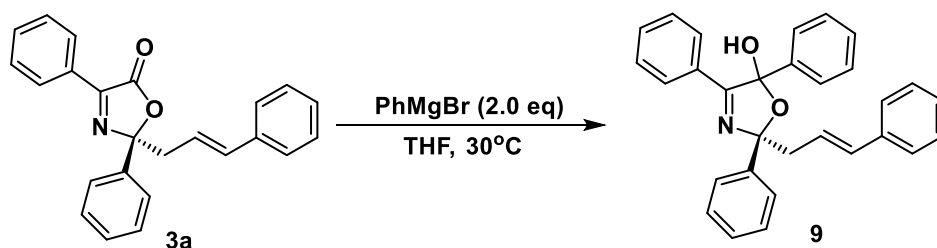

Under an argon atmosphere, PhMgBr (0.2 mL, 0.2 mmol, 1.0 M) was added to a solution of (*S*)-2-cinnamyl-2,4-diphenyloxazol-5(2*H*)-one (35 mg, 0.1 mmol) in THF (1.0 mL) at 30°C. After 1 hour, the solvent was removed and the product was purified by column chromatography on silica gel to afford the product as a white solid (43 mg, 99% yield).

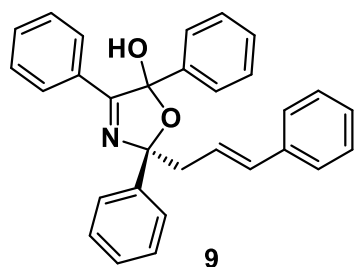

$^1\text{H}$  NMR (500 MHz, Chloroform-*d*)  $\delta$  7.91 – 7.88 (m, 2.02H), 7.86 – 7.83 (m, 1.68H), 7.78 (d,  $J = 1.6$  Hz, 1.97H), 7.74 (s, 1.7H), 7.60 (s, 0.75H), 7.58 (d,  $J = 1.6$  Hz, 0.96H), 7.43 – 7.40 (m, 3.28H), 7.36 (dq,  $J = 9.7, 5.6, 5.1$  Hz, 6.08H), 7.32 – 7.29 (m, 5.25H), 7.27 – 7.25 (m, 5.55H), 7.22 (dtd,  $J = 14.5, 7.6, 6.8, 2.9$  Hz, 6.48H), 6.64 (d,  $J = 16.0$  Hz, 1H), 6.43 (d,  $J = 15.9$  Hz, 0.82H), 6.28 – 6.24 (m, 1H), 6.23 – 6.19 (m, 0.82H), 3.28 – 3.14 (m, 1.98H), 3.04 (ddd,  $J = 59.0, 14.1, 8.3$  Hz, 2.28H).  $^{13}\text{C}$  NMR (126 MHz, Chloroform-*d*)  $\delta$  166.04, 142.31, 138.55, 135.32, 135.19, 133.20, 129.99, 128.67, 128.14, 127.77, 127.53, 127.47, 127.45, 127.35, 127.31, 127.25, 127.13, 126.97, 126.90, 126.81, 126.22, 125.54, 125.31, 125.22, 125.00, 124.82, 123.44, 123.12, 109.87, 108.91, 107.78, 107.46, 45.81. HRMS(ESI)  $m/z$ : calculated for  $[\text{C}_{30}\text{H}_{25}\text{NO}_2 + \text{H}]^+$  432.1964, found 432.1949.

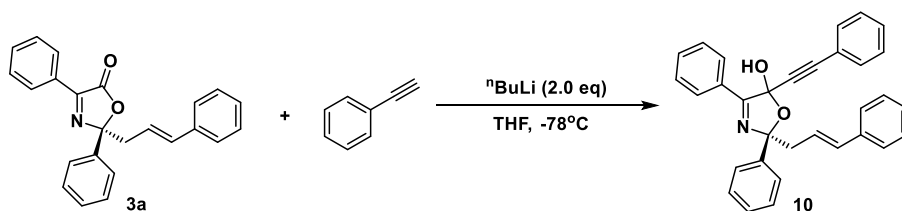

Under argon atmosphere, to a vial were added aryl acetylene (0.2 mmol) and dry THF (1.0 mL). The mixture was then stirred at  $-78^\circ\text{C}$  for 5 min. After that,  $^n\text{BuLi}$  (0.08 mL, 0.2 mmol, 2.5 M) was added dropwise *via* syringe. The reaction mixture was stirred at  $-78^\circ\text{C}$  for 1 hour, followed by dropwise addition of (*S*)-2-cinnamyl-2,4-diphenyloxazolidin-5(2*H*)-one (35 mg, 0.1 mmol) in THF (1.0 mL). The mixture was stirred at the same temperature for 3 hours. When the raw material reacted completely, the reaction was quenched with saturated  $\text{NH}_4\text{Cl}$  aqueous. The layers were separated and extracted with EA (20 mL $\times$ 3). The combined organic layers were dried over anhydrous  $\text{Na}_2\text{SO}_4$ , filtered and concentrated by vacuo. The crude product was purified by column chromatography over silica gel (PE: EA=100:1) to afford the product as a white solid

(37 mg, 82% yield).

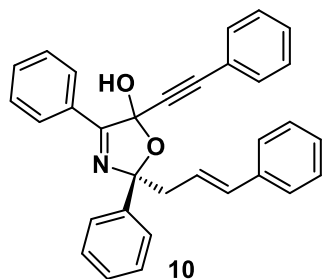

$^1\text{H}$  NMR (500 MHz, DMSO- $d_6$ )  $\delta$  8.46 (s, 0.30H), 8.35 (s, 1.01H), 8.21 – 8.17 (m, 2.68H), 7.67 (d,  $J = 7.6$  Hz, 2.75H), 7.46 (qd,  $J = 10.4, 9.0, 4.8$  Hz, 4.21H), 7.36 (t,  $J = 7.5$  Hz, 3.99H), 7.33 – 7.28 (m, 4H), 7.24 (s, 4.18H), 7.19 (d,  $J = 7.5$  Hz, 2.40H), 7.00 (dt,  $J = 14.6, 7.1$  Hz, 3.19H), 6.46 (d,  $J = 15.9$  Hz, 1H), 6.39 (d,  $J = 15.9$  Hz, 0.32H), 6.20 (ddt,  $J = 22.1, 15.3, 7.0$  Hz, 1.36H), 3.12 (td,  $J = 15.1, 7.2$  Hz, 1.35H), 3.00 (td,  $J = 16.9, 14.5, 6.8$  Hz, 1.36H).  $^{13}\text{C}$  NMR (126 MHz, DMSO- $d_6$ )  $\delta$  162.77, 162.56, 142.60, 141.42, 136.50, 136.43, 132.89, 132.25, 131.03, 130.93, 130.74, 130.60, 128.77, 128.68, 128.46, 128.24, 128.21, 128.18, 128.12, 128.02, 127.95, 127.78, 127.47, 127.44, 127.11, 127.05, 126.56, 126.48, 125.28, 125.22, 125.08, 123.96, 123.33, 120.42, 120.28, 110.03, 109.49, 100.11, 100.07, 87.06, 86.91, 85.32, 84.93, 45.07, 44.50. HRMS(ESI)  $m/z$ : calculated for  $[\text{C}_{32}\text{H}_{25}\text{NO}_2 + \text{H}]^+$  456.1964, found 456.1954.

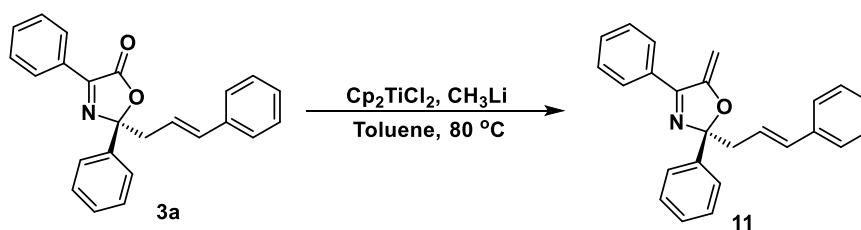

The compound **11** was synthesized according the literature with modifications.<sup>[3]</sup>  $\text{CH}_3\text{Li}$  (0.8 mL, 1.25 mmol) was added dropwise under argon atmosphere to a stirred slurry of titanocene dichloride (124 mg, 0.5 mmol) in dry toluene (2.0 mL) at  $-5^\circ\text{C}$ . After 1 hour, the reaction mixture was warmed to  $0^\circ\text{C}$  and then quenched carefully with ice-cold 6% aqueous  $\text{NH}_4\text{Cl}$  (3.0 mL). After separation, the organic layer was washed with water (10 mL) and brine (10 mL), dried over  $\text{Na}_2\text{SO}_4$  and filtered to provide a red solution. The solution was concentrated to one third the volume. The dimethyltitanocene was generally stored in the freezer and used as a 0.5 M solution in

toluene.

A solution of dimethyltitanocene and (*S*)-2-cinnamyl-2,4-diphenyloxazol-5(2*H*)-one (35 mg, 0.1 mmol) was stirred for 4 hours in the dark at 80°C under argon atmosphere. The solvent was removed and the product was purified by column chromatography, affording product as a colorless oil (30 mg, 85% yield).

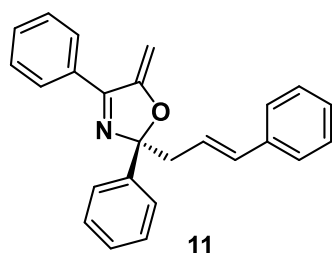

$^1\text{H}$  NMR (500 MHz, Chloroform-*d*)  $\delta$  7.68 (dd,  $J = 8.9, 7.2$  Hz, 4H), 7.50 – 7.46 (m, 1H), 7.44 – 7.39 (m, 4H), 7.35 – 7.31 (m, 2H), 7.28 – 7.25 (m, 3H), 7.21 – 7.18 (m, 1H), 6.46 (d,  $J = 15.9$  Hz, 1H), 6.11 (dt,  $J = 15.7, 7.3$  Hz, 1H), 4.83 (d,  $J = 2.6$  Hz, 1H), 4.52 (d,  $J = 2.6$  Hz, 1H), 3.09 (ddd,  $J = 7.5, 2.7, 1.3$  Hz, 2H).  $^{13}\text{C}$  NMR (126 MHz, Chloroform-*d*)  $\delta$  163.15, 157.32, 140.51, 136.42, 133.64, 130.29, 129.65, 127.55, 127.43, 127.41, 127.29, 127.04, 126.19, 125.18, 124.76, 121.75, 110.56, 84.61, 44.55. HRMS(ESI)  $m/z$ : calculated for  $[\text{C}_{25}\text{H}_{21}\text{NO} + \text{H}]^+$  352.1701, found 352.1694. HPLC data (Chiralpak AD column, hexane : isopropanol = 90 : 10, 1.0 mL/min),  $t_r = 5.0$  min (major),  $t_r = 5.5$  min (minor), ee = 90%.

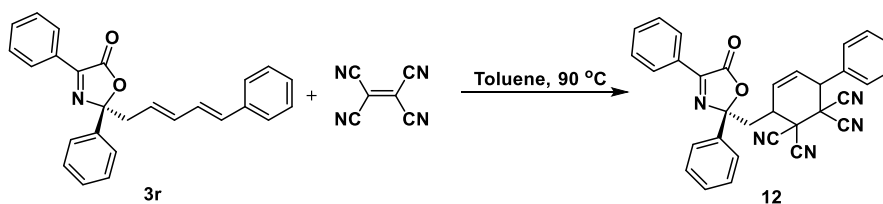

A solution of **3r** (38 mg, 0.1 mmol) and tetracyanoethylene (26 mg, 0.2 mmol) in 1.0 mL of toluene was heated at reflux for overnight. When the reaction completed, the mixture was added with water and extracted with EA (10 mL x 2). The combined organic phases were washed with saturated  $\text{NH}_4\text{Cl}$  solution, dried and evaporated. The crude mixture was purified by column chromatography to yield the product as a colorless oil (36 mg, 71% yield).

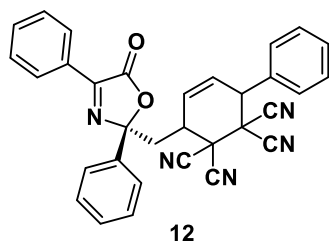

$^1\text{H}$  NMR (500 MHz, Chloroform-*d*)  $\delta$  8.50 (d,  $J = 7.6$  Hz, 1.93H), 8.46 (d,  $J = 7.8$  Hz, 2.46H), 7.72 – 7.71 (m, 4.60H), 7.66 – 7.62 (m, 2.18H), 7.61 – 7.52 (m, 9.93H), 7.50 – 7.45 (m, 9.92H), 7.44 – 7.40 (m, 4.66H), 6.13 (ddd,  $J = 10.8, 4.7, 2.8$  Hz, 1.33H), 6.01 (ddd,  $J = 10.8, 4.6, 2.7$  Hz, 1.06H), 5.95 (dt,  $J = 10.7, 2.2$  Hz, 1.25H), 5.91 – 5.88 (m, 0.98H), 4.25 (p,  $J = 2.7$  Hz, 2.32H), 3.26 – 3.14 (m, 4.89H), 2.82 (dd,  $J = 14.7, 8.9$  Hz, 1H), 2.70 (dd,  $J = 14.9, 9.6$  Hz, 1.26H).  $^{13}\text{C}$  NMR (126 MHz, Chloroform-*d*)  $\delta$  162.27, 161.86, 155.95, 155.31, 135.45, 134.90, 132.42, 132.32, 131.51, 129.38, 129.12, 128.66, 128.64, 128.46, 128.39, 128.34, 128.05, 127.99, 127.96, 126.90, 126.83, 126.55, 126.29, 125.32, 125.16, 123.76, 123.62, 109.97, 109.94, 109.92, 109.89, 108.91, 108.89, 108.51, 108.43, 103.87, 103.64, 45.79, 45.76, 43.50, 43.24, 42.81, 42.76, 42.09, 36.84, 36.70. HRMS(ESI)  $m/z$ : calculated for  $[\text{C}_{32}\text{H}_{21}\text{N}_5\text{O}_2 + \text{Na}]^+$  530.1593, found 530.1584.

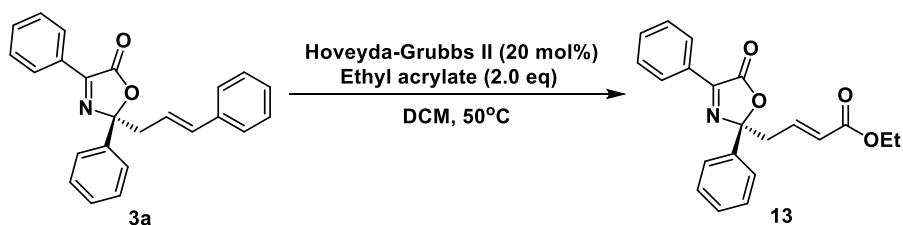

The reaction was proceeded in the glovebox. To a vessel was added a solution of compound (*S*)-2-cinnamyl-2,4-diphenyloxazol-5(2*H*)-one (35 mg, 0.1 mmol) in DCM (1.0 mL) and Hoveyda-Grubbs II catalyst (1.7 mg, 0.02 mmol) to form a dark-red solution. The tube was sealed with a Teflon/rubber cap. To this solution was added ethyl acrylate (22 $\mu\text{L}$ , 0.2 mmol). The resulting solution was heated over 50  $^\circ\text{C}$  for 48 hours. Then, the reaction mixture was cooled to rt. The crude product was purified by column chromatography to give compound **13** (21 mg, 57% yield).

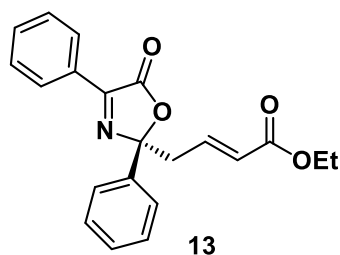

$^1\text{H}$  NMR (500 MHz, Chloroform-*d*)  $\delta$  8.42 – 8.40 (m, 2H), 7.64 – 7.61 (m, 2H), 7.59 – 7.56 (m, 1H), 7.50 (t,  $J = 7.7$  Hz, 2H), 7.43 – 7.36 (m, 3H), 6.72 (dt,  $J = 15.3, 7.5$  Hz, 1H), 5.87 (dd,  $J = 15.4, 1.5$  Hz, 1H), 4.14 (q,  $J = 7.2$  Hz, 2H), 3.17 – 3.05 (m, 2H), 1.24 (t,  $J = 7.1$  Hz, 3H).  $^{13}\text{C}$  NMR (126 MHz, Chloroform-*d*)  $\delta$  164.52, 162.66, 155.30, 137.98, 136.96, 131.79, 128.15, 127.82, 127.79, 127.70, 127.27, 125.90, 124.94, 104.24, 59.46, 43.23, 13.15. HRMS(ESI)  $m/z$ : calculated for  $[\text{C}_{21}\text{H}_{19}\text{NO}_4 + \text{Na}]^+$  372.1212, found 372.1209. HPLC data (Chiralpak AD column, hexane : isopropanol = 90 : 10, 1.0 mL/min),  $t_r = 7.9$  min (major),  $t_r = 10.8$  min (minor), ee = 91%.

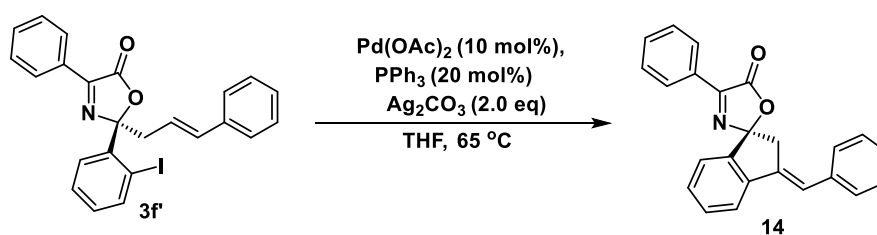

The Pd(OAc)<sub>2</sub> (2.2 mg, 0.01 mmol), PPh<sub>3</sub> (5.2 mg, 0.02 mmol) and Ag<sub>2</sub>CO<sub>3</sub> (0.2 mmol, 2.0 eq) were added to a vial containing a stirring bar under an argon atmosphere. The vial was wrapped with Teflon tape and capped. THF (1.0 mL) and (*S*)-2-cinnamyl-2-(2-iodophenyl)-4-phenyloxazol-5(2*H*)-one (41 mg, 0.1 mmol) were then added using a syringe. The resulting solution was heated at reflux for 16 hours. The solvent was removed and the product was purified by column chromatography on silica gel, eluent (PE: EA=100:1), product as a yellow solid (19 mg, 55% yield).

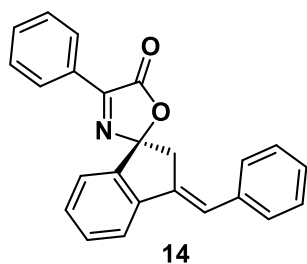

$^1\text{H}$  NMR (500 MHz, Chloroform-*d*)  $\delta$  8.46 – 8.44 (m, 2H), 7.76 (d,  $J = 7.9$  Hz, 1H), 7.59 (t,  $J = 7.5$  Hz, 1H), 7.50 (q,  $J = 7.9$  Hz, 3H), 7.44 (d,  $J = 7.8$  Hz, 2H), 7.38 (t,  $J = 7.6$  Hz, 2H), 7.31 (t,  $J = 7.5$  Hz, 1H), 7.27 (d,  $J = 7.2$  Hz, 1H), 7.17 (d,  $J = 2.5$  Hz, 1H), 7.03 (d,  $J = 7.7$  Hz, 1H), 3.77 – 3.61 (m, 2H).  $^{13}\text{C}$  NMR (126 MHz, Chloroform-*d*)  $\delta$  163.41, 154.75, 142.04, 136.96, 135.89, 135.23, 131.79, 130.00, 128.07, 127.90, 127.85, 127.66, 127.64, 127.28, 126.36, 122.28, 121.32, 119.91, 109.23, 41.27. HRMS(ESI)  $m/z$ : calculated for  $[\text{C}_{24}\text{H}_{17}\text{NO}_2 + \text{Na}]^+$  374.1157, found 374.1153. HPLC data (Chiralpak AD column, hexane : isopropanol = 90 : 10, 1.0 mL/min),  $t_r = 15.5$  min (major),  $t_r = 18.4$  min (minor), ee = 83%.

## References

- [1] M. Hayashi; L. E. Brown; J. A. P. Jr. *J. Am. Chem. Soc.* **2016**, 138, 13103-13106.
- [2] D. K. Kahlon; T. A. Lansdell; J. S. Fisk; C. D. Hupp; T. L. Friebe; S. Hovde; A. D. Jones; R. D. Dyer; R. W. Henry; J. J. Tepe. *J. Med. Chem.* **2009**, 52, 1302-1309.
- [3] A. J. Ndakala; M. Hashemzadeh; R. C. So; A. R. Howell. *Org. Lett.* **2002**, 4, 1719–1722.



## Single X-ray structure data of chiral 3j

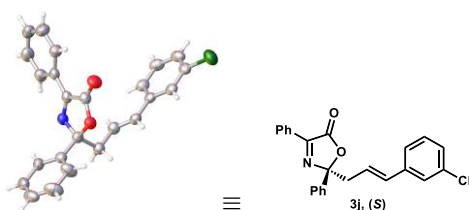

**Table 1 Crystal data and structure refinement for cu\_20181219LMF\_0m\_a.**

|                                             |                                                               |
|---------------------------------------------|---------------------------------------------------------------|
| Identification code                         | cu_20181219LMF_0m_a                                           |
| Empirical formula                           | C <sub>24</sub> H <sub>18</sub> ClNO <sub>2</sub>             |
| Formula weight                              | 387.84                                                        |
| Temperature/K                               | 296(2)                                                        |
| Crystal system                              | orthorhombic                                                  |
| Space group                                 | P2 <sub>1</sub> 2 <sub>1</sub> 2 <sub>1</sub>                 |
| a/Å                                         | 6.0263(5)                                                     |
| b/Å                                         | 16.9680(14)                                                   |
| c/Å                                         | 18.8850(16)                                                   |
| α/°                                         | 90                                                            |
| β/°                                         | 90                                                            |
| γ/°                                         | 90                                                            |
| Volume/Å <sup>3</sup>                       | 1931.1(3)                                                     |
| Z                                           | 4                                                             |
| ρ <sub>calc</sub> /cm <sup>3</sup>          | 1.334                                                         |
| μ/mm <sup>-1</sup>                          | 1.904                                                         |
| F(000)                                      | 808.0                                                         |
| Crystal size/mm <sup>3</sup>                | 0.220 × 0.190 × 0.160                                         |
| Radiation                                   | CuKα (λ = 1.54178)                                            |
| 2θ range for data collection/°              | 7.004 to 130.97                                               |
| Index ranges                                | -6 ≤ h ≤ 7, -20 ≤ k ≤ 20, -22 ≤ l ≤ 22                        |
| Reflections collected                       | 10368                                                         |
| Independent reflections                     | 3213 [R <sub>int</sub> = 0.0498, R <sub>sigma</sub> = 0.0556] |
| Data/restraints/parameters                  | 3213/0/253                                                    |
| Goodness-of-fit on F <sup>2</sup>           | 1.092                                                         |
| Final R indexes [I >= 2σ (I)]               | R <sub>1</sub> = 0.0475, wR <sub>2</sub> = 0.1185             |
| Final R indexes [all data]                  | R <sub>1</sub> = 0.0491, wR <sub>2</sub> = 0.1205             |
| Largest diff. peak/hole / e Å <sup>-3</sup> | 0.34/-0.37                                                    |
| Flack parameter                             | 0.031(10)                                                     |

**Table 2 Fractional Atomic Coordinates ( $\times 10^4$ ) and Equivalent Isotropic Displacement Parameters ( $\text{\AA}^2 \times 10^3$ ) for cu\_20181219LMF\_0m\_a.  $U_{\text{eq}}$  is defined as 1/3 of of the trace of the orthogonalised  $U_{ij}$  tensor.**

| Atom | <i>x</i>   | <i>y</i>   | <i>z</i>   | $U(\text{eq})$ |
|------|------------|------------|------------|----------------|
| Cl1  | 3089.6(19) | 6950.5(6)  | 2965.4(4)  | 71.1(3)        |
| O2   | 580(3)     | 5517.4(11) | 6577.1(10) | 44.4(4)        |
| O1   | 227(4)     | 4692.7(14) | 5659.3(12) | 58.4(6)        |
| N1   | 3820(4)    | 4995.0(12) | 7059.1(12) | 38.8(5)        |
| C11  | 1175(5)    | 5643.0(14) | 7843.2(14) | 40.1(6)        |
| C10  | 2261(4)    | 5641.8(14) | 7123.3(14) | 38.7(5)        |
| C6   | 4960(5)    | 6572.3(12) | 4966.5(14) | 38.2(5)        |
| C23  | 3262(4)    | 4571.9(14) | 6530.1(13) | 38.5(5)        |
| C9   | 3430(5)    | 6432.6(15) | 6954.7(15) | 44.0(6)        |
| C24  | 1202(5)    | 4897.4(15) | 6177.6(15) | 41.4(6)        |
| C22  | 4456(5)    | 3857.7(15) | 6313.3(14) | 40.7(6)        |
| C2   | 7978(5)    | 6184.9(17) | 4204.2(18) | 51.1(7)        |
| C12  | 2250(5)    | 5344.2(15) | 8425.5(16) | 48.2(7)        |
| C5   | 3789(4)    | 6802.8(14) | 4369.3(14) | 40.6(6)        |
| C8   | 4678(5)    | 6399.9(15) | 6272.9(16) | 44.9(6)        |
| C7   | 3897(5)    | 6644.2(14) | 5661.8(15) | 40.9(6)        |
| C17  | 6492(5)    | 3691.5(18) | 6629.4(16) | 50.1(7)        |
| C1   | 7098(5)    | 6261.8(14) | 4874.8(17) | 44.8(6)        |
| C3   | 6794(6)    | 6402.5(17) | 3610.8(16) | 52.0(7)        |
| C21  | 3612(6)    | 3333.3(17) | 5819.1(17) | 53.8(7)        |
| C4   | 4681(5)    | 6707.4(15) | 3703.9(15) | 46.6(6)        |
| C16  | -900(6)    | 5979(2)    | 7930.8(19) | 63.6(9)        |
| C13  | 1283(8)    | 5376.4(17) | 9093.7(16) | 60.8(9)        |
| C20  | 4752(8)    | 2649.4(19) | 5661(2)    | 67.1(10)       |

|     |          |            |            |          |
|-----|----------|------------|------------|----------|
| C19 | 6742(7)  | 2484.5(19) | 5985.4(19) | 63.6(10) |
| C14 | -780(7)  | 5705.0(19) | 9173.1(18) | 62.5(9)  |
| C15 | -1860(6) | 6001(3)    | 8602(2)    | 74.7(11) |
| C18 | 7612(6)  | 3009(2)    | 6469(2)    | 60.9(8)  |

**Table 3 Anisotropic Displacement Parameters ( $\text{\AA}^2 \times 10^3$ ) for cu\_20181219LMF\_0m\_a. The Anisotropic displacement factor exponent takes the form:  $-2\pi^2[h^2a^*U_{11}+2hka^*b^*U_{12}+\dots]$ .**

| Atom | U <sub>11</sub> | U <sub>22</sub> | U <sub>33</sub> | U <sub>23</sub> | U <sub>13</sub> | U <sub>12</sub> |
|------|-----------------|-----------------|-----------------|-----------------|-----------------|-----------------|
| Cl1  | 78.6(6)         | 87.8(6)         | 46.8(4)         | 5.5(4)          | -6.2(4)         | -4.7(5)         |
| O2   | 38.6(9)         | 51.7(9)         | 43.0(10)        | 1.4(8)          | -6.7(8)         | 8.3(8)          |
| O1   | 53.5(13)        | 70.7(13)        | 50.9(12)        | -7.8(10)        | -18.4(11)       | 6.9(10)         |
| N1   | 35.7(10)        | 43.3(10)        | 37.4(10)        | 3.8(8)          | -0.9(10)        | 3.9(9)          |
| C11  | 39.2(13)        | 39.6(11)        | 41.4(13)        | -1.8(10)        | 1.0(11)         | -2.6(10)        |
| C10  | 35.5(12)        | 41.6(12)        | 38.9(12)        | -0.1(10)        | -4.5(11)        | 5.4(10)         |
| C6   | 39.5(12)        | 29.9(10)        | 45.3(14)        | -2.4(9)         | 3.6(12)         | -4.1(9)         |
| C23  | 36.5(12)        | 42.7(11)        | 36.2(12)        | 7.2(10)         | 2.6(11)         | 1.0(10)         |
| C9   | 43.8(13)        | 44.3(12)        | 43.8(13)        | 2.2(10)         | 1.5(12)         | -0.2(11)        |
| C24  | 35.8(12)        | 46.7(12)        | 41.6(13)        | 2.6(10)         | -2.4(12)        | -0.3(11)        |
| C22  | 44.2(14)        | 43.2(11)        | 34.5(12)        | 7.1(9)          | 4.9(11)         | 3.3(11)         |
| C2   | 39.0(14)        | 49.3(13)        | 64.9(18)        | -11.8(13)       | 8.8(15)         | -2.4(12)        |
| C12  | 59.7(17)        | 41.8(12)        | 43.1(14)        | 4.9(11)         | 1.8(14)         | 5.2(12)         |
| C5   | 38.6(12)        | 35.3(11)        | 47.8(14)        | -0.7(9)         | 4.3(12)         | -4.8(10)        |
| C8   | 40.2(13)        | 45.9(11)        | 48.7(15)        | 2.2(11)         | 3.2(12)         | 0.9(11)         |
| C7   | 38.2(12)        | 37.1(10)        | 47.5(14)        | -1.3(10)        | 5.0(12)         | 4.0(10)         |
| C17  | 49.0(15)        | 56.9(15)        | 44.4(14)        | 2.1(12)         | 2.3(13)         | 9.9(12)         |
| C1   | 38.2(13)        | 42.3(12)        | 54.0(16)        | -4.4(11)        | -2.0(13)        | -0.4(10)        |

|     |          |          |          |           |          |           |
|-----|----------|----------|----------|-----------|----------|-----------|
| C3  | 54.7(16) | 51.1(13) | 50.2(16) | -10.3(12) | 16.3(15) | -12.2(14) |
| C21 | 60.5(18) | 48.6(14) | 52.4(15) | -0.8(13)  | -4.7(16) | 5.2(13)   |
| C4  | 53.0(15) | 40.9(11) | 45.9(15) | -3.0(11)  | 1.9(13)  | -11.0(12) |
| C16 | 44.2(16) | 96(2)    | 51.0(17) | -9.8(17)  | 2.5(16)  | 14.2(16)  |
| C13 | 96(3)    | 45.2(14) | 41.0(15) | 5.7(11)   | 9.1(18)  | -4.5(15)  |
| C20 | 92(3)    | 48.6(15) | 61(2)    | -8.2(13)  | -3(2)    | 5.4(17)   |
| C19 | 81(3)    | 50.9(15) | 59.3(18) | 5.5(13)   | 17.9(19) | 24.7(16)  |
| C14 | 76(2)    | 60.7(17) | 51.0(17) | -12.5(14) | 22.7(18) | -23.3(17) |
| C15 | 47.7(17) | 105(3)   | 72(2)    | -26(2)    | 12.9(19) | 3(2)      |
| C18 | 55.8(18) | 66.1(17) | 60.8(19) | 8.6(15)   | 2.3(16)  | 21.0(15)  |

**Table 4 Bond Lengths for cu\_20181219LMF\_0m\_a.**

| Atom | Atom | Length/Å | Atom | Atom | Length/Å |
|------|------|----------|------|------|----------|
| C11  | C4   | 1.742(3) | C22  | C21  | 1.386(4) |
| O2   | C24  | 1.348(3) | C22  | C17  | 1.393(4) |
| O2   | C10  | 1.461(3) | C2   | C3   | 1.379(5) |
| O1   | C24  | 1.193(4) | C2   | C1   | 1.379(5) |
| N1   | C23  | 1.275(4) | C12  | C13  | 1.391(5) |
| N1   | C10  | 1.450(3) | C5   | C4   | 1.376(4) |
| C11  | C12  | 1.373(4) | C8   | C7   | 1.313(4) |
| C11  | C16  | 1.385(5) | C17  | C18  | 1.375(4) |
| C11  | C10  | 1.509(4) | C3   | C4   | 1.386(5) |
| C10  | C9   | 1.549(4) | C21  | C20  | 1.381(5) |
| C6   | C5   | 1.387(4) | C16  | C15  | 1.393(5) |
| C6   | C1   | 1.403(4) | C13  | C14  | 1.371(6) |
| C6   | C7   | 1.466(4) | C20  | C19  | 1.375(6) |

|     |     |          |     |     |          |
|-----|-----|----------|-----|-----|----------|
| C23 | C22 | 1.468(4) | C19 | C18 | 1.379(6) |
| C23 | C24 | 1.513(4) | C14 | C15 | 1.357(6) |
| C9  | C8  | 1.492(4) |     |     |          |

**Table 5 Bond Angles for cu\_20181219LMF\_0m\_a.**

| Atom | Atom | Atom | Angle/°    | Atom | Atom | Atom | Angle/°  |
|------|------|------|------------|------|------|------|----------|
| C24  | O2   | C10  | 108.37(19) | C21  | C22  | C23  | 122.5(3) |
| C23  | N1   | C10  | 108.7(2)   | C17  | C22  | C23  | 118.6(3) |
| C12  | C11  | C16  | 118.8(3)   | C3   | C2   | C1   | 121.5(3) |
| C12  | C11  | C10  | 121.1(3)   | C11  | C12  | C13  | 121.0(3) |
| C16  | C11  | C10  | 120.0(3)   | C4   | C5   | C6   | 120.7(3) |
| N1   | C10  | O2   | 106.3(2)   | C7   | C8   | C9   | 124.5(3) |
| N1   | C10  | C11  | 110.9(2)   | C8   | C7   | C6   | 127.2(2) |
| O2   | C10  | C11  | 109.6(2)   | C18  | C17  | C22  | 120.6(3) |
| N1   | C10  | C9   | 110.1(2)   | C2   | C1   | C6   | 120.1(3) |
| O2   | C10  | C9   | 107.2(2)   | C2   | C3   | C4   | 118.2(3) |
| C11  | C10  | C9   | 112.4(2)   | C20  | C21  | C22  | 120.1(3) |
| C5   | C6   | C1   | 118.2(3)   | C5   | C4   | C3   | 121.2(3) |
| C5   | C6   | C7   | 118.9(2)   | C5   | C4   | C11  | 119.2(2) |
| C1   | C6   | C7   | 122.9(3)   | C3   | C4   | C11  | 119.5(2) |
| N1   | C23  | C22  | 123.6(2)   | C11  | C16  | C15  | 119.7(4) |
| N1   | C23  | C24  | 110.8(2)   | C14  | C13  | C12  | 119.7(3) |
| C22  | C23  | C24  | 125.5(2)   | C19  | C20  | C21  | 120.5(3) |
| C8   | C9   | C10  | 112.0(2)   | C20  | C19  | C18  | 119.7(3) |
| O1   | C24  | O2   | 123.3(3)   | C15  | C14  | C13  | 119.9(3) |
| O1   | C24  | C23  | 131.2(3)   | C14  | C15  | C16  | 120.9(4) |

|     |     |     |          |     |     |     |          |
|-----|-----|-----|----------|-----|-----|-----|----------|
| O2  | C24 | C23 | 105.5(2) | C17 | C18 | C19 | 120.2(3) |
| C21 | C22 | C17 | 118.8(3) |     |     |     |          |

**Table 6 Hydrogen Atom Coordinates ( $\text{\AA} \times 10^4$ ) and Isotropic Displacement Parameters ( $\text{\AA}^2 \times 10^3$ ) for cu\_20181219LMF\_0m\_a.**

| Atom | x        | y       | z       | U(eq) |
|------|----------|---------|---------|-------|
| H9A  | 2328.48  | 6848.46 | 6929.28 | 53    |
| H9B  | 4448.82  | 6560.24 | 7335.49 | 53    |
| H2   | 9401.91  | 5981.89 | 4151.11 | 61    |
| H12  | 3644.59  | 5117.09 | 8372.37 | 58    |
| H5   | 2386.06  | 7024.25 | 4418.91 | 49    |
| H8   | 6105.53  | 6192.23 | 6281.23 | 54    |
| H7   | 2518.32  | 6890.05 | 5671.21 | 49    |
| H17  | 7097.56  | 4045.59 | 6951.82 | 60    |
| H1   | 7923.65  | 6107.37 | 5267.01 | 54    |
| H3   | 7397.4   | 6346.15 | 3160.35 | 62    |
| H21  | 2274.35  | 3442.14 | 5593.54 | 65    |
| H16  | -1648.48 | 6189.91 | 7543.95 | 76    |
| H13  | 2033.13  | 5176.08 | 9484.69 | 73    |
| H20  | 4170.04  | 2297.6  | 5332.04 | 81    |
| H19  | 7497.03  | 2021.36 | 5879.15 | 76    |
| H14  | -1438.74 | 5725    | 9618.13 | 75    |
| H15  | -3261.93 | 6221.54 | 8658.55 | 90    |
| H18  | 8961.47  | 2900.43 | 6687.44 | 73    |

Spectral Data

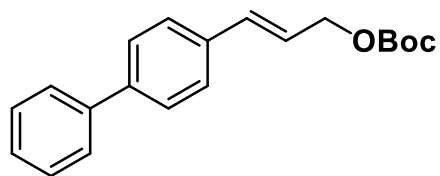

1f

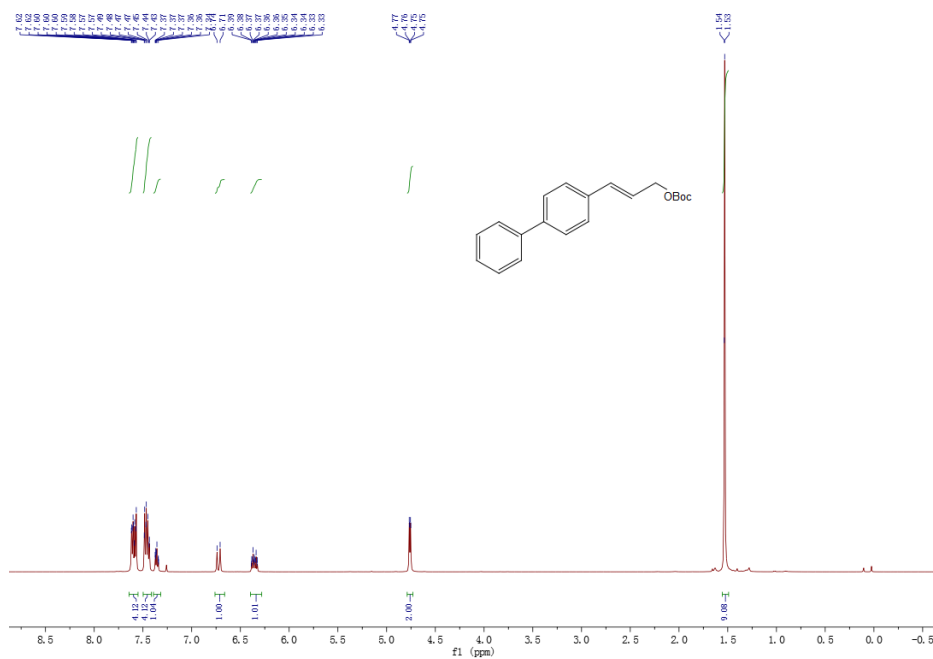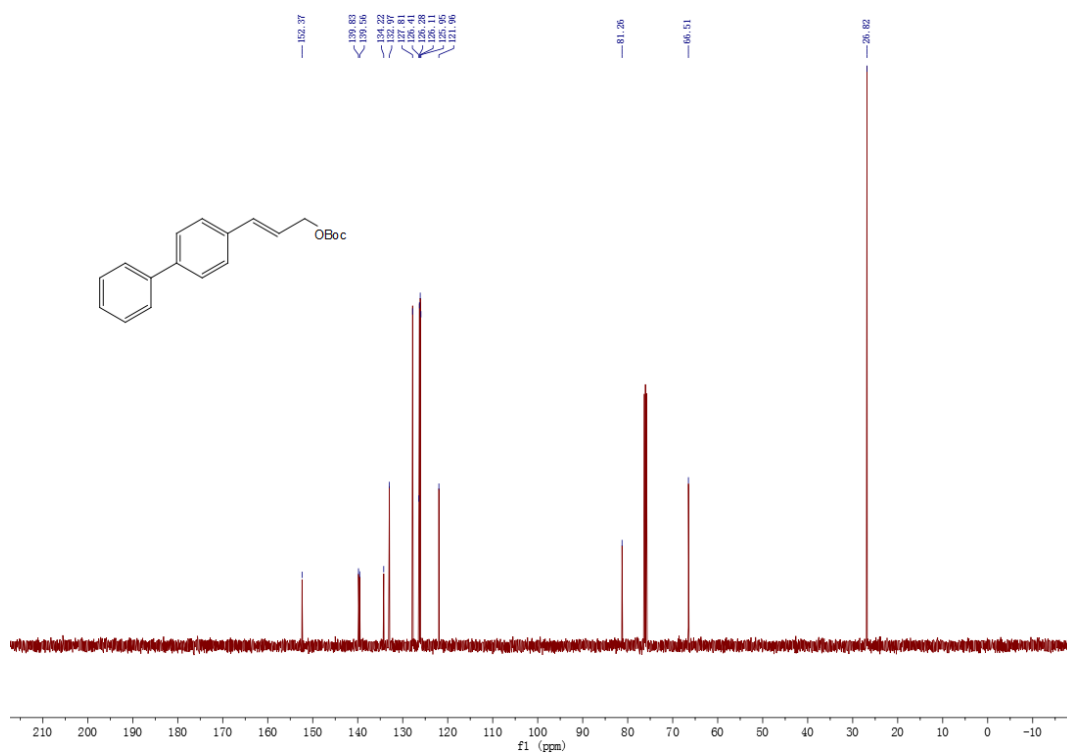

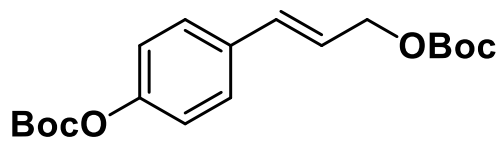

**1g**

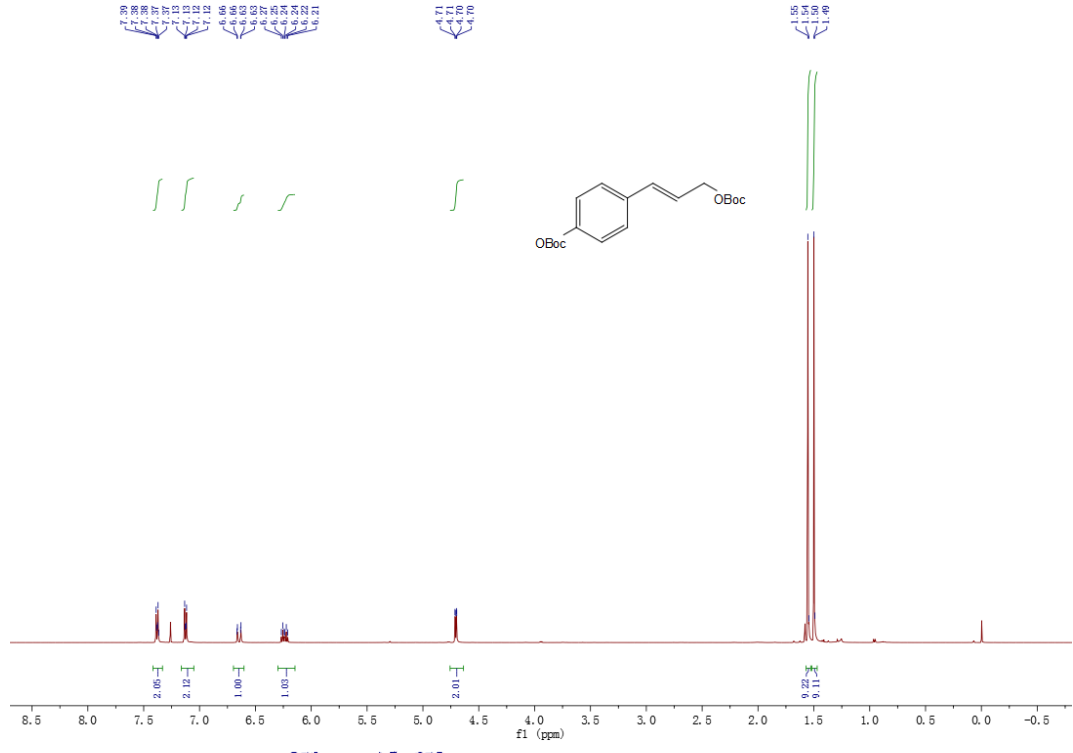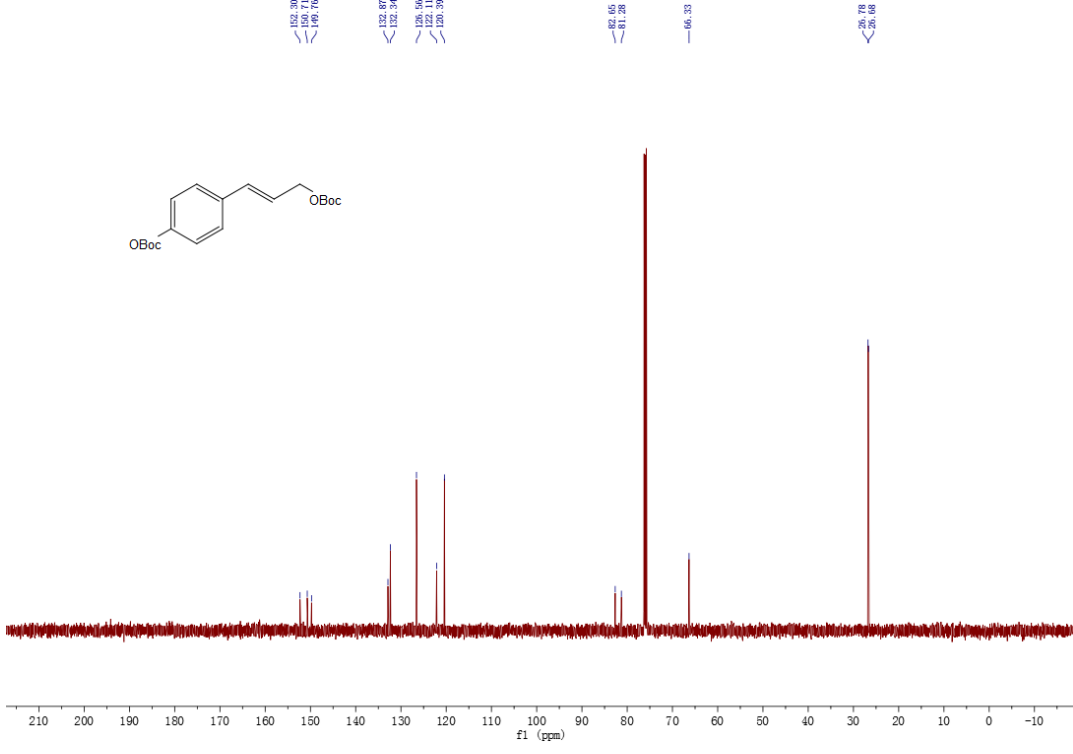



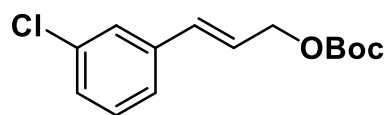

1j

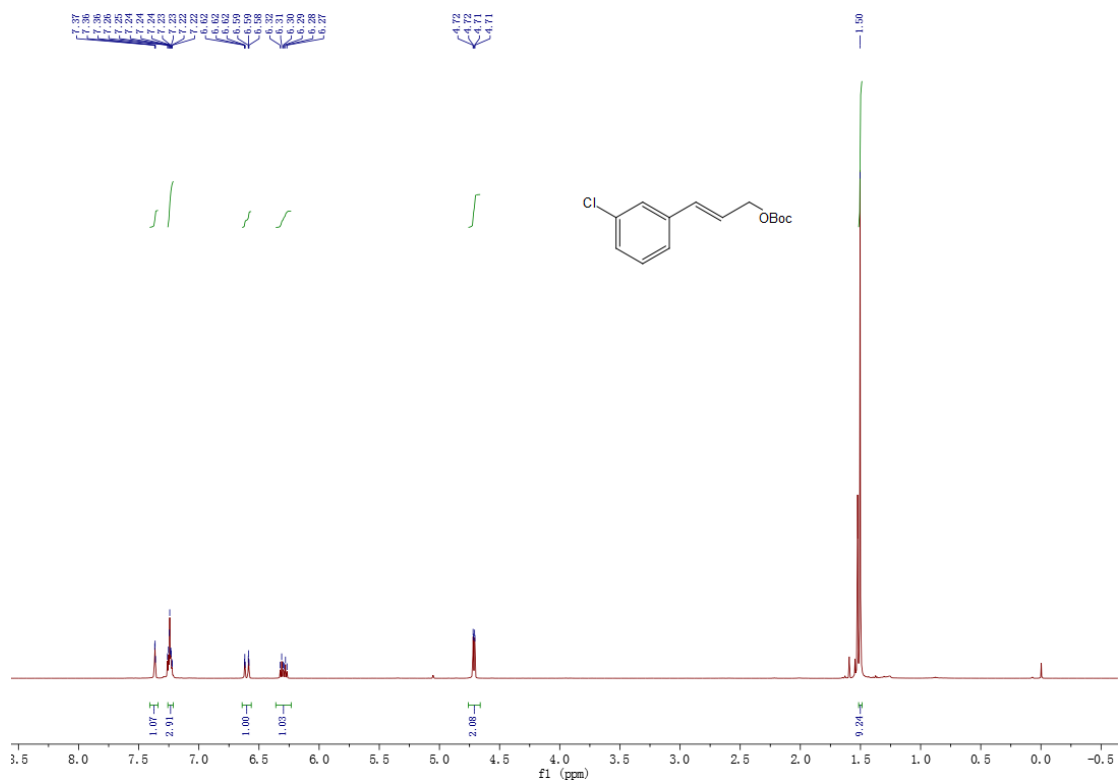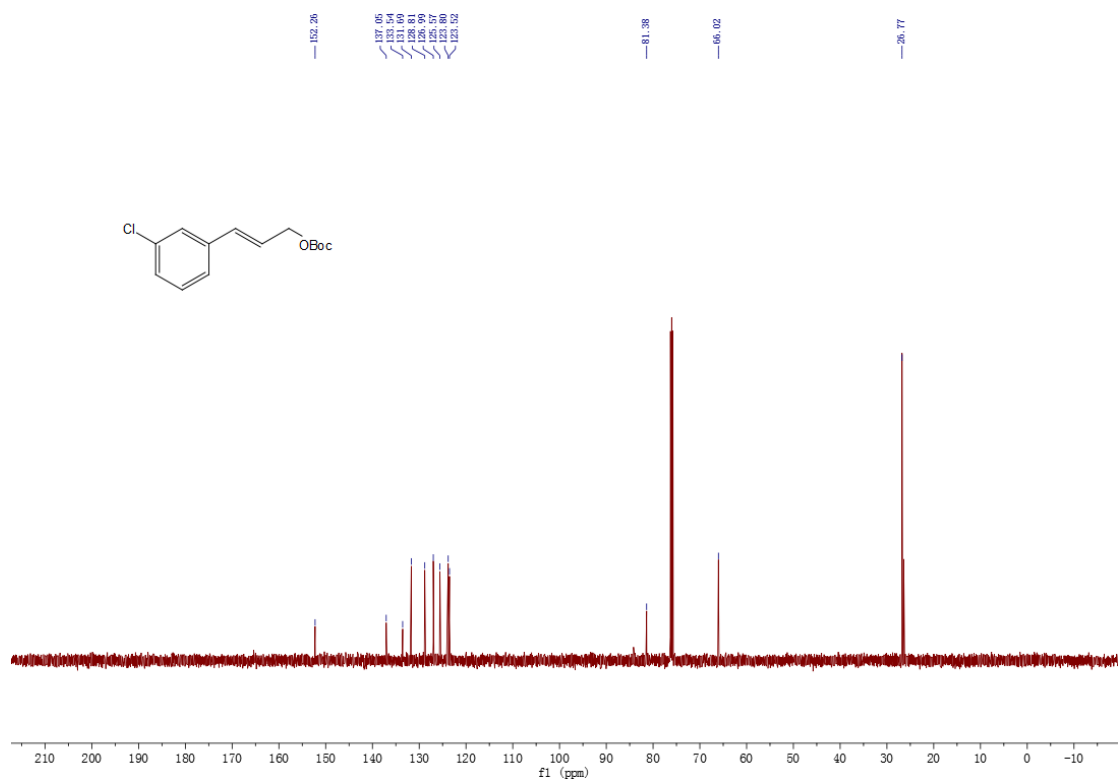

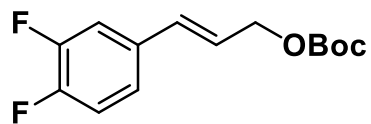

1k

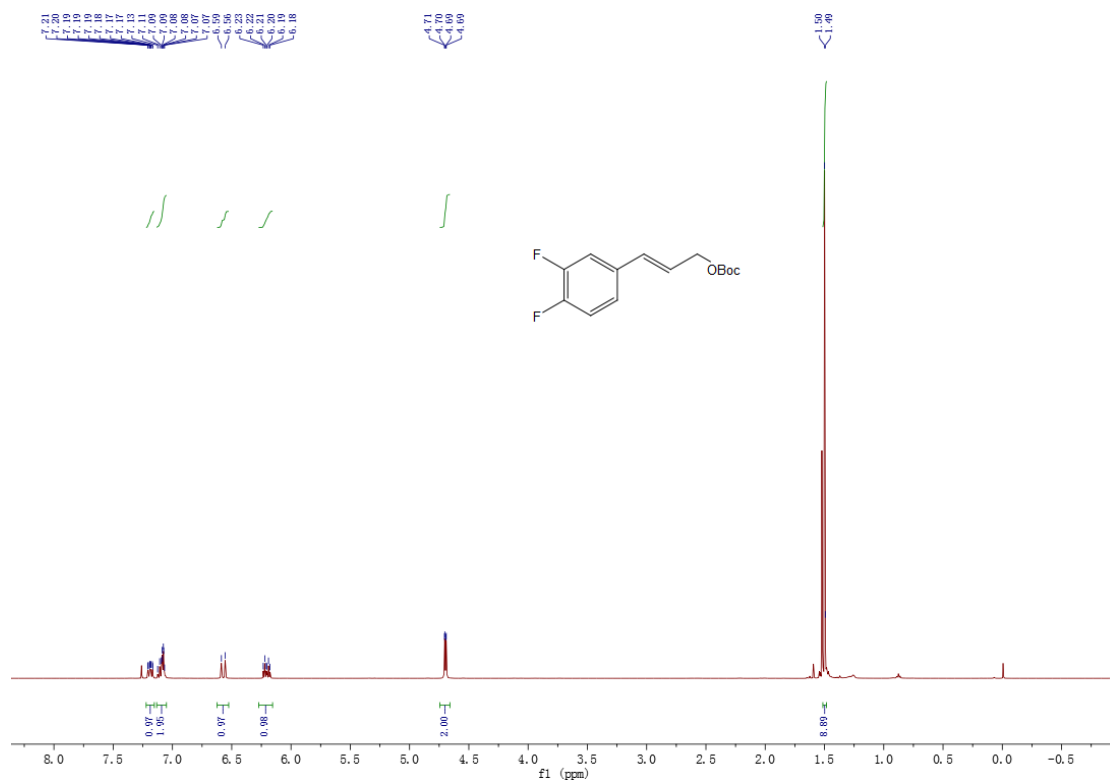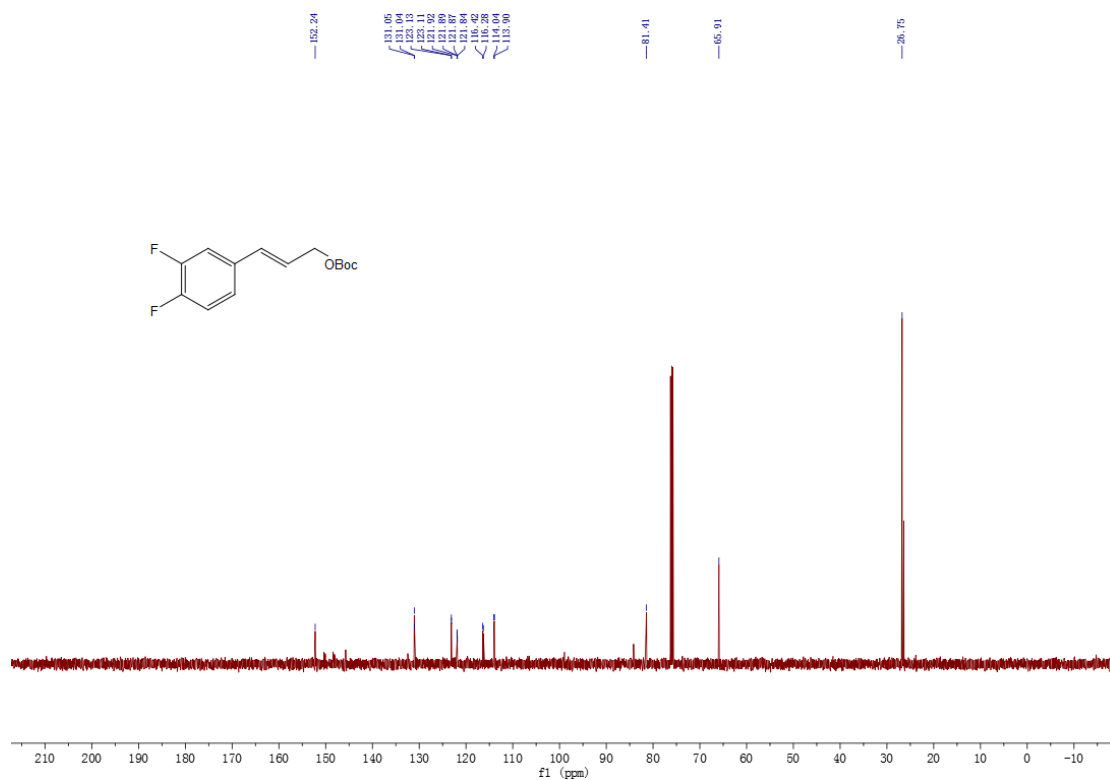

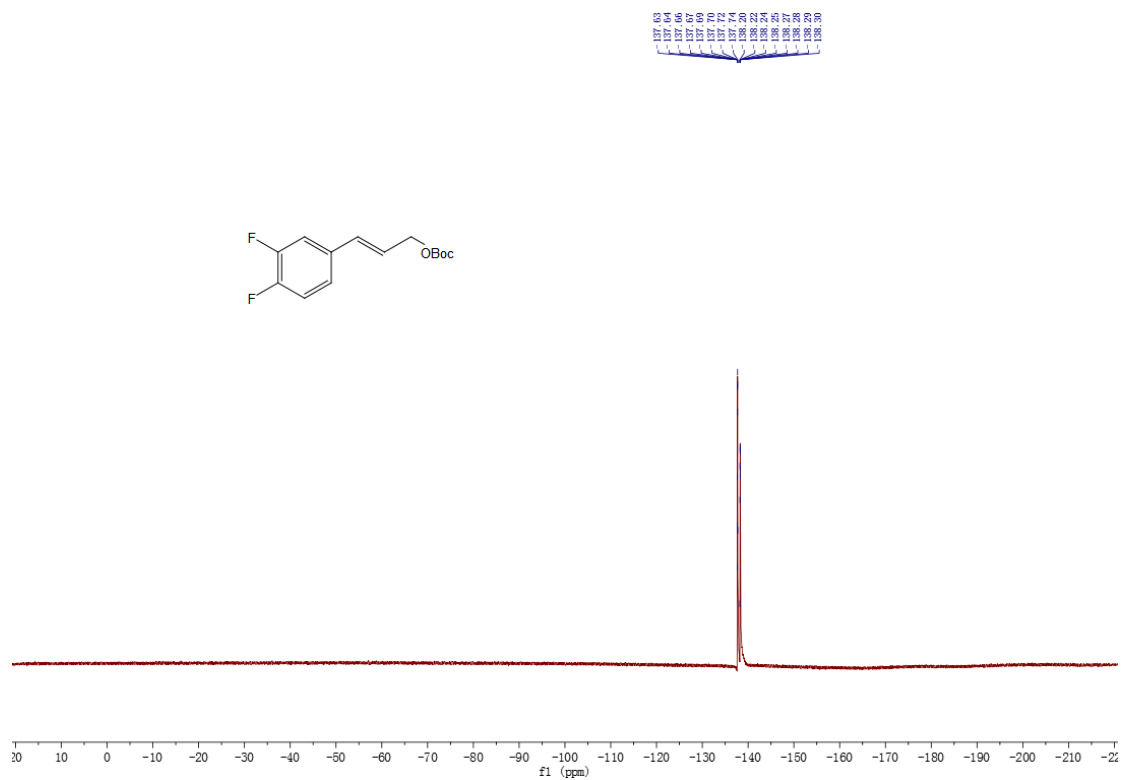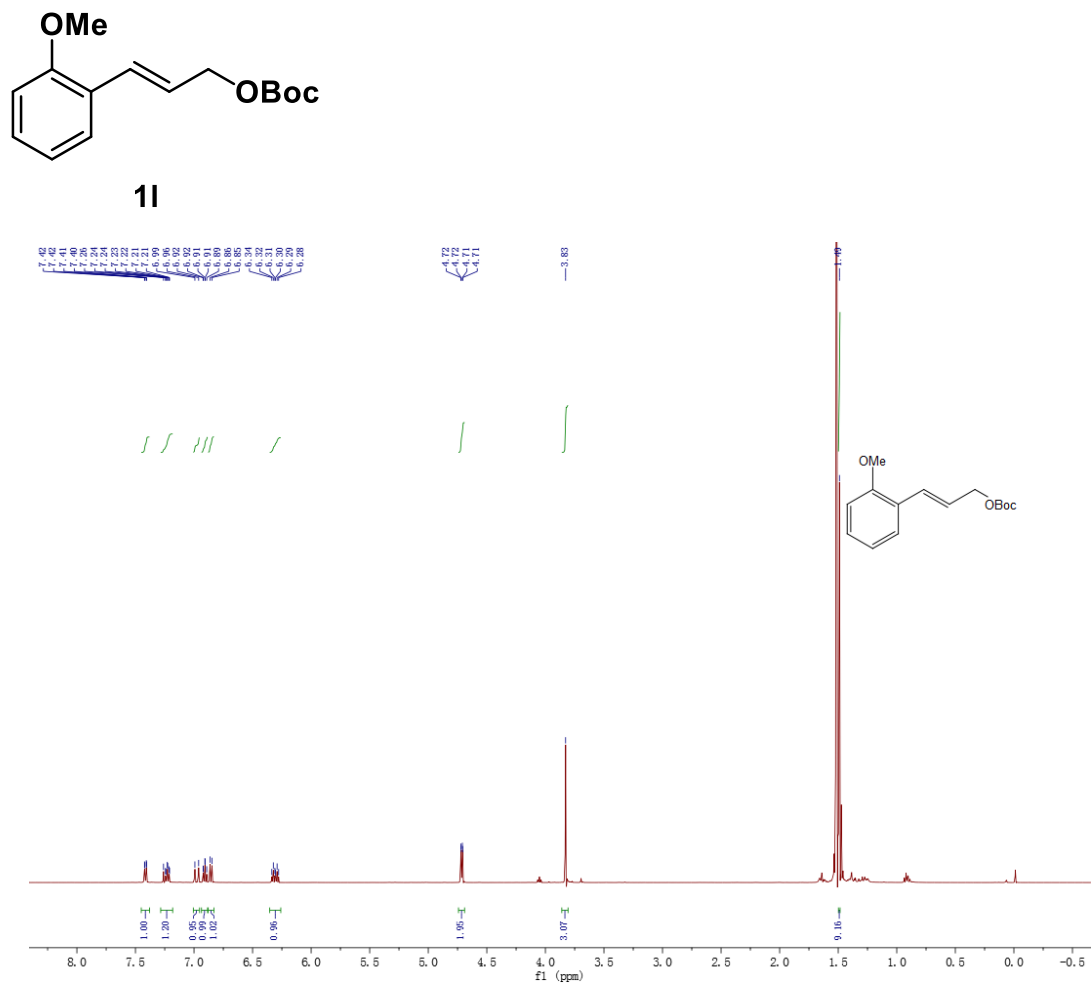

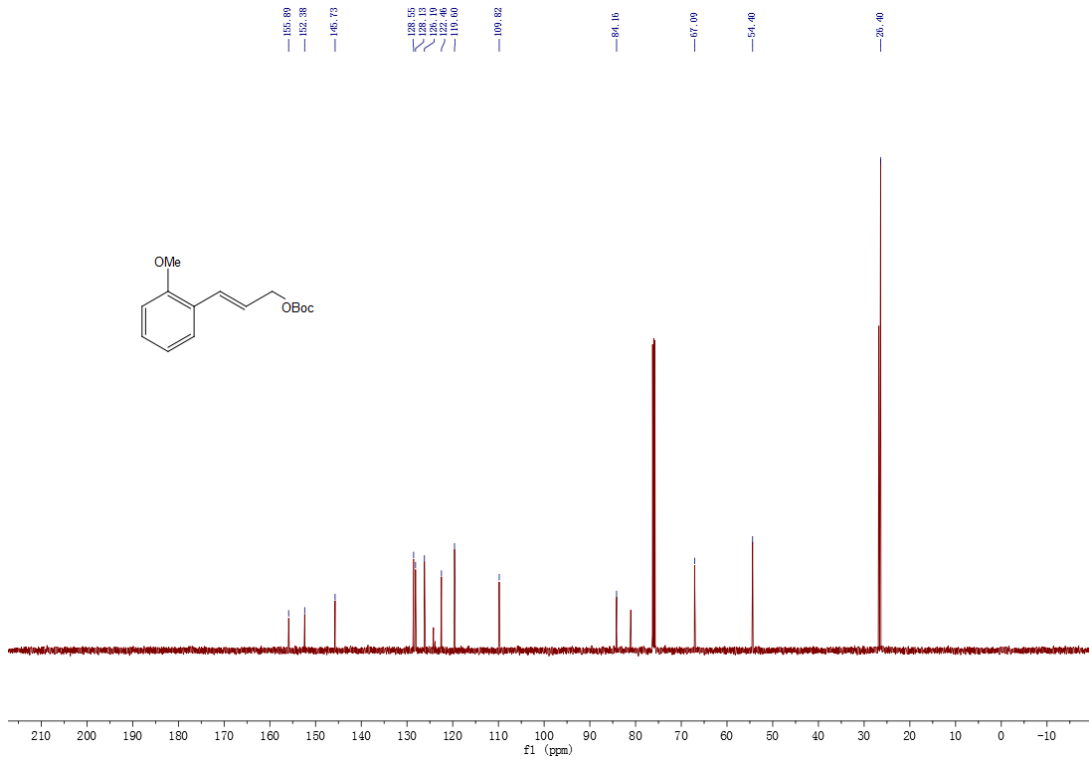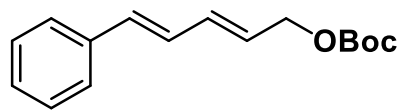

1r

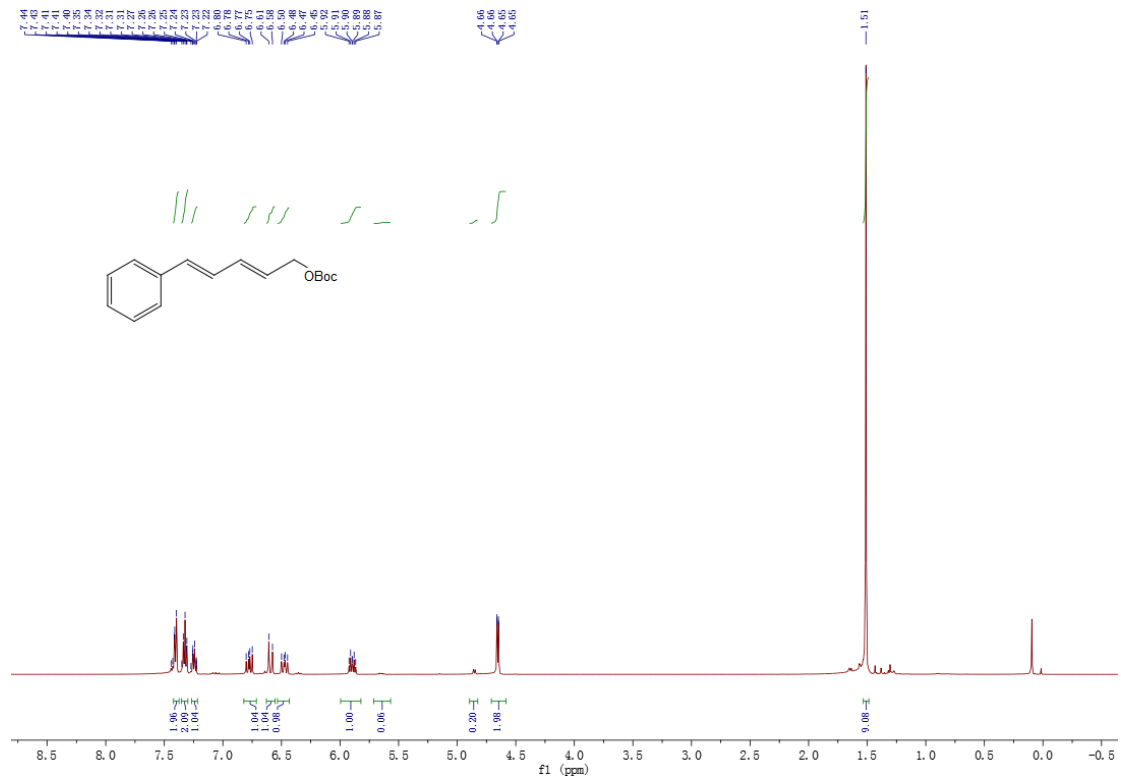

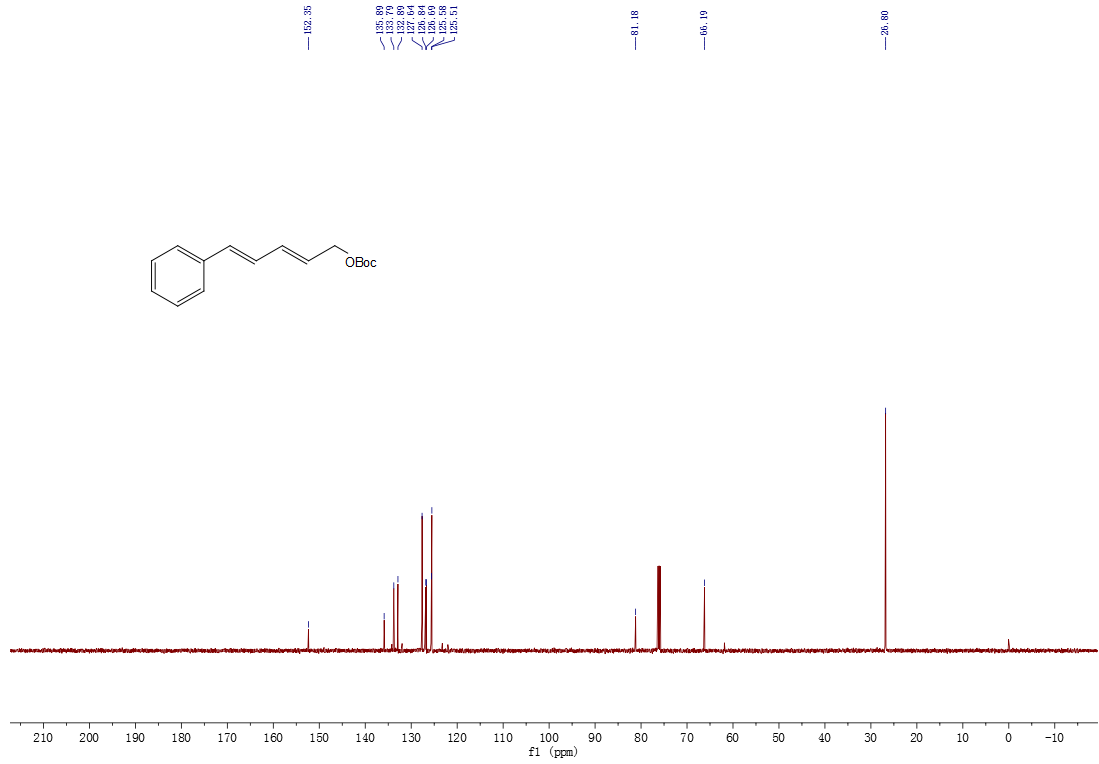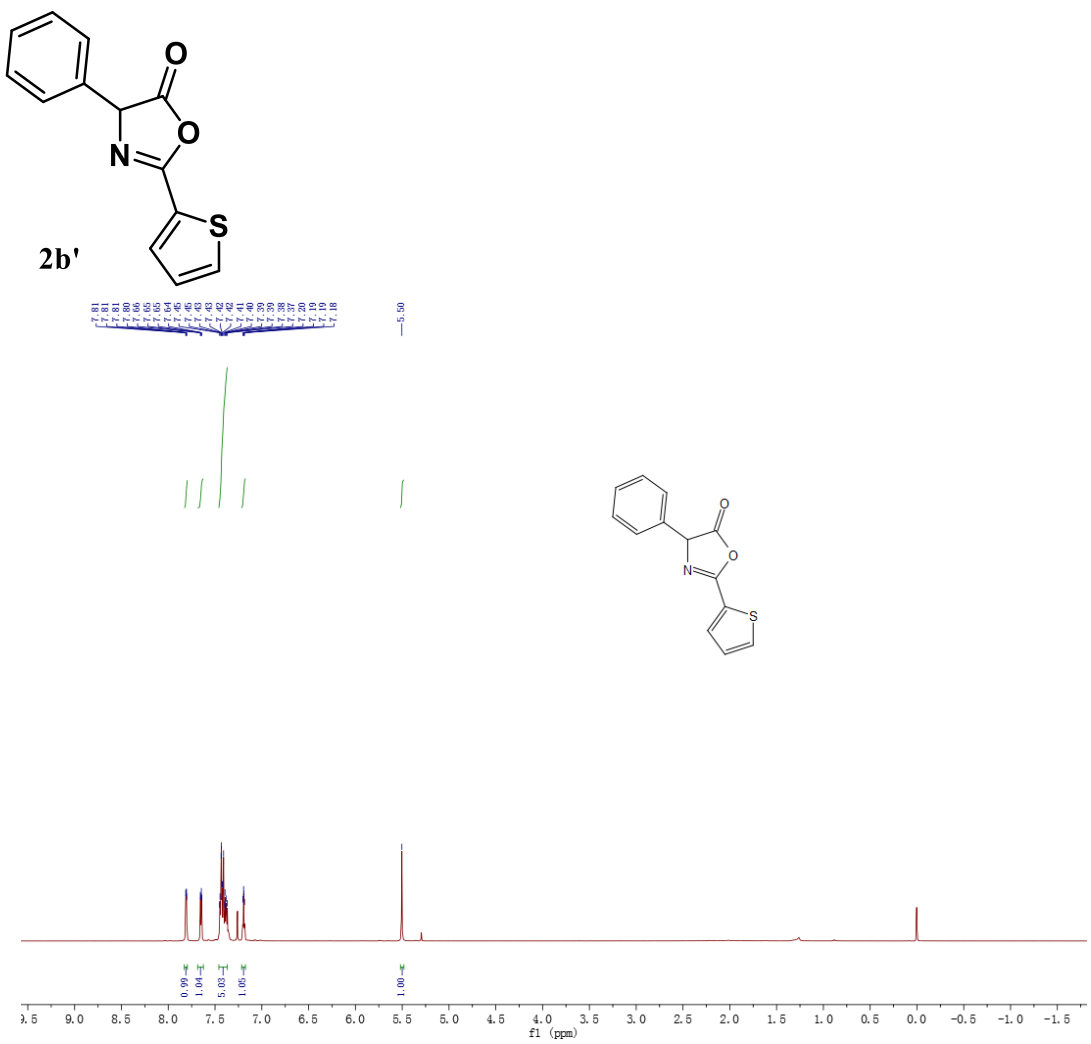

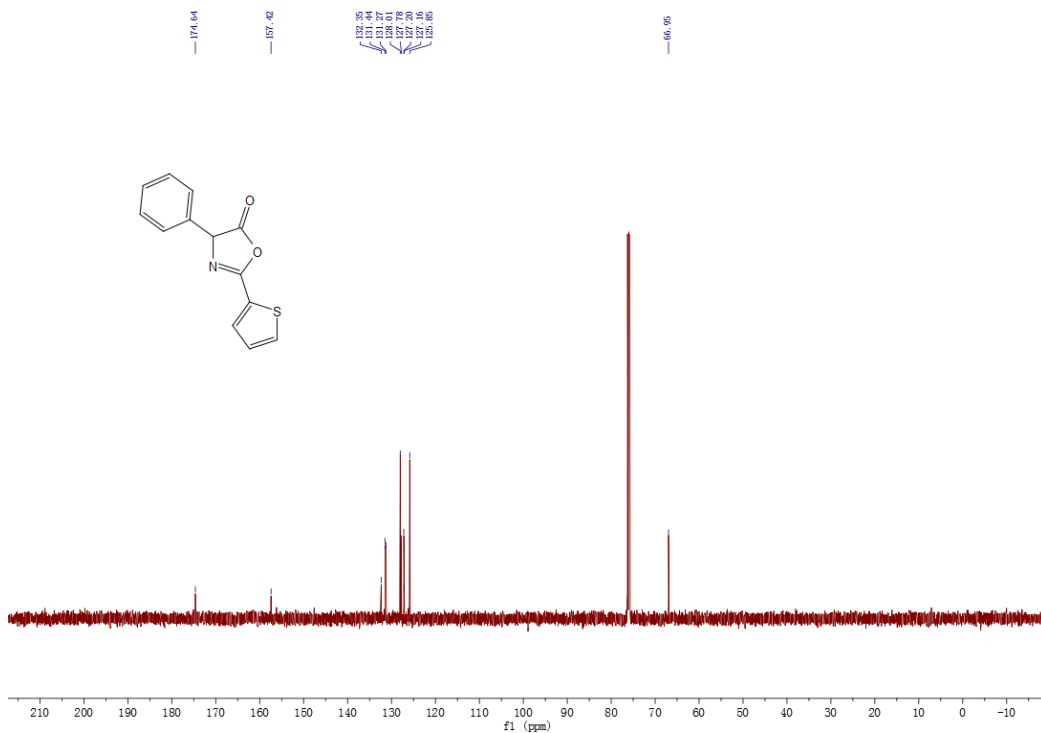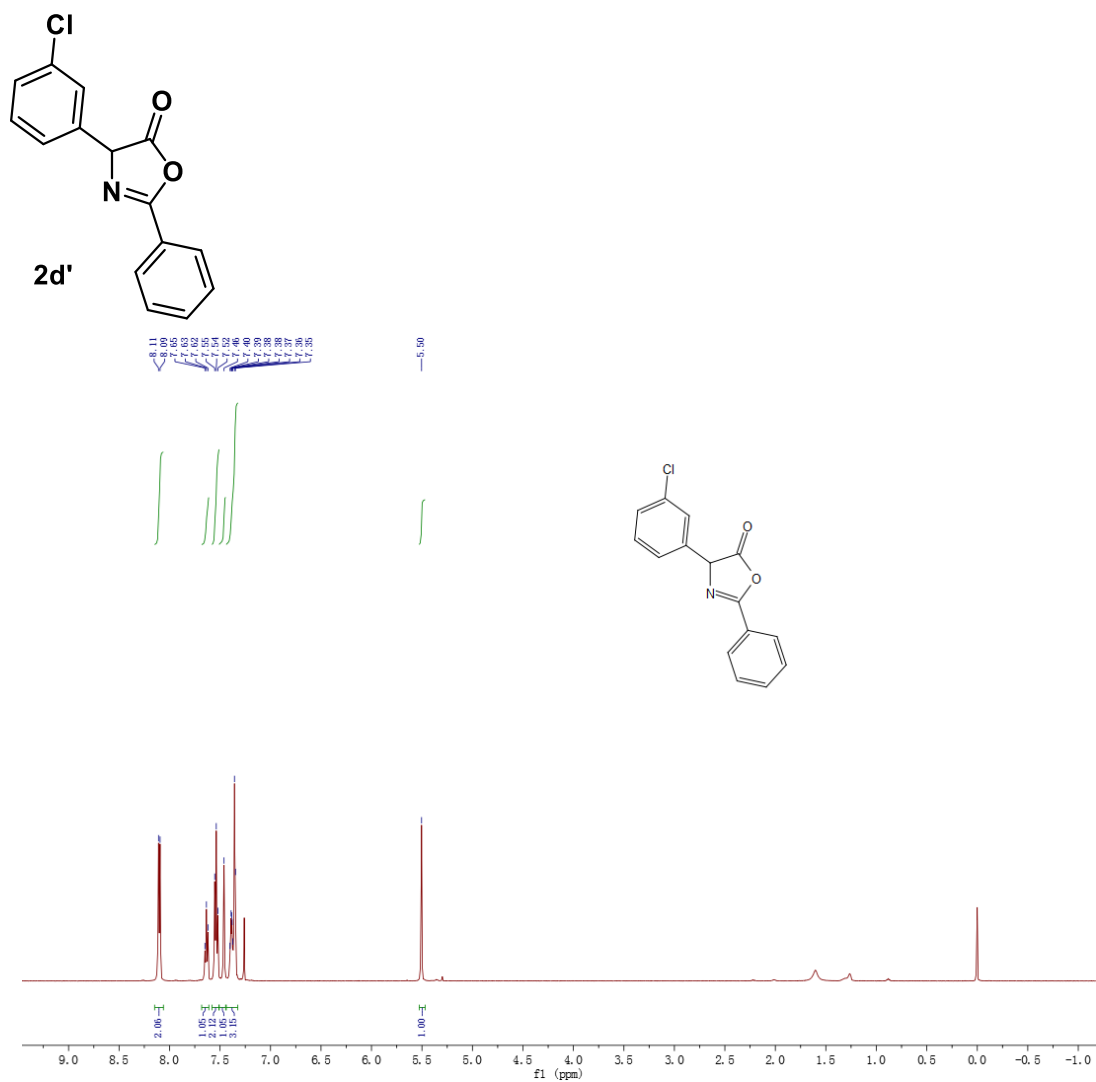

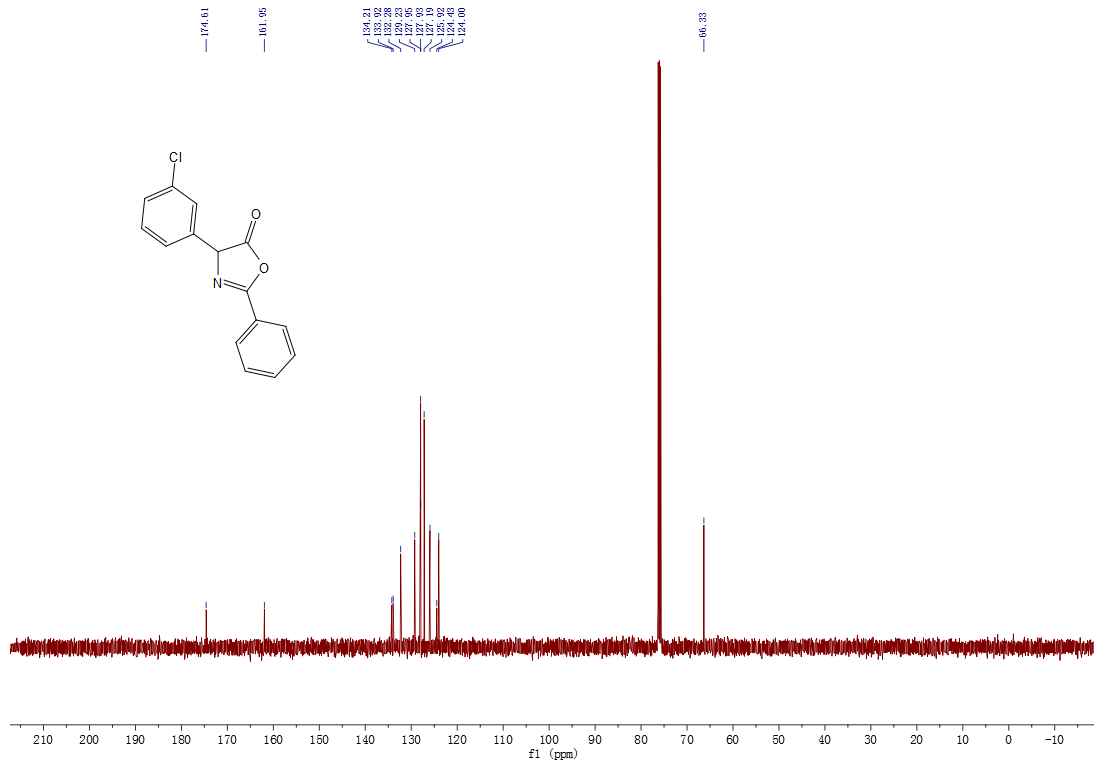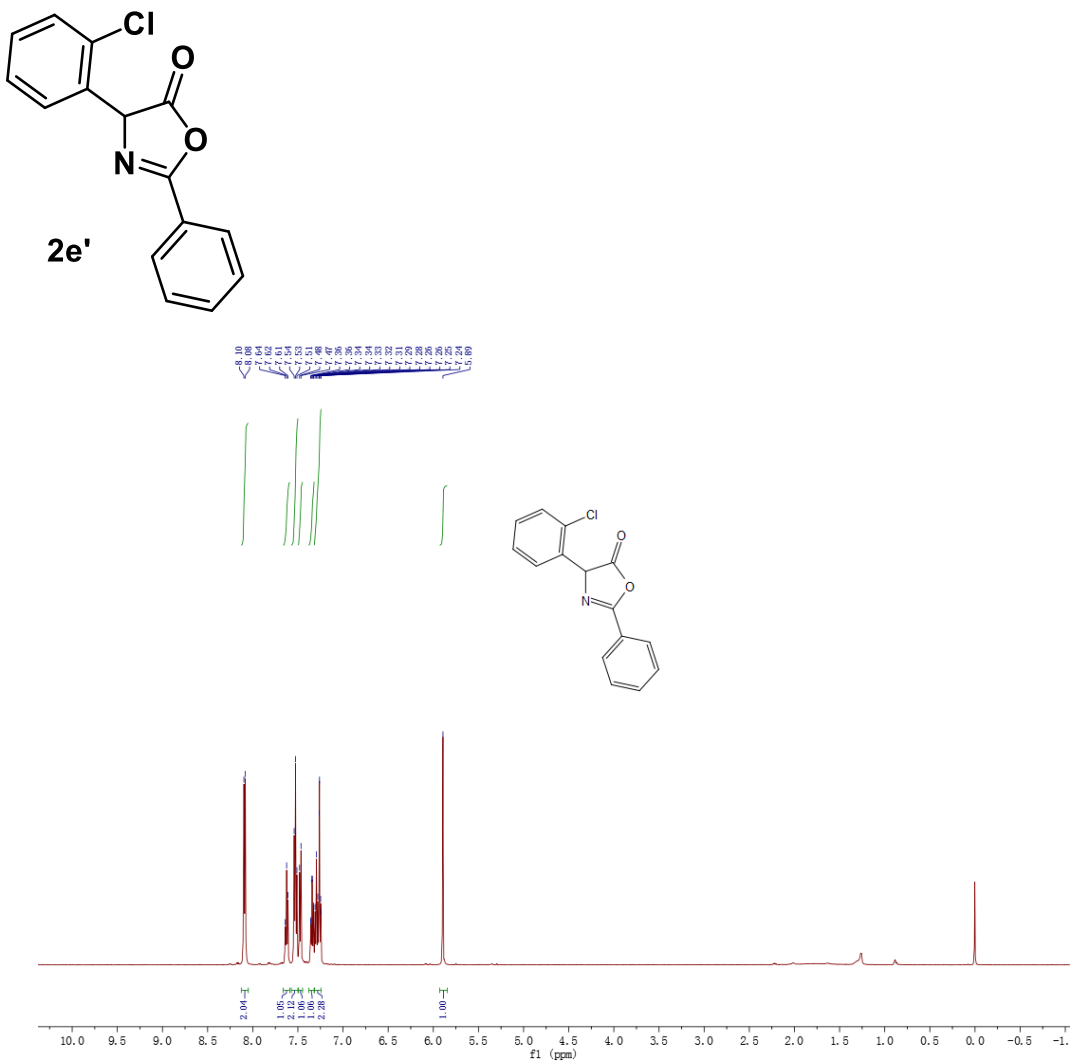

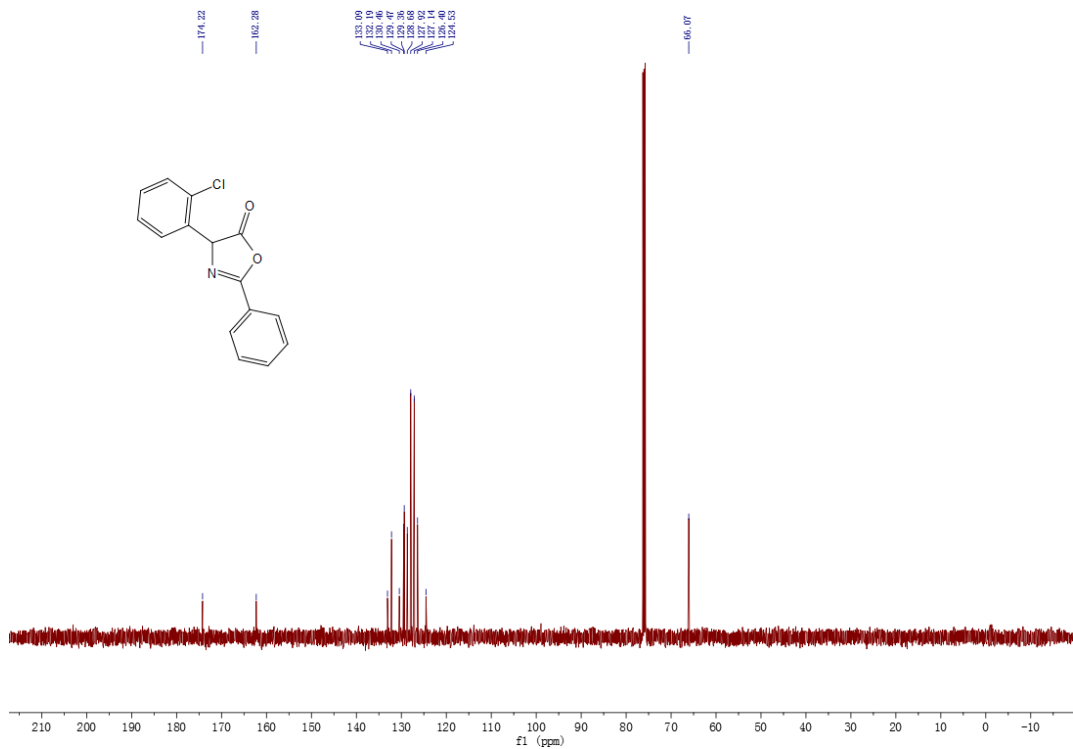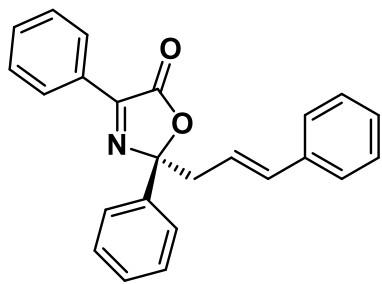

3a

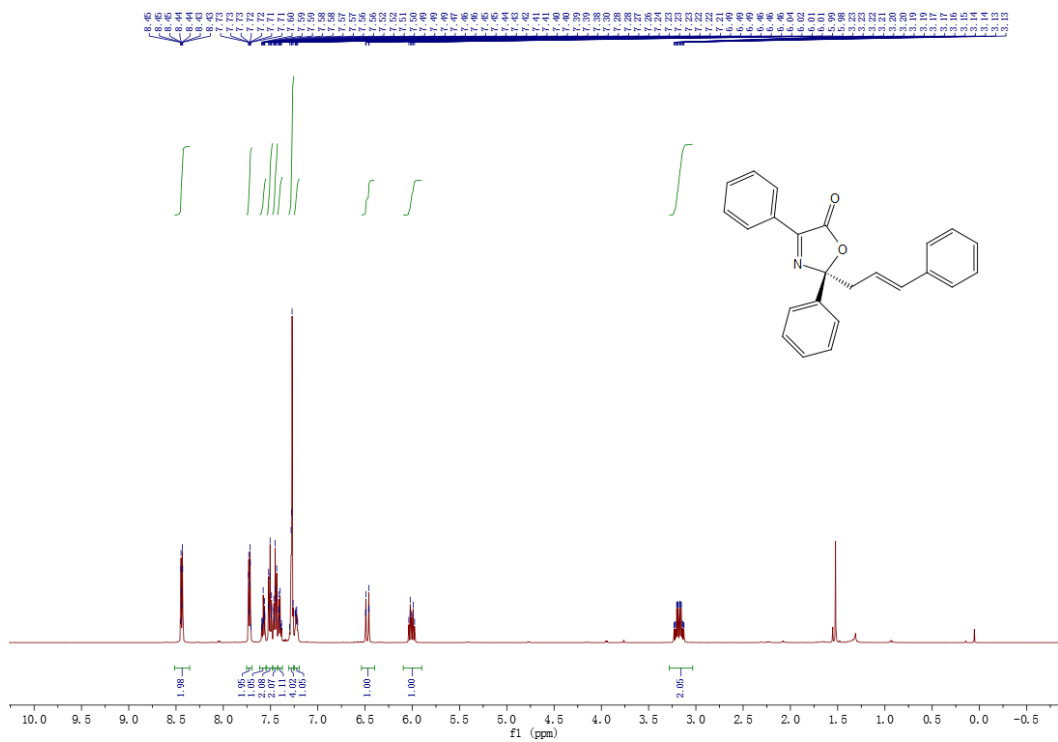



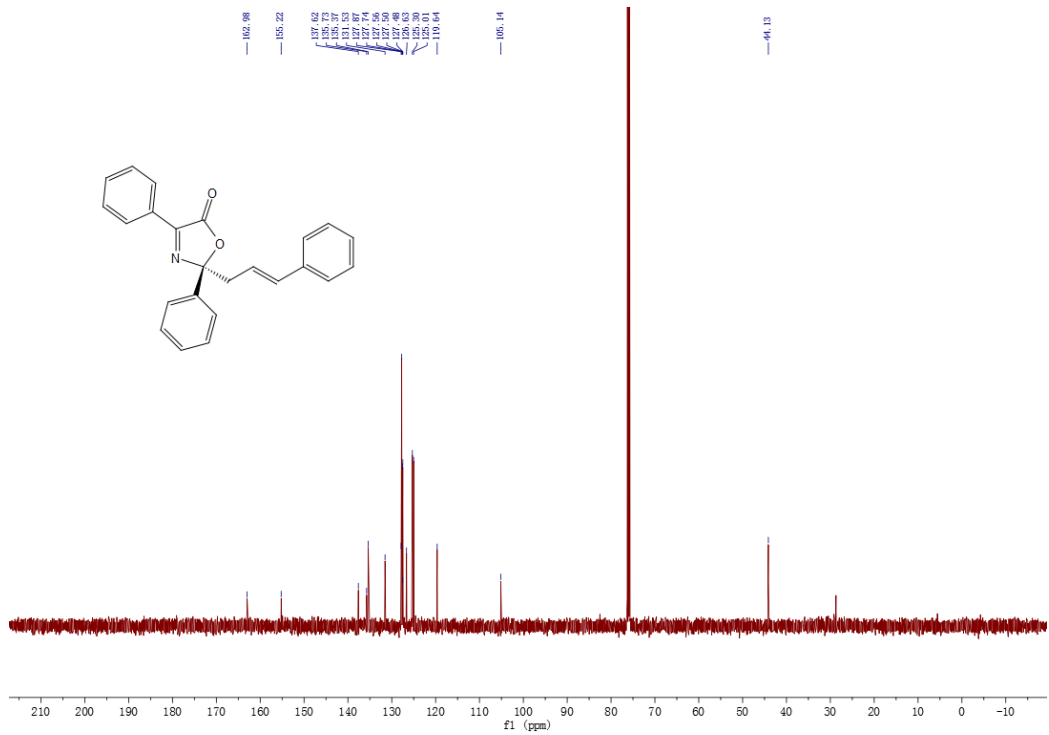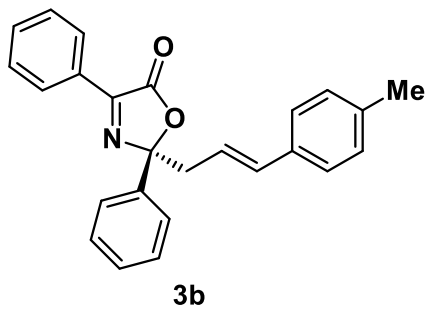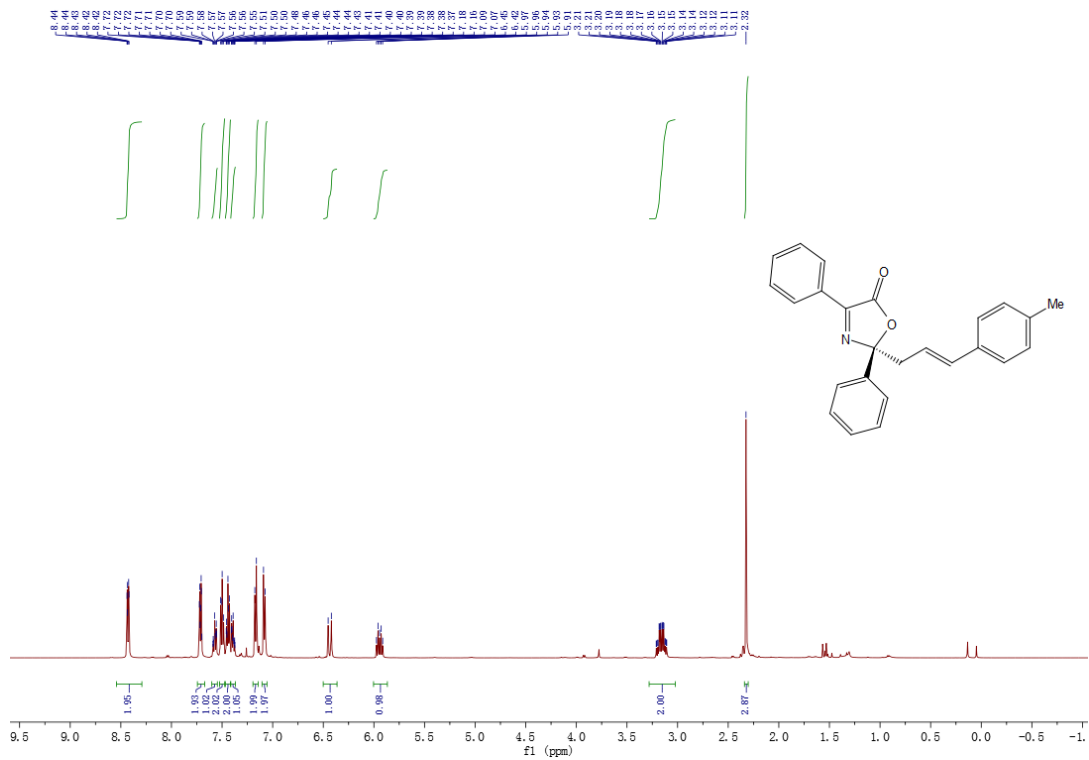

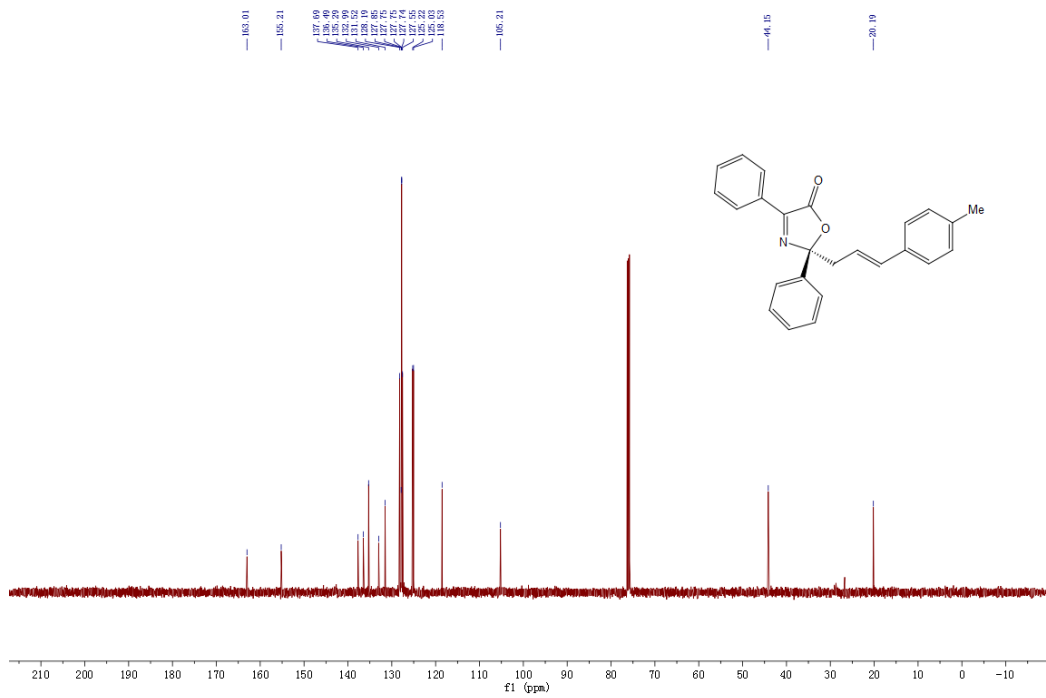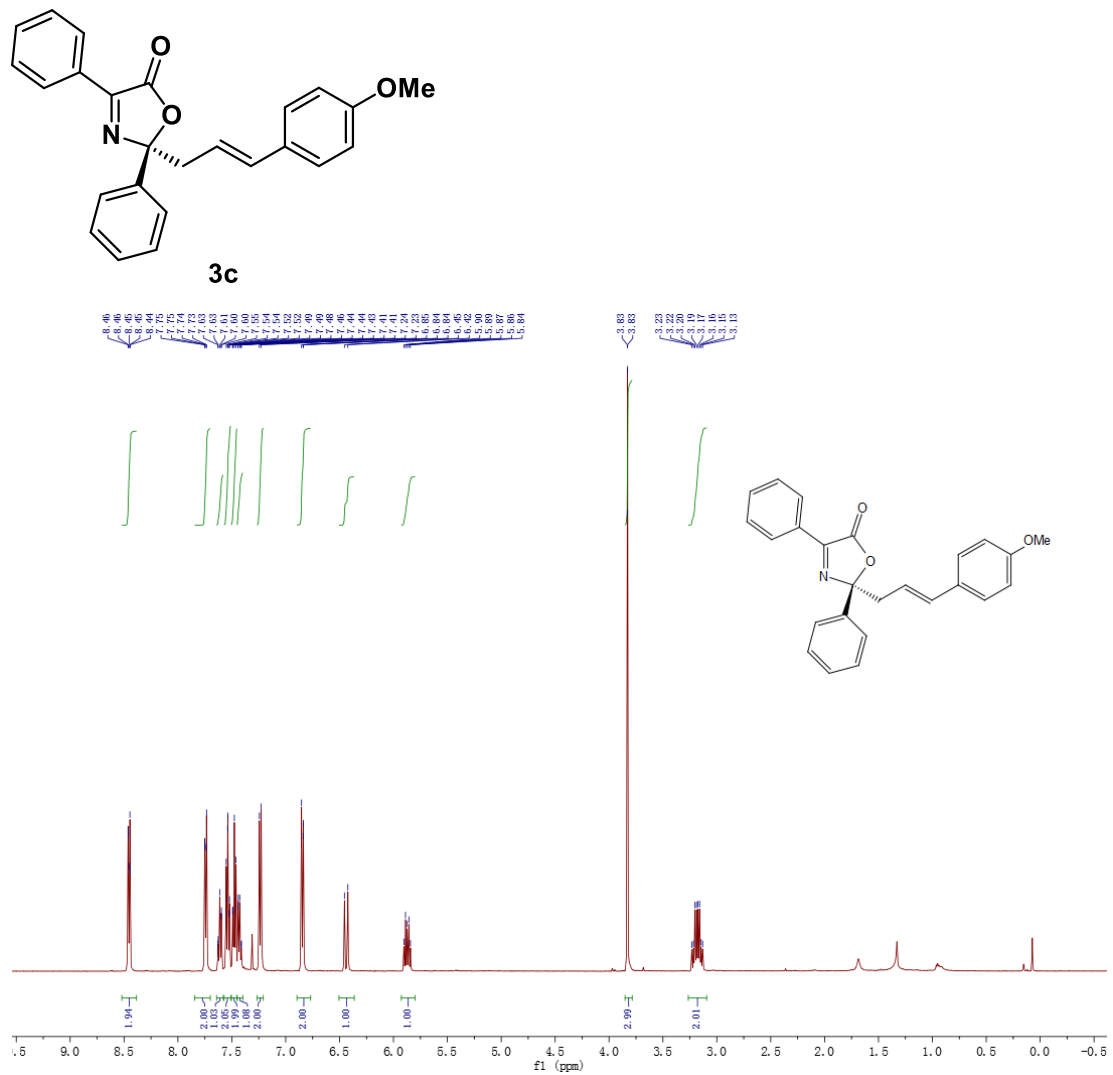

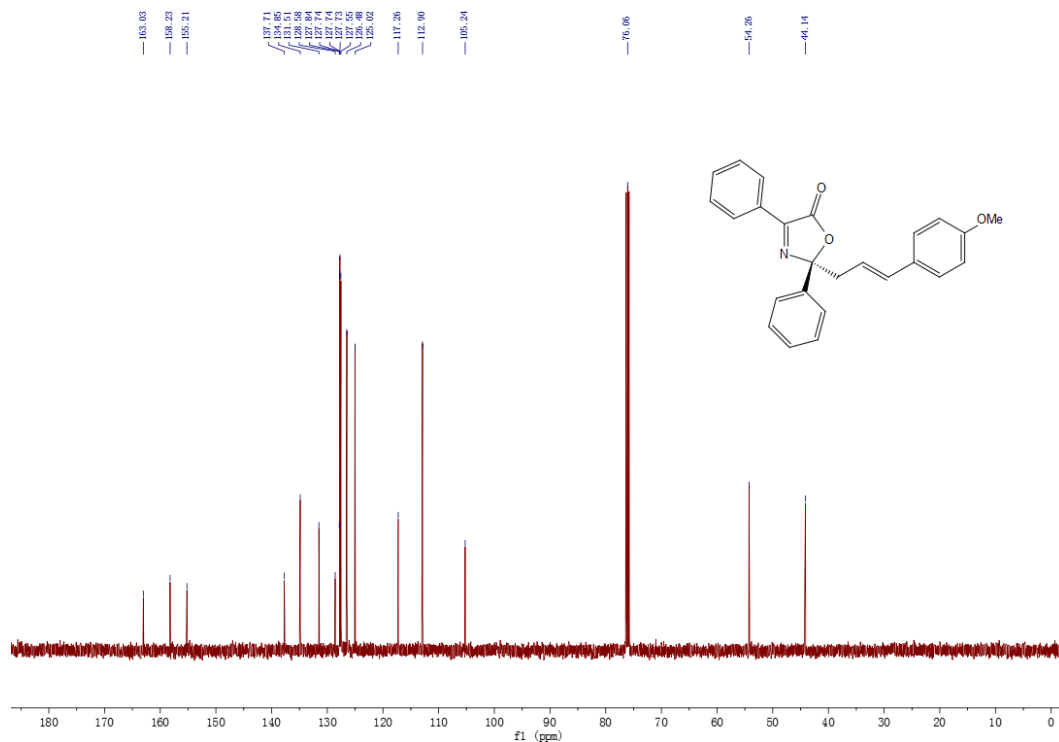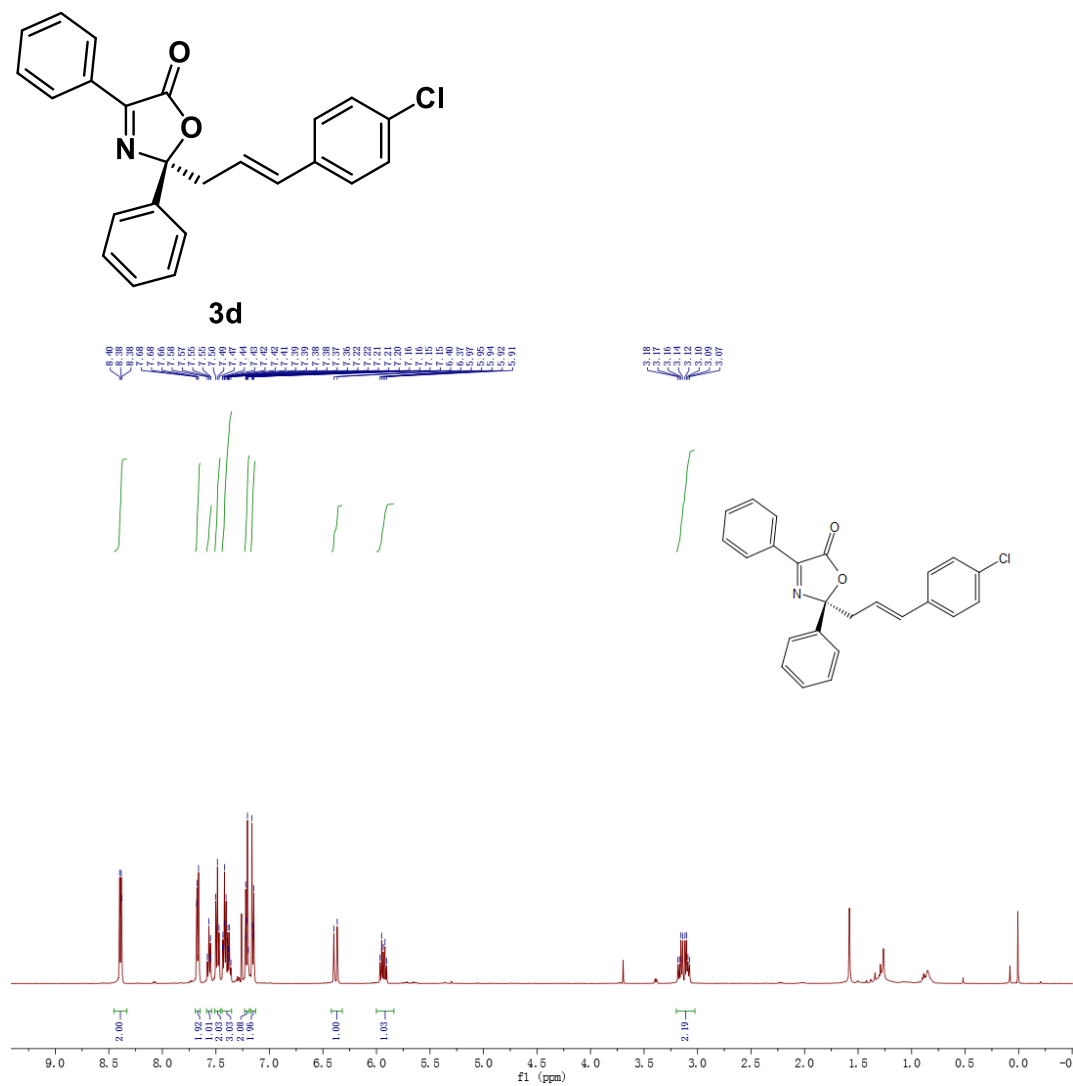

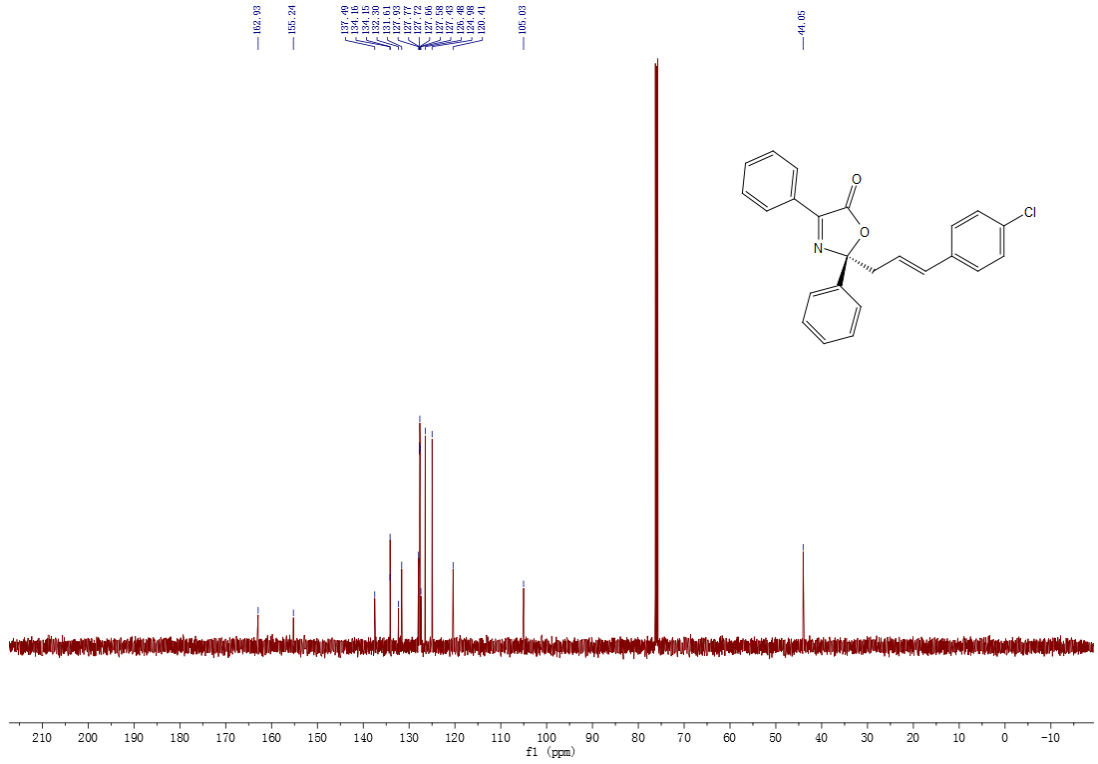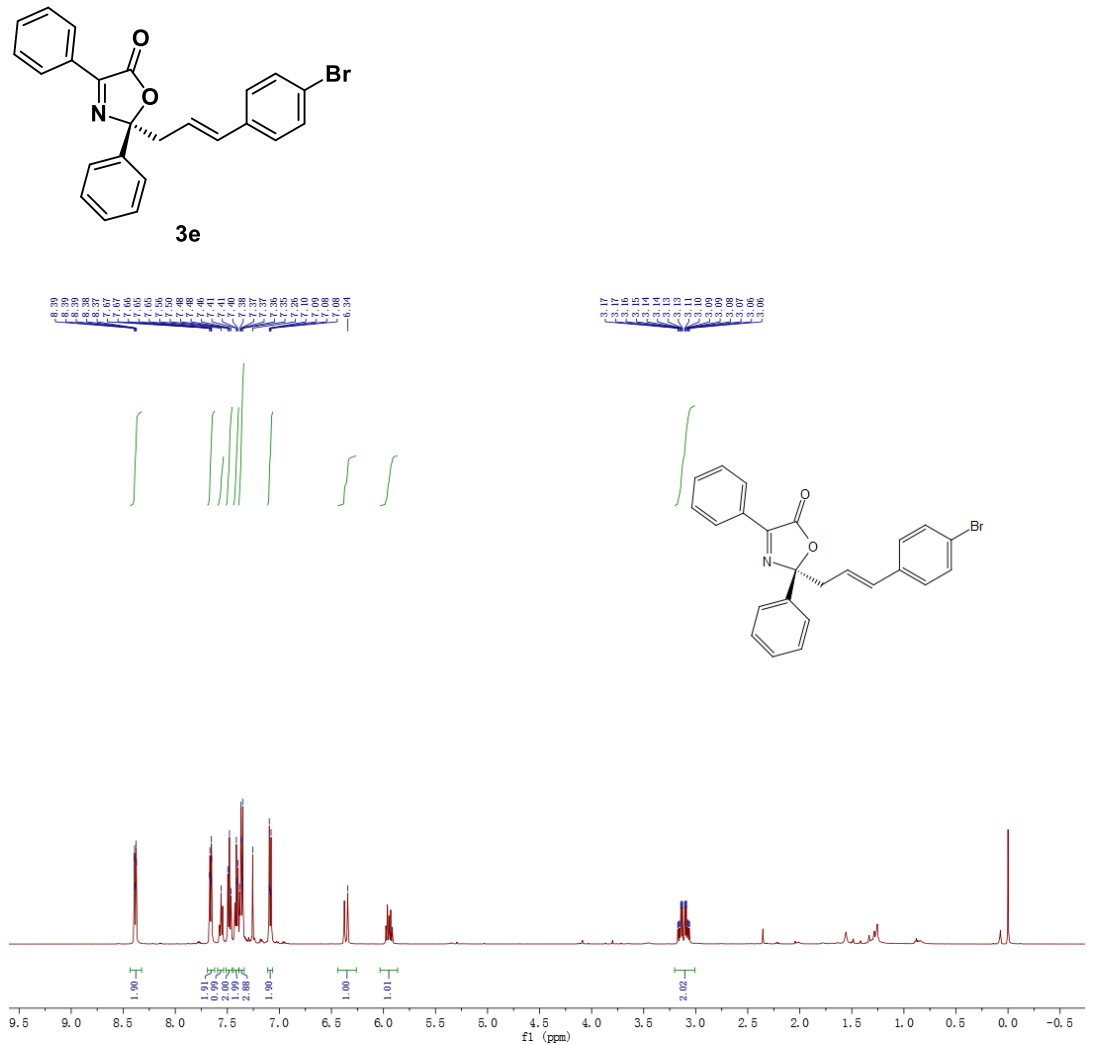

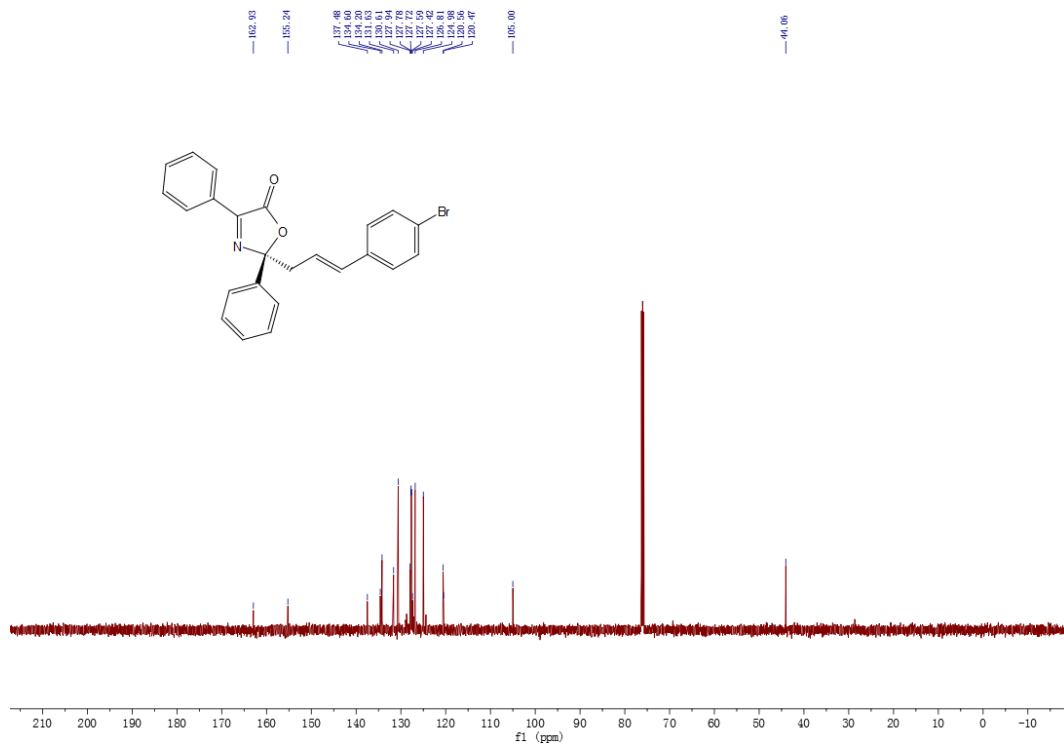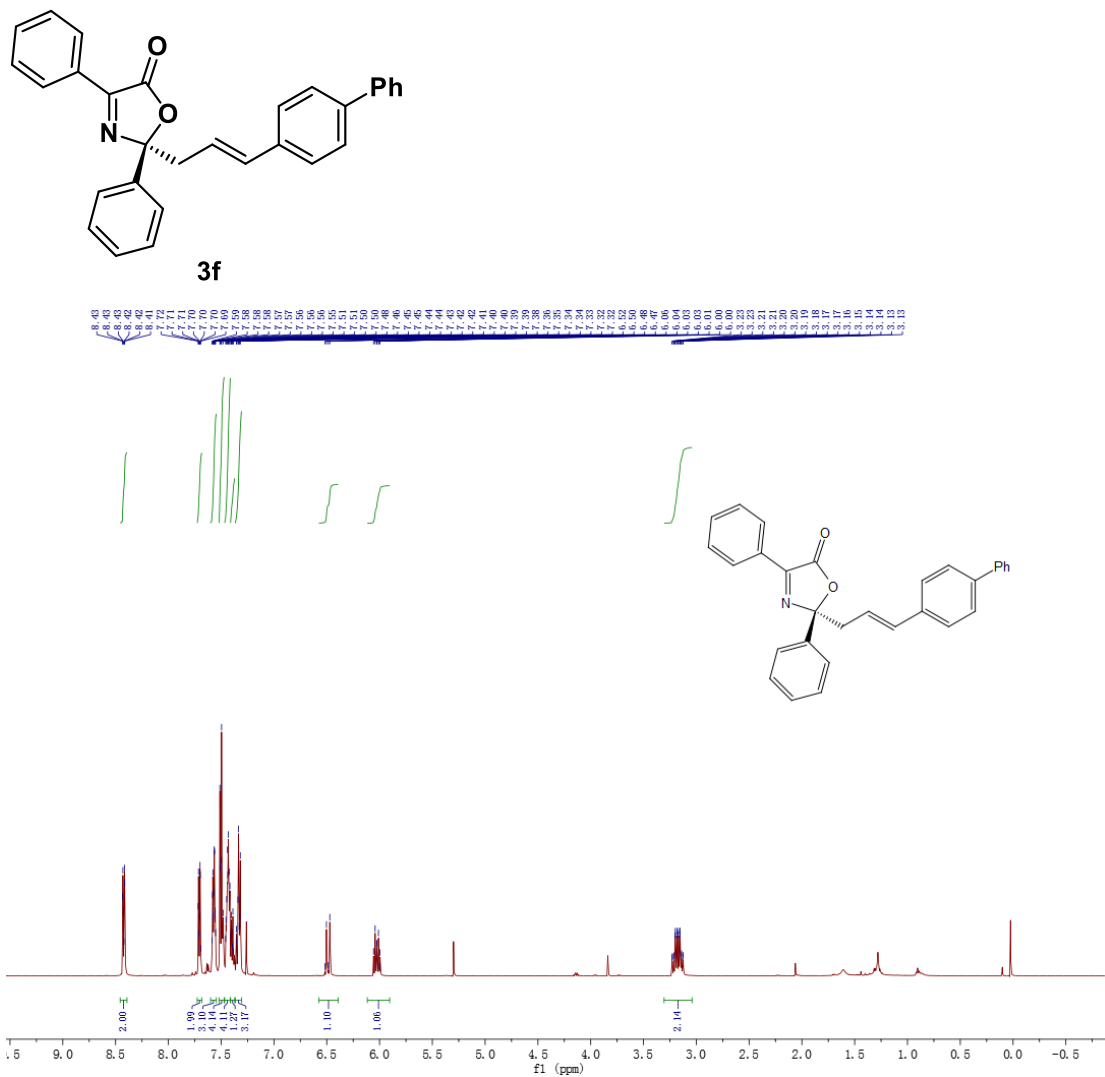

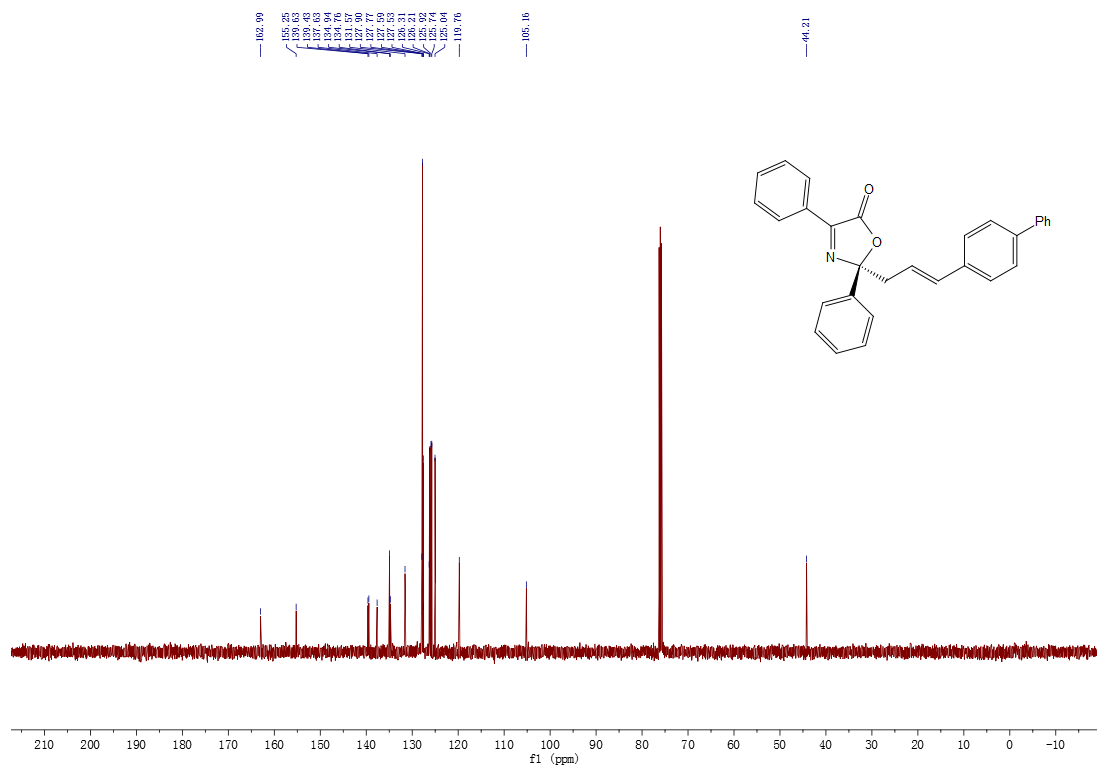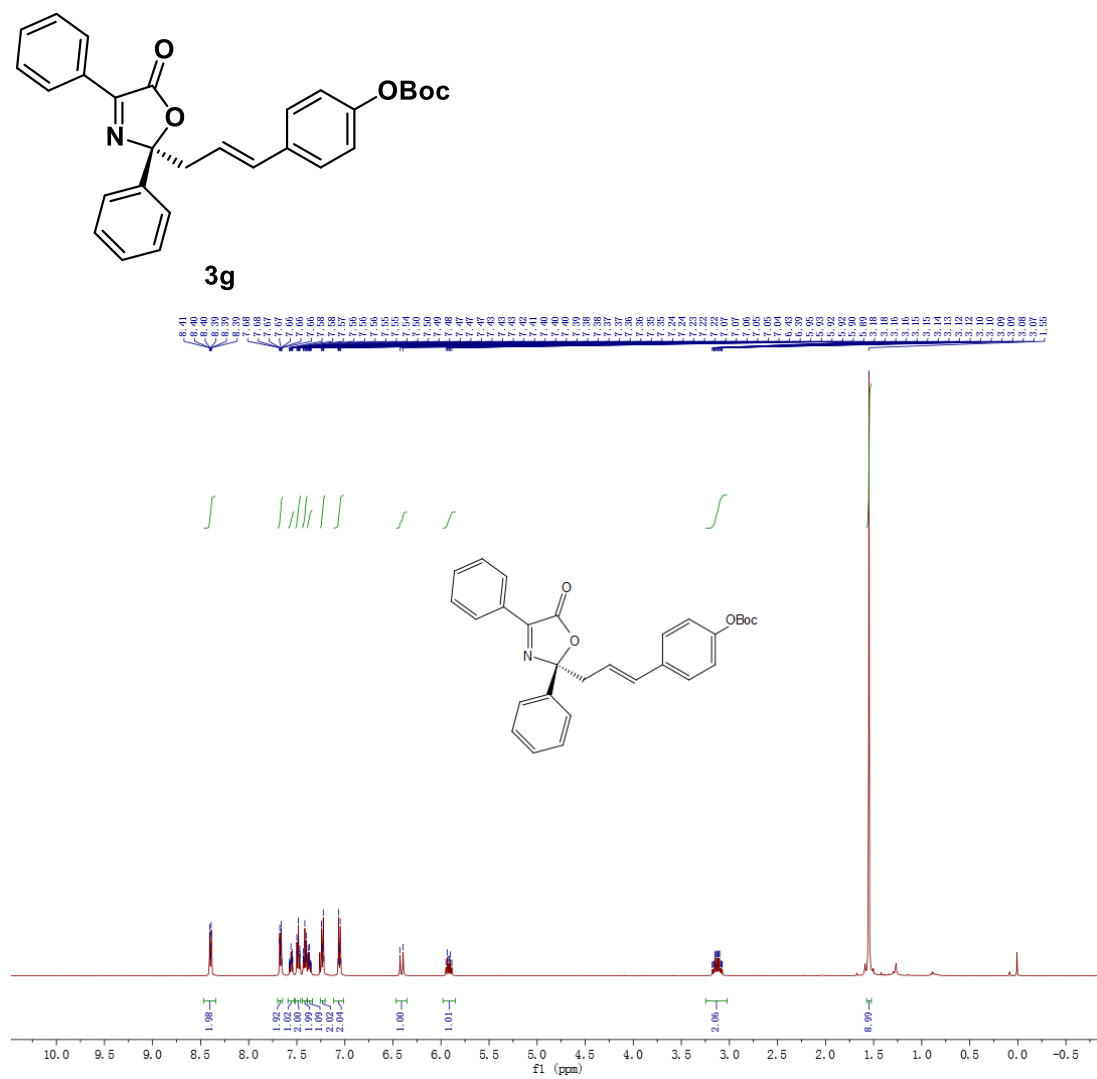

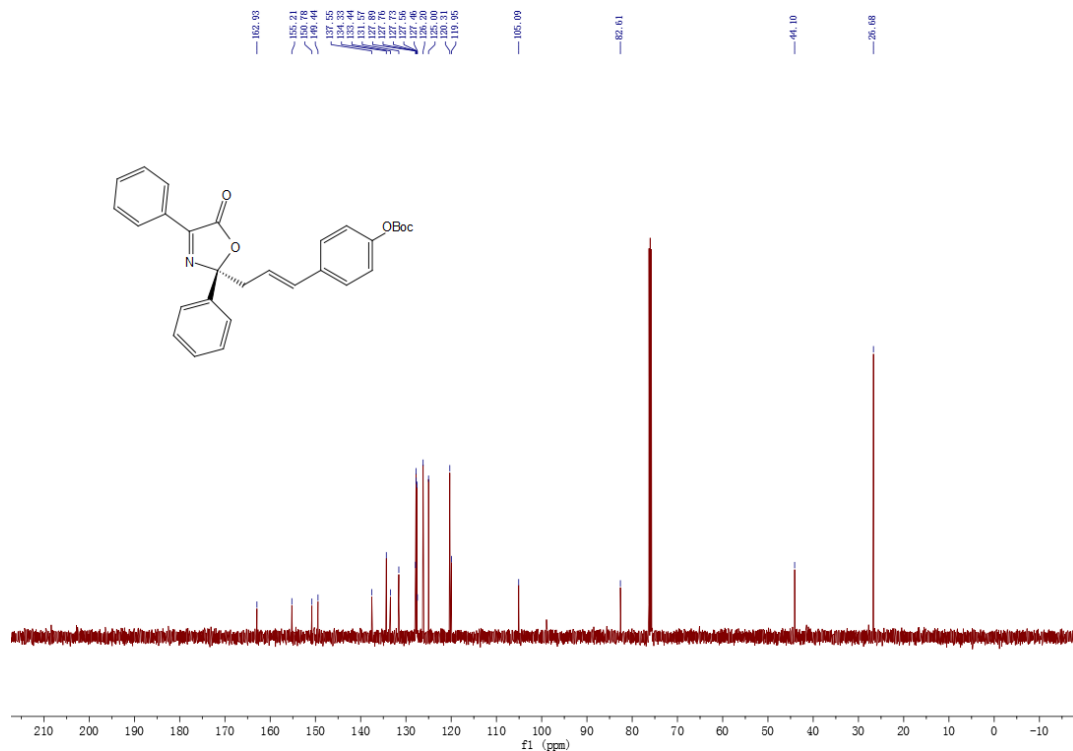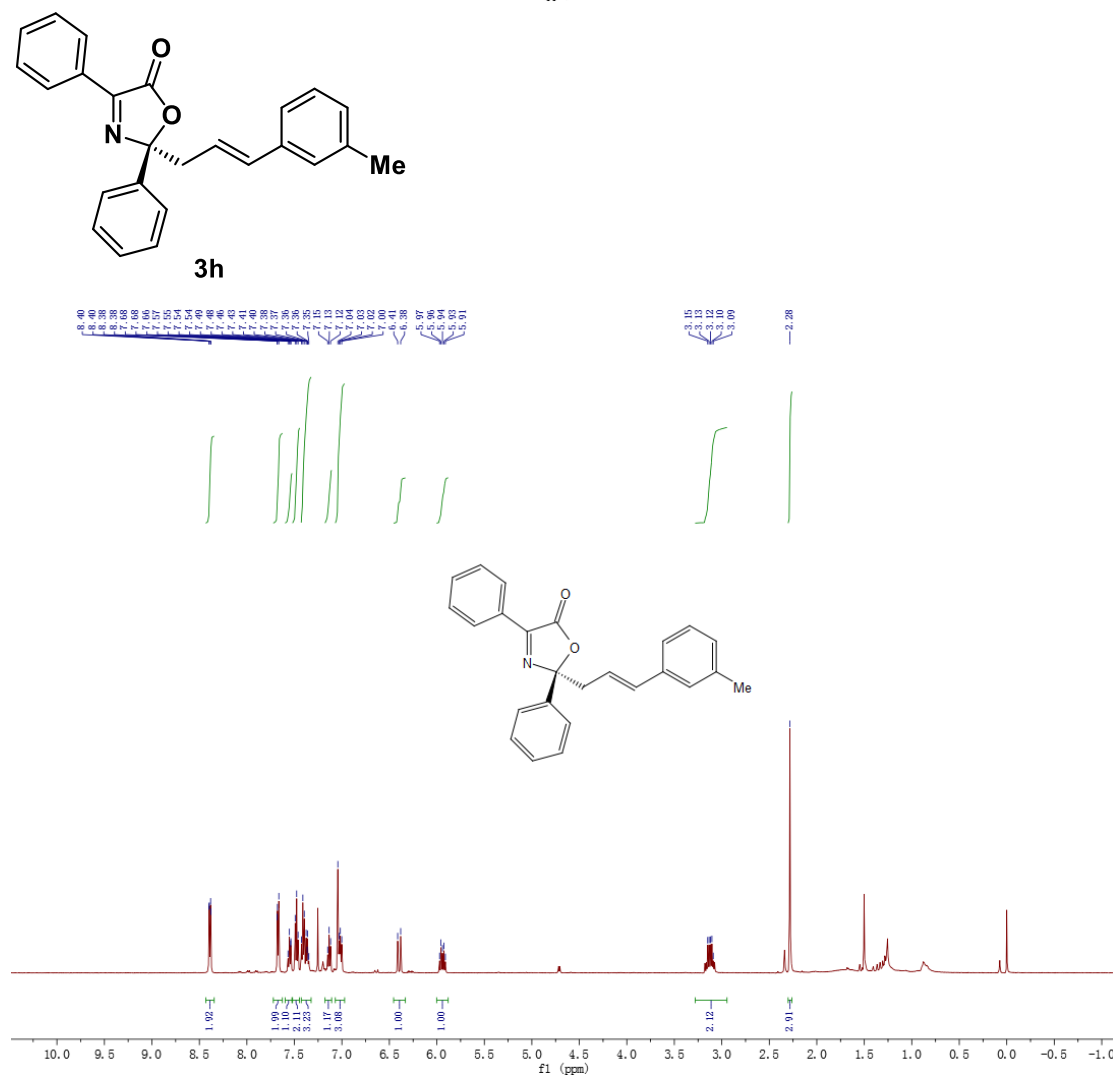

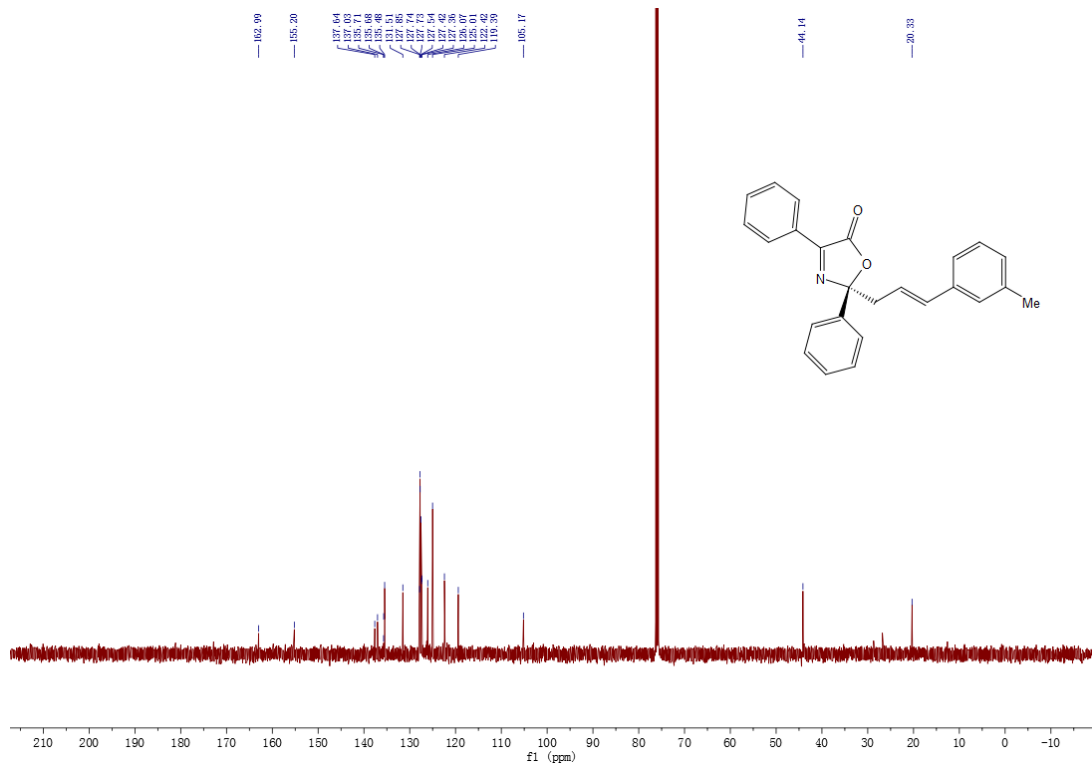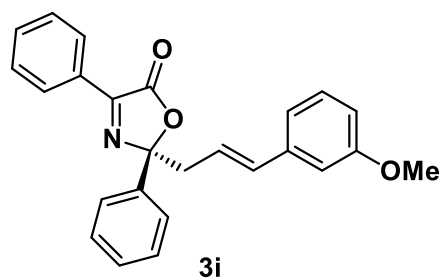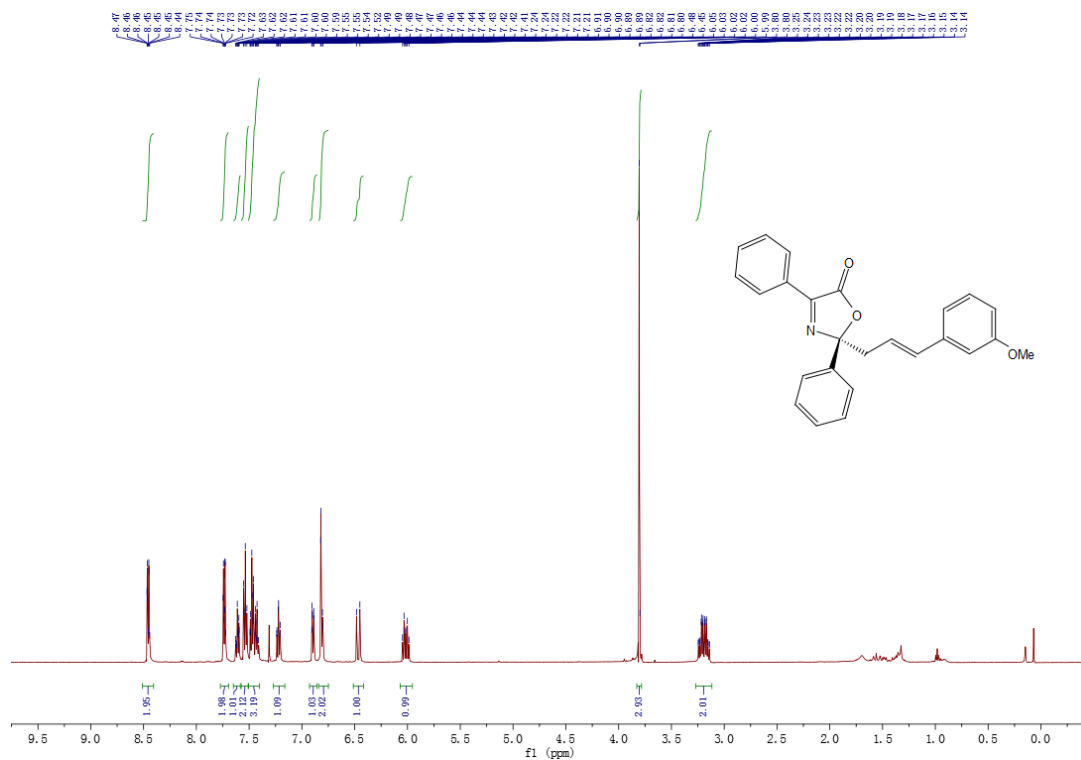



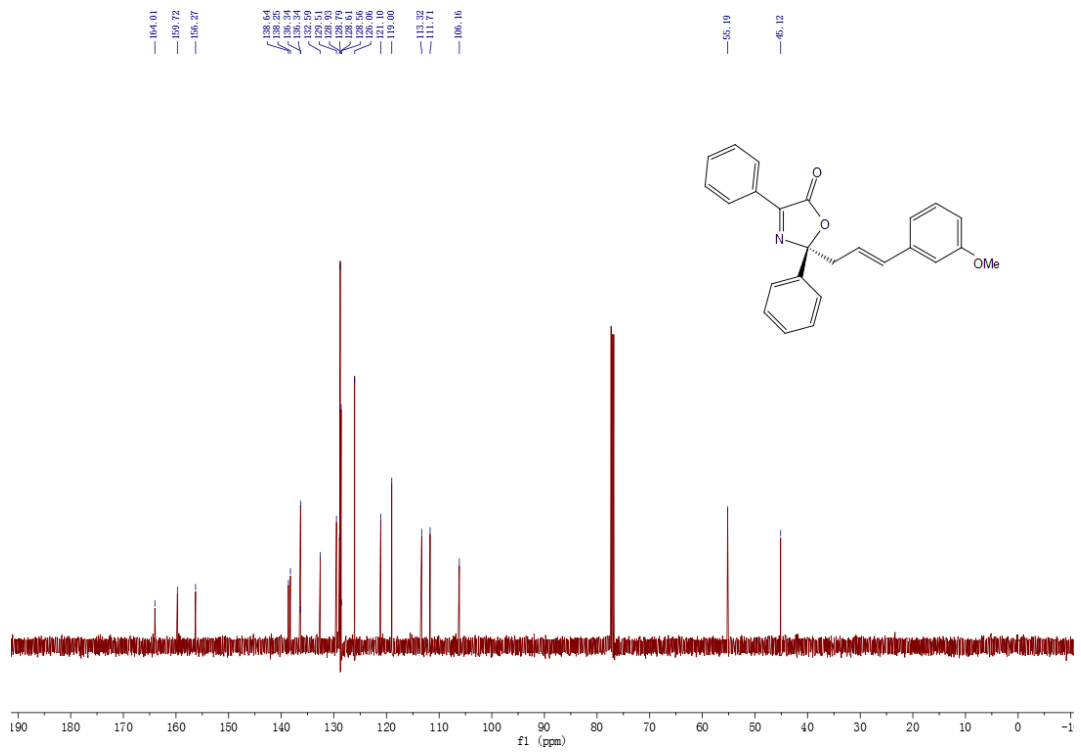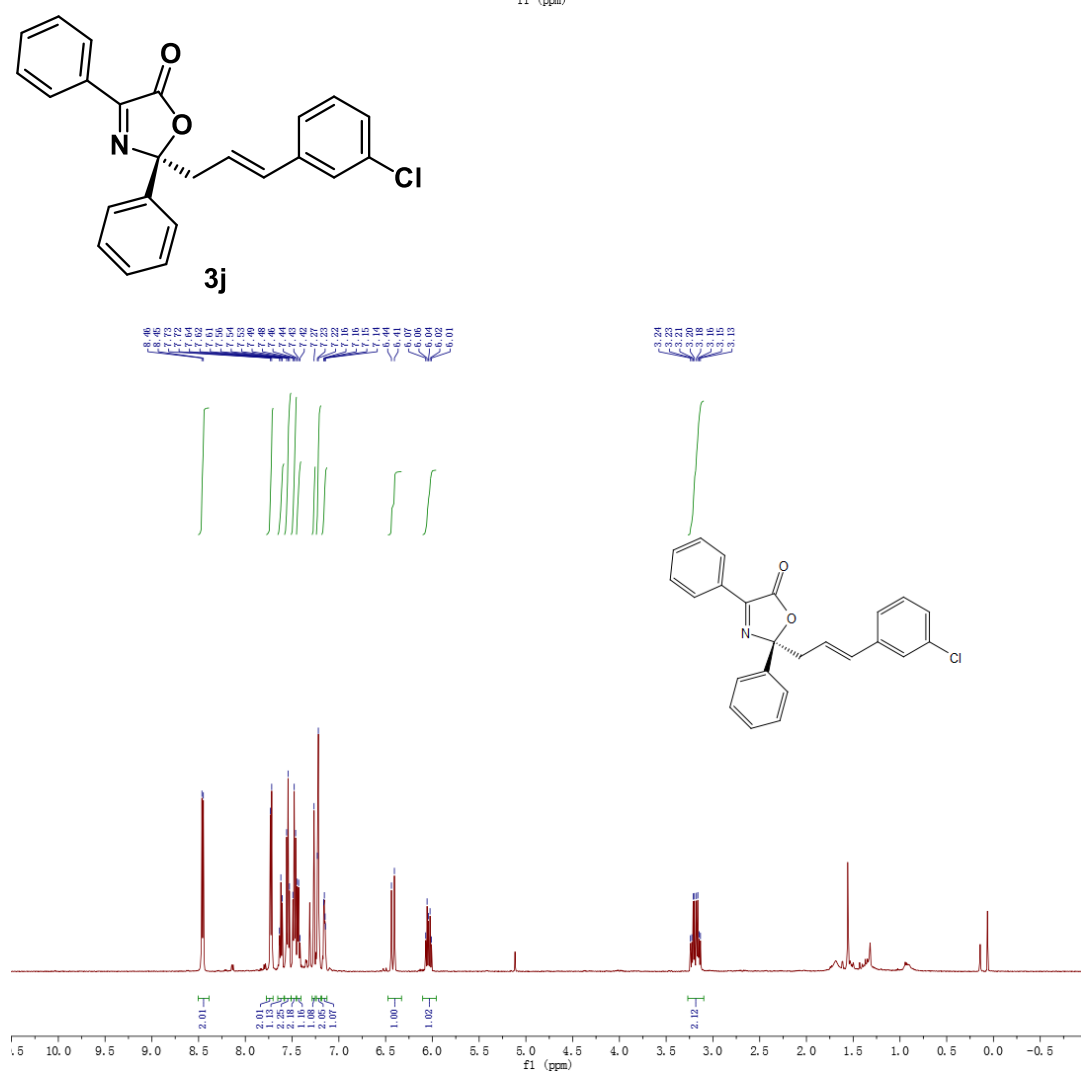

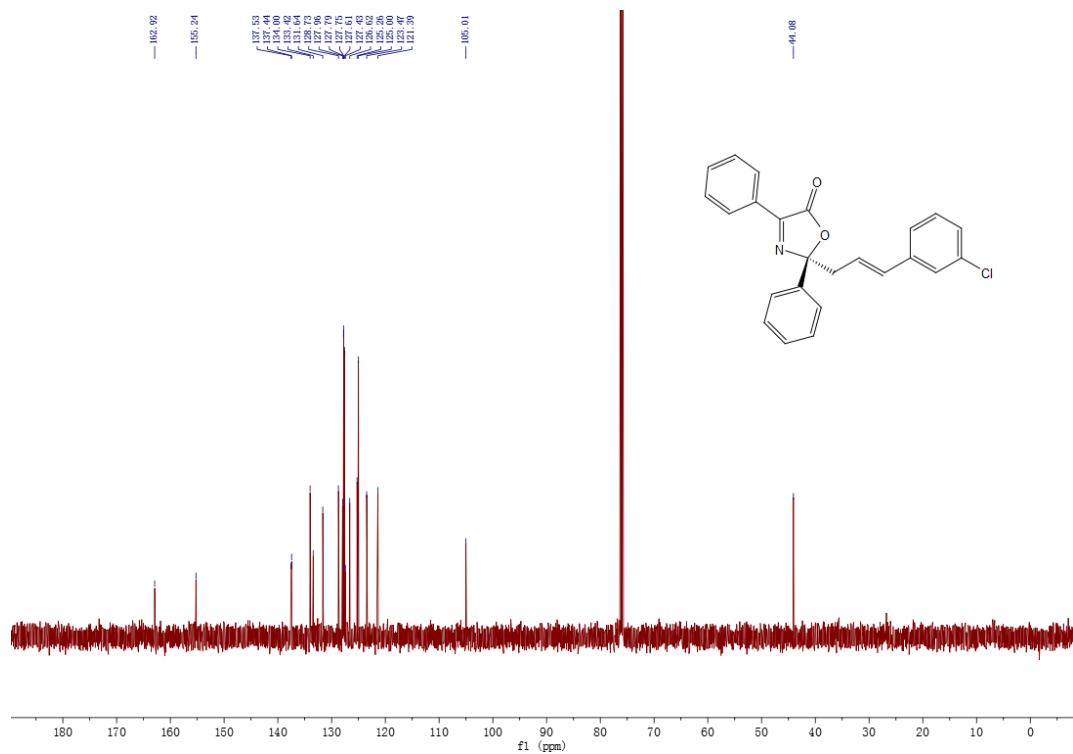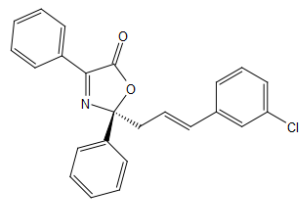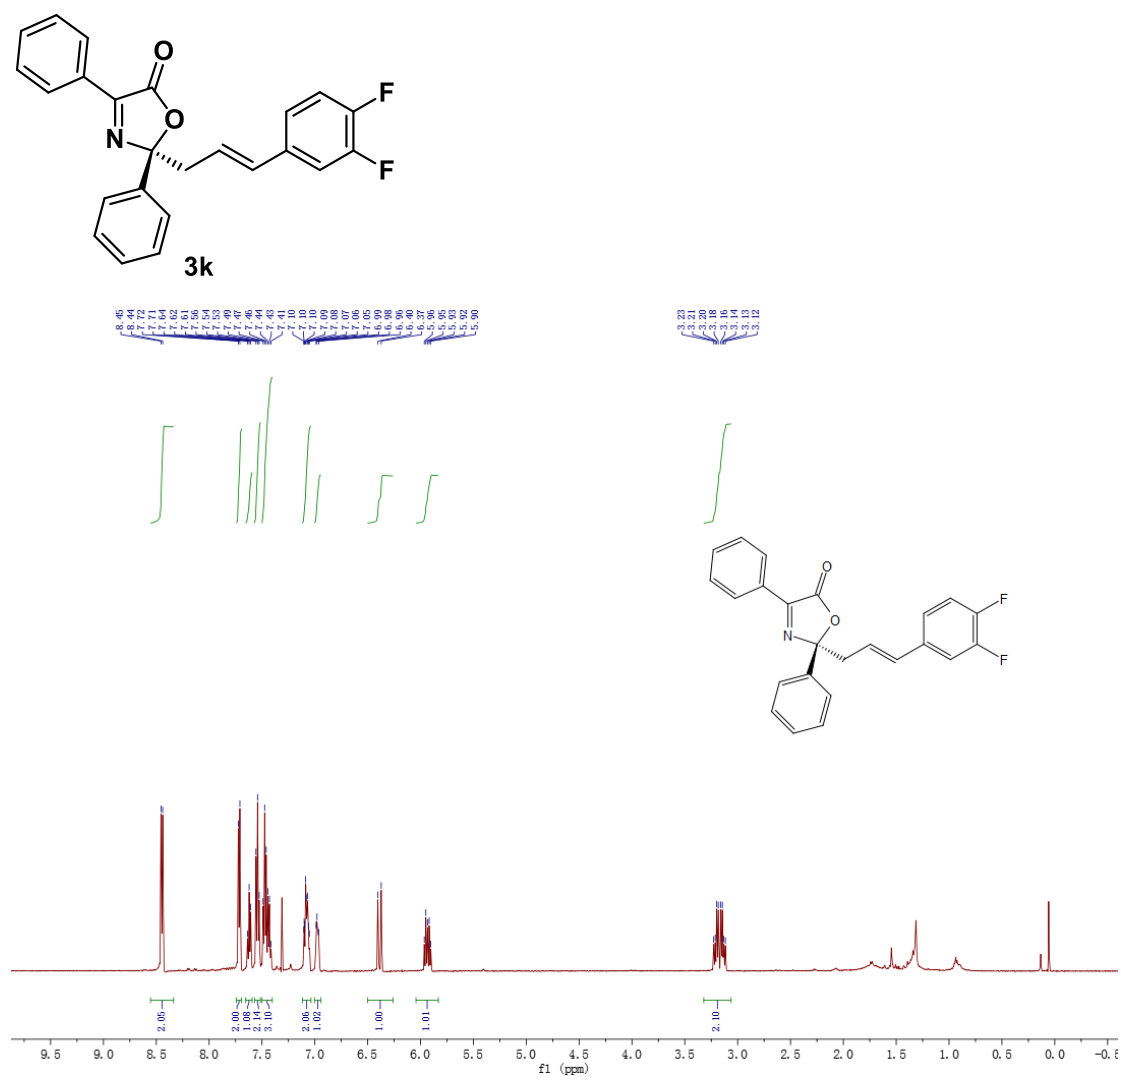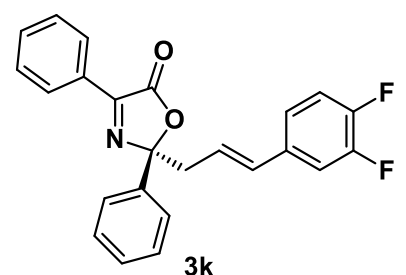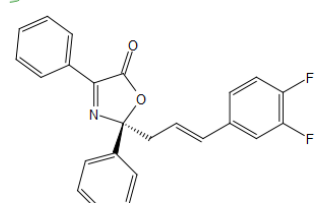



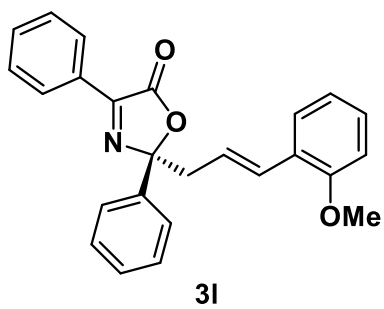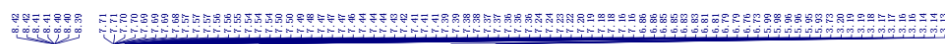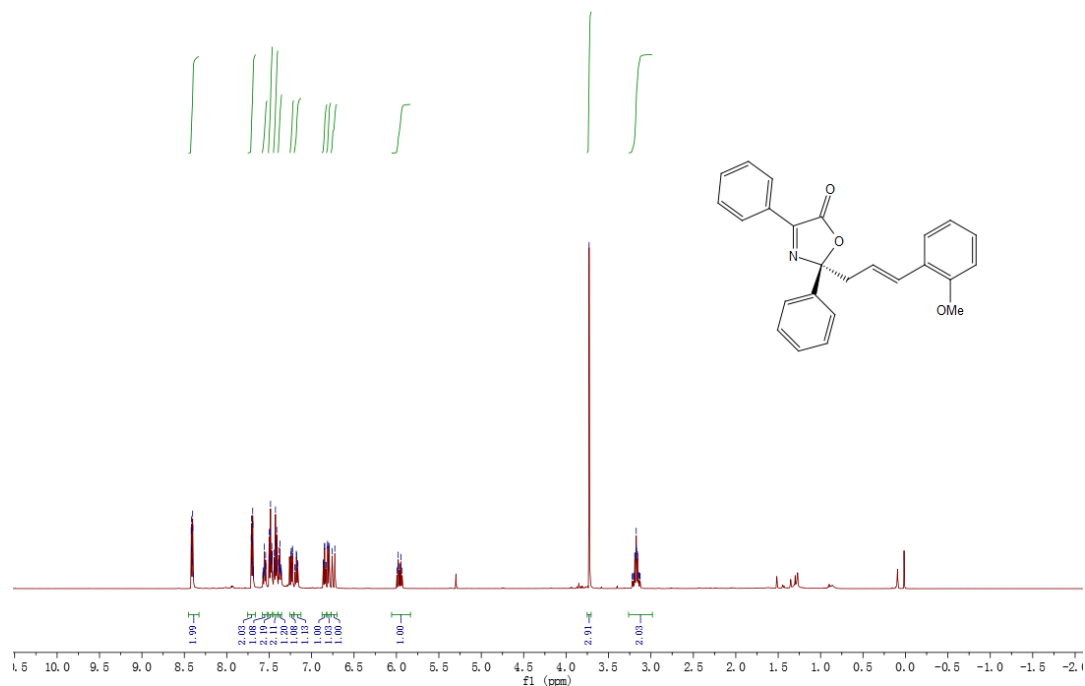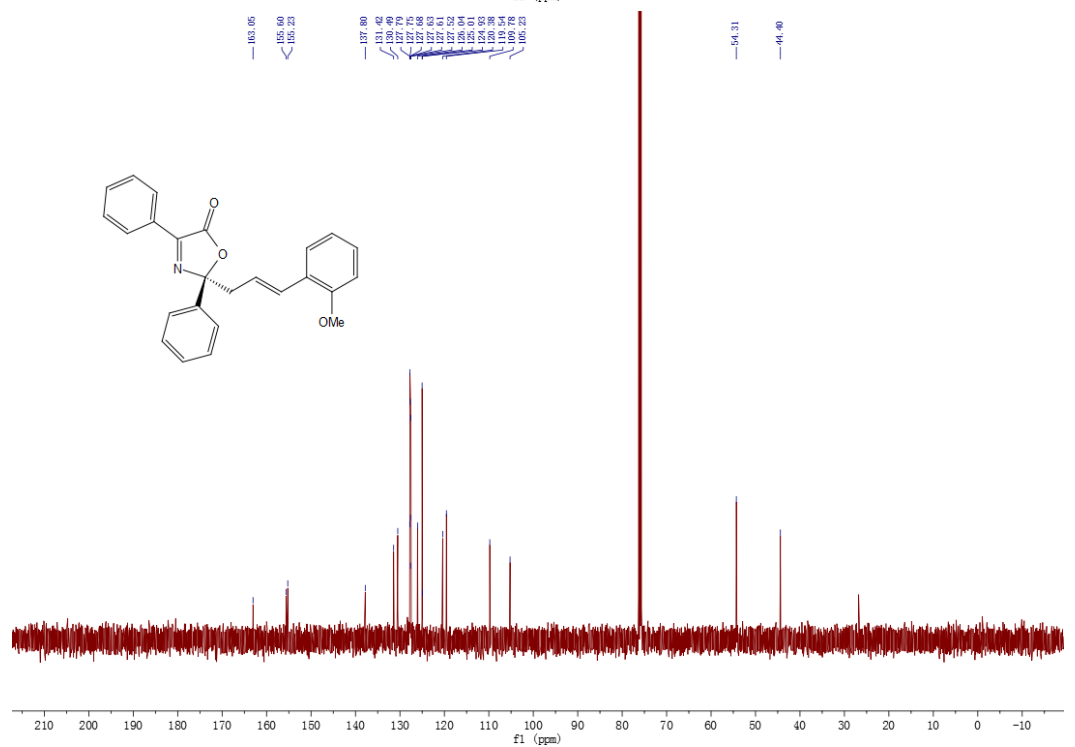

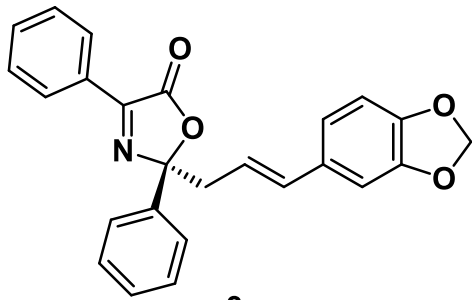

**3m**

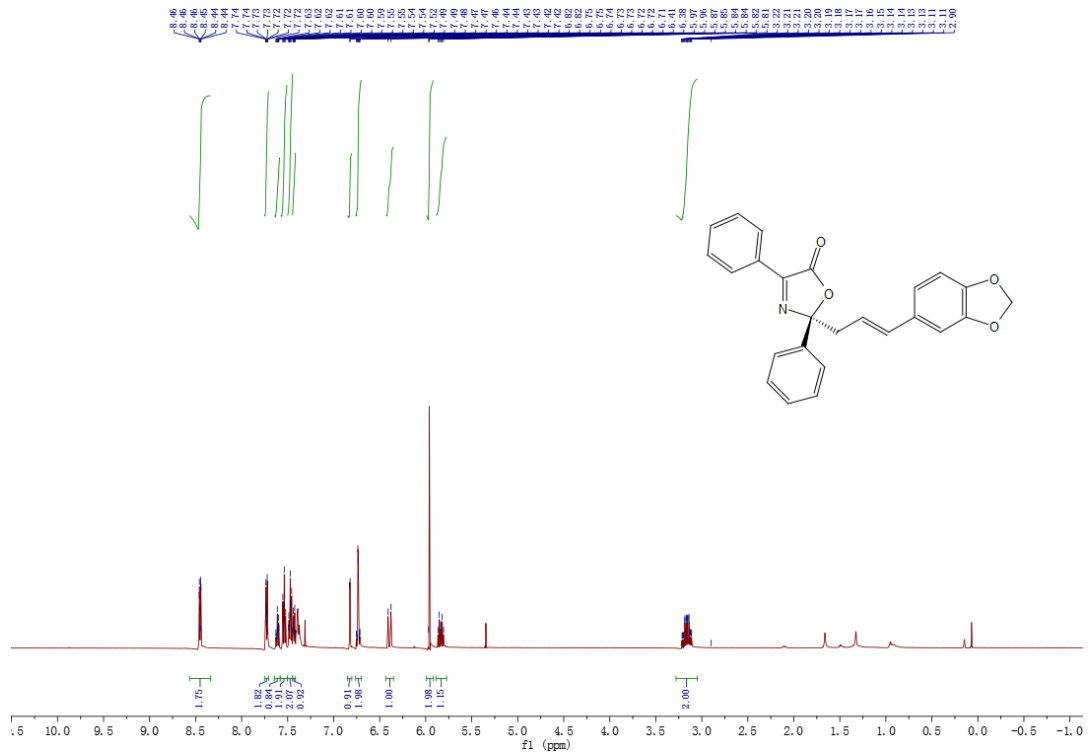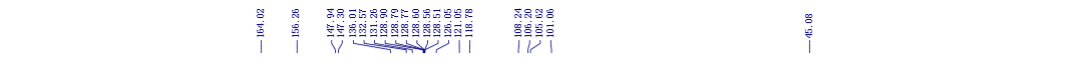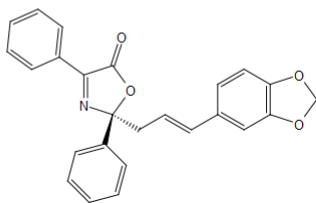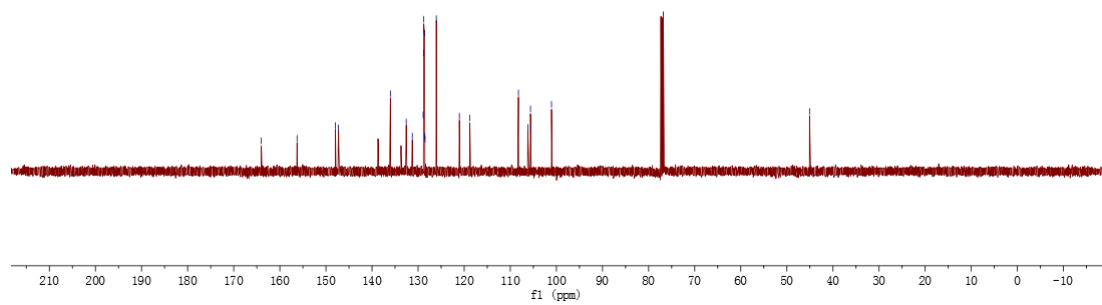

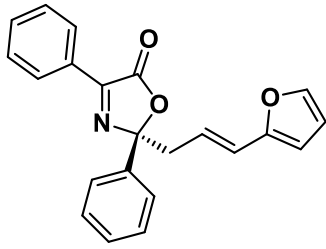

3n

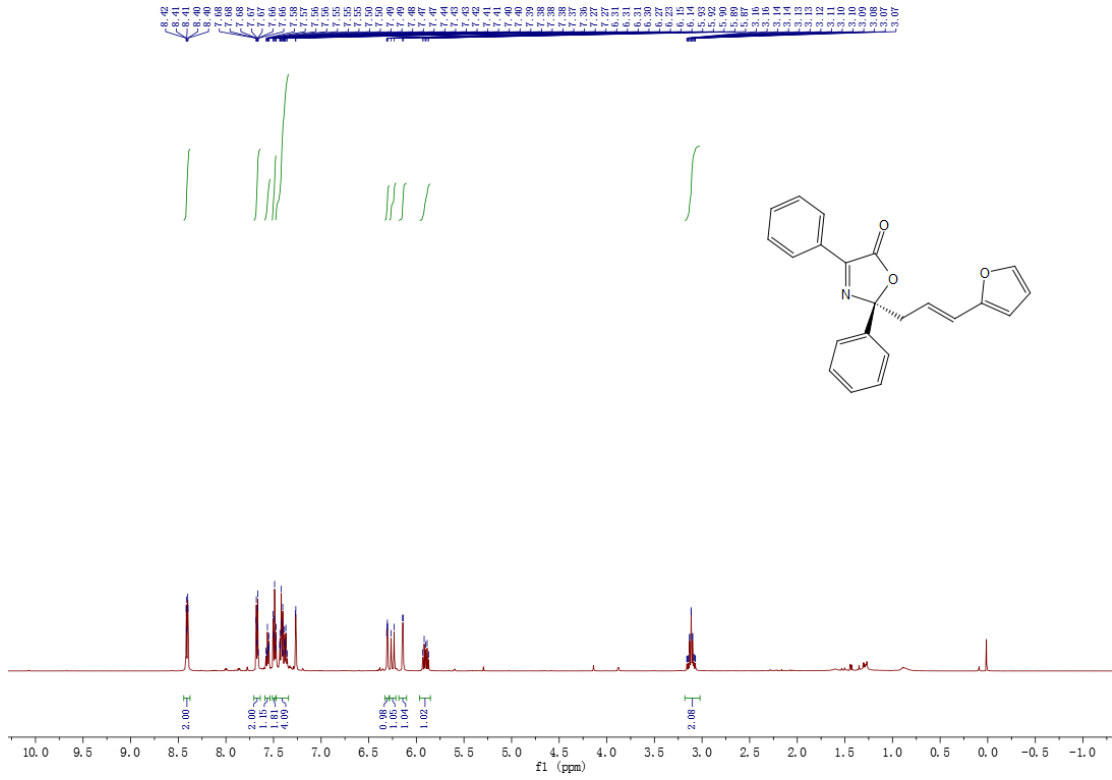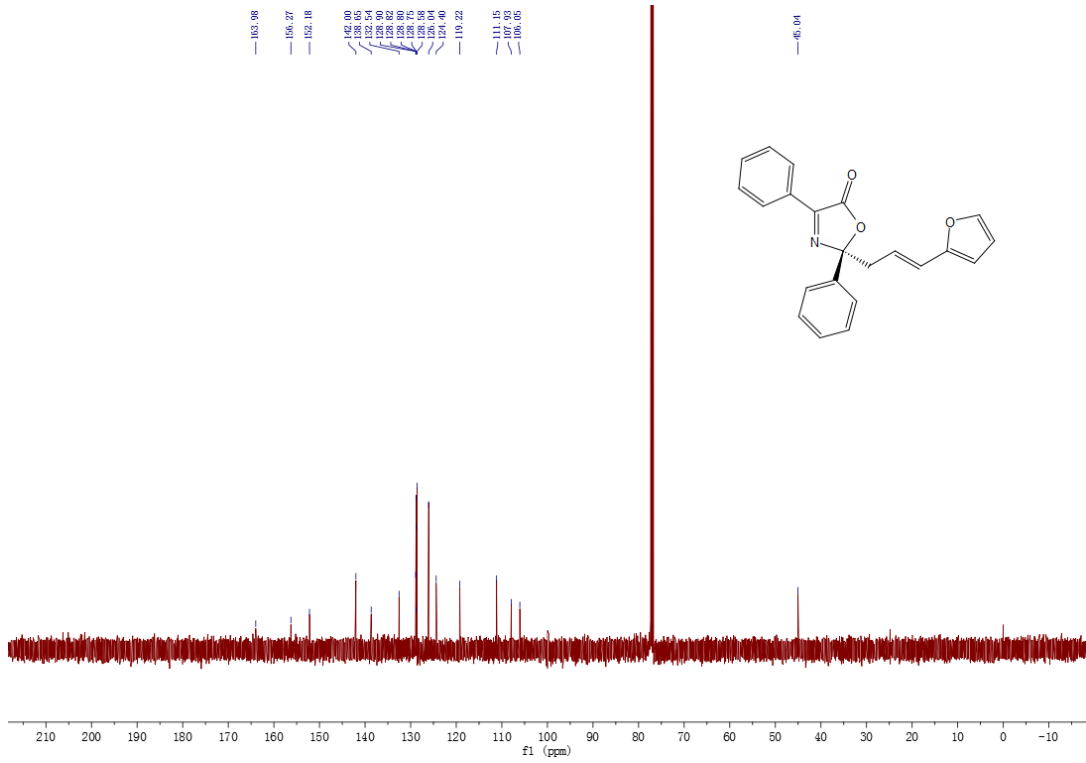

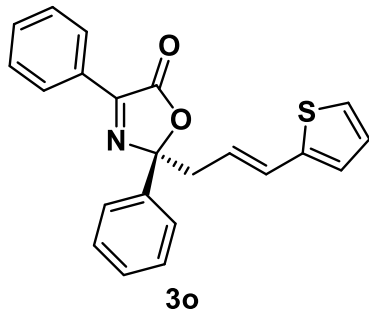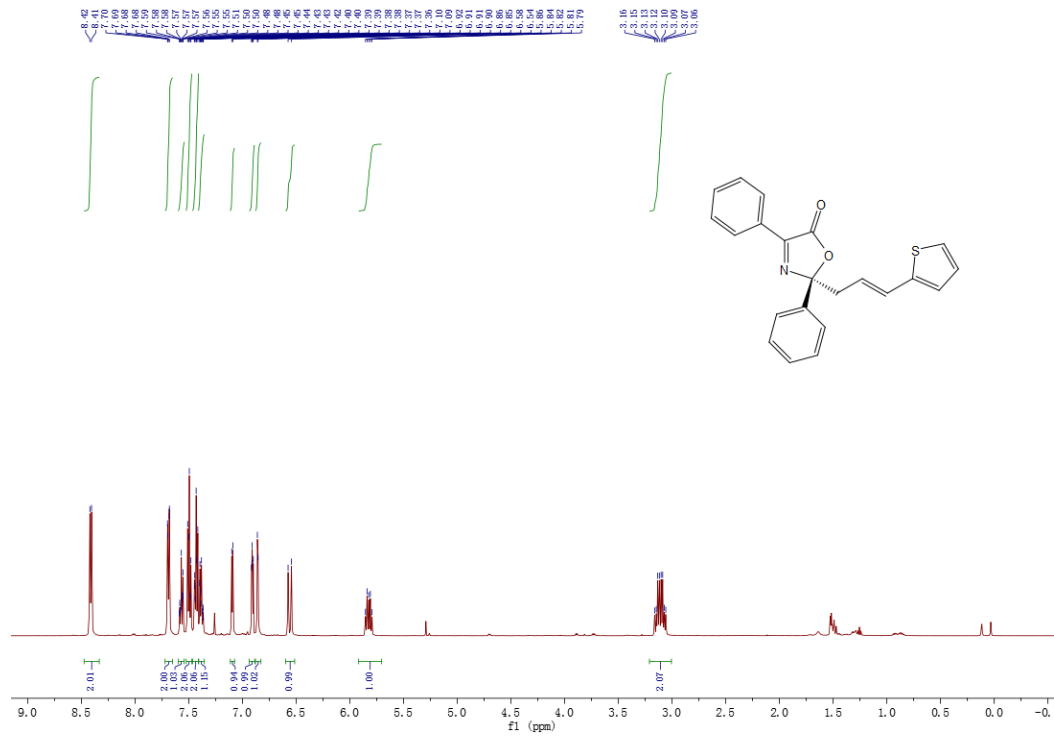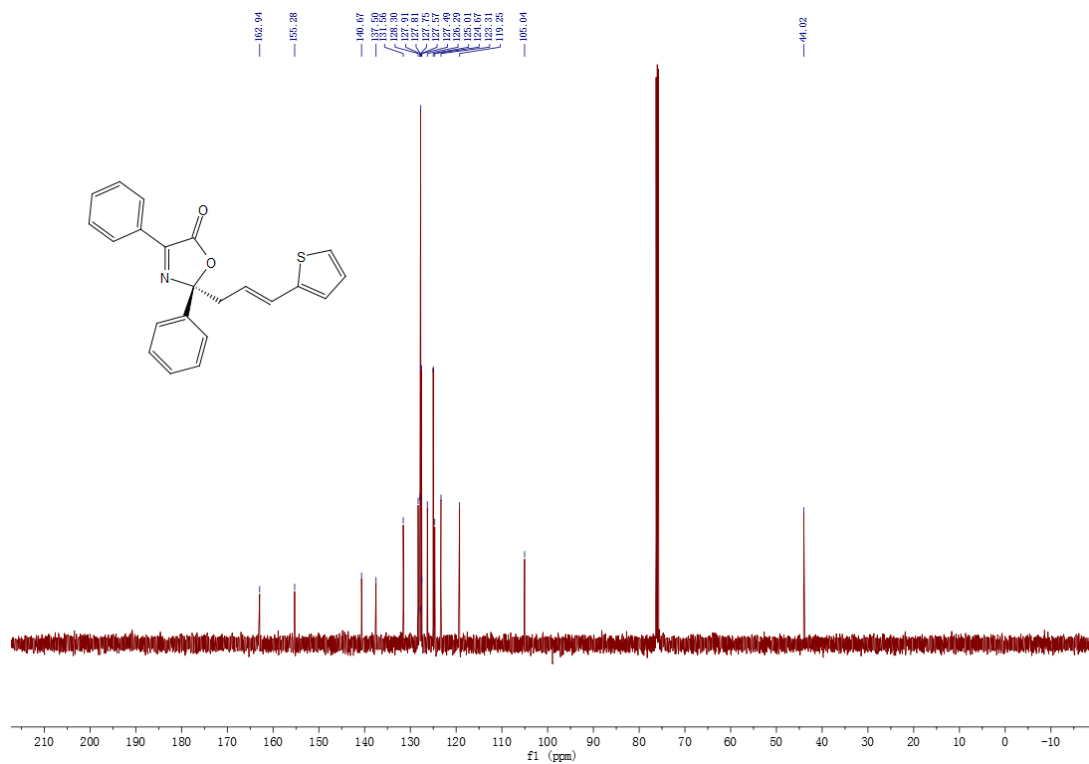

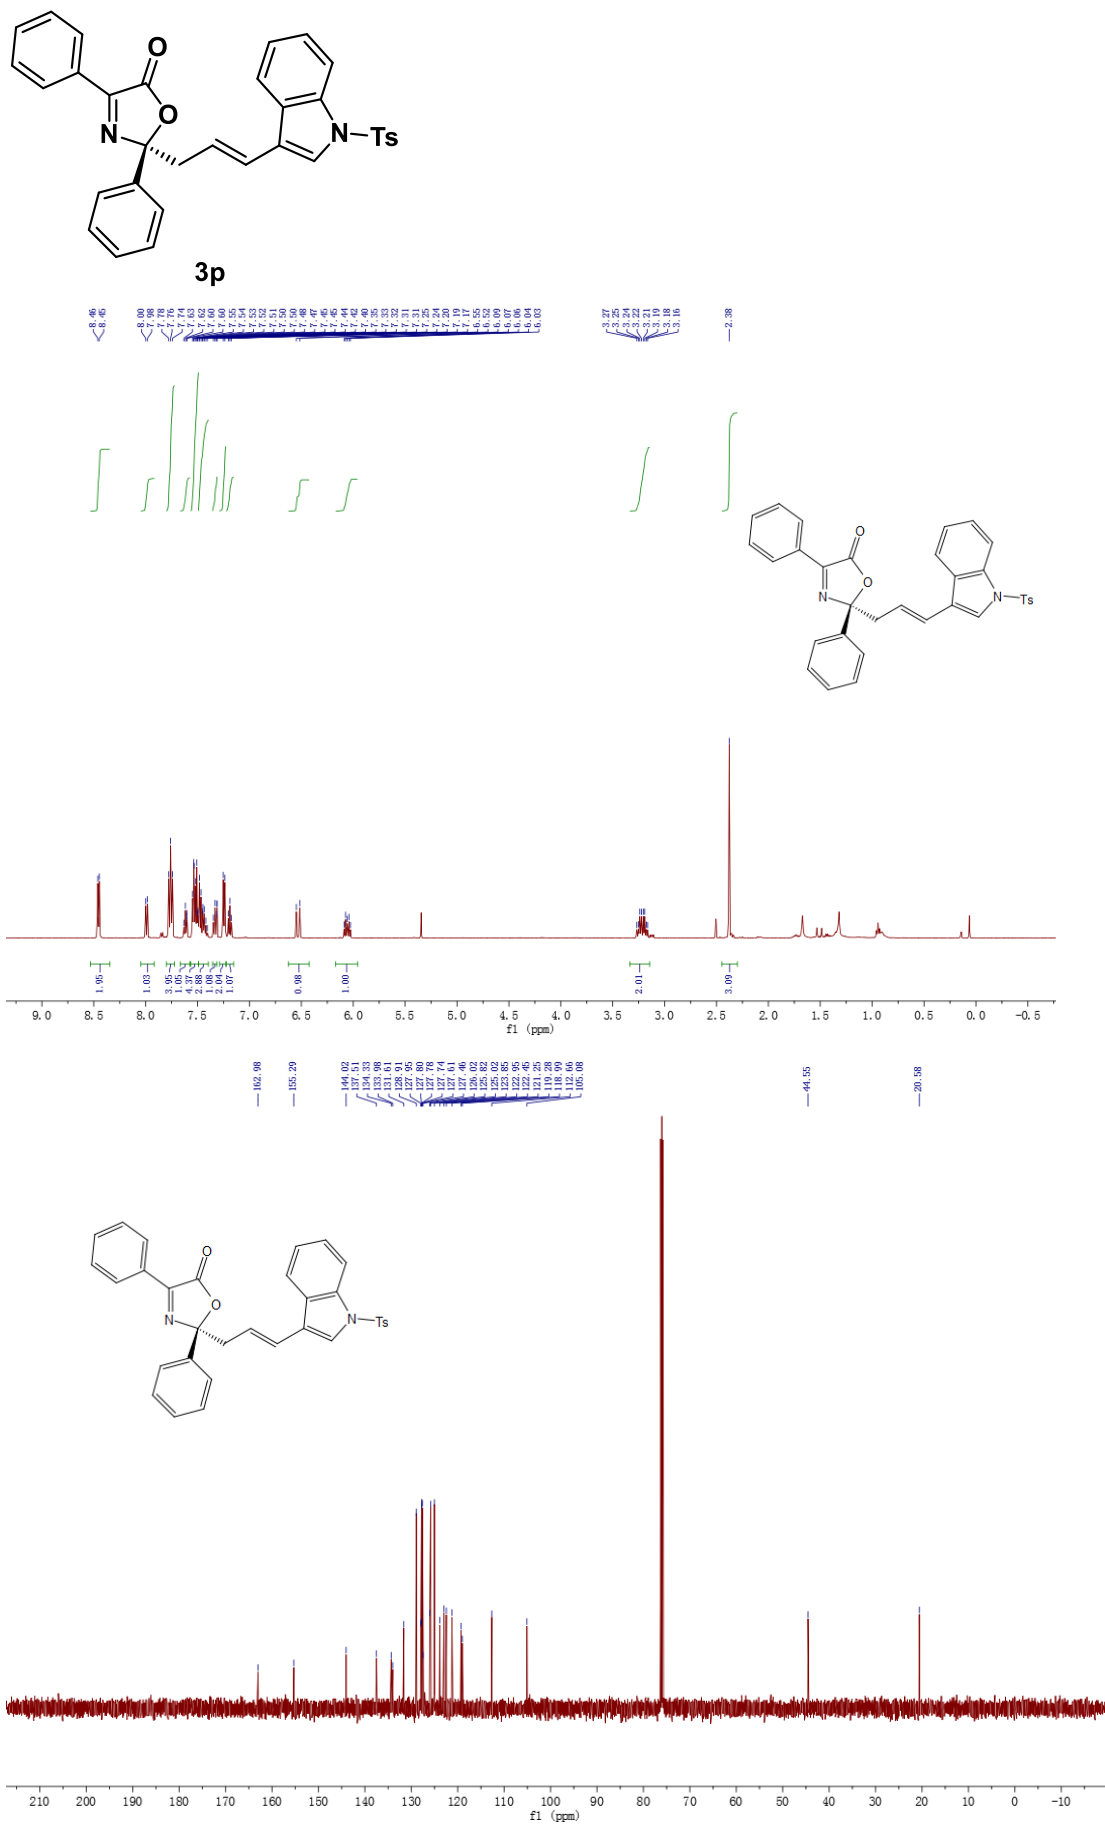



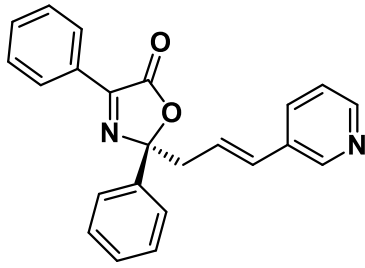

3q

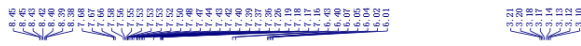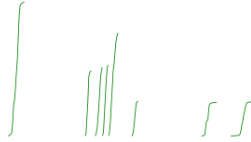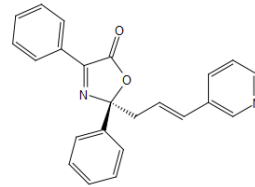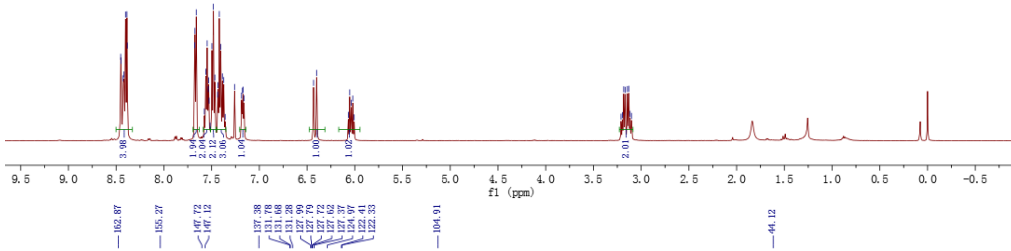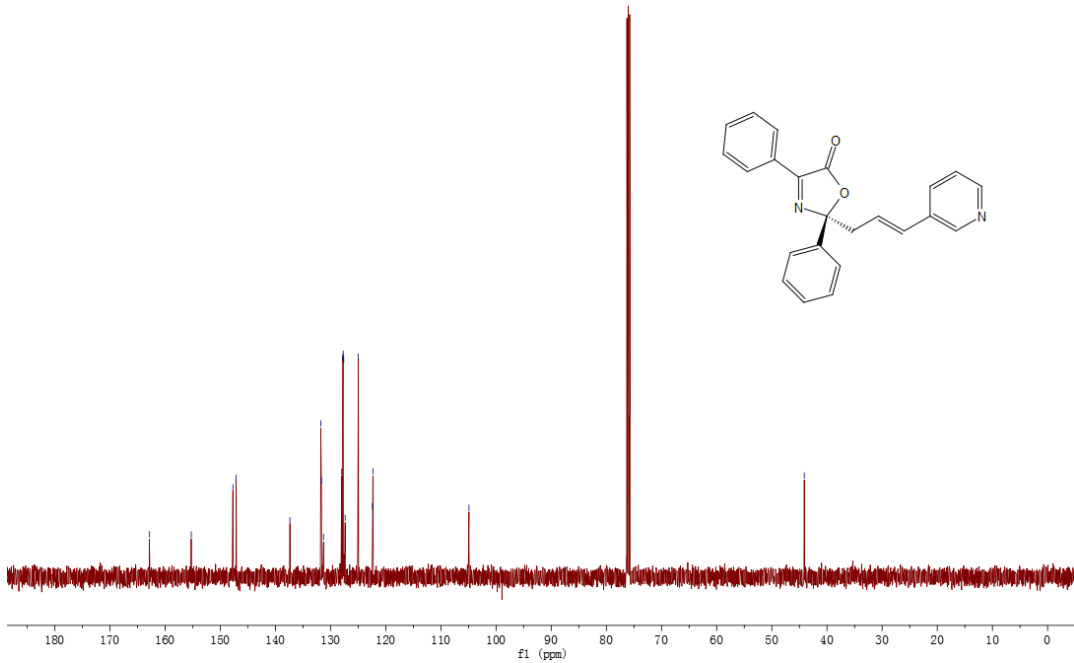

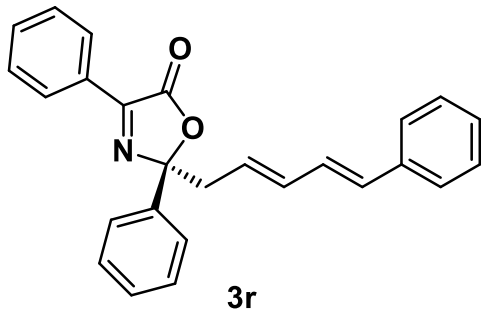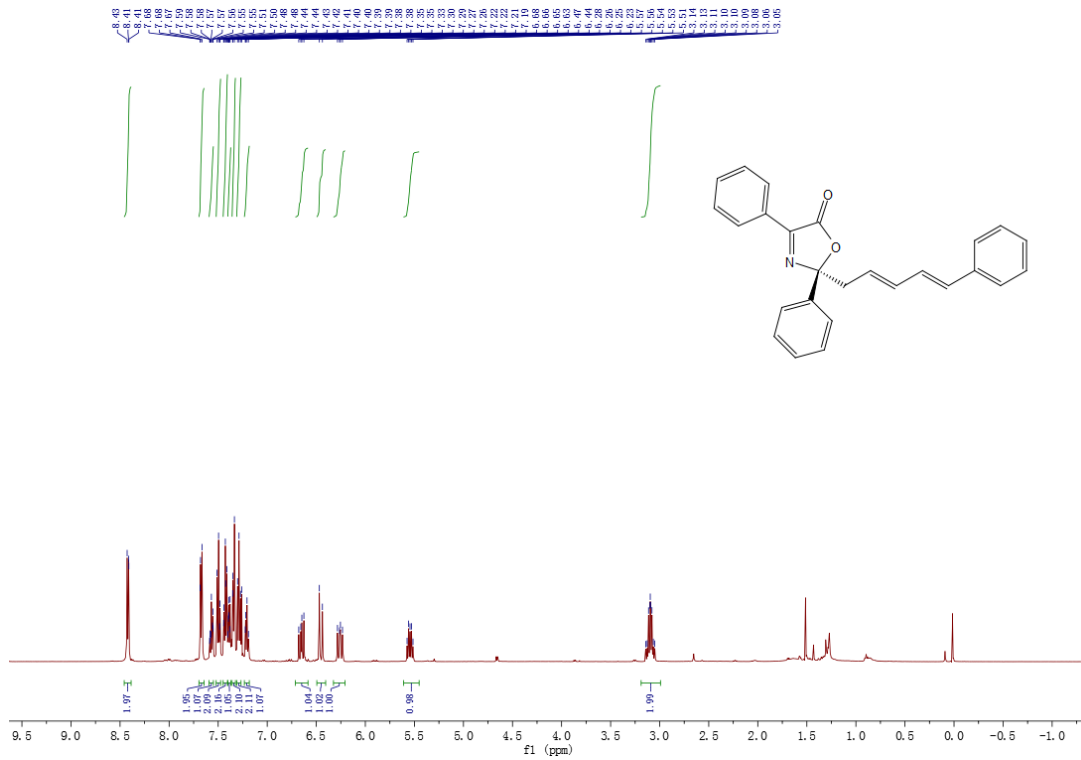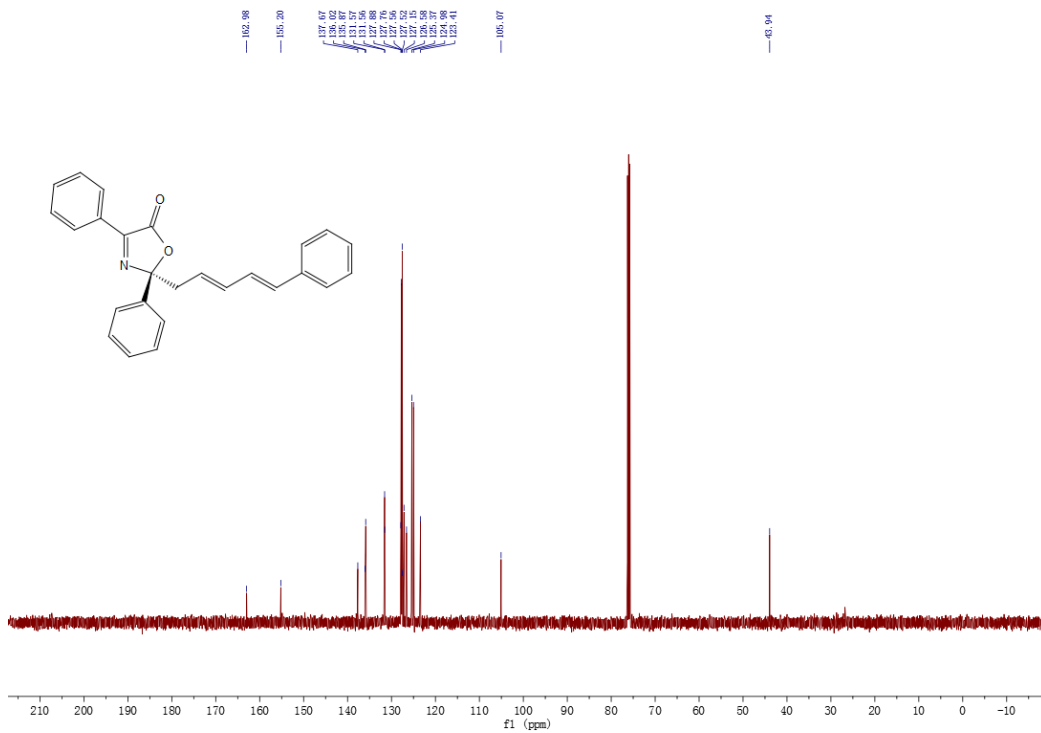

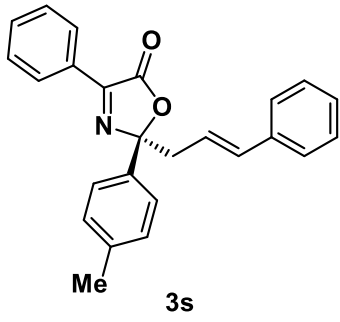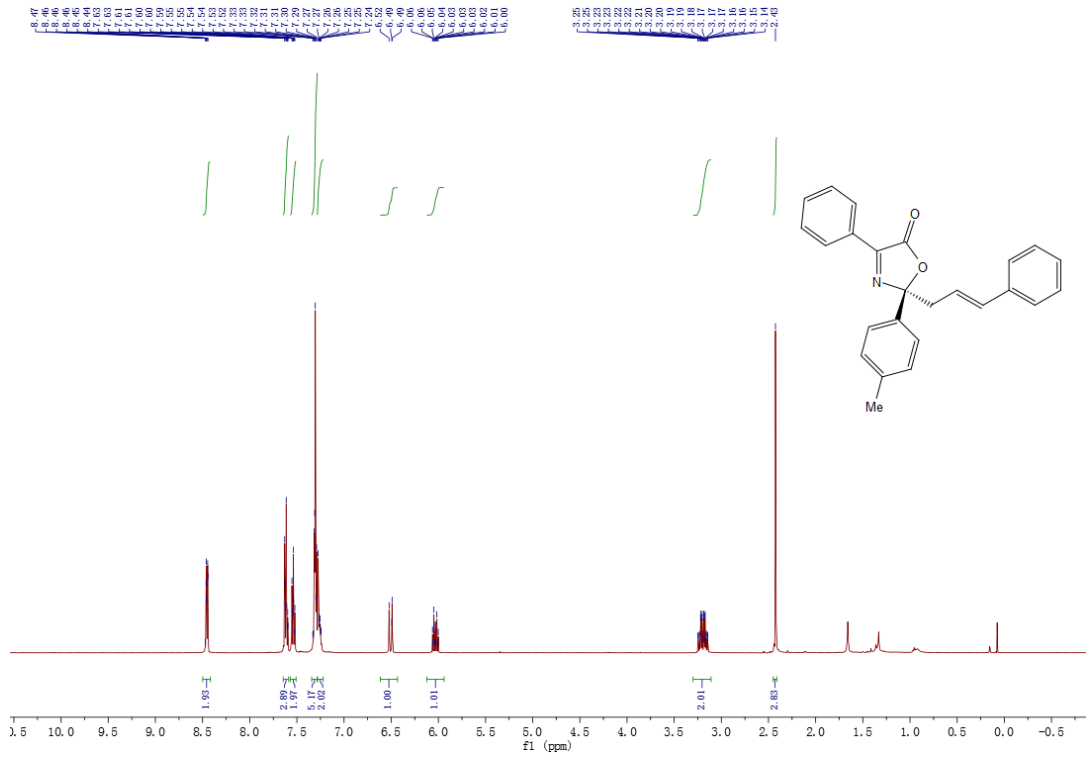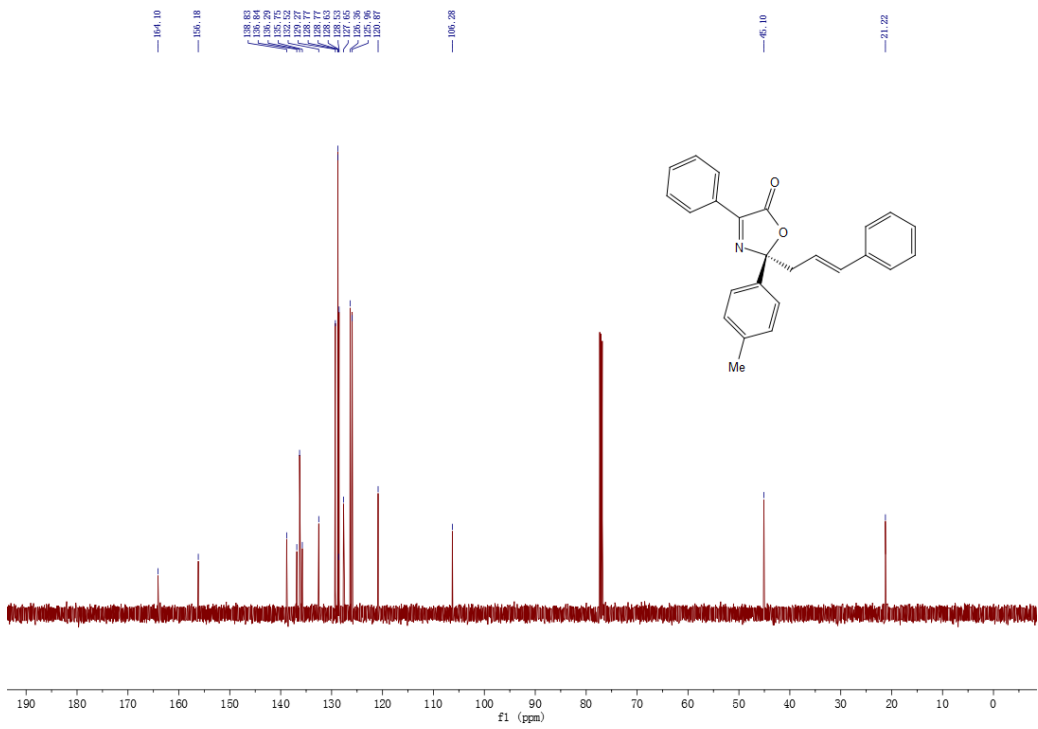

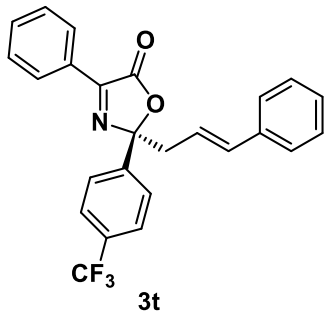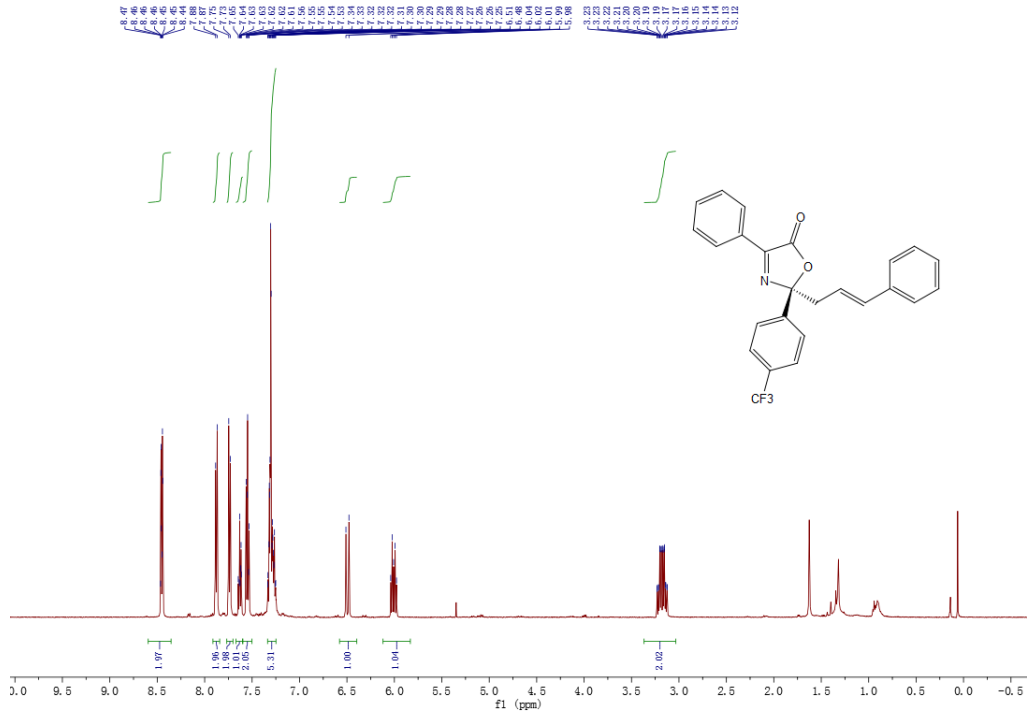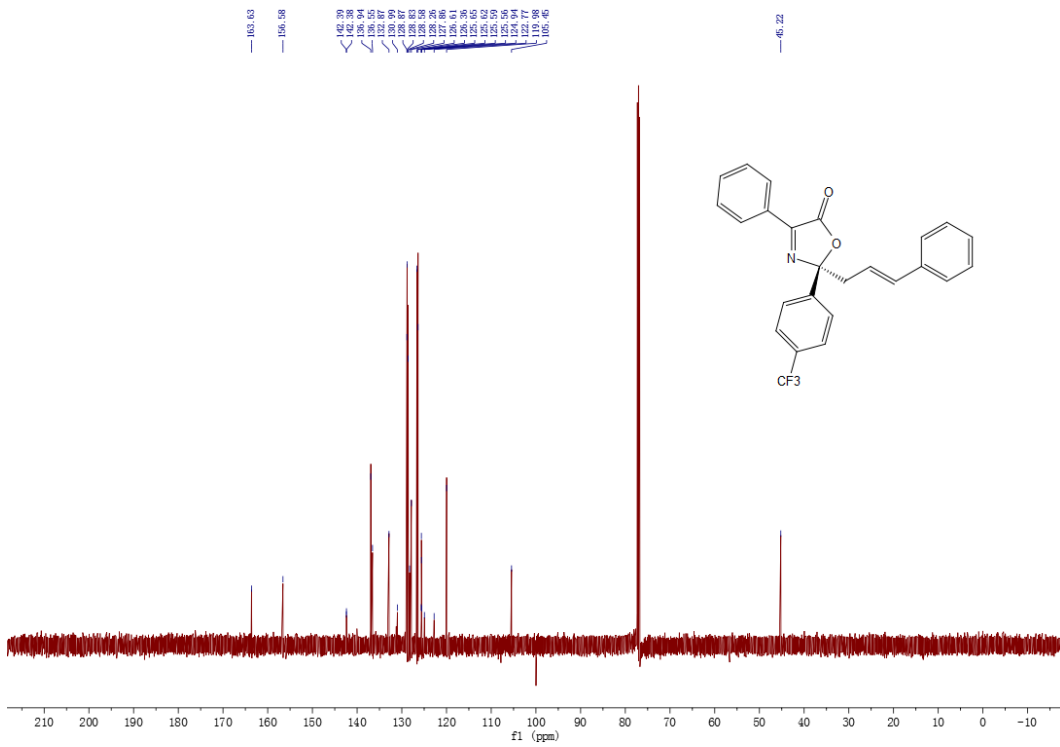

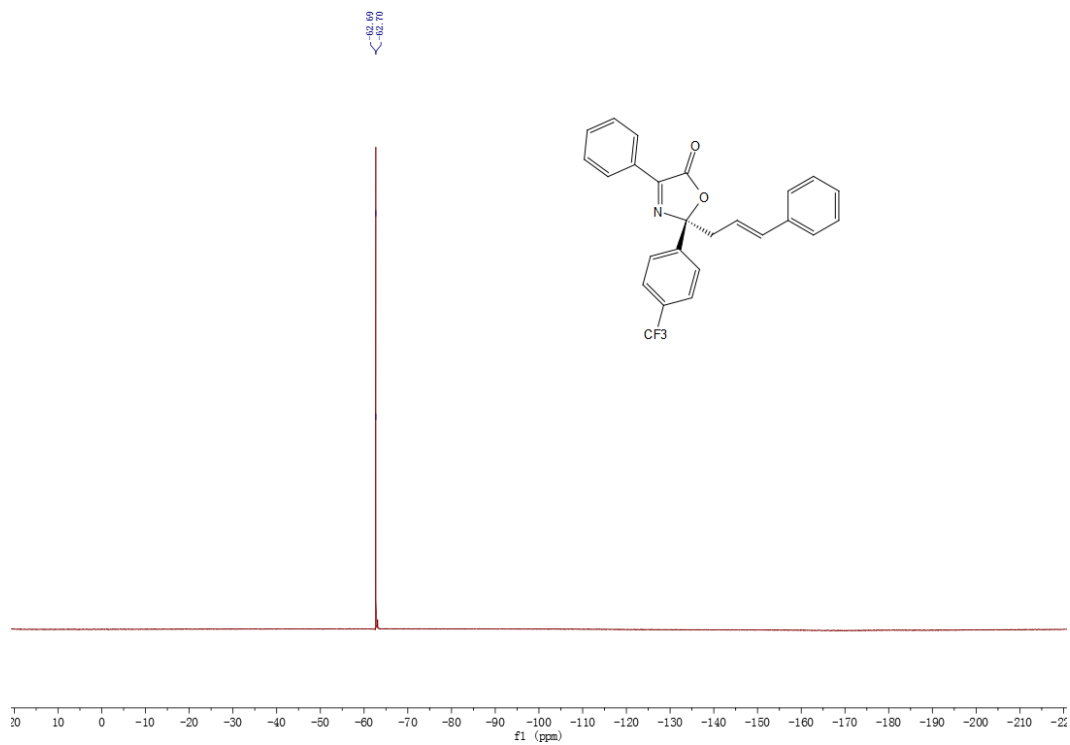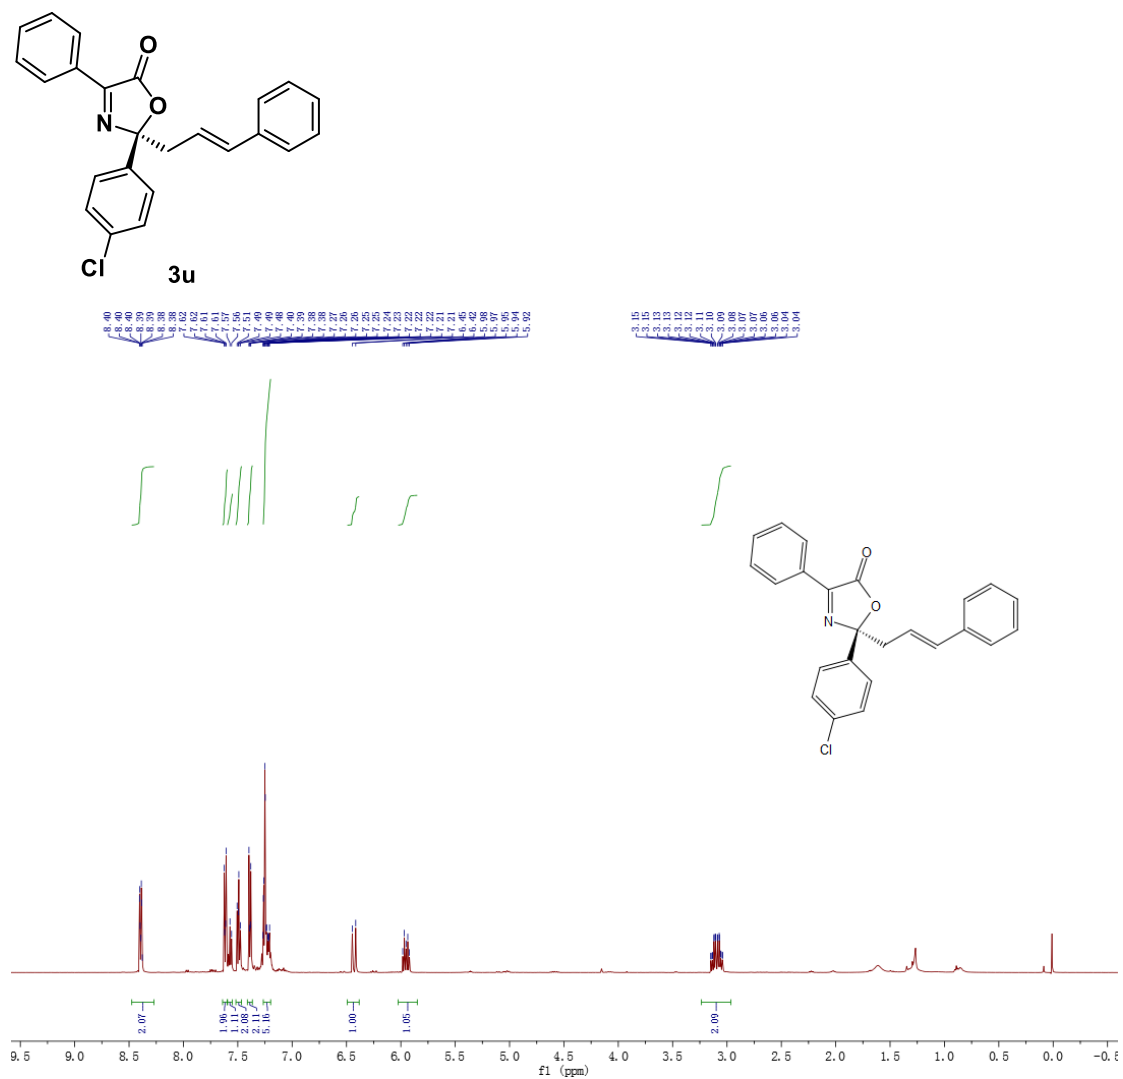

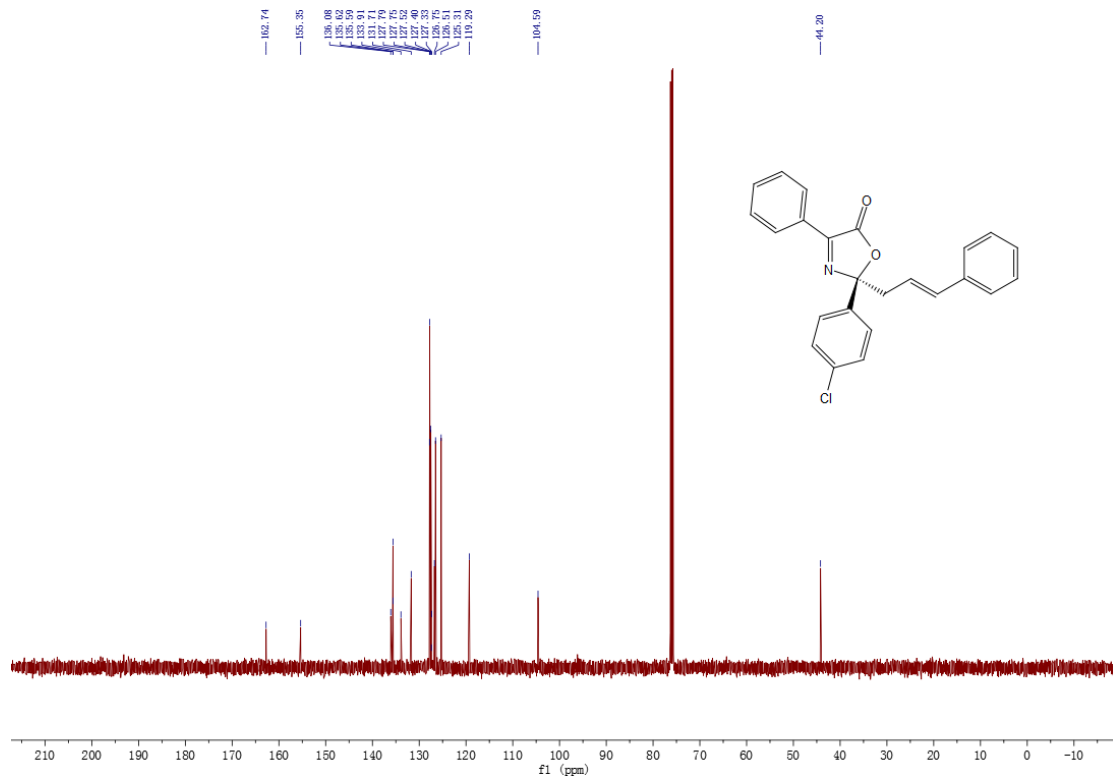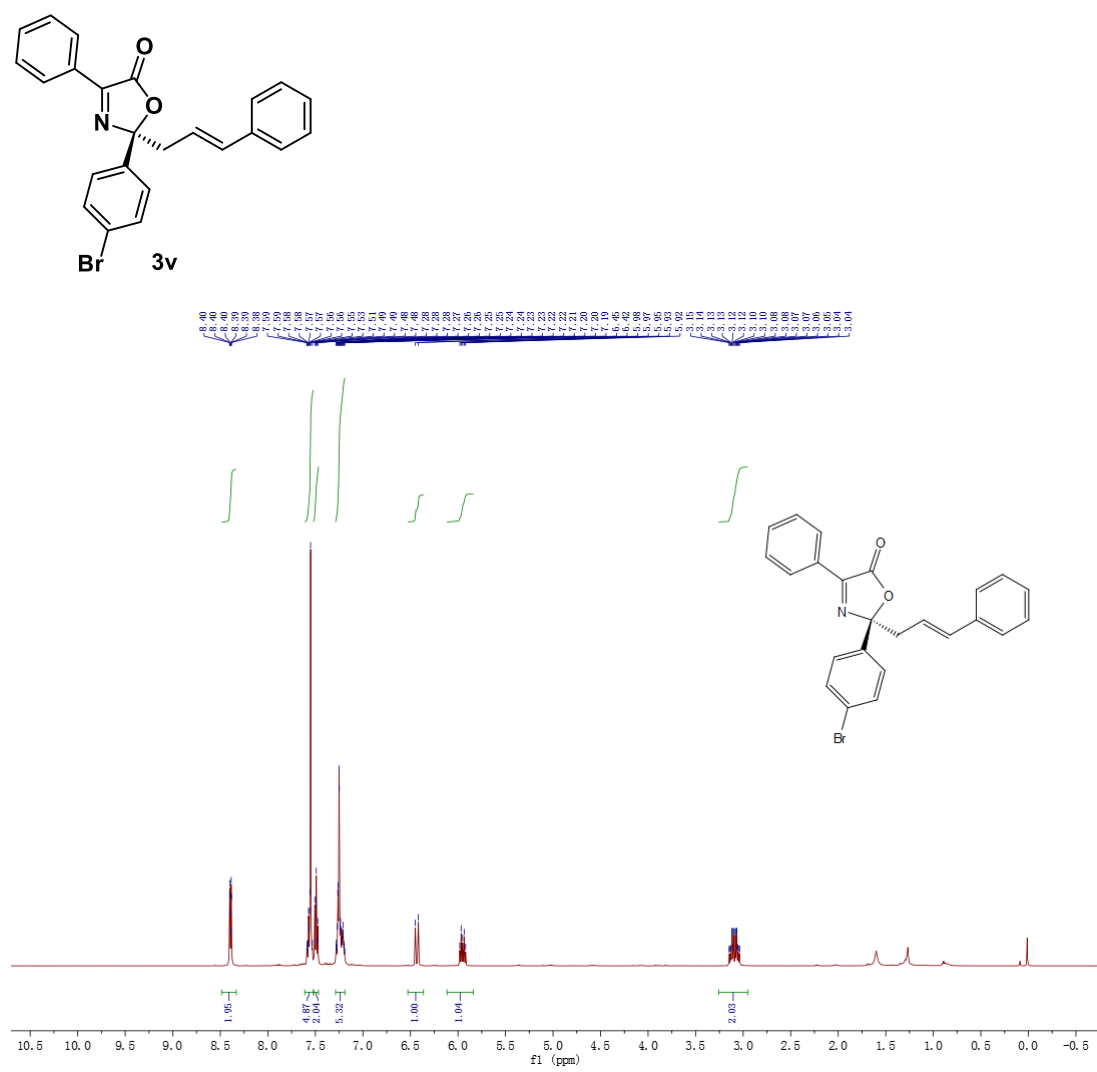

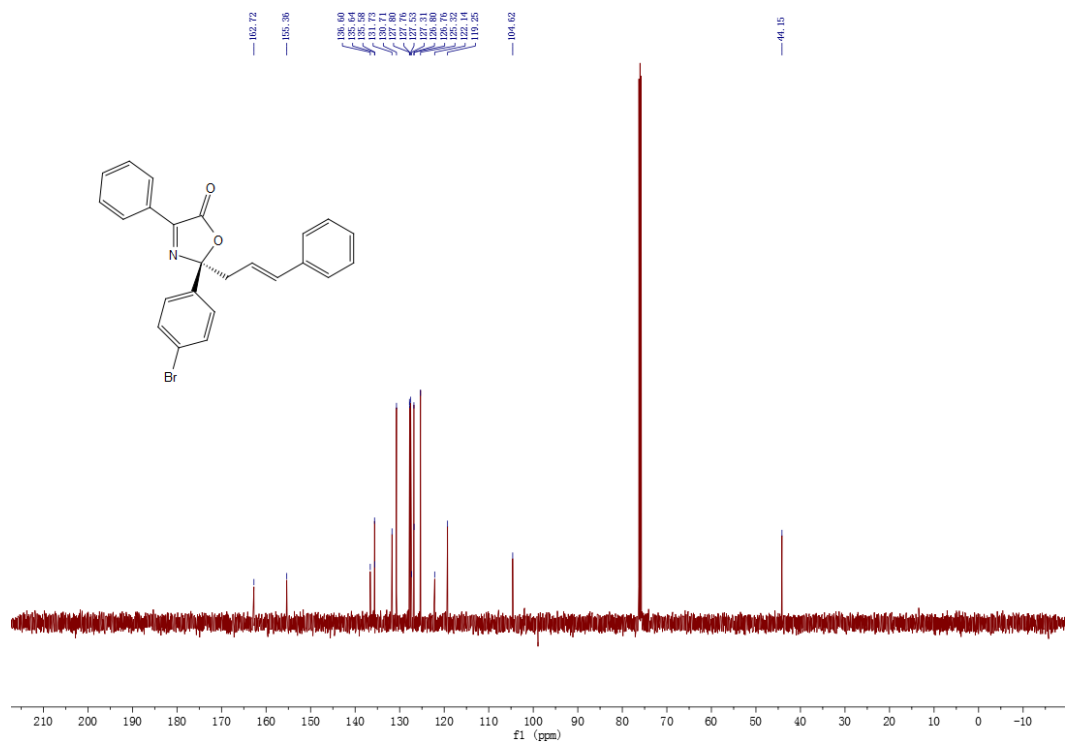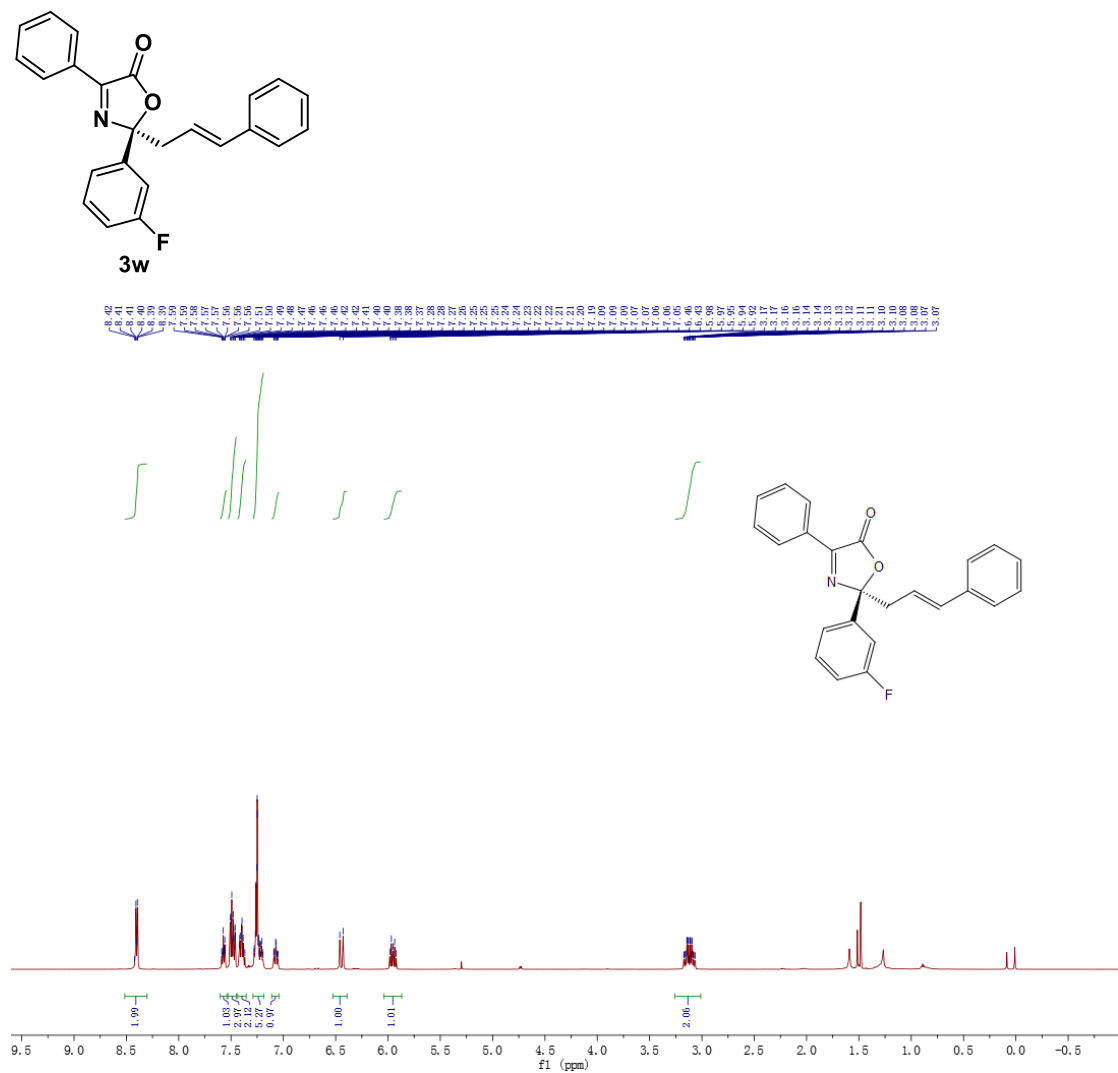

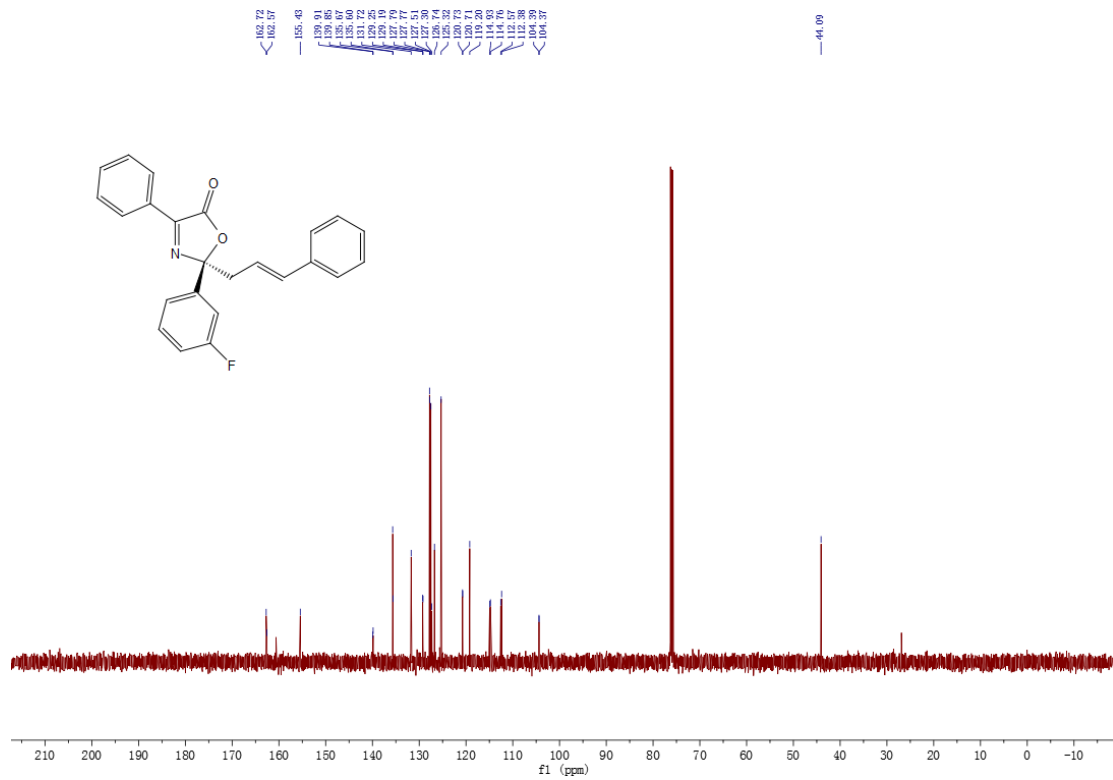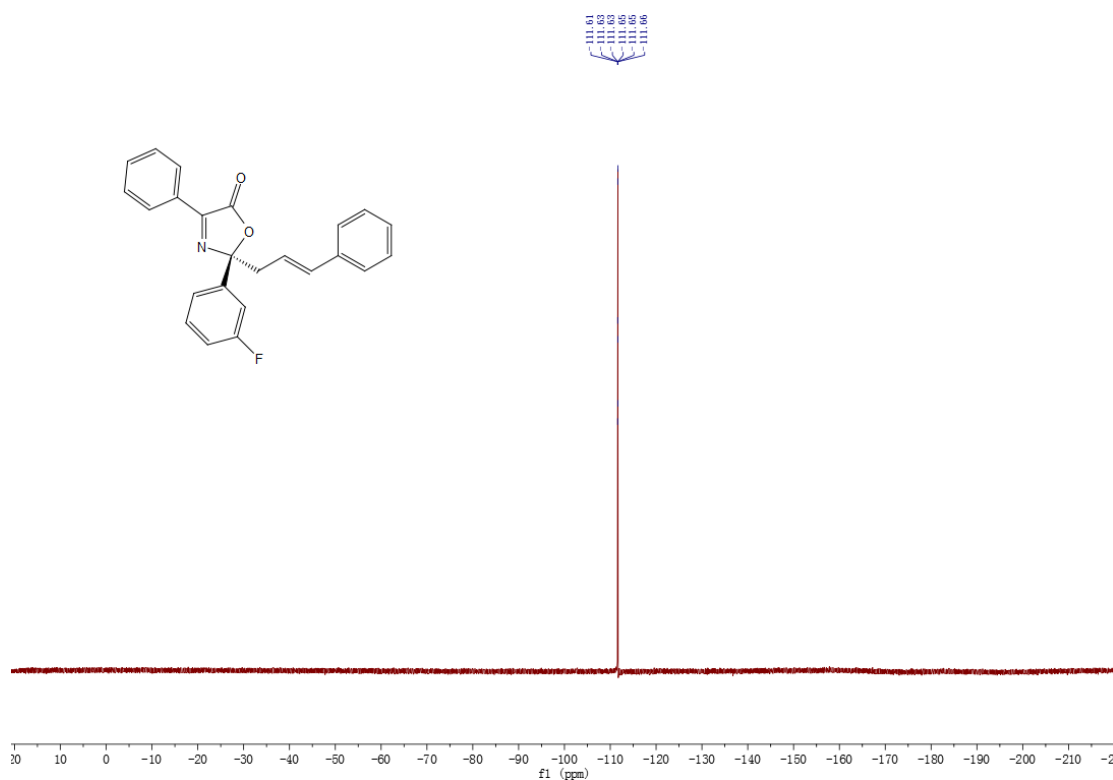



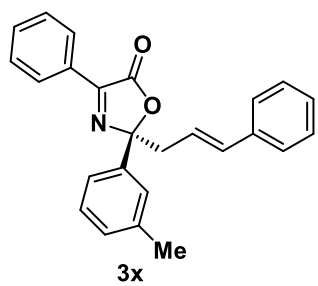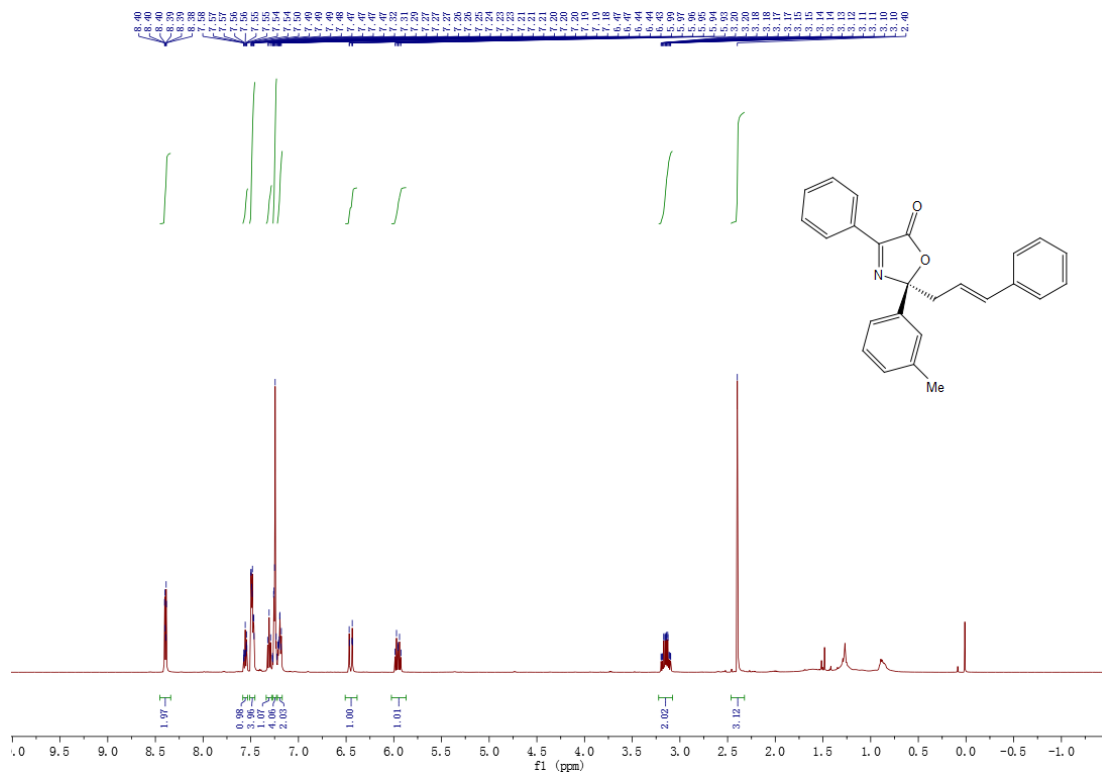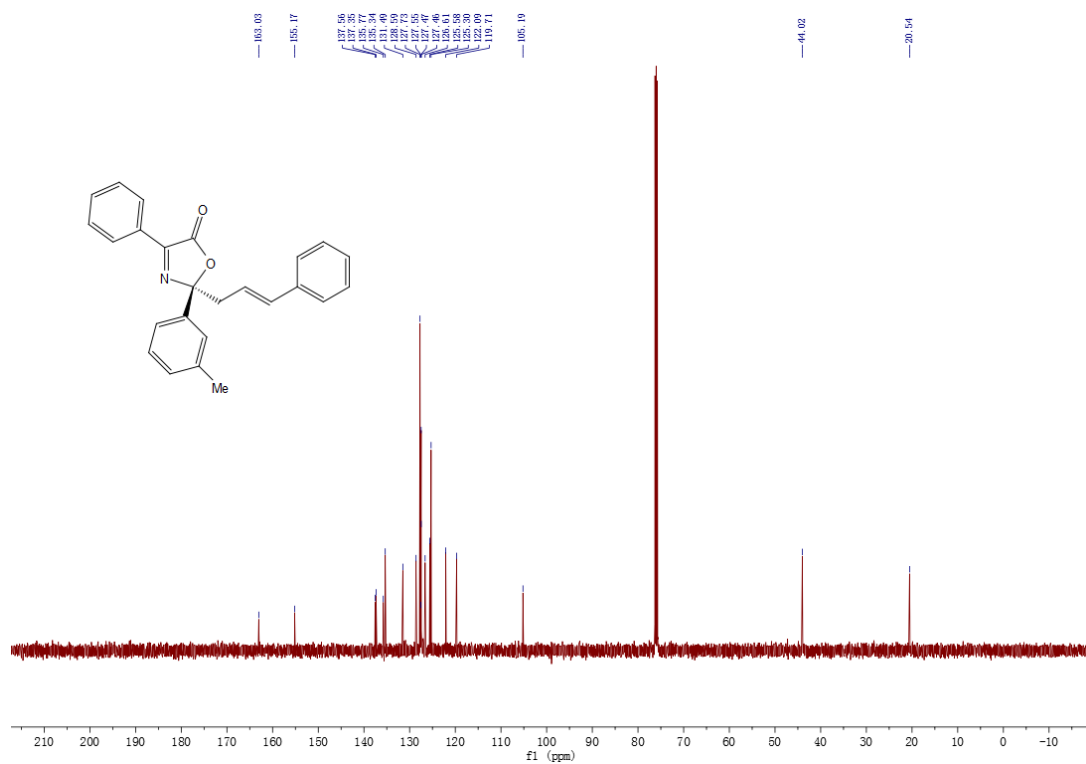



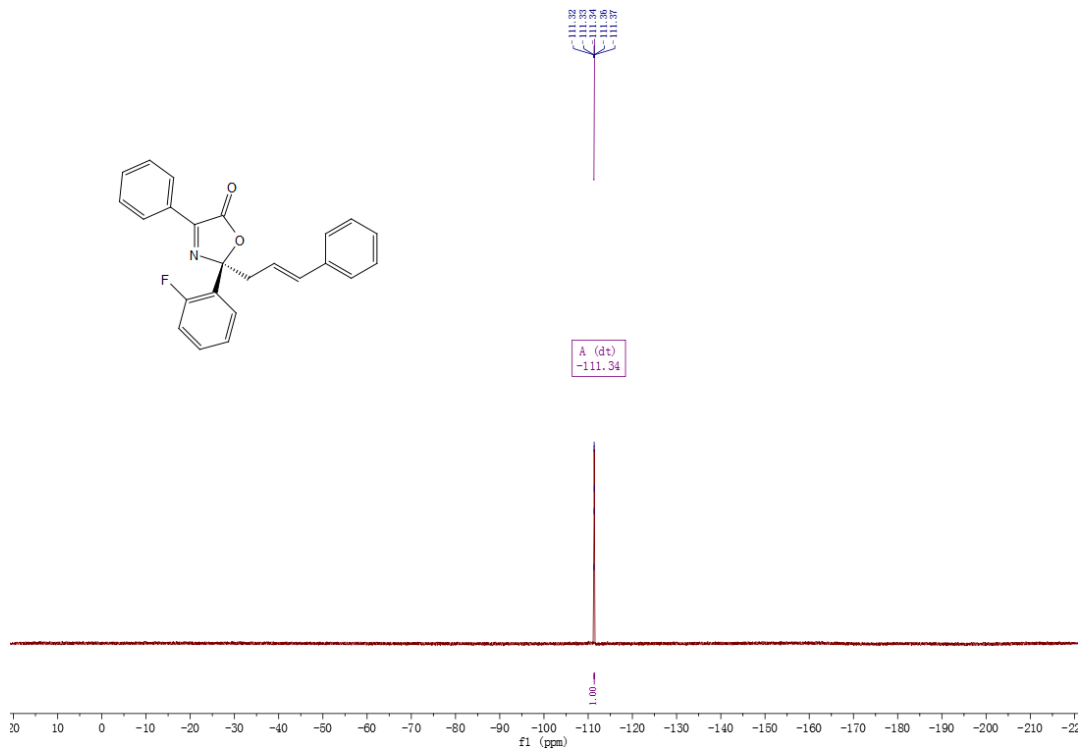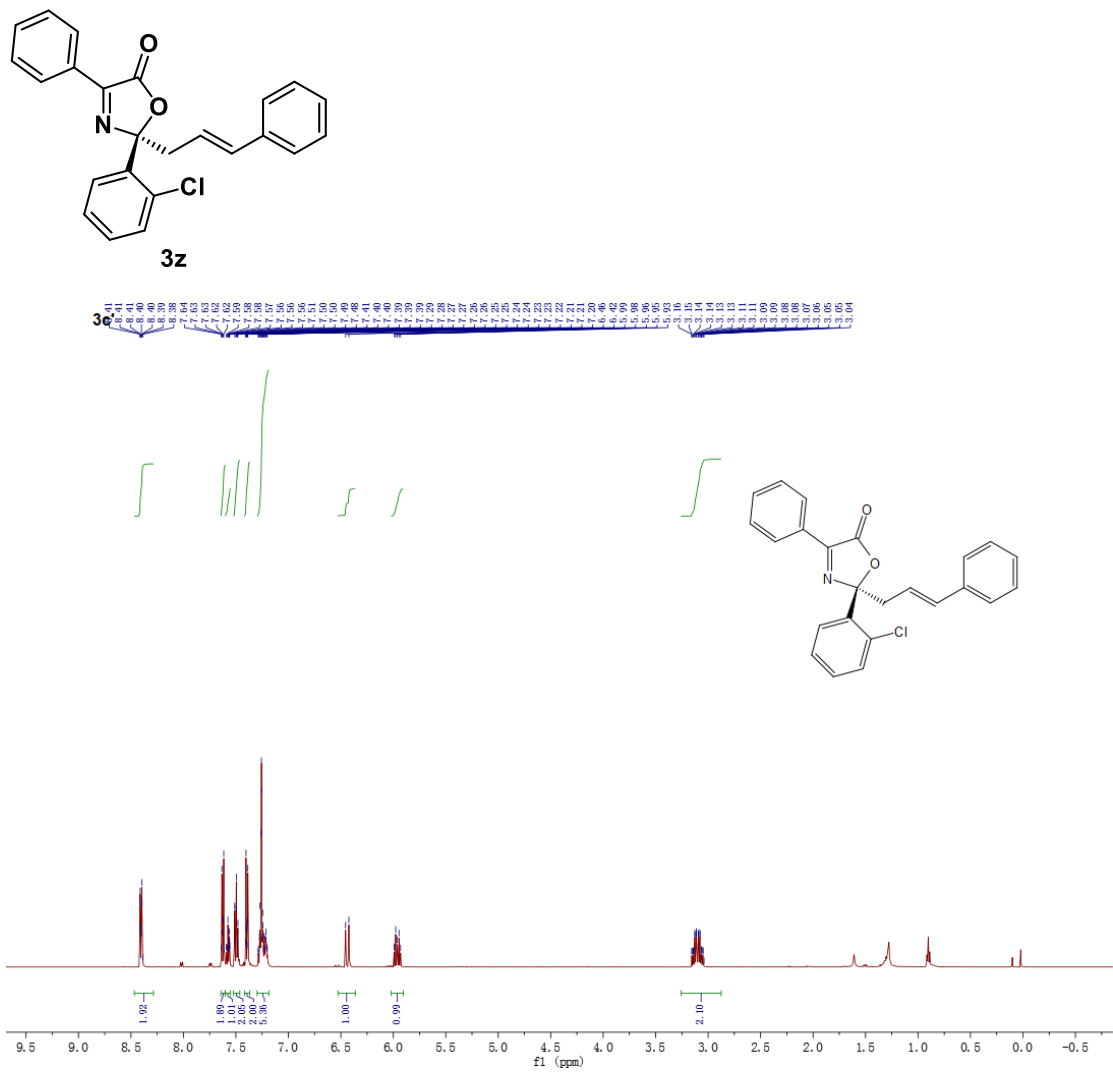



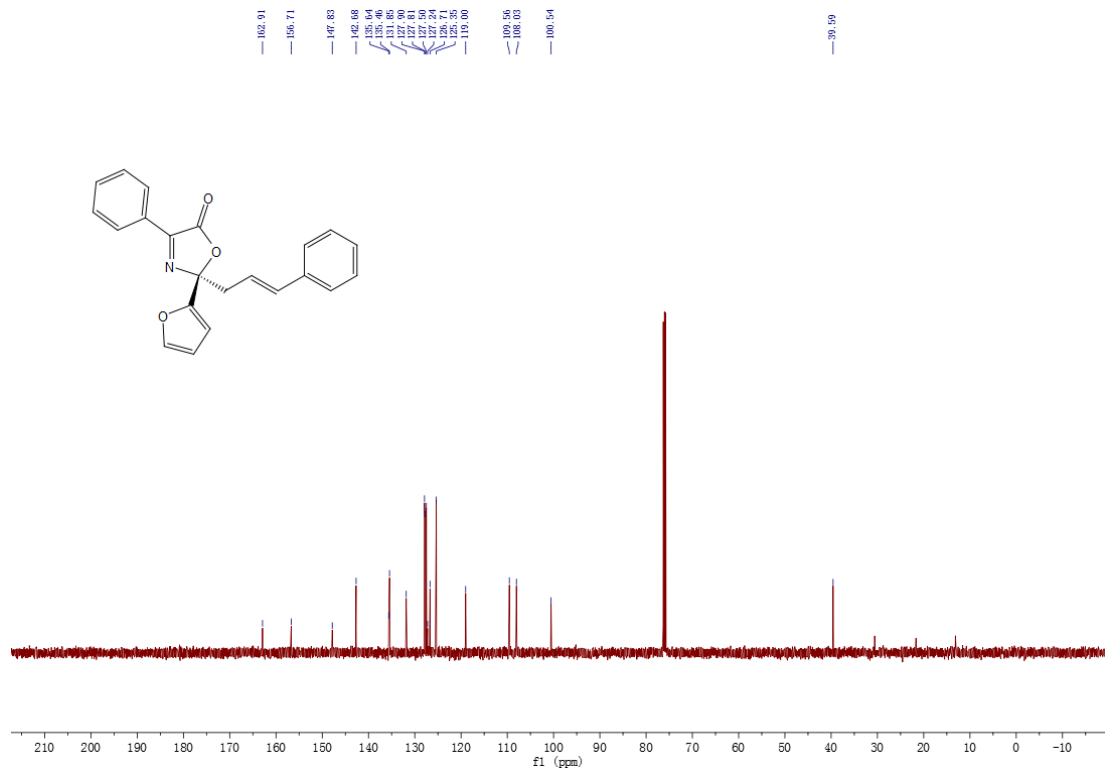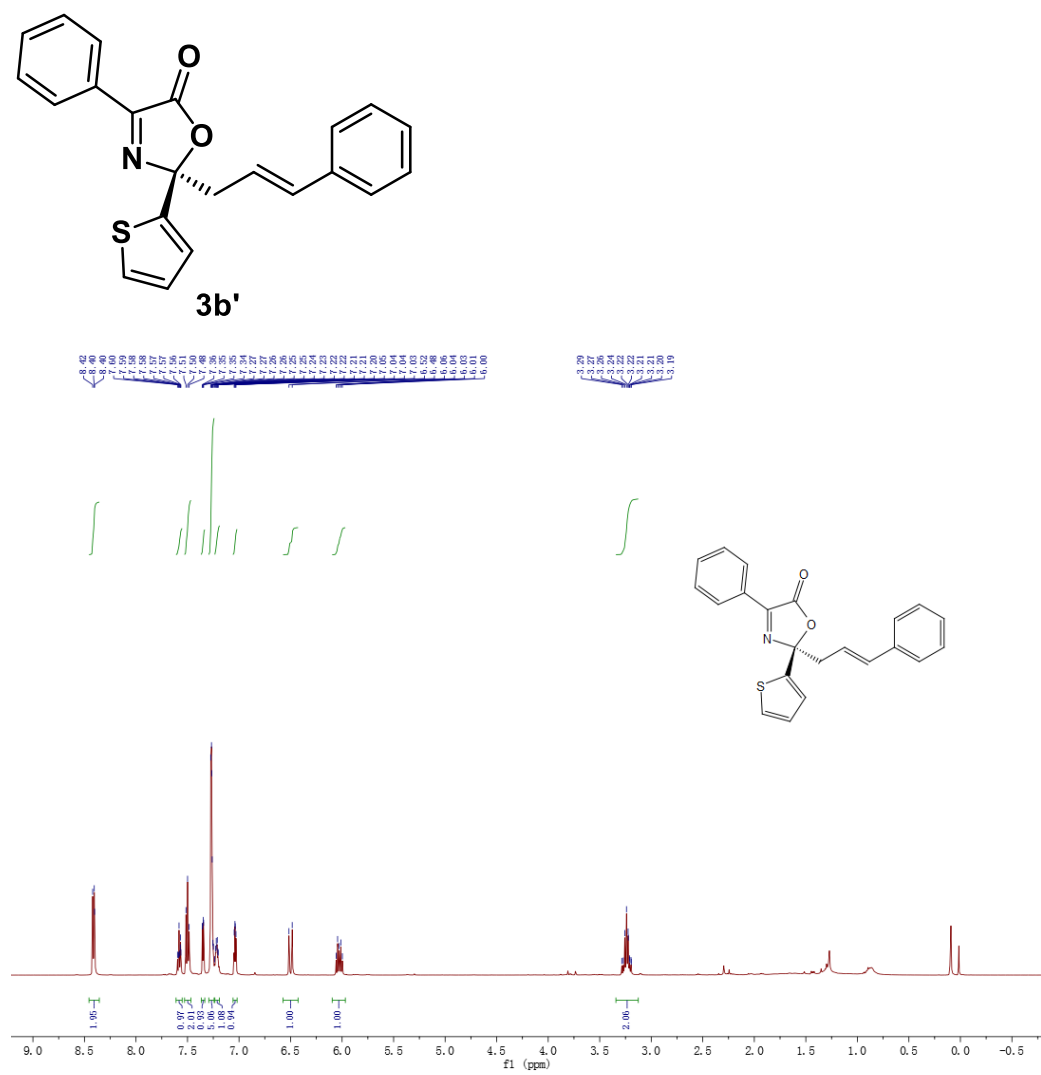



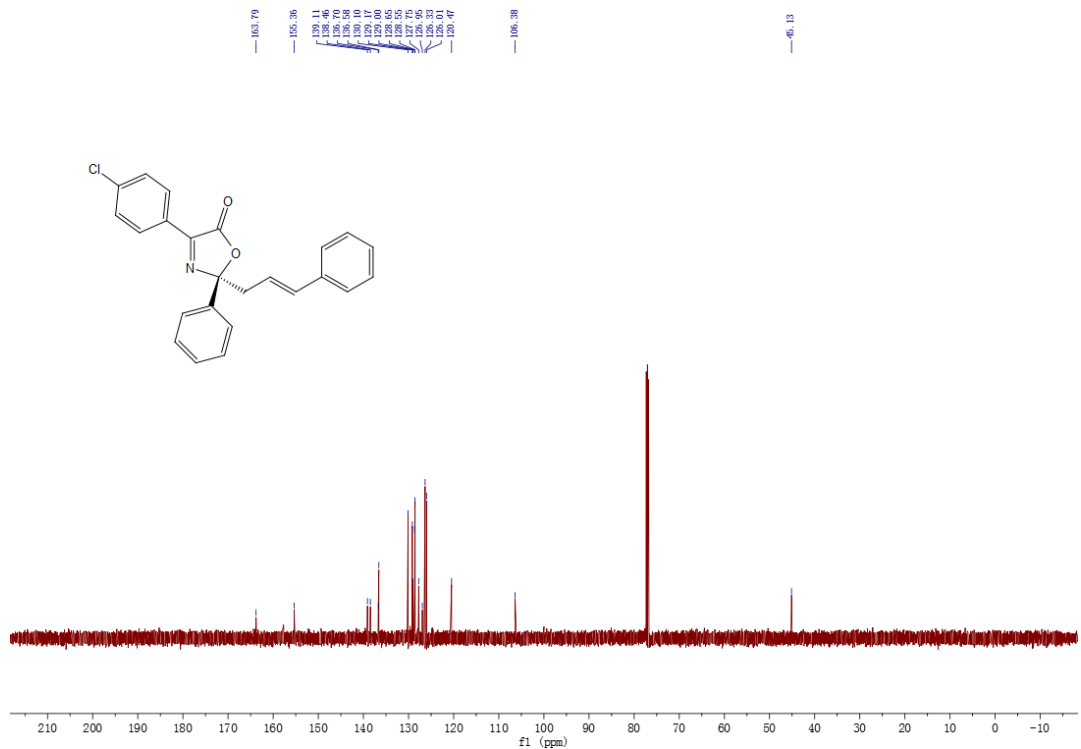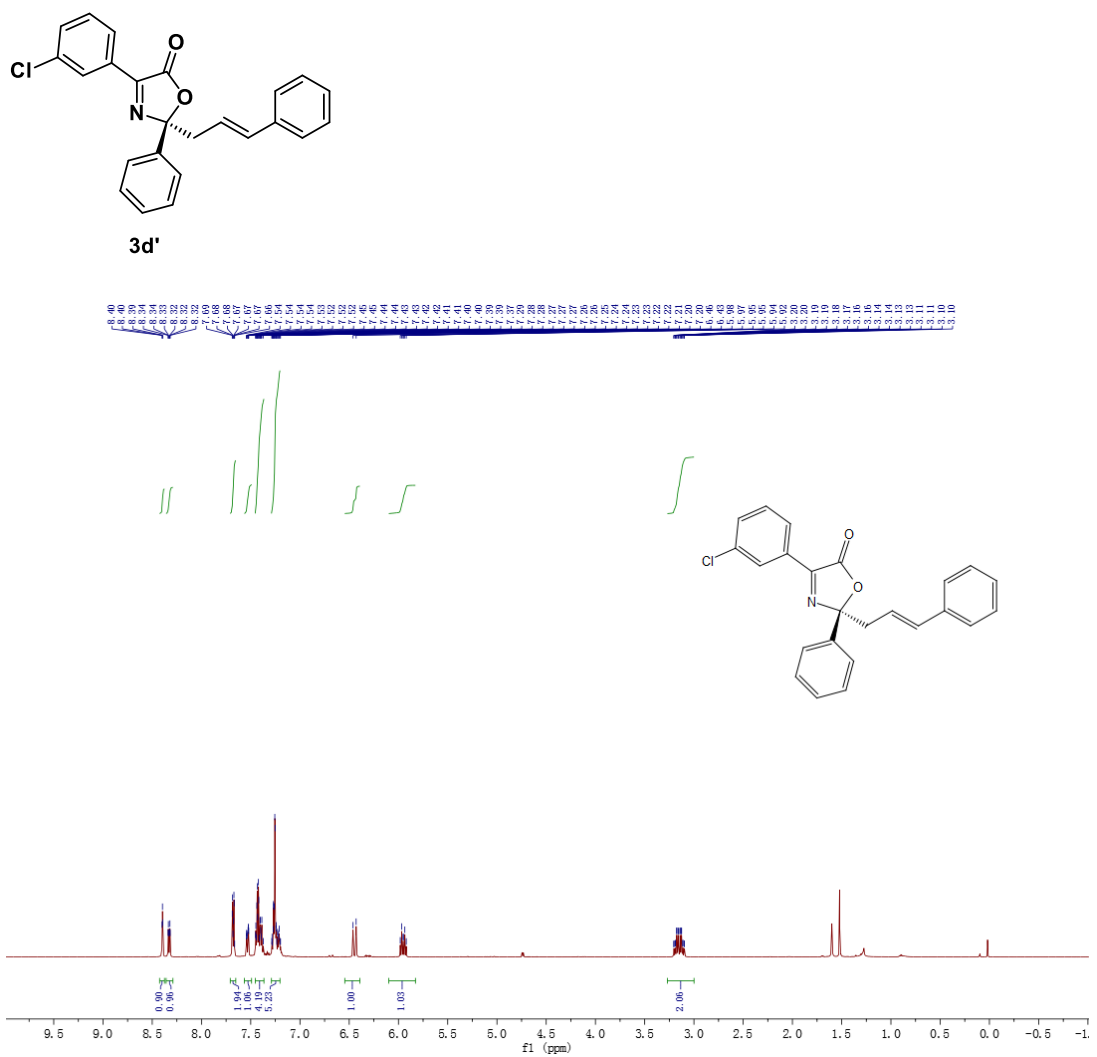

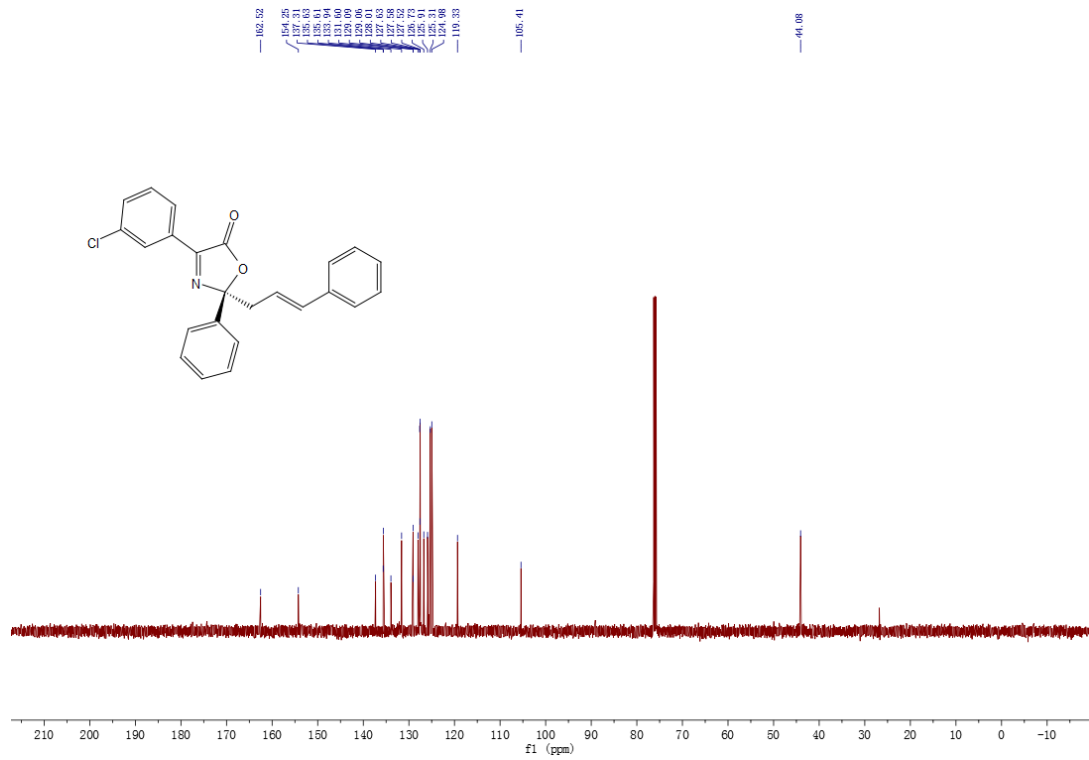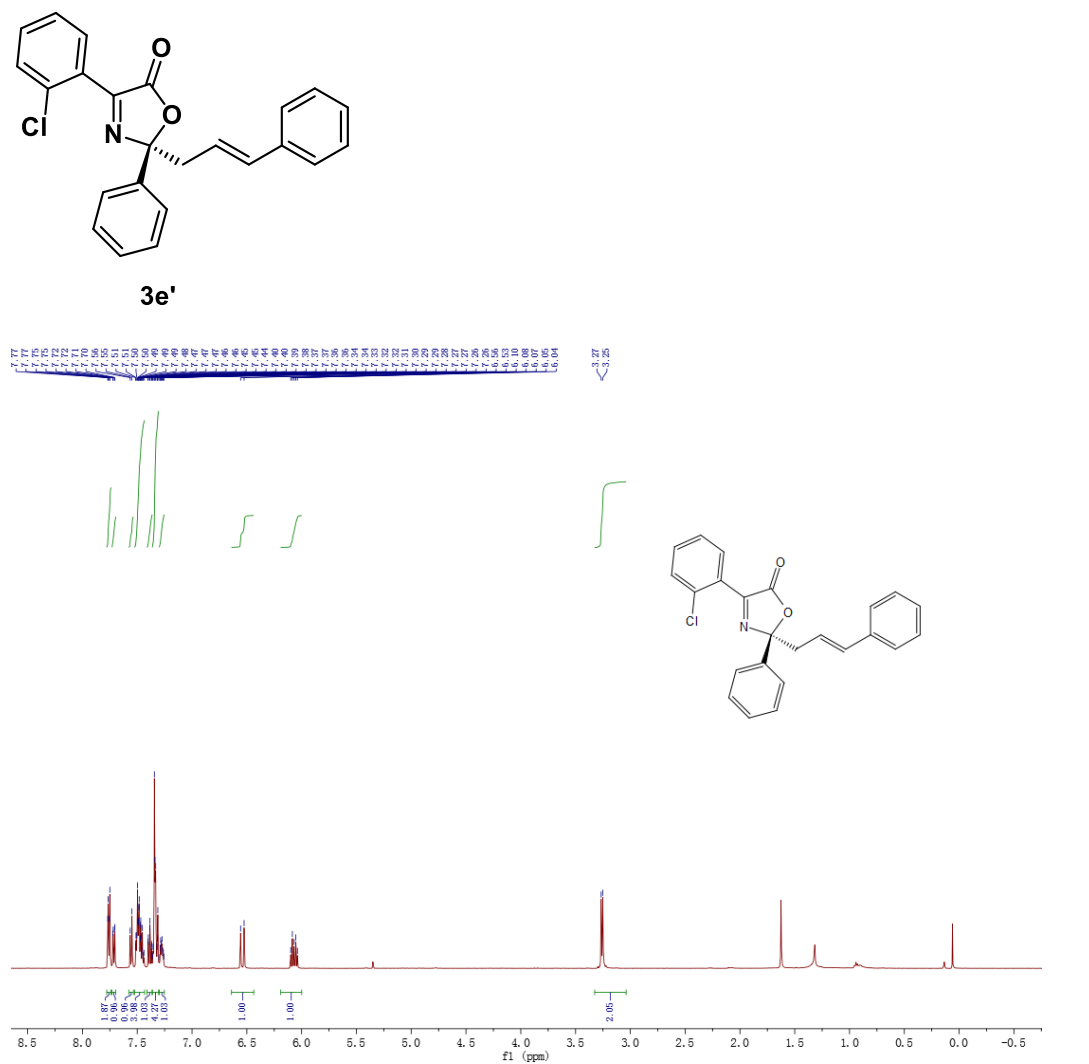



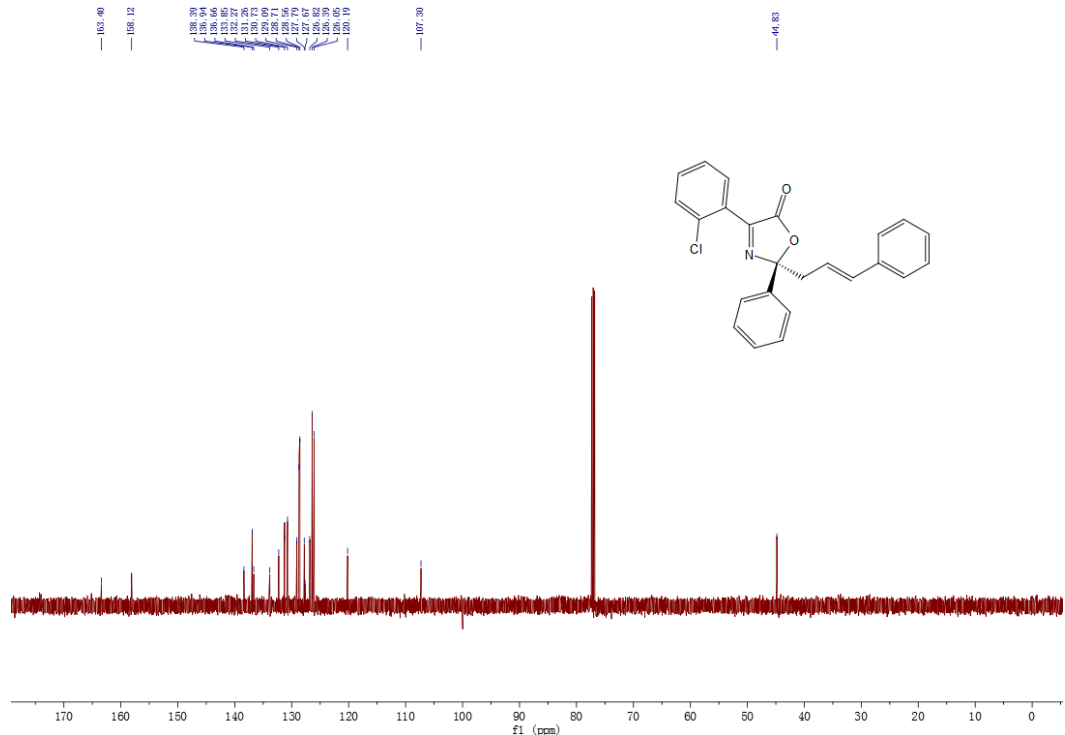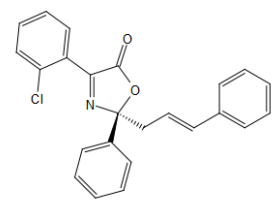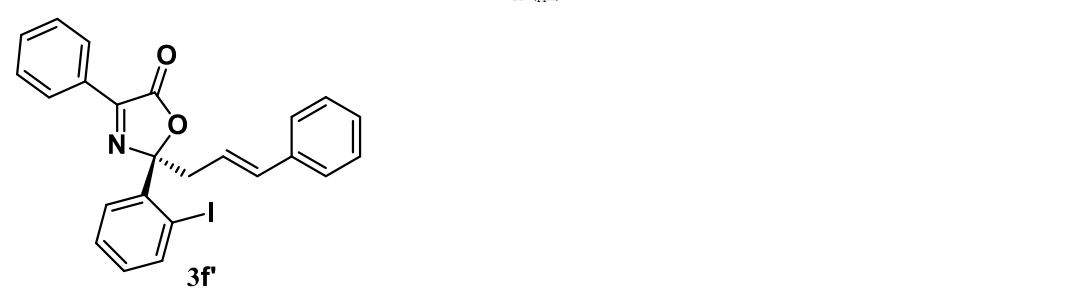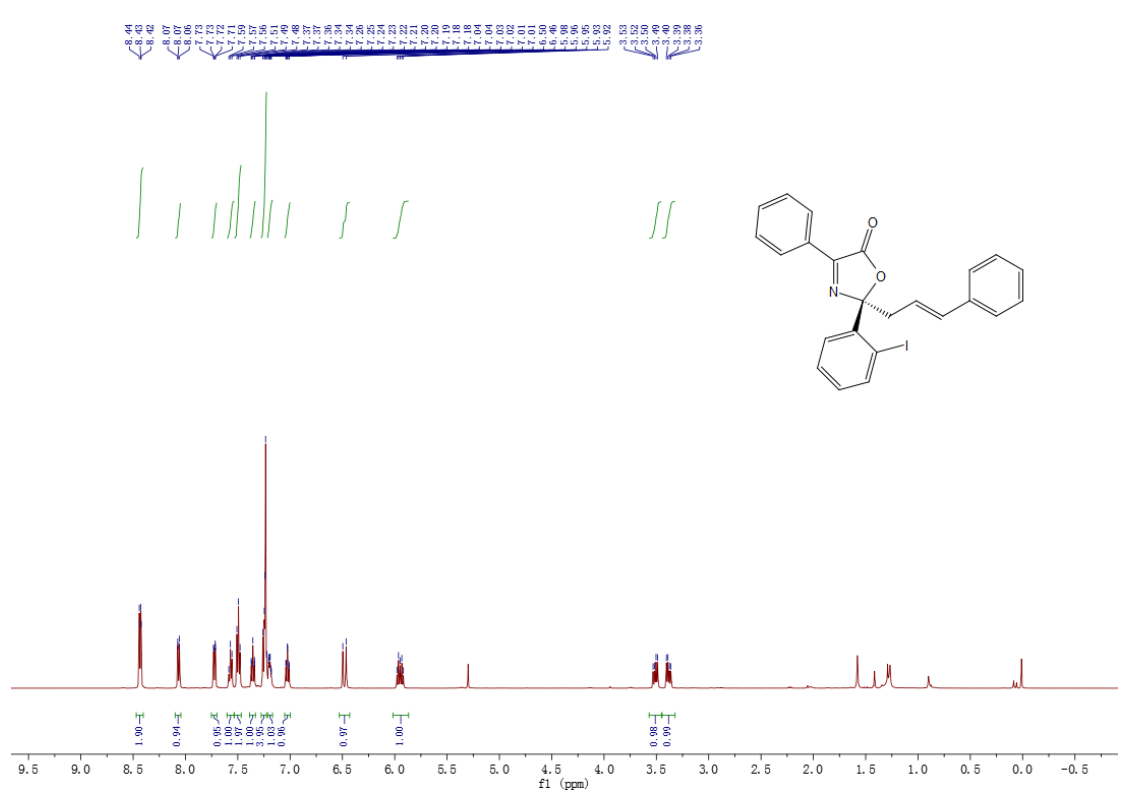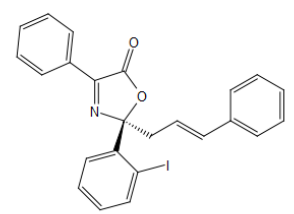

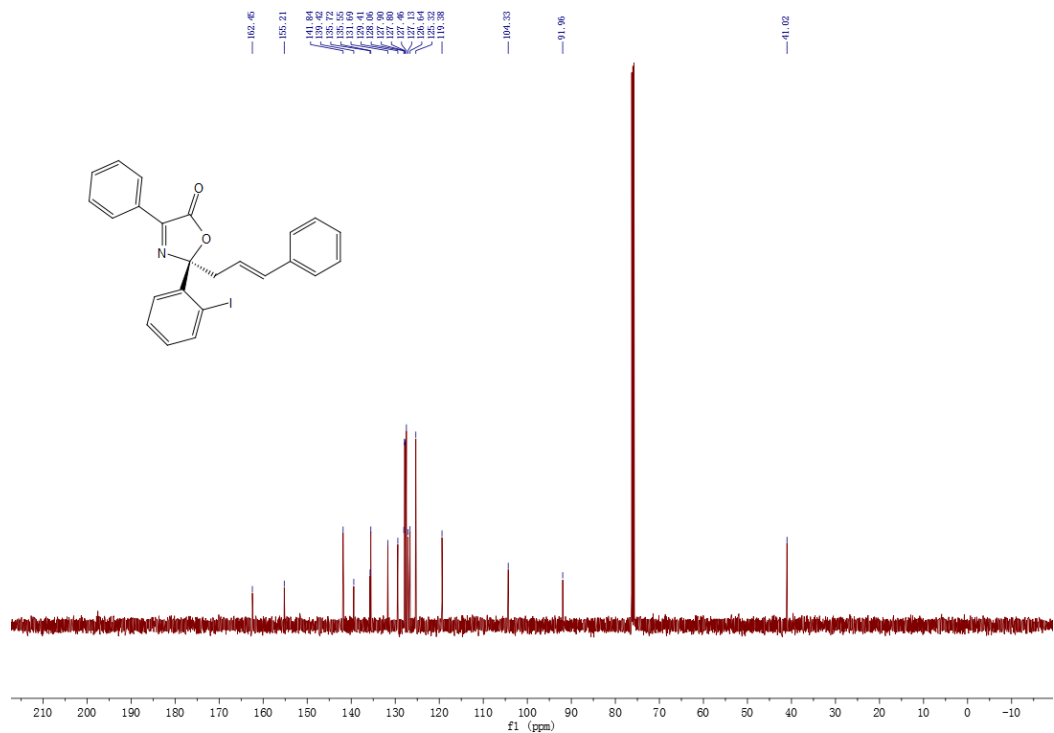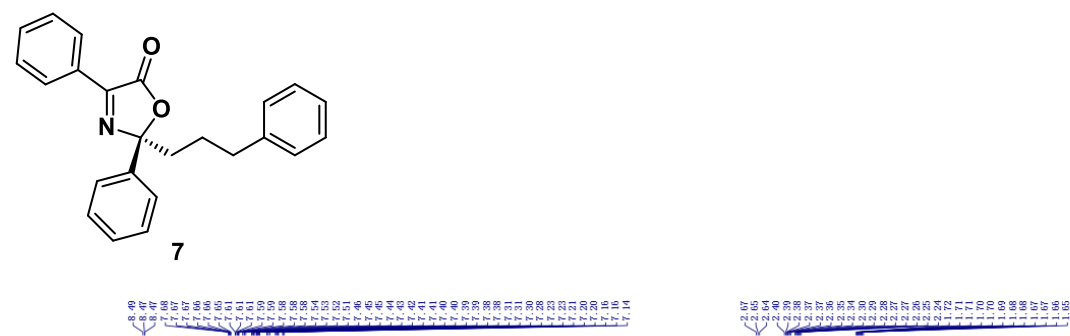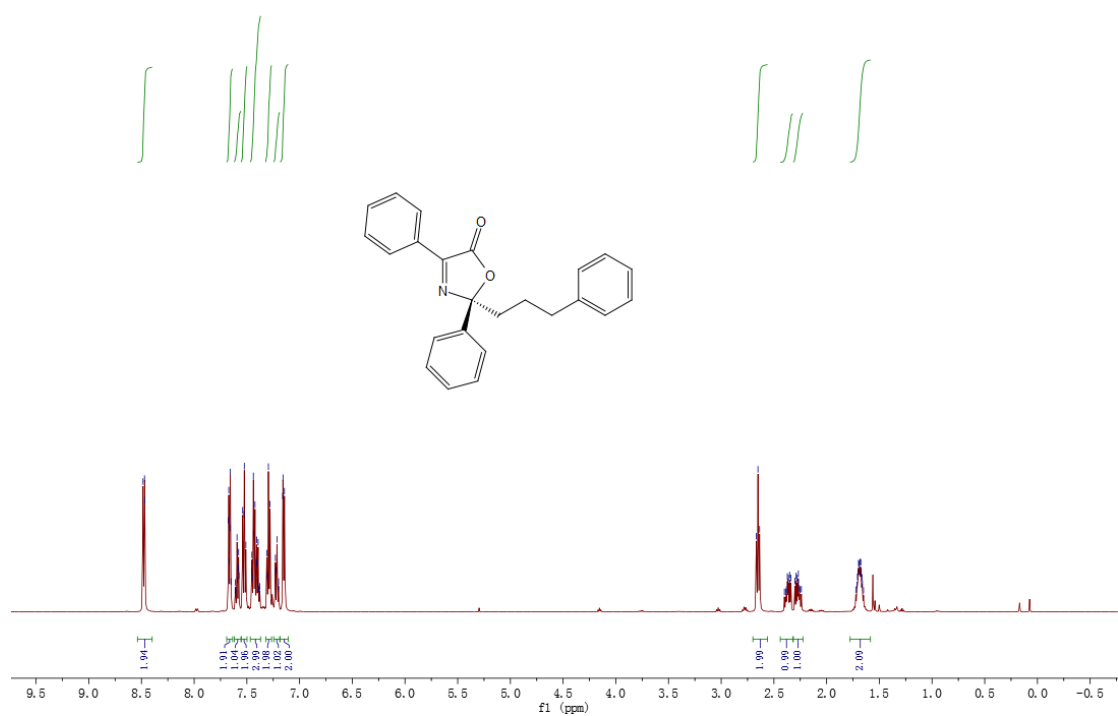

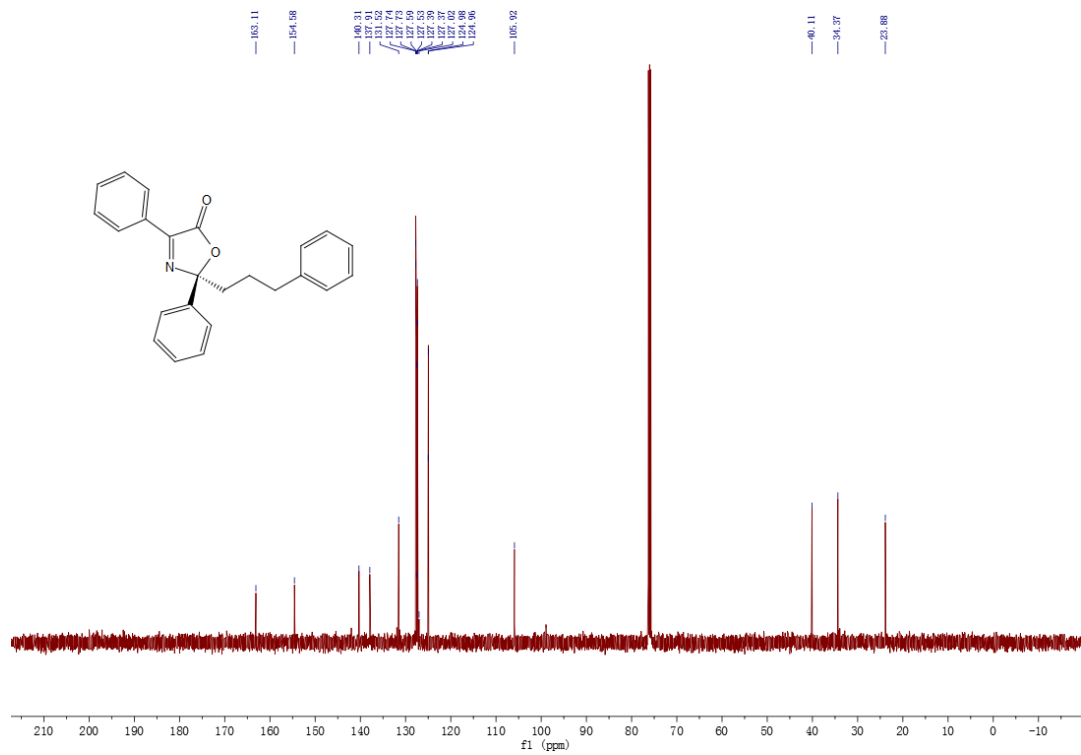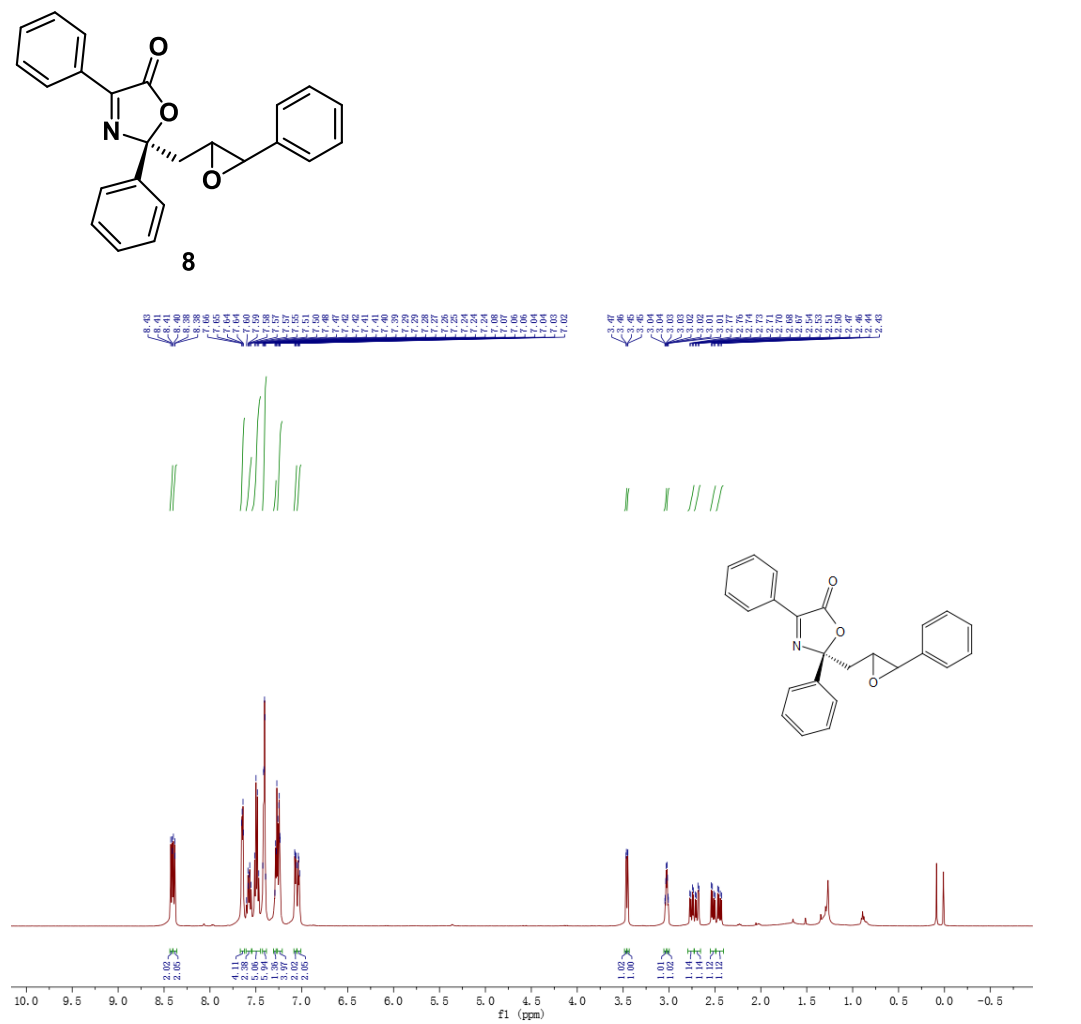

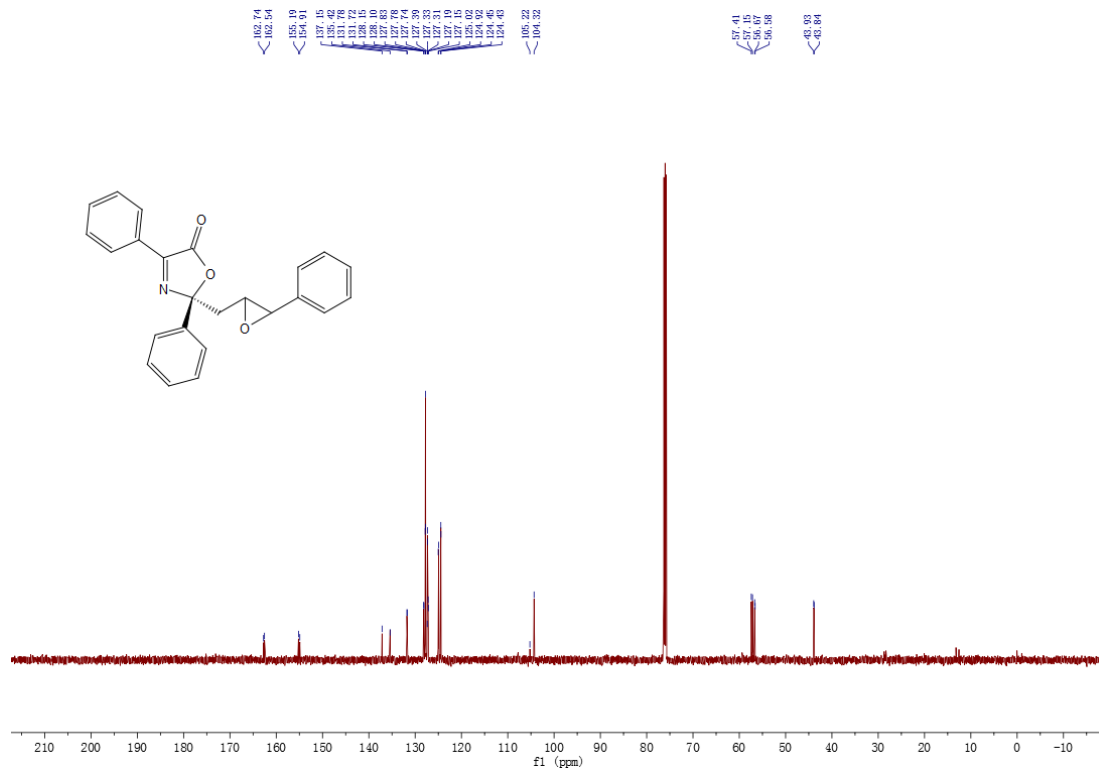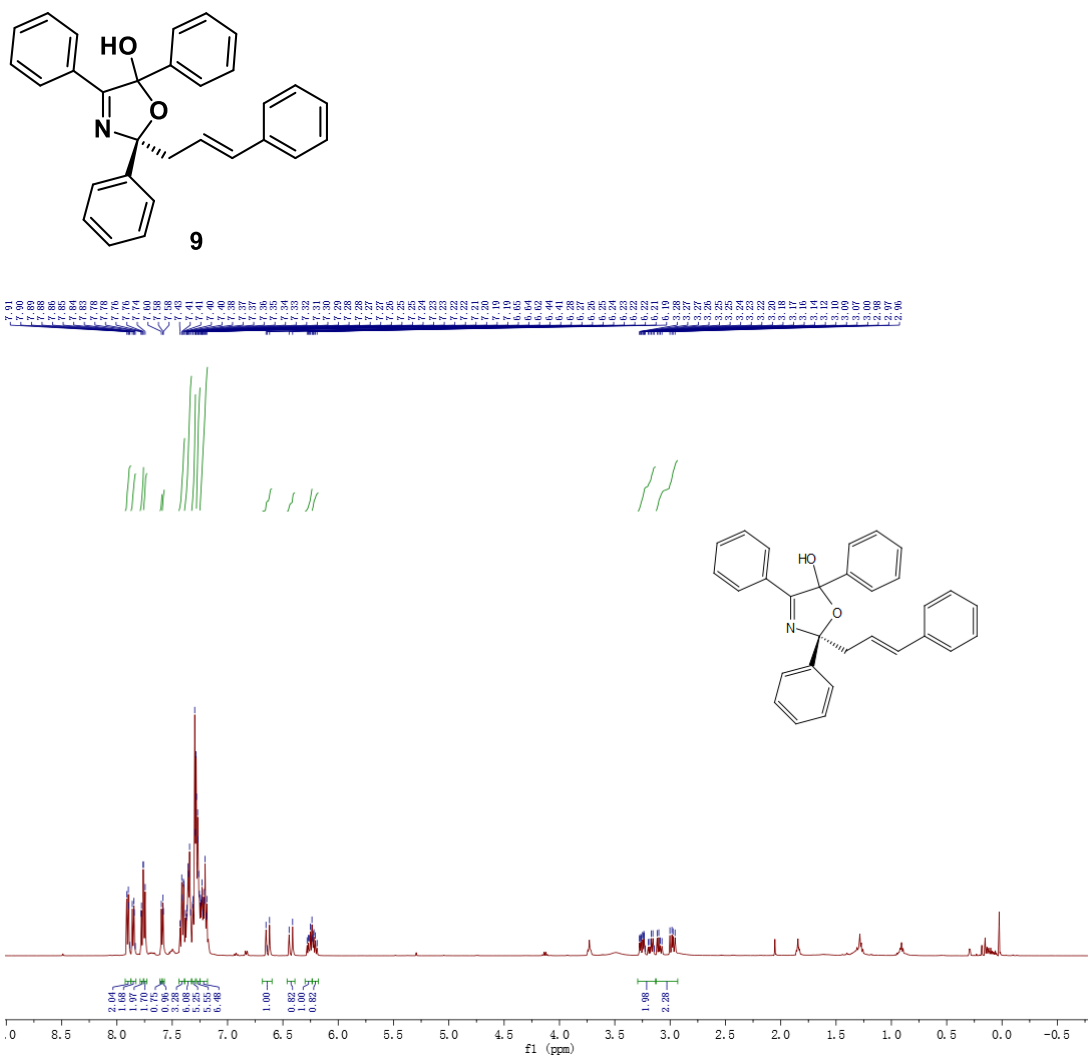

166.04  
158.55  
158.55  
153.32  
153.32  
149.99  
149.99  
138.14  
137.47  
137.47  
137.35  
137.35  
137.26  
137.26  
137.13  
137.13  
136.81  
136.81  
129.90  
129.90  
129.54  
129.54  
129.31  
129.31  
129.00  
129.00  
128.94  
128.94  
128.12  
128.12  
108.91  
108.91  
107.78  
107.78

-6.81

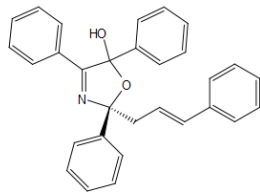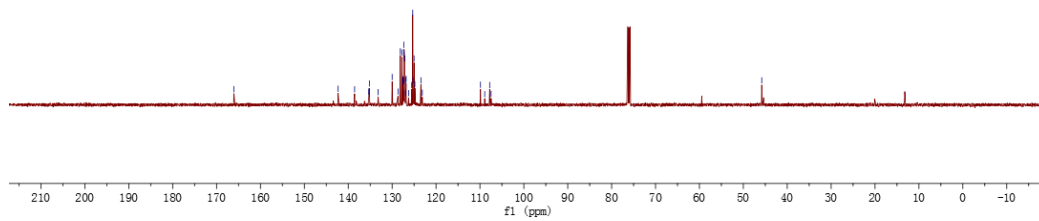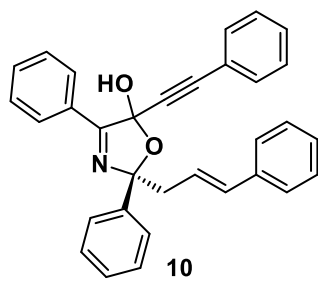

8.46  
8.35  
8.10  
8.10  
8.11  
8.11  
8.05  
8.05  
7.67  
7.67  
7.66  
7.66  
7.46  
7.46  
7.45  
7.45  
7.39  
7.39  
7.38  
7.38  
7.35  
7.35  
7.32  
7.32  
7.29  
7.29  
7.28  
7.28  
7.26  
7.26  
7.22  
7.22  
7.18  
7.18  
7.10  
7.10  
7.05  
7.05  
7.02  
7.02  
6.99  
6.99  
6.97  
6.97  
6.95  
6.95  
6.60  
6.60  
6.37  
6.37  
6.22  
6.22  
6.19  
6.19  
6.18  
6.18  
6.14  
6.14  
3.12  
3.12  
3.11  
3.11  
3.08  
3.08  
3.04  
3.04  
3.00  
3.00  
2.97  
2.97  
2.96

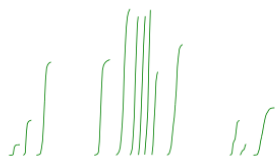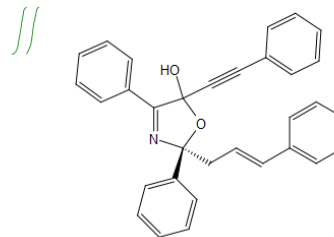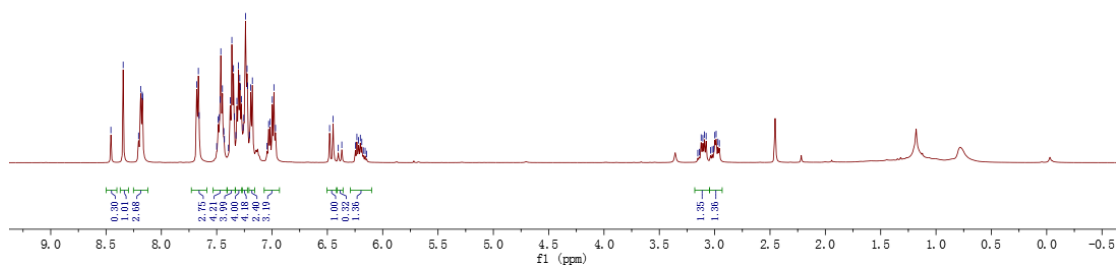

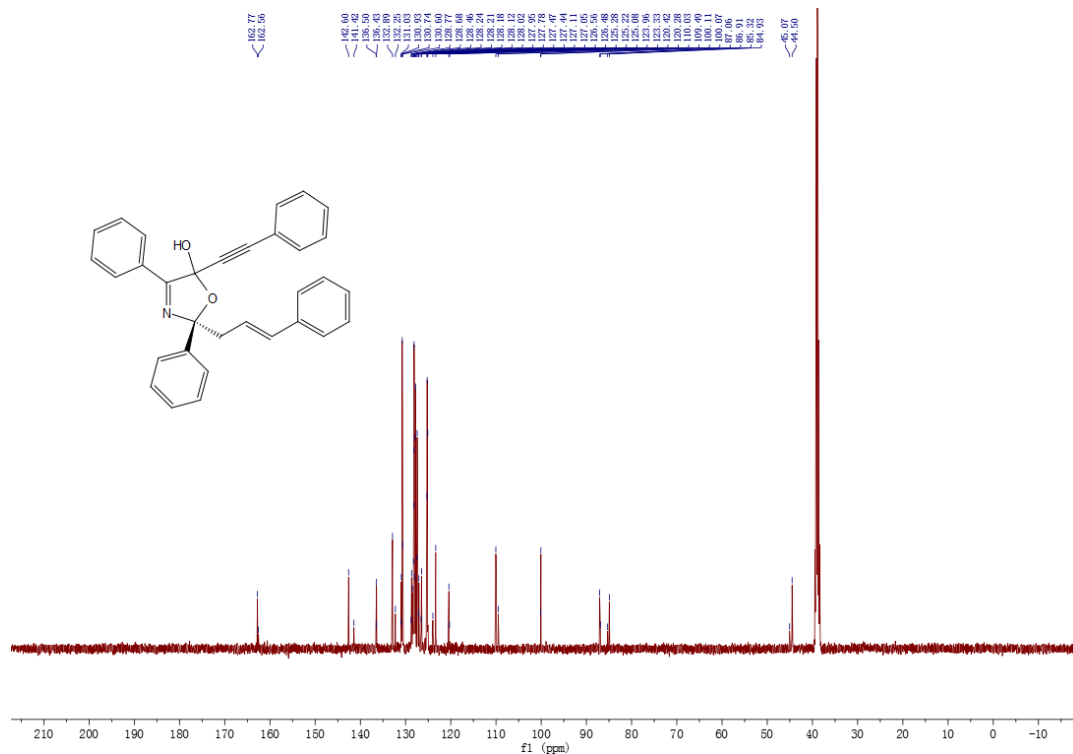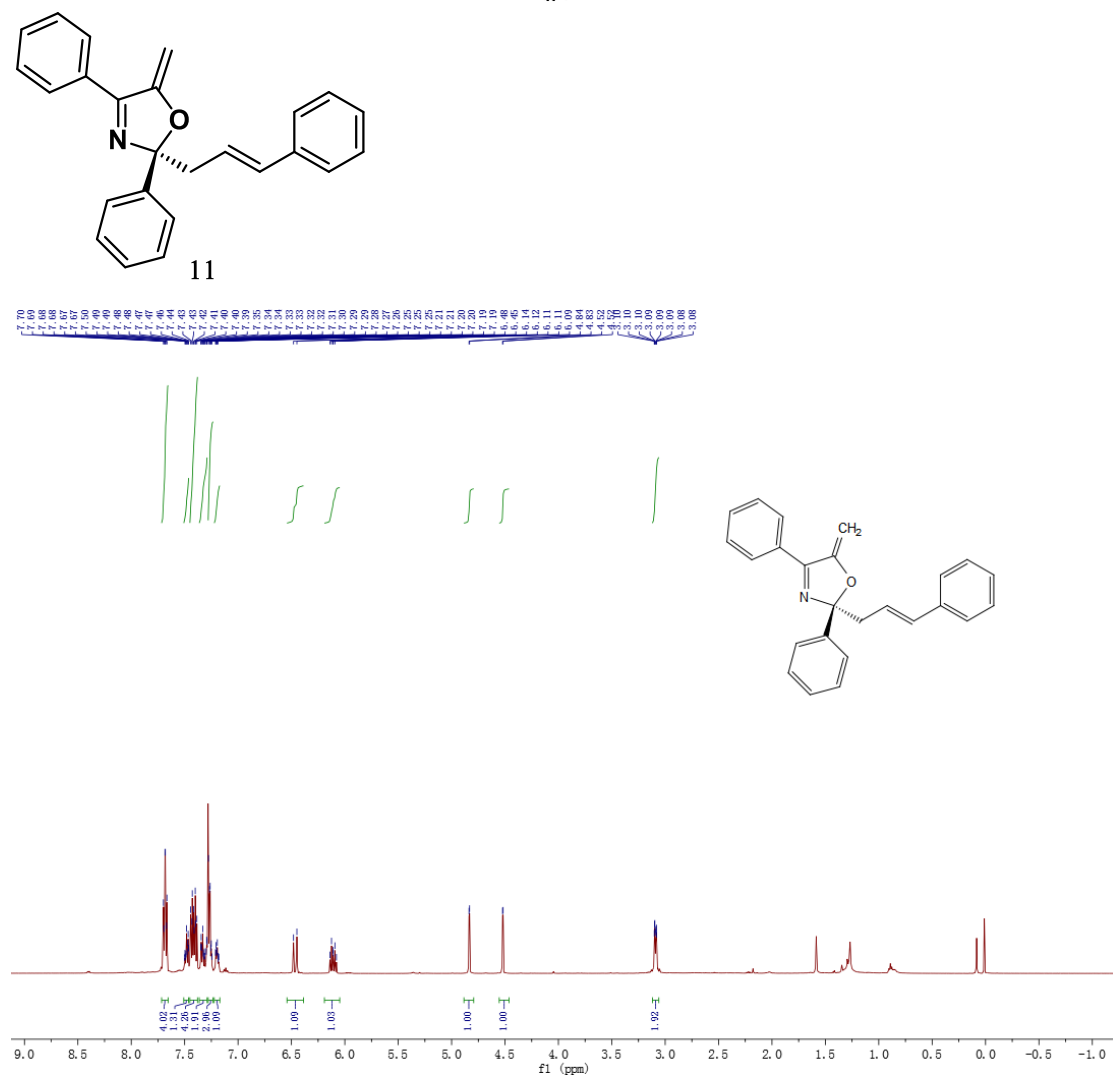

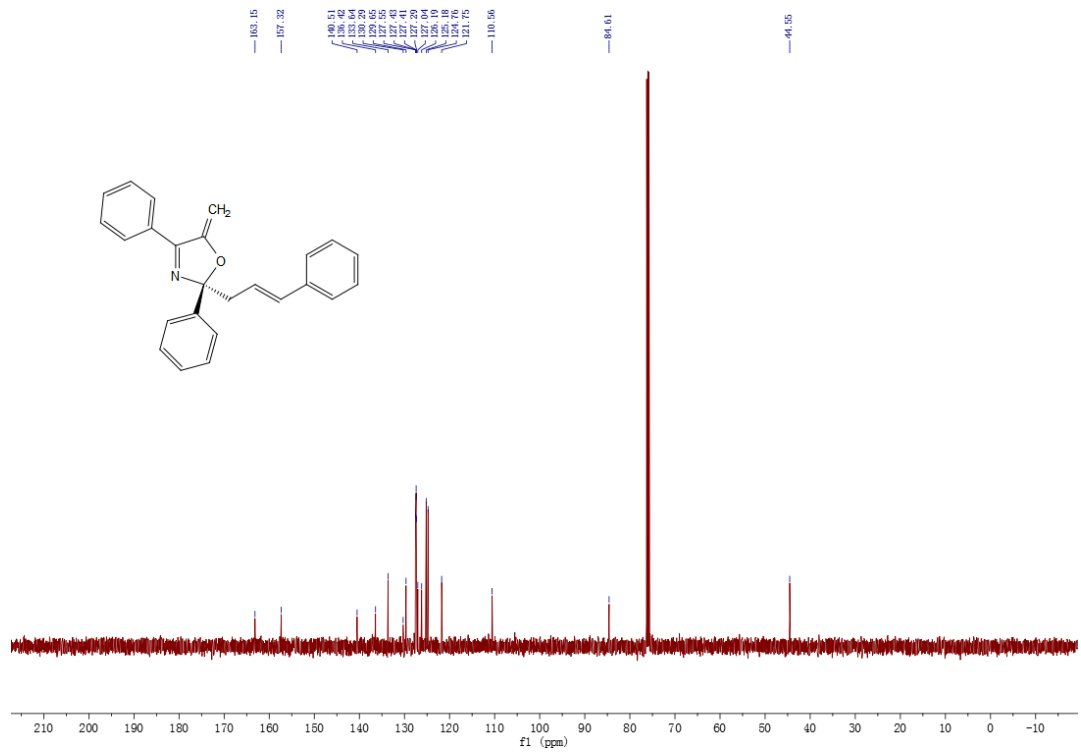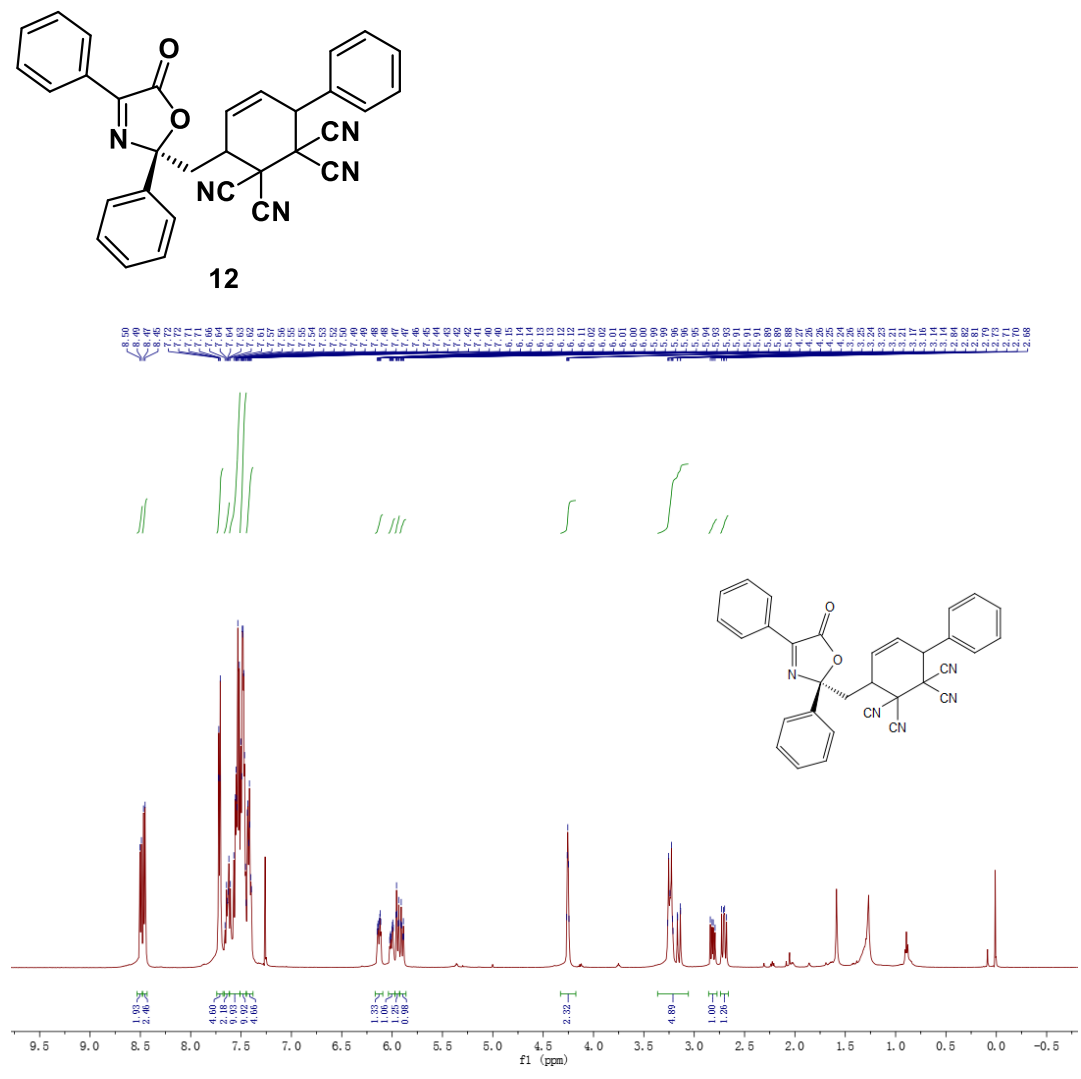

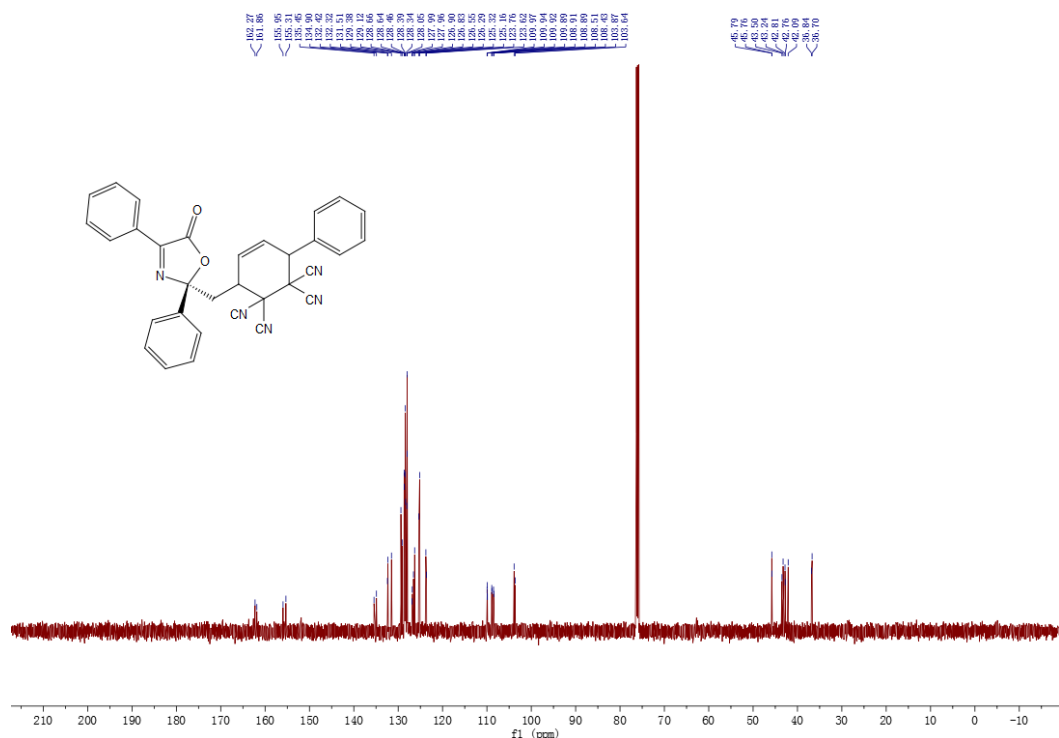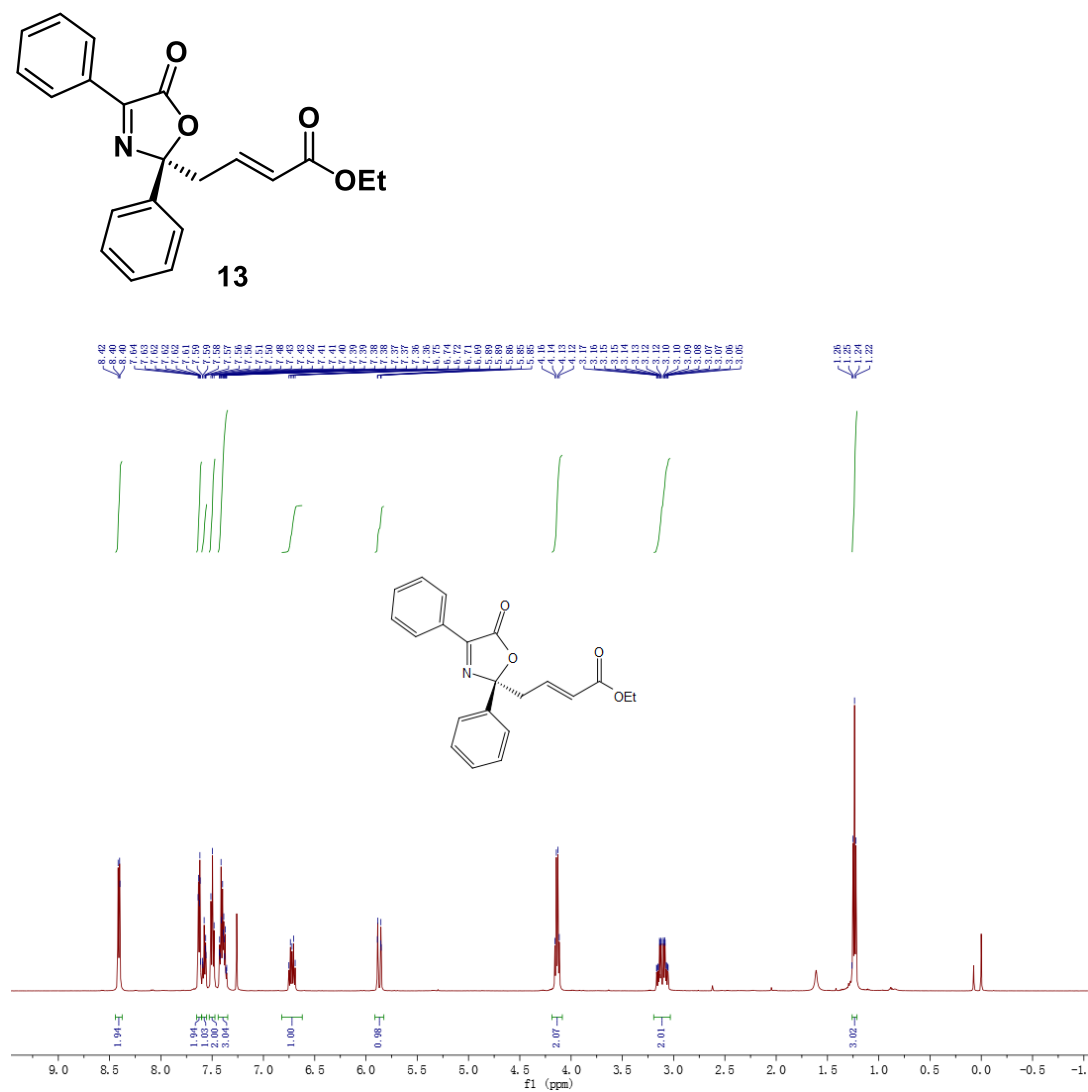



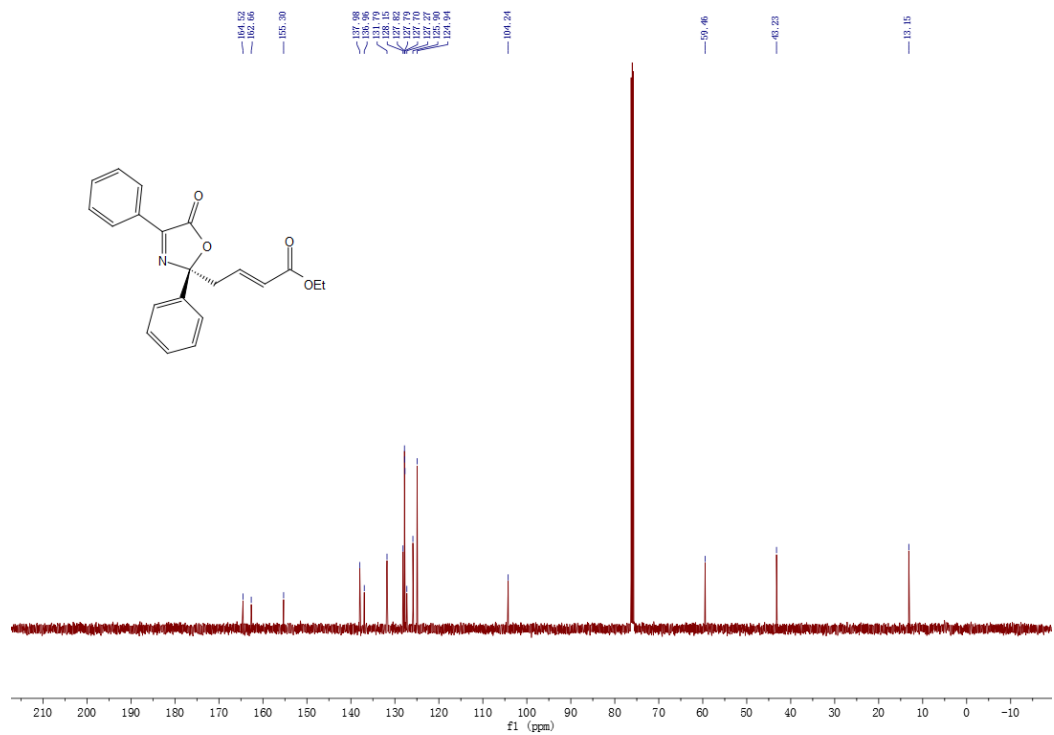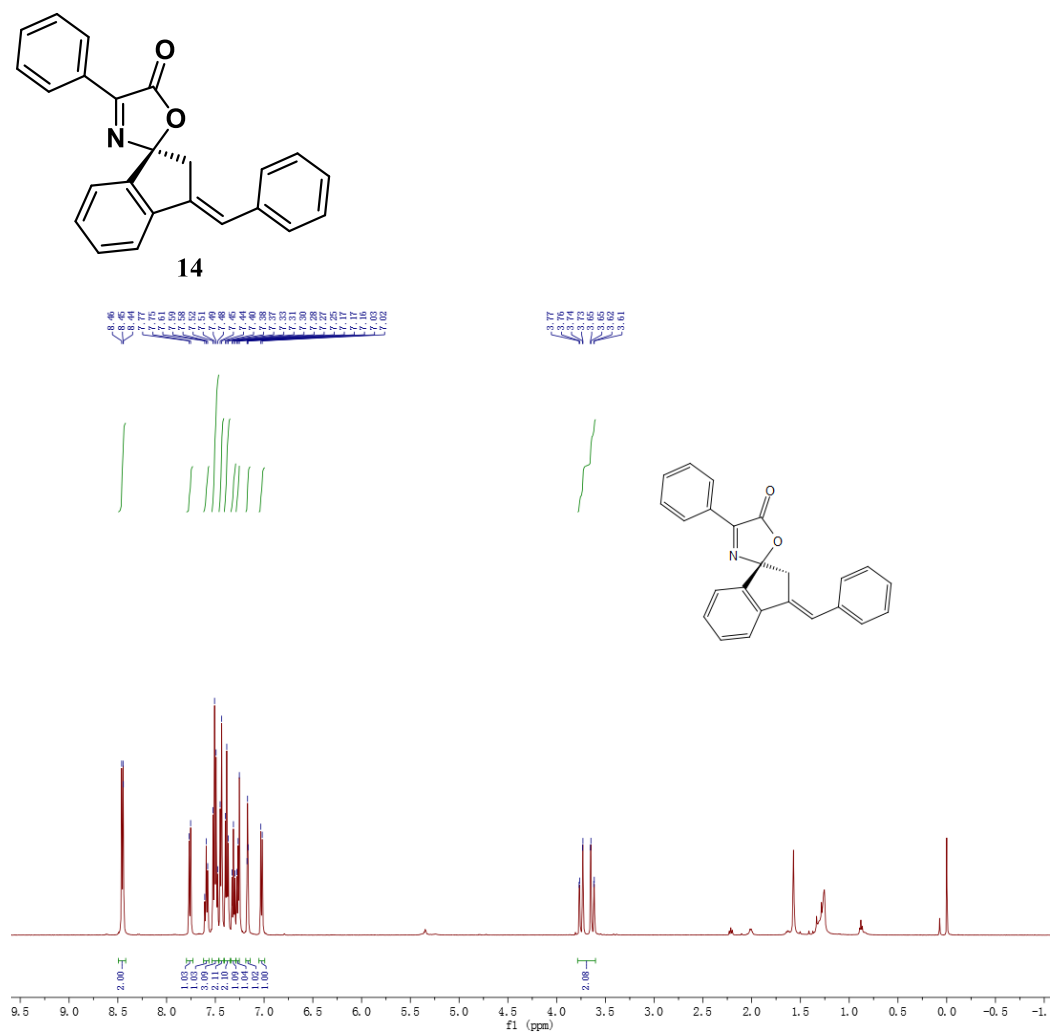

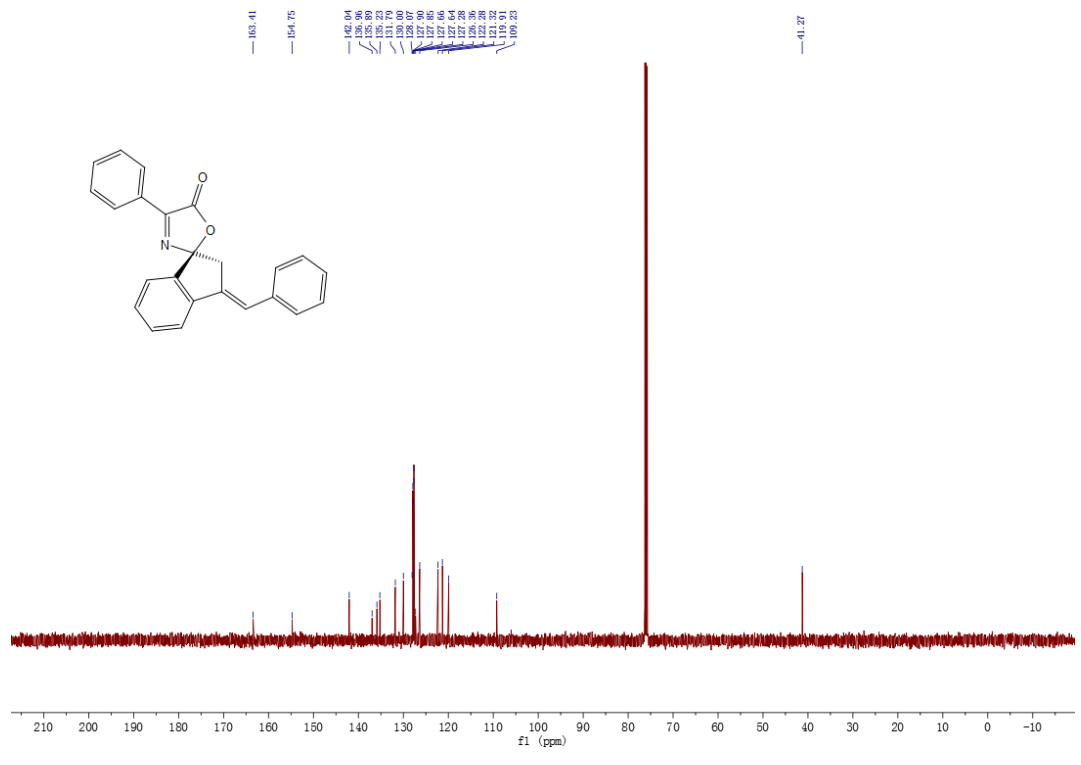

## HPLC data

For comparison of Chinese and English of the HPLC data table.

| 序号    | 峰名称       | 保留时间 (min)           | 峰面积 (mAU*min)       | 峰高 (mAU)          | 相对峰面积 (%)              | 相对峰高 (%)                 | 样品量 n.a.           |
|-------|-----------|----------------------|---------------------|-------------------|------------------------|--------------------------|--------------------|
| Entry | Peak name | Retention time (min) | Peak area (mAU*min) | Peak height (mAU) | Relative peak area (%) | Relative Peak height (%) | Sample volume n.a. |

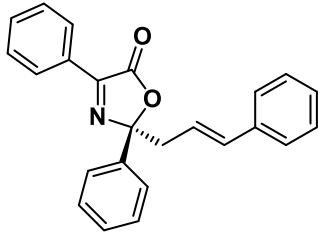

3a

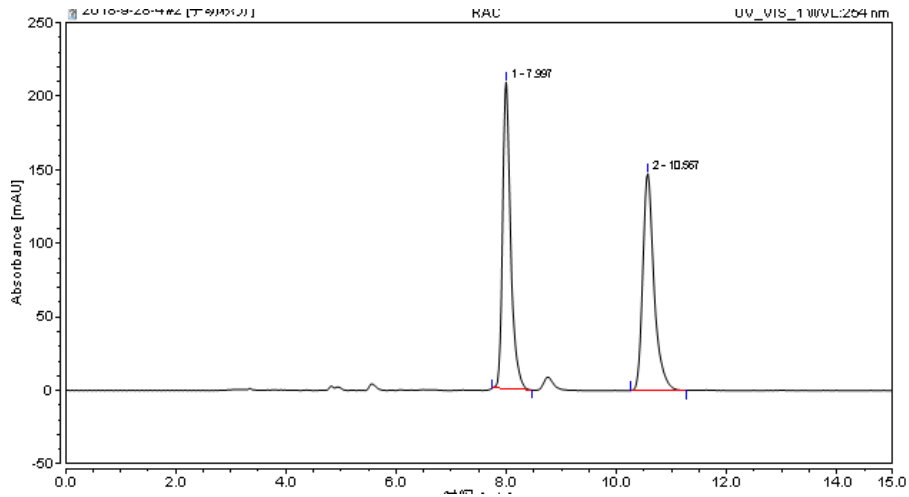

| 序号 | 峰名称 | 保留时间 min | 峰面积 mAU*min | 峰高 mAU  | 相对峰面积 % | 相对峰高 % | 样品量 n.a. |
|----|-----|----------|-------------|---------|---------|--------|----------|
| 1  |     | 7.997    | 35.224      | 208.427 | 50.12   | 58.53  | n.a.     |
| 2  |     | 10.567   | 35.057      | 147.645 | 49.88   | 41.47  | n.a.     |

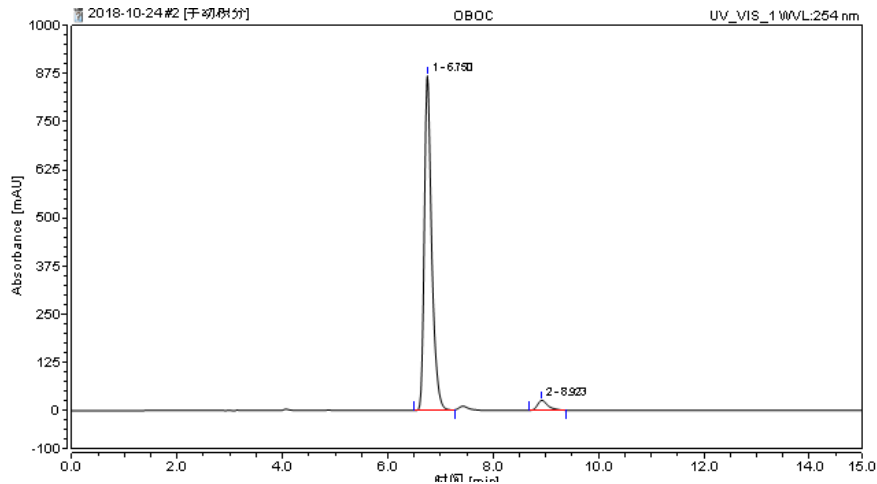

| 序号 | 峰名称 | 保留时间 min | 峰面积 mAU*min | 峰高 mAU  | 相对峰面积 % | 相对峰高 % | 样品量 n.a. |
|----|-----|----------|-------------|---------|---------|--------|----------|
| 1  |     | 6.750    | 140.535     | 868.466 | 95.87   | 97.08  | n.a.     |
| 2  |     | 8.923    | 6.053       | 26.127  | 4.13    | 2.92   | n.a.     |

For comparison of Chinese and English of the HPLC data table.

| 序号    | 峰名称       | 保留时间 (min)           | 峰面积 (mAU*min)       | 峰高 (mAU)          | 相对峰面积 (%)              | 相对峰高 (%)                 | 样品量 n.a.           |
|-------|-----------|----------------------|---------------------|-------------------|------------------------|--------------------------|--------------------|
| Entry | Peak name | Retention time (min) | Peak area (mAU*min) | Peak height (mAU) | Relative peak area (%) | Relative Peak height (%) | Sample volume n.a. |

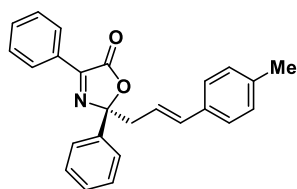

3b

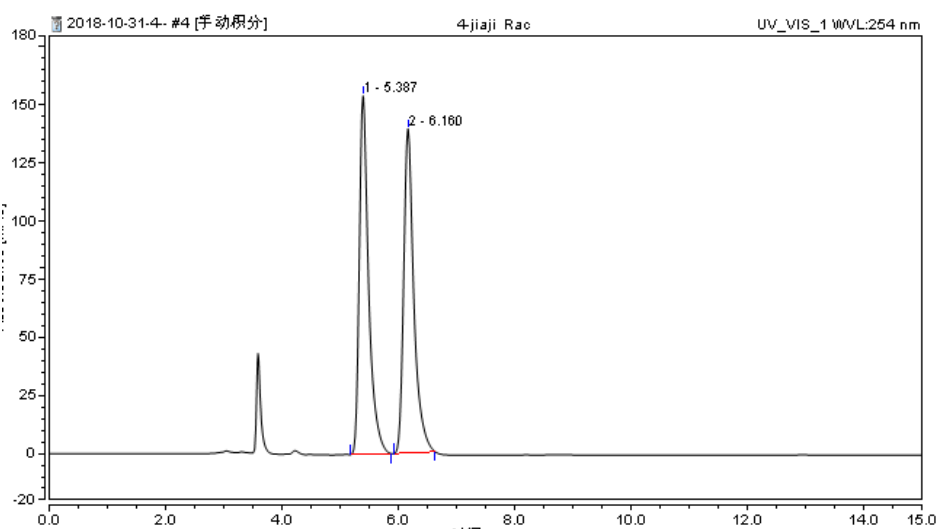

| 序号 | 峰名称 | 保留时间 min | 峰面积 mAU*min | 峰高 mAU  | 相对峰面积 % | 相对峰高 % | 样品量 n.a. |
|----|-----|----------|-------------|---------|---------|--------|----------|
| 1  |     | 5.387    | 28.724      | 154.304 | 50.39   | 52.51  | n.a.     |
| 2  |     | 6.160    | 28.285      | 139.558 | 49.61   | 47.49  | n.a.     |

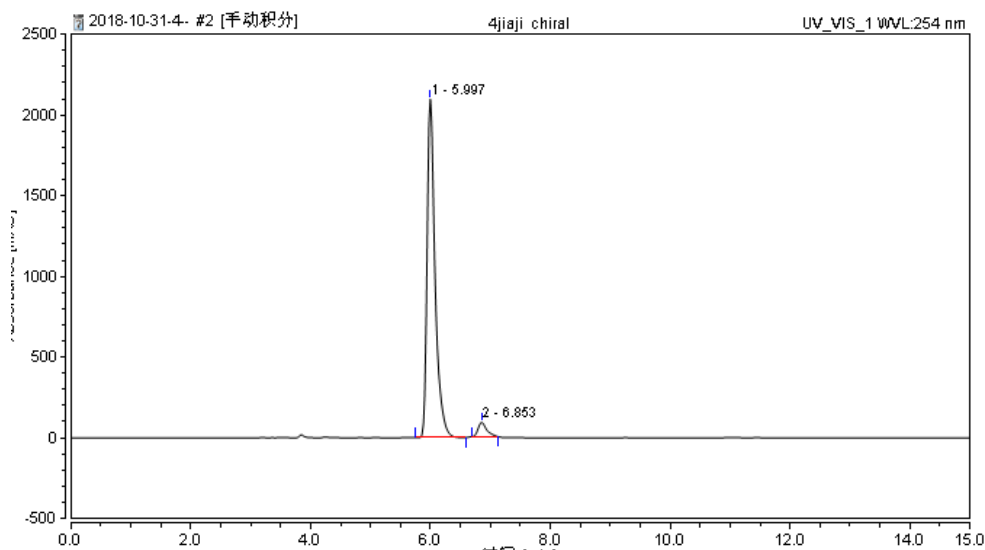

| 序号 | 峰名称 | 保留时间 min | 峰面积 mAU*min | 峰高 mAU   | 相对峰面积 % | 相对峰高 % | 样品量 n.a. |
|----|-----|----------|-------------|----------|---------|--------|----------|
| 1  |     | 5.997    | 321.445     | 2096.436 | 95.58   | 95.94  | n.a.     |
| 2  |     | 6.853    | 14.860      | 88.763   | 4.42    | 4.06   | n.a.     |

For comparison of Chinese and English of the HPLC data table.

| 序号    | 峰名称       | 保留时间 (min)           | 峰面积 (mAU*min)       | 峰高 (mAU)          | 相对峰面积 (%)              | 相对峰高 (%)                 | 样品量 n.a.           |
|-------|-----------|----------------------|---------------------|-------------------|------------------------|--------------------------|--------------------|
| Entry | Peak name | Retention time (min) | Peak area (mAU*min) | Peak height (mAU) | Relative peak area (%) | Relative Peak height (%) | Sample volume n.a. |

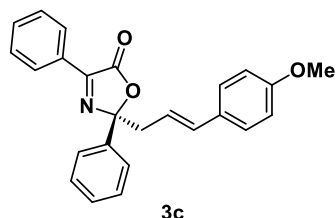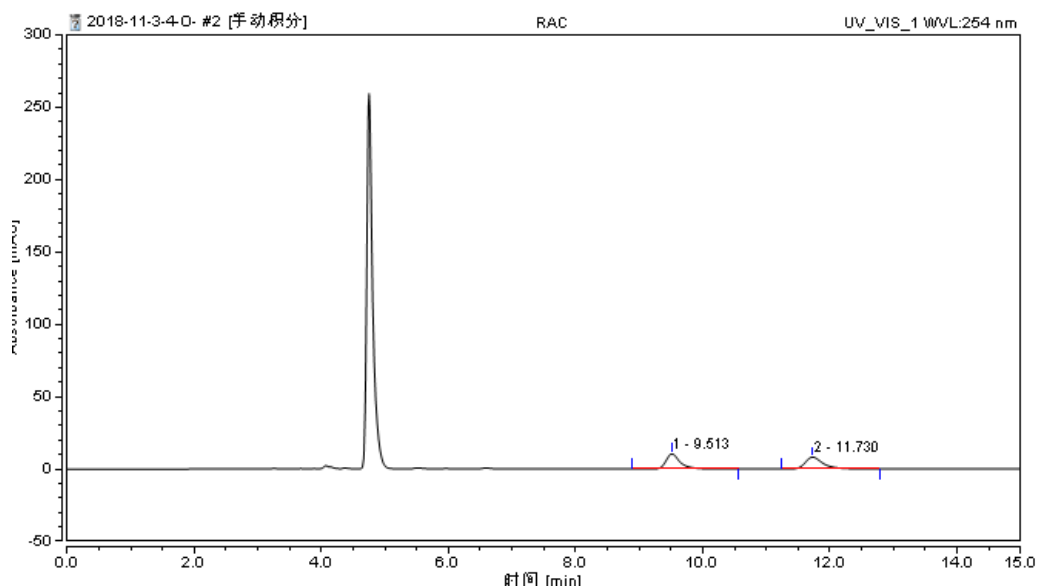

| 序号 | 峰名称 | 保留时间 min | 峰面积 mAU*min | 峰高 mAU | 相对峰面积 % | 相对峰高 % | 样品量 n.a. |
|----|-----|----------|-------------|--------|---------|--------|----------|
| 1  |     | 9.513    | 2.655       | 10.397 | 50.15   | 55.89  | n.a.     |
| 2  |     | 11.730   | 2.639       | 8.204  | 49.85   | 44.11  | n.a.     |

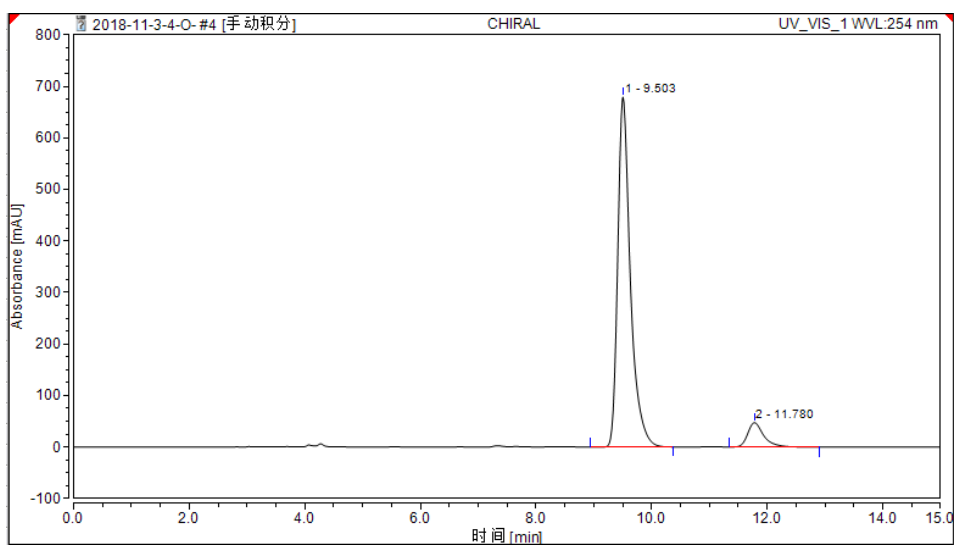

| 序号 | 峰名称 | 保留时间 min | 峰面积 mAU*min | 峰高 mAU  | 相对峰面积 % | 相对峰高 % | 样品量 n.a. |
|----|-----|----------|-------------|---------|---------|--------|----------|
| 1  |     | 9.503    | 171.907     | 679.085 | 91.93   | 93.49  | n.a.     |
| 2  |     | 11.780   | 15.082      | 47.322  | 8.07    | 6.51   | n.a.     |

For comparison of Chinese and English of the HPLC data table.

| 序号    | 峰名称       | 保留时间 (min)           | 峰面积 (mAU*min)       | 峰高 (mAU)          | 相对峰面积 (%)              | 相对峰高 (%)                 | 样品量 n.a.           |
|-------|-----------|----------------------|---------------------|-------------------|------------------------|--------------------------|--------------------|
| Entry | Peak name | Retention time (min) | Peak area (mAU*min) | Peak height (mAU) | Relative peak area (%) | Relative Peak height (%) | Sample volume n.a. |

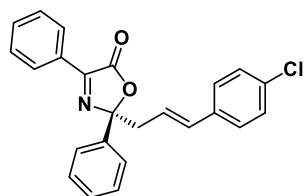

3d

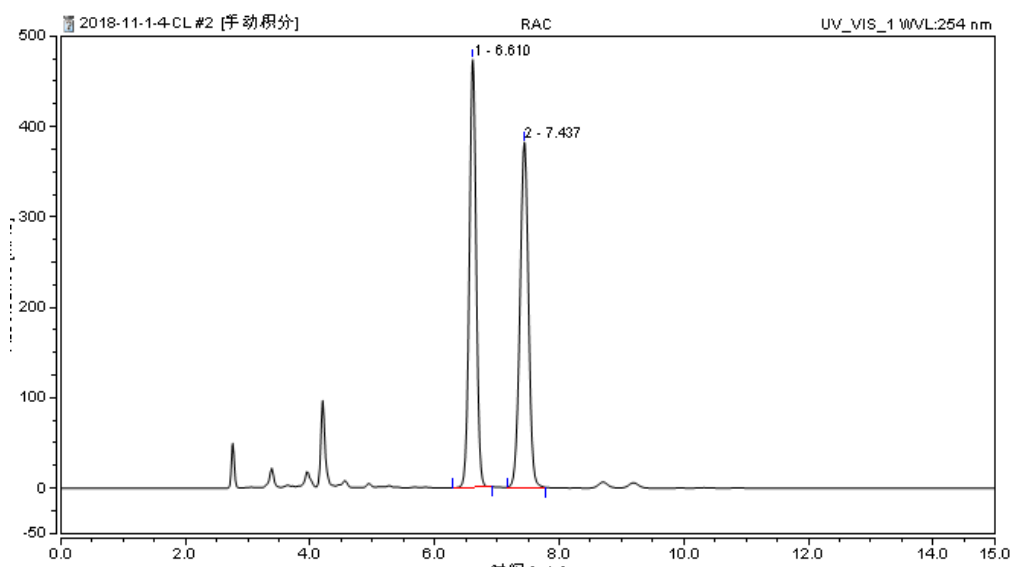

| 序号 | 峰名称 | 保留时间 min | 峰面积 mAU*min | 峰高 mAU  | 相对峰面积 % | 相对峰高 % | 样品量 n.a. |
|----|-----|----------|-------------|---------|---------|--------|----------|
| 1  |     | 6.610    | 60.342      | 473.152 | 49.99   | 55.33  | n.a.     |
| 2  |     | 7.437    | 60.371      | 381.963 | 50.01   | 44.67  | n.a.     |

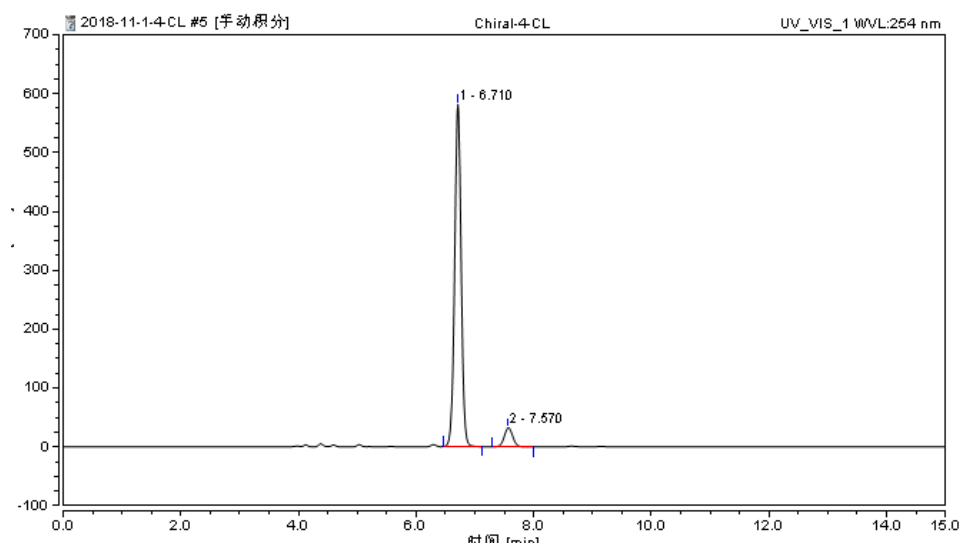

| 序号 | 峰名称 | 保留时间 min | 峰面积 mAU*min | 峰高 mAU  | 相对峰面积 % | 相对峰高 % | 样品量 n.a. |
|----|-----|----------|-------------|---------|---------|--------|----------|
| 1  |     | 6.710    | 74.384      | 581.569 | 93.19   | 94.67  | n.a.     |
| 2  |     | 7.570    | 5.435       | 32.737  | 6.81    | 5.33   | n.a.     |

For comparison of Chinese and English of the HPLC data table.

| 序号    | 峰名称       | 保留时间 (min)           | 峰面积 (mAU*min)       | 峰高 (mAU)          | 相对峰面积 (%)              | 相对峰高 (%)                 | 样品量 n.a.           |
|-------|-----------|----------------------|---------------------|-------------------|------------------------|--------------------------|--------------------|
| Entry | Peak name | Retention time (min) | Peak area (mAU*min) | Peak height (mAU) | Relative peak area (%) | Relative Peak height (%) | Sample volume n.a. |

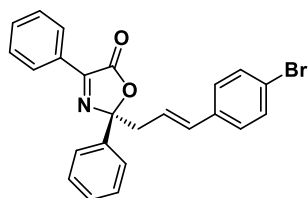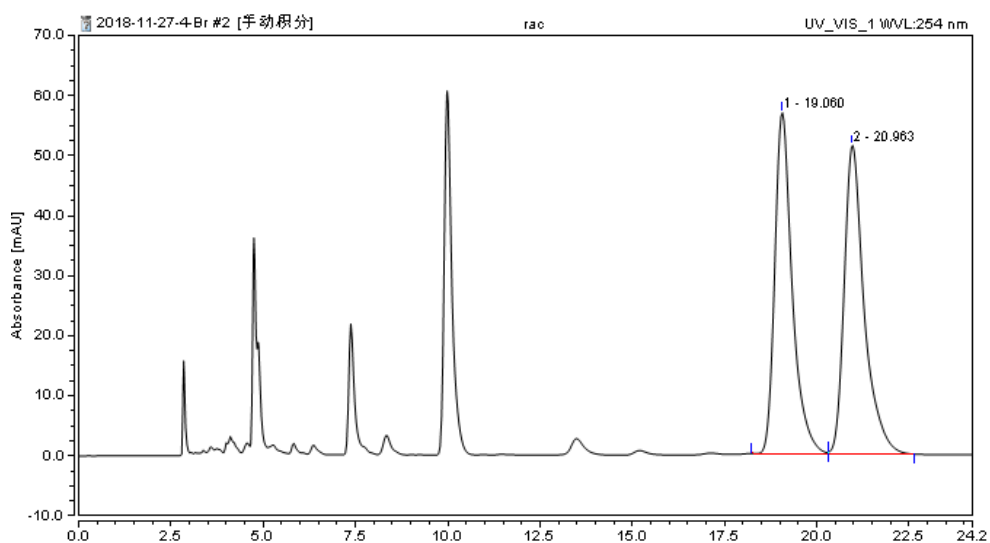

| 序号 | 峰名称 | 保留时间 min | 峰面积 mAU*min | 峰高 mAU | 相对峰面积 % | 相对峰高 % | 样品量 n.a. |
|----|-----|----------|-------------|--------|---------|--------|----------|
| 1  |     | 19.060   | 31.042      | 56.809 | 49.10   | 52.49  | n.a.     |
| 2  |     | 20.963   | 32.180      | 51.428 | 50.90   | 47.51  | n.a.     |

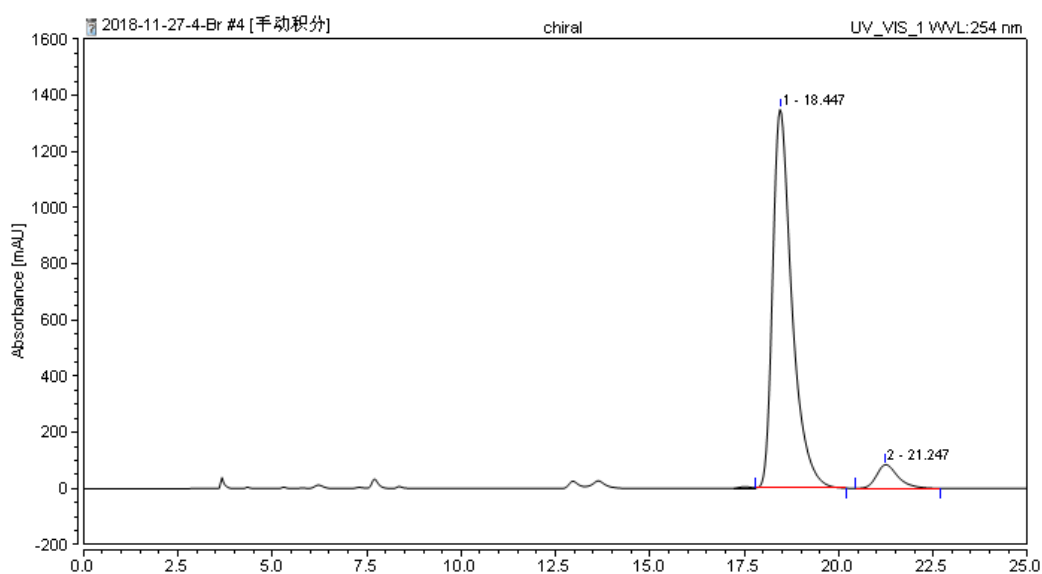

| 序号 | 峰名称 | 保留时间 min | 峰面积 mAU*min | 峰高 mAU   | 相对峰面积 % | 相对峰高 % | 样品量 n.a. |
|----|-----|----------|-------------|----------|---------|--------|----------|
| 1  |     | 18.447   | 797.856     | 1349.756 | 93.45   | 94.11  | n.a.     |
| 2  |     | 21.247   | 55.899      | 84.509   | 6.55    | 5.89   | n.a.     |

For comparison of Chinese and English of the HPLC data table.

| 序号    | 峰名称       | 保留时间 (min)           | 峰面积 (mAU*min)       | 峰高 (mAU)          | 相对峰面积 (%)              | 相对峰高 (%)                 | 样品量 n.a.           |
|-------|-----------|----------------------|---------------------|-------------------|------------------------|--------------------------|--------------------|
| Entry | Peak name | Retention time (min) | Peak area (mAU*min) | Peak height (mAU) | Relative peak area (%) | Relative Peak height (%) | Sample volume n.a. |

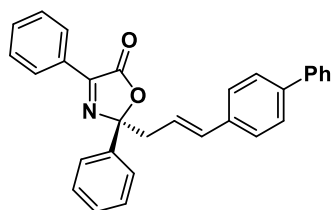

3f

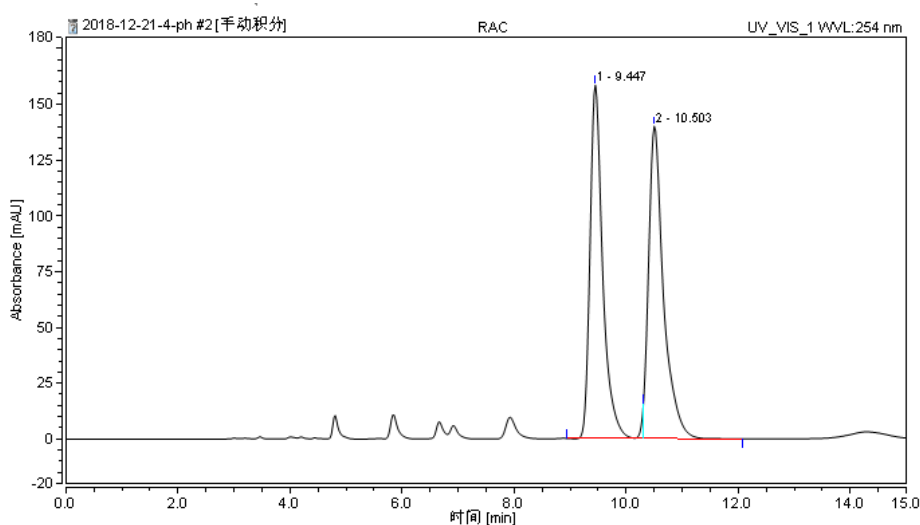

| 序号 | 峰名称 | 保留时间 min | 峰面积 mAU*min | 峰高 mAU  | 相对峰面积 % | 相对峰高 % | 样品量 n.a. |
|----|-----|----------|-------------|---------|---------|--------|----------|
| 1  |     | 9.447    | 42.118      | 158.458 | 49.55   | 53.04  | n.a.     |
| 2  |     | 10.503   | 42.885      | 140.277 | 50.45   | 46.96  | n.a.     |

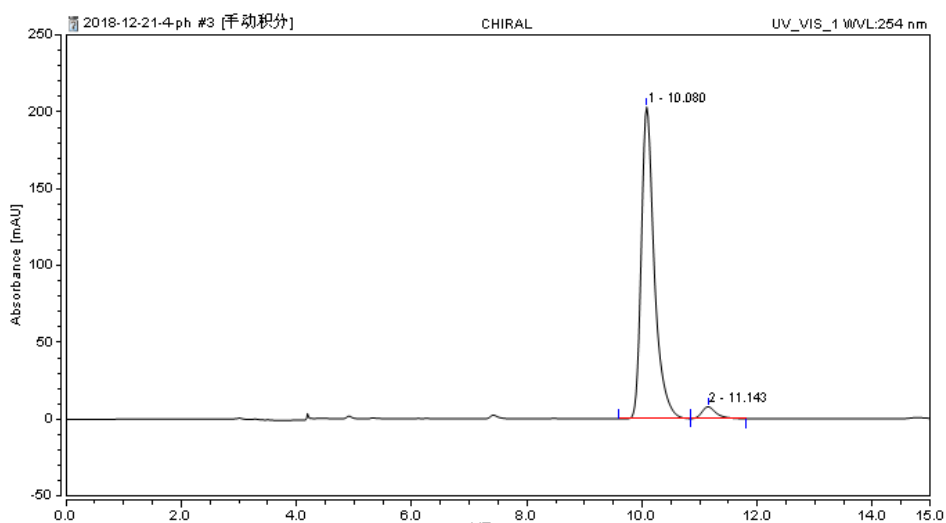

| 序号 | 峰名称 | 保留时间 min | 峰面积 mAU*min | 峰高 mAU  | 相对峰面积 % | 相对峰高 % | 样品量 n.a. |
|----|-----|----------|-------------|---------|---------|--------|----------|
| 1  |     | 10.080   | 53.038      | 202.931 | 95.98   | 96.32  | n.a.     |
| 2  |     | 11.143   | 2.224       | 7.755   | 4.02    | 3.68   | n.a.     |



For comparison of Chinese and English of the HPLC data table.

| 序号    | 峰名称       | 保留时间 (min)           | 峰面积 (mAU*min)       | 峰高 (mAU)          | 相对峰面积 (%)              | 相对峰高 (%)                 | 样品量 n.a.           |
|-------|-----------|----------------------|---------------------|-------------------|------------------------|--------------------------|--------------------|
| Entry | Peak name | Retention time (min) | Peak area (mAU*min) | Peak height (mAU) | Relative peak area (%) | Relative Peak height (%) | Sample volume n.a. |

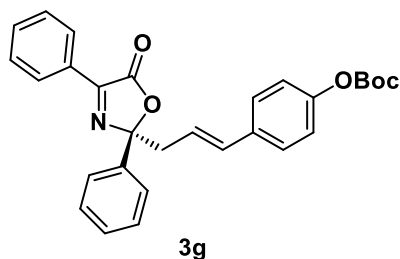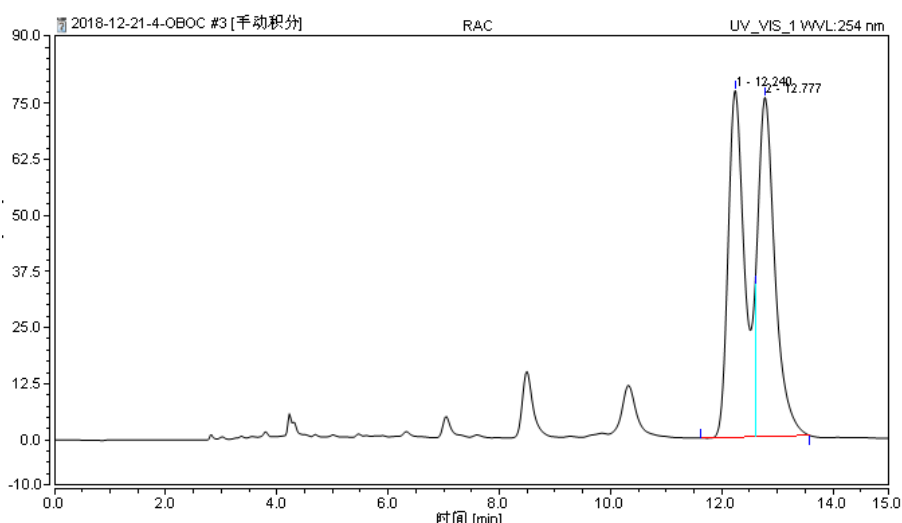

| 序号 | 峰名称 | 保留时间 min | 峰面积 mAU*min | 峰高 mAU | 相对峰面积 % | 相对峰高 % | 样品量 n.a. |
|----|-----|----------|-------------|--------|---------|--------|----------|
| 1  |     | 12.240   | 26.192      | 77.267 | 49.31   | 50.55  | n.a.     |
| 2  |     | 12.777   | 26.924      | 75.573 | 50.69   | 49.45  | n.a.     |

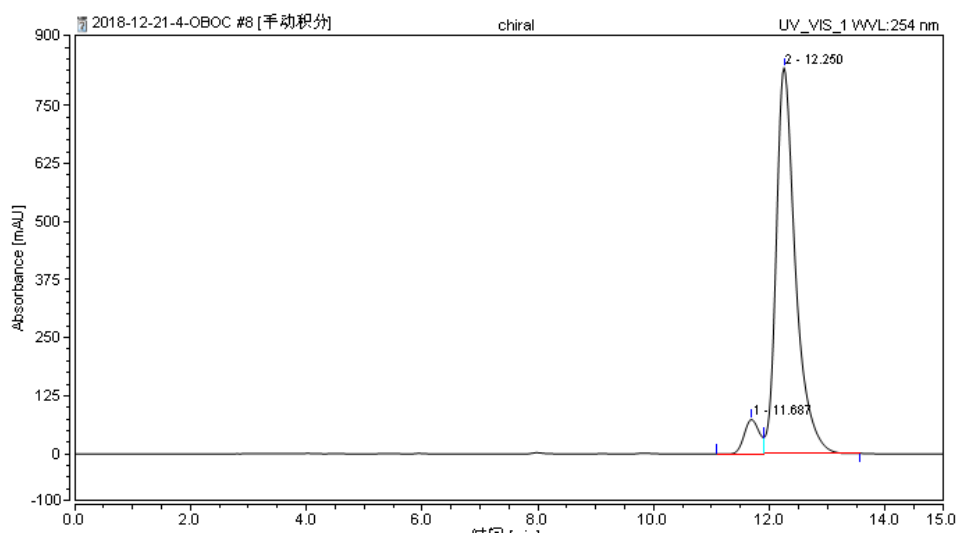

| 序号 | 峰名称 | 保留时间 min | 峰面积 mAU*min | 峰高 mAU  | 相对峰面积 % | 相对峰高 % | 样品量 n.a. |
|----|-----|----------|-------------|---------|---------|--------|----------|
| 1  |     | 11.687   | 22.473      | 73.878  | 6.56    | 8.16   | n.a.     |
| 2  |     | 12.250   | 319.872     | 831.155 | 93.44   | 91.84  | n.a.     |

For comparison of Chinese and English of the HPLC data table.

| 序号    | 峰名称       | 保留时间 (min)           | 峰面积 (mAU*min)       | 峰高 (mAU)          | 相对峰面积 (%)              | 相对峰高 (%)                 | 样品量 n.a.           |
|-------|-----------|----------------------|---------------------|-------------------|------------------------|--------------------------|--------------------|
| Entry | Peak name | Retention time (min) | Peak area (mAU*min) | Peak height (mAU) | Relative peak area (%) | Relative Peak height (%) | Sample volume n.a. |

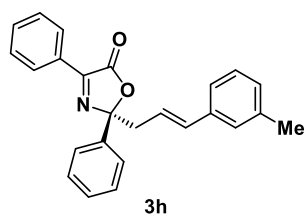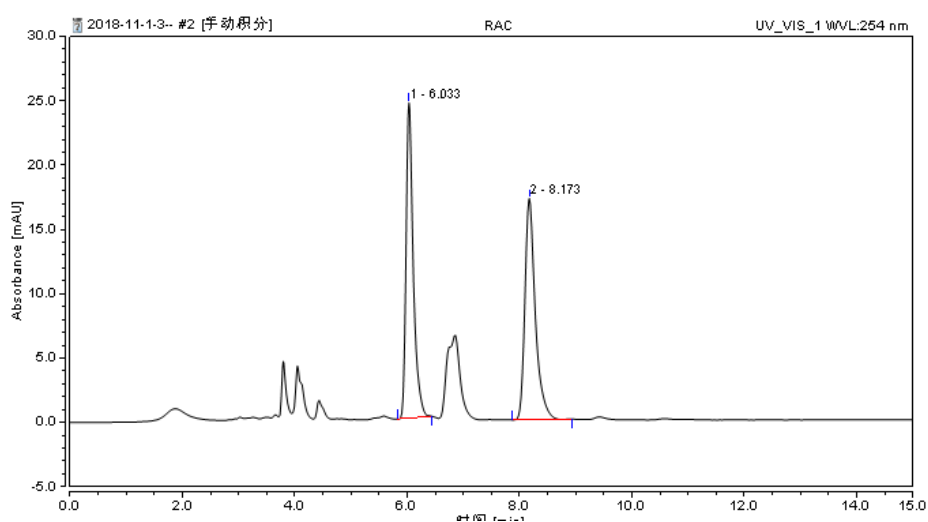

| 序号 | 峰名称 | 保留时间 min | 峰面积 mAU*min | 峰高 mAU | 相对峰面积 % | 相对峰高 % | 样品量 n.a. |
|----|-----|----------|-------------|--------|---------|--------|----------|
| 1  |     | 6.033    | 3.626       | 24.517 | 49.68   | 58.77  | n.a.     |
| 2  |     | 8.173    | 3.673       | 17.200 | 50.32   | 41.23  | n.a.     |

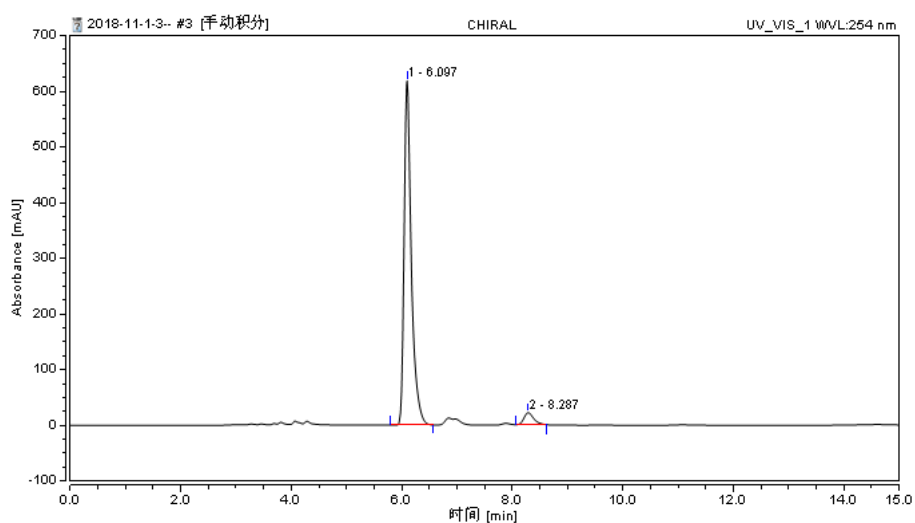

| 序号 | 峰名称 | 保留时间 min | 峰面积 mAU*min | 峰高 mAU  | 相对峰面积 % | 相对峰高 % | 样品量 n.a. |
|----|-----|----------|-------------|---------|---------|--------|----------|
| 1  |     | 6.097    | 93.581      | 618.525 | 95.50   | 96.60  | n.a.     |
| 2  |     | 8.287    | 4.406       | 21.773  | 4.50    | 3.40   | n.a.     |

For comparison of Chinese and English of the HPLC data table.

| 序号    | 峰名称       | 保留时间 (min)           | 峰面积 (mAU*min)       | 峰高 (mAU)          | 相对峰面积 (%)              | 相对峰高 (%)                 | 样品量 n.a.           |
|-------|-----------|----------------------|---------------------|-------------------|------------------------|--------------------------|--------------------|
| Entry | Peak name | Retention time (min) | Peak area (mAU*min) | Peak height (mAU) | Relative peak area (%) | Relative Peak height (%) | Sample volume n.a. |

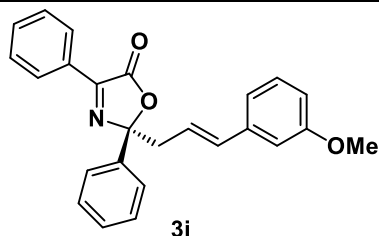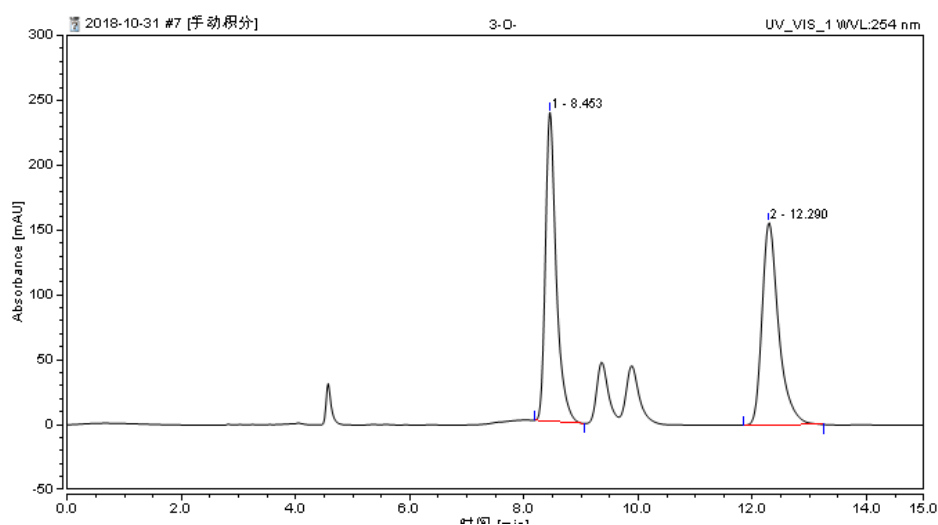

| 序号 | 峰名称 | 保留时间 min | 峰面积 mAU*min | 峰高 mAU  | 相对峰面积 % | 相对峰高 % | 样品量 n.a. |
|----|-----|----------|-------------|---------|---------|--------|----------|
| 1  |     | 8.453    | 52.315      | 238.139 | 49.91   | 60.41  | n.a.     |
| 2  |     | 12.290   | 52.513      | 156.048 | 50.09   | 39.59  | n.a.     |

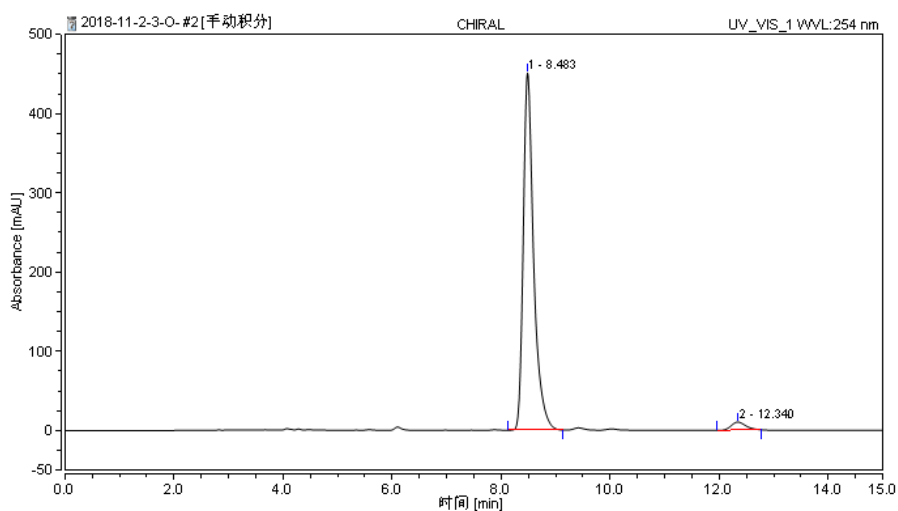

| 序号 | 峰名称 | 保留时间 min | 峰面积 mAU*min | 峰高 mAU  | 相对峰面积 % | 相对峰高 % | 样品量 n.a. |
|----|-----|----------|-------------|---------|---------|--------|----------|
| 1  |     | 8.483    | 99.521      | 450.987 | 96.93   | 97.78  | n.a.     |
| 2  |     | 12.340   | 3.150       | 10.257  | 3.07    | 2.22   | n.a.     |

For comparison of Chinese and English of the HPLC data table.

| 序号    | 峰名称       | 保留时间 (min)           | 峰面积 (mAU*min)       | 峰高 (mAU)          | 相对峰面积 (%)              | 相对峰高 (%)                 | 样品量 n.a.           |
|-------|-----------|----------------------|---------------------|-------------------|------------------------|--------------------------|--------------------|
| Entry | Peak name | Retention time (min) | Peak area (mAU*min) | Peak height (mAU) | Relative peak area (%) | Relative Peak height (%) | Sample volume n.a. |

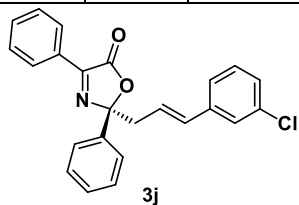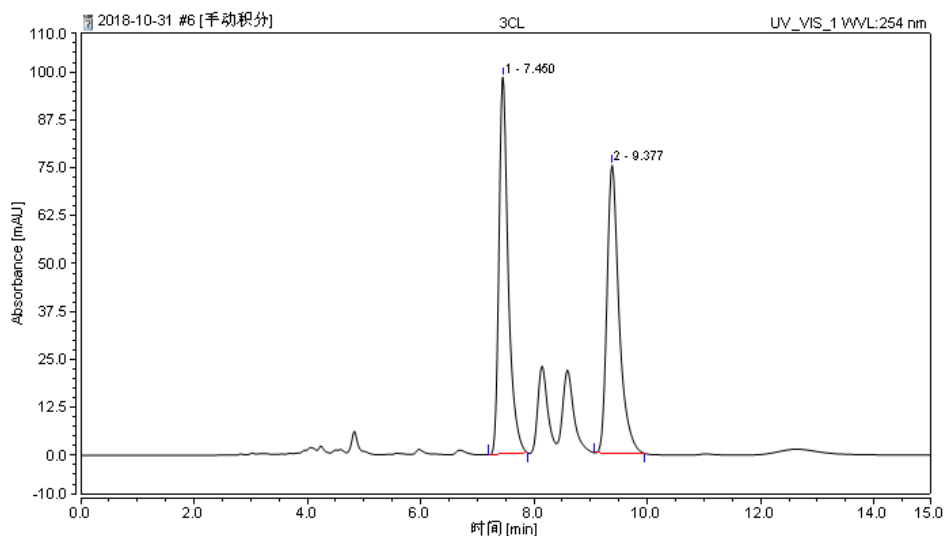

| 序号 | 峰名称 | 保留时间 min | 峰面积 mAU*min | 峰高 mAU | 相对峰面积 % | 相对峰高 % | 样品量 n.a. |
|----|-----|----------|-------------|--------|---------|--------|----------|
| 1  |     | 7.450    | 18.630      | 98.352 | 50.10   | 56.68  | n.a.     |
| 2  |     | 9.377    | 18.552      | 75.166 | 49.90   | 43.32  | n.a.     |

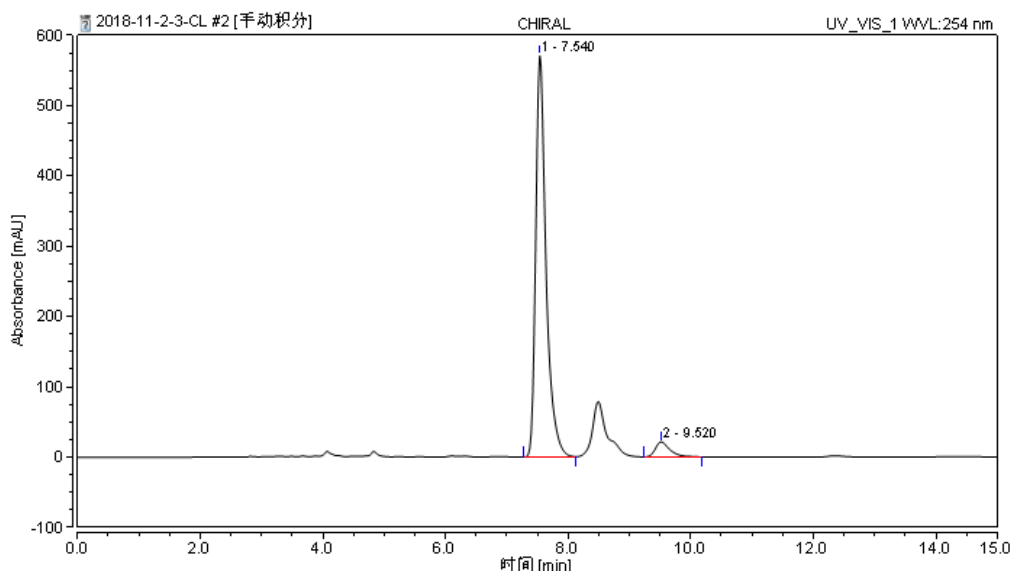

| 序号 | 峰名称 | 保留时间 min | 峰面积 mAU*min | 峰高 mAU  | 相对峰面积 % | 相对峰高 % | 样品量 n.a. |
|----|-----|----------|-------------|---------|---------|--------|----------|
| 1  |     | 7.540    | 110.765     | 570.503 | 94.97   | 96.37  | n.a.     |
| 2  |     | 9.520    | 5.863       | 21.488  | 5.03    | 3.63   | n.a.     |

For comparison of Chinese and English of the HPLC data table.

| 序号    | 峰名称       | 保留时间 (min)           | 峰面积 (mAU*min)       | 峰高 (mAU)          | 相对峰面积 (%)              | 相对峰高 (%)                 | 样品量           |
|-------|-----------|----------------------|---------------------|-------------------|------------------------|--------------------------|---------------|
| Entry | Peak name | Retention time (min) | Peak area (mAU*min) | Peak height (mAU) | Relative peak area (%) | Relative Peak height (%) | Sample volume |

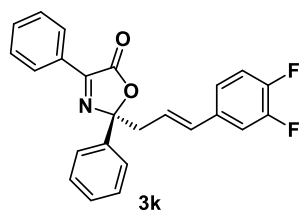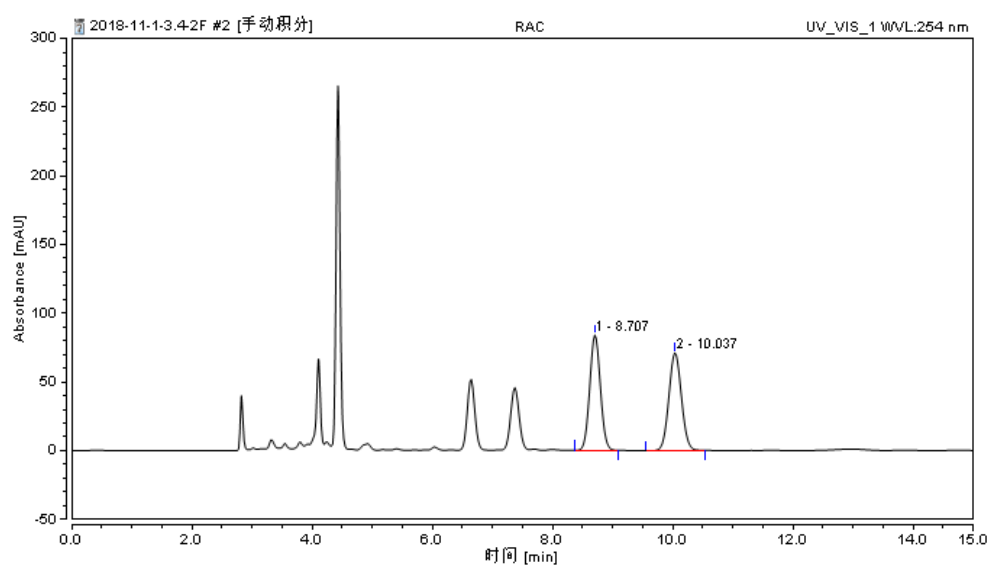

| 序号 | 峰名称 | 保留时间 min | 峰面积 mAU*min | 峰高 mAU | 相对峰面积 % | 相对峰高 % | 样品量  |
|----|-----|----------|-------------|--------|---------|--------|------|
| 1  |     | 8.707    | 17.199      | 84.028 | 50.09   | 54.14  | n.a. |
| 2  |     | 10.037   | 17.138      | 71.171 | 49.91   | 45.86  | n.a. |

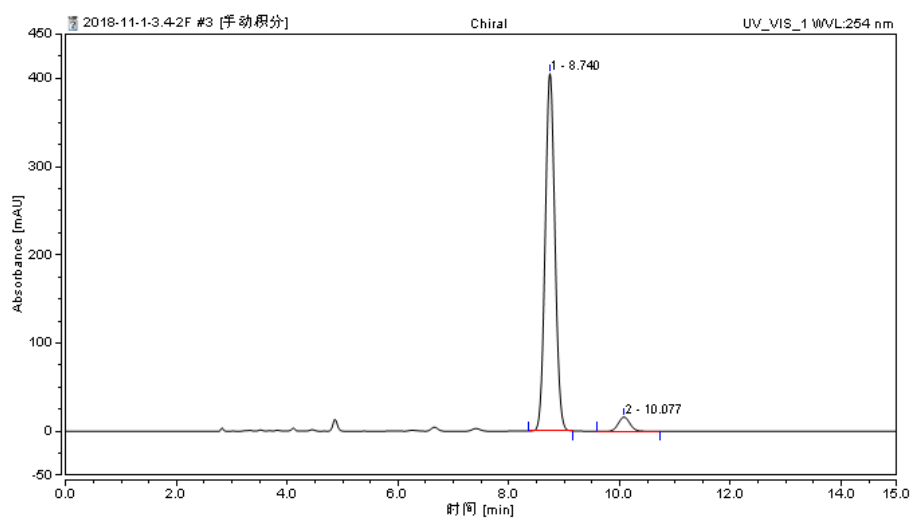

| 序号 | 峰名称 | 保留时间 min | 峰面积 mAU*min | 峰高 mAU  | 相对峰面积 % | 相对峰高 % | 样品量  |
|----|-----|----------|-------------|---------|---------|--------|------|
| 1  |     | 8.740    | 82.236      | 405.026 | 95.42   | 96.15  | n.a. |
| 2  |     | 10.077   | 3.943       | 16.199  | 4.58    | 3.85   | n.a. |

For comparison of Chinese and English of the HPLC data table.

| 序号    | 峰名<br>称      | 保留时间<br>(min)           | 峰面<br>积<br>(mAU*min)   | 峰高<br>(mAU)             | 相对峰面<br>积 (%)                | 相对峰高<br>(%)                    | 样品量<br>n.a.              |
|-------|--------------|-------------------------|------------------------|-------------------------|------------------------------|--------------------------------|--------------------------|
| Entry | Peak<br>name | Retention<br>time (min) | Peak area<br>(mAU*min) | Peak<br>height<br>(mAU) | Relative<br>peak area<br>(%) | Relative<br>Peak height<br>(%) | Sample<br>volume<br>n.a. |

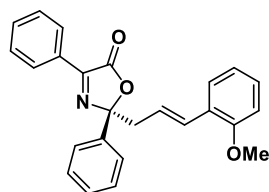

3I

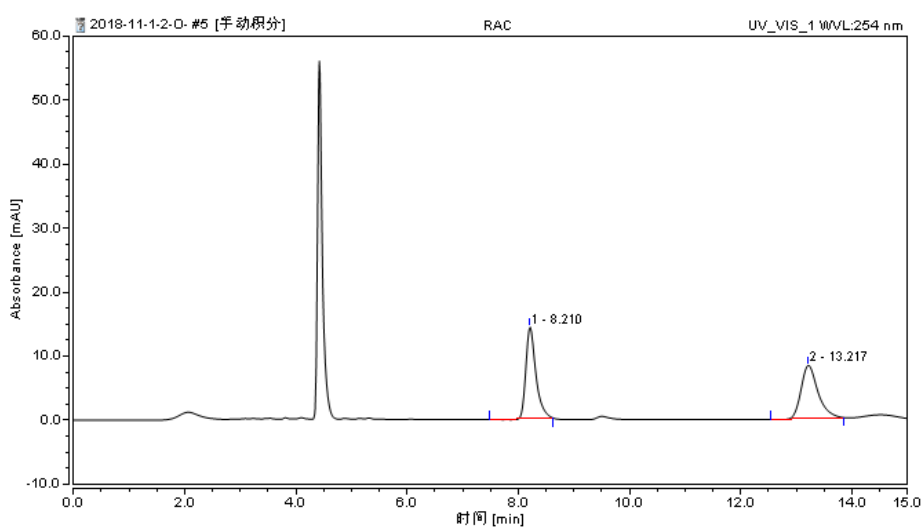

| 序号 | 峰名称 | 保留时间<br>min | 峰面积<br>mAU*min | 峰高<br>mAU | 相对峰面积<br>% | 相对峰高<br>% | 样品量<br>n.a. |
|----|-----|-------------|----------------|-----------|------------|-----------|-------------|
| 1  |     | 8.210       | 2.948          | 14.309    | 50.48      | 63.29     | n.a.        |
| 2  |     | 13.217      | 2.892          | 8.301     | 49.52      | 36.71     | n.a.        |

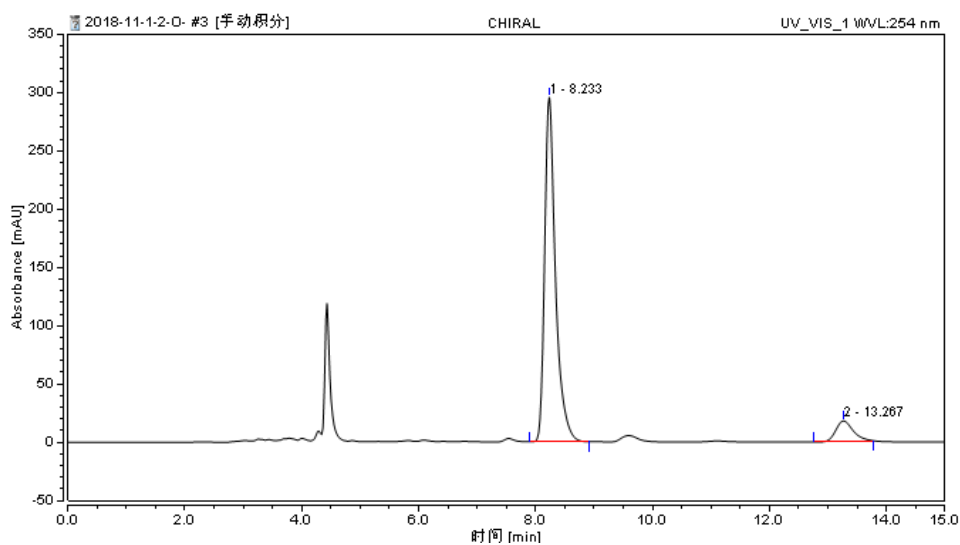

| 序号 | 峰名称 | 保留时间<br>min | 峰面积<br>mAU*min | 峰高<br>mAU | 相对峰面积<br>% | 相对峰高<br>% | 样品量<br>n.a. |
|----|-----|-------------|----------------|-----------|------------|-----------|-------------|
| 1  |     | 8.233       | 63.542         | 295.545   | 91.35      | 94.36     | n.a.        |
| 2  |     | 13.267      | 6.019          | 17.671    | 8.65       | 5.64      | n.a.        |

For comparison of Chinese and English of the HPLC data table.

| 序号    | 峰名<br>称      | 保留时间<br>(min)           | 峰面<br>积<br>(mAU*min)   | 峰高<br>(mAU)             | 相对峰面<br>积 (%)                | 相对峰高<br>(%)                    | 样品量<br>n.a.              |
|-------|--------------|-------------------------|------------------------|-------------------------|------------------------------|--------------------------------|--------------------------|
| Entry | Peak<br>name | Retention<br>time (min) | Peak area<br>(mAU*min) | Peak<br>height<br>(mAU) | Relative<br>peak area<br>(%) | Relative<br>Peak height<br>(%) | Sample<br>volume<br>n.a. |

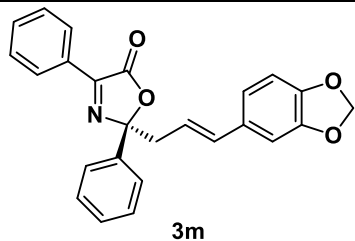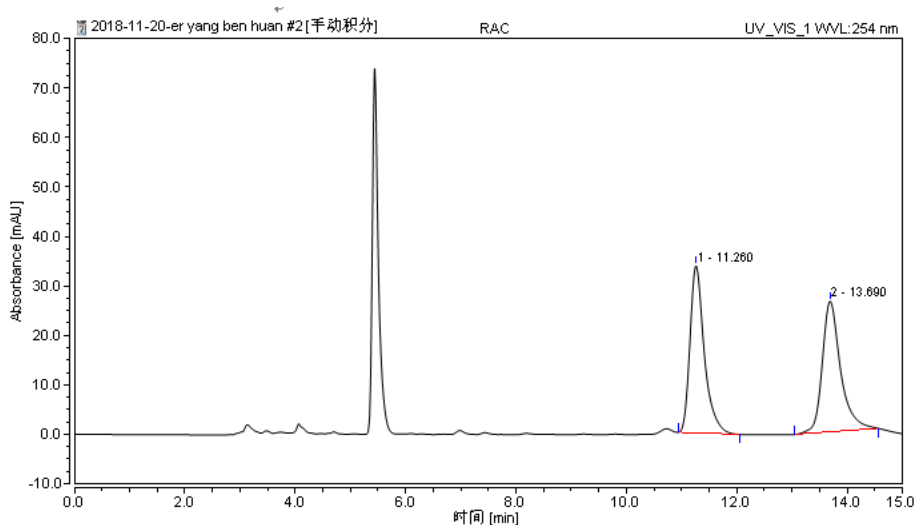

| 序号 | 峰名称 | 保留时间<br>min | 峰面积<br>mAU*min | 峰高<br>mAU | 相对峰面积<br>% | 相对峰高<br>% | 样品量<br>n.a. |
|----|-----|-------------|----------------|-----------|------------|-----------|-------------|
| 1  |     | 11.260      | 10.138         | 33.882    | 49.96      | 56.15     | n.a.        |
| 2  |     | 13.690      | 10.153         | 26.464    | 50.04      | 43.85     | n.a.        |

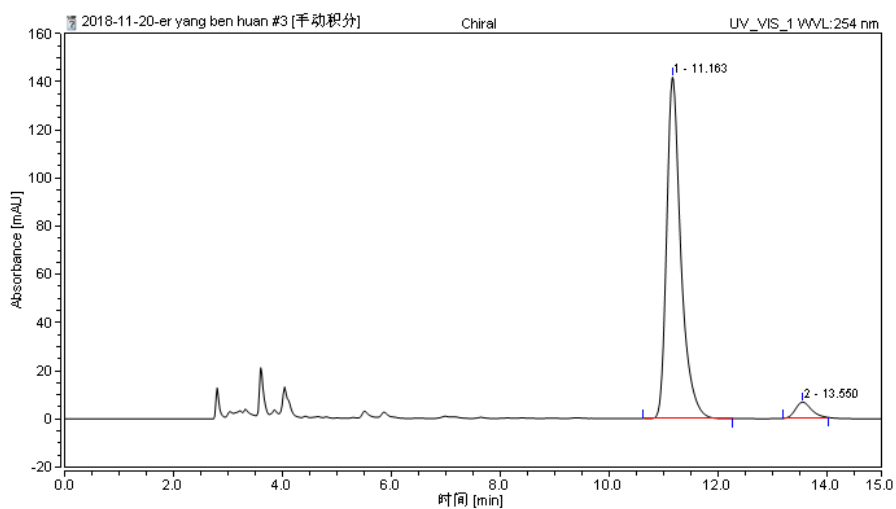

| 序号 | 峰名称 | 保留时间<br>min | 峰面积<br>mAU*min | 峰高<br>mAU | 相对峰面积<br>% | 相对峰高<br>% | 样品量<br>n.a. |
|----|-----|-------------|----------------|-----------|------------|-----------|-------------|
| 1  |     | 11.163      | 42.860         | 141.713   | 95.00      | 95.53     | n.a.        |
| 2  |     | 13.550      | 2.258          | 6.636     | 5.00       | 4.47      | n.a.        |

For comparison of Chinese and English of the HPLC data table.

| 序号    | 峰名称       | 保留时间 (min)           | 峰面积 (mAU*min)       | 峰高 (mAU)          | 相对峰面积 (%)              | 相对峰高 (%)                 | 样品量 n.a.           |
|-------|-----------|----------------------|---------------------|-------------------|------------------------|--------------------------|--------------------|
| Entry | Peak name | Retention time (min) | Peak area (mAU*min) | Peak height (mAU) | Relative peak area (%) | Relative Peak height (%) | Sample volume n.a. |

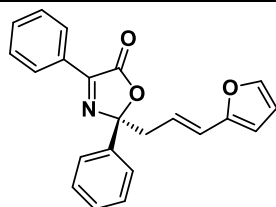

3n

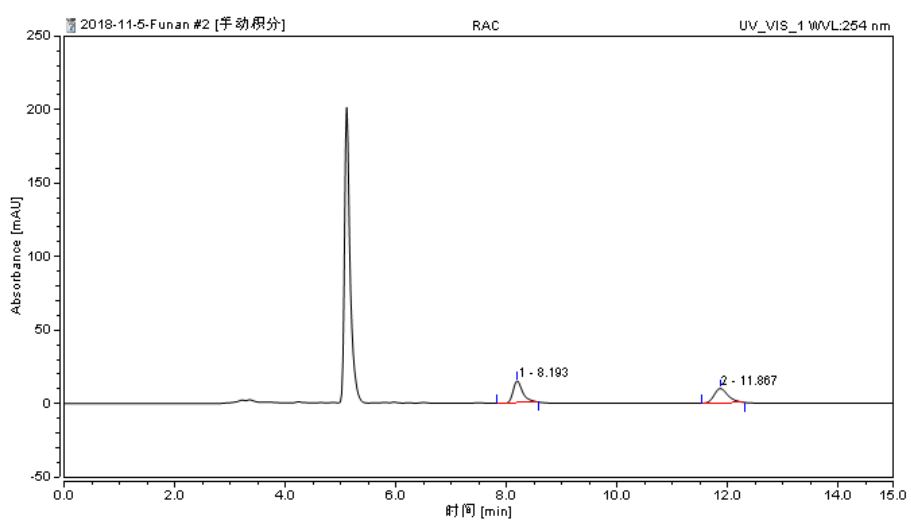

| 序号 | 峰名称 | 保留时间 min | 峰面积 mAU*min | 峰高 mAU | 相对峰面积 % | 相对峰高 % | 样品量 n.a. |
|----|-----|----------|-------------|--------|---------|--------|----------|
| 1  |     | 8.193    | 2.910       | 14.804 | 50.61   | 60.10  | n.a.     |
| 2  |     | 11.867   | 2.840       | 9.827  | 49.39   | 39.90  | n.a.     |

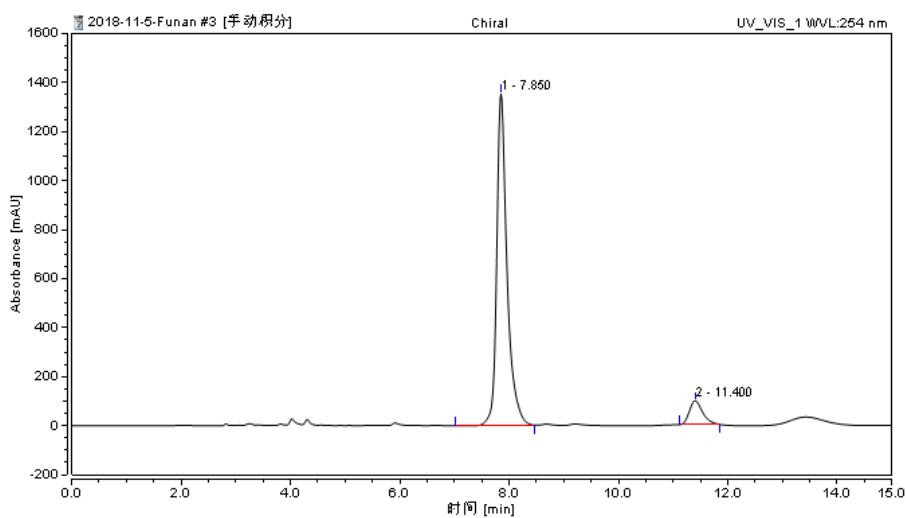

| 序号 | 峰名称 | 保留时间 min | 峰面积 mAU*min | 峰高 mAU   | 相对峰面积 % | 相对峰高 % | 样品量 n.a. |
|----|-----|----------|-------------|----------|---------|--------|----------|
| 1  |     | 7.850    | 293.968     | 1352.735 | 91.62   | 93.35  | n.a.     |
| 2  |     | 11.400   | 26.901      | 96.411   | 8.38    | 6.65   | n.a.     |



For comparison of Chinese and English of the HPLC data table.

| 序号    | 峰名称       | 保留时间 (min)           | 峰面积 (mAU*min)       | 峰高 (mAU)          | 相对峰面积 (%)              | 相对峰高 (%)                 | 样品量 n.a.           |
|-------|-----------|----------------------|---------------------|-------------------|------------------------|--------------------------|--------------------|
| Entry | Peak name | Retention time (min) | Peak area (mAU*min) | Peak height (mAU) | Relative peak area (%) | Relative Peak height (%) | Sample volume n.a. |

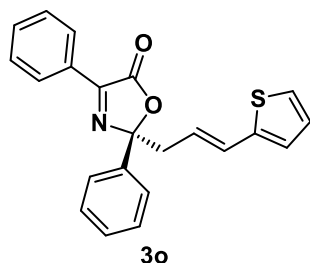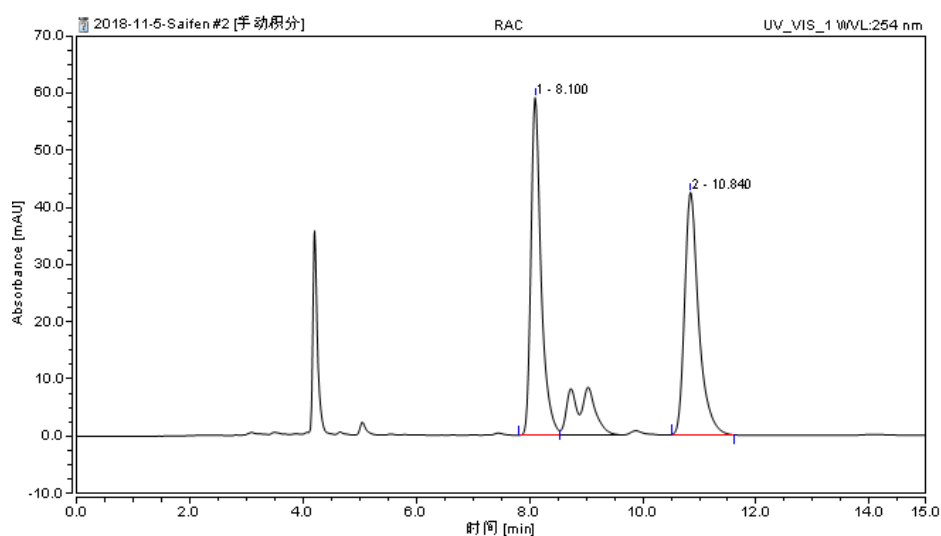

| 序号 | 峰名称 | 保留时间 min | 峰面积 mAU*min | 峰高 mAU | 相对峰面积 % | 相对峰高 % | 样品量 n.a. |
|----|-----|----------|-------------|--------|---------|--------|----------|
| 1  |     | 8.100    | 12.220      | 59.040 | 50.08   | 58.21  | n.a.     |
| 2  |     | 10.840   | 12.184      | 42.383 | 49.92   | 41.79  | n.a.     |

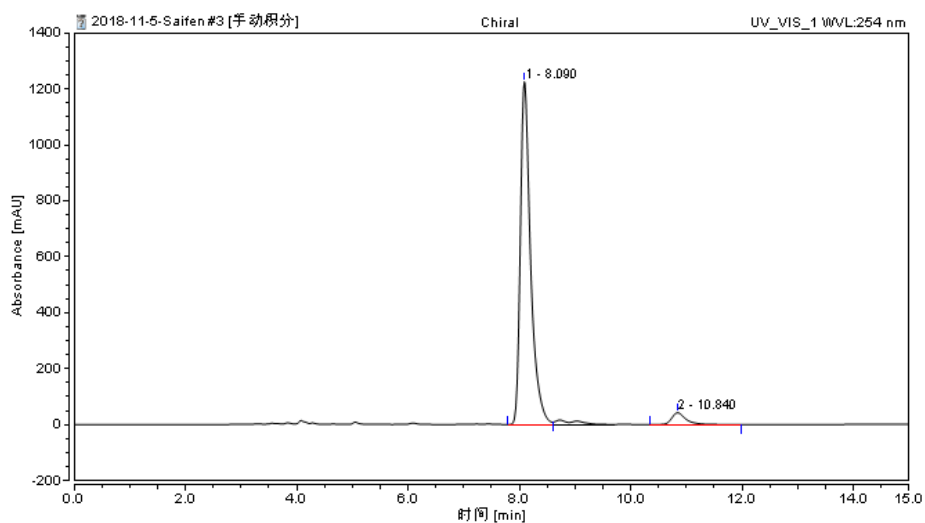

| 序号 | 峰名称 | 保留时间 min | 峰面积 mAU*min | 峰高 mAU   | 相对峰面积 % | 相对峰高 % | 样品量 n.a. |
|----|-----|----------|-------------|----------|---------|--------|----------|
| 1  |     | 8.090    | 261.334     | 1225.964 | 95.48   | 96.65  | n.a.     |
| 2  |     | 10.840   | 12.376      | 42.434   | 4.52    | 3.35   | n.a.     |

For comparison of Chinese and English of the HPLC data table.

| 序号    | 峰名称       | 保留时间 (min)           | 峰面积 (mAU*min)       | 峰高 (mAU)          | 相对峰面积 (%)              | 相对峰高 (%)                 | 样品量 n.a.           |
|-------|-----------|----------------------|---------------------|-------------------|------------------------|--------------------------|--------------------|
| Entry | Peak name | Retention time (min) | Peak area (mAU*min) | Peak height (mAU) | Relative peak area (%) | Relative Peak height (%) | Sample volume n.a. |

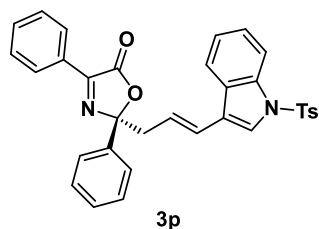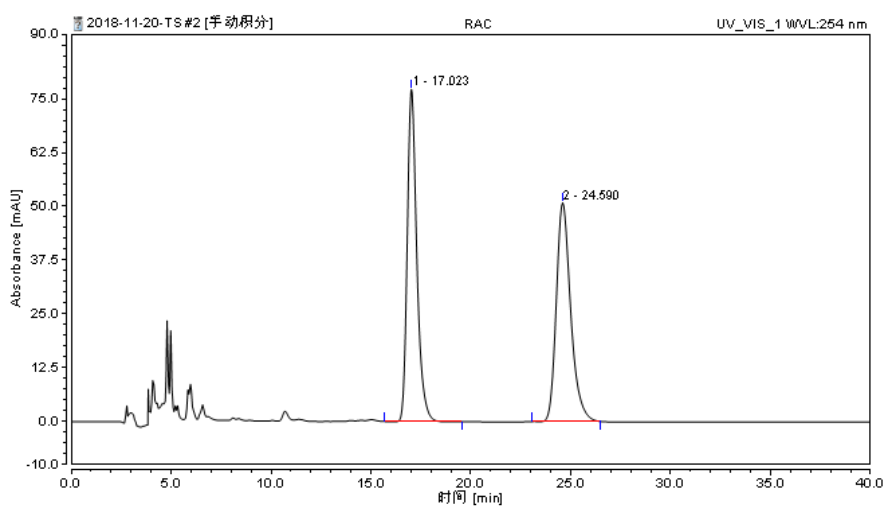

| 序号 | 峰名称 | 保留时间 min | 峰面积 mAU*min | 峰高 mAU | 相对峰面积 % | 相对峰高 % | 样品量 n.a. |
|----|-----|----------|-------------|--------|---------|--------|----------|
| 1  |     | 17.023   | 42.688      | 77.196 | 50.19   | 60.29  | n.a.     |
| 2  |     | 24.590   | 42.372      | 50.845 | 49.81   | 39.71  | n.a.     |

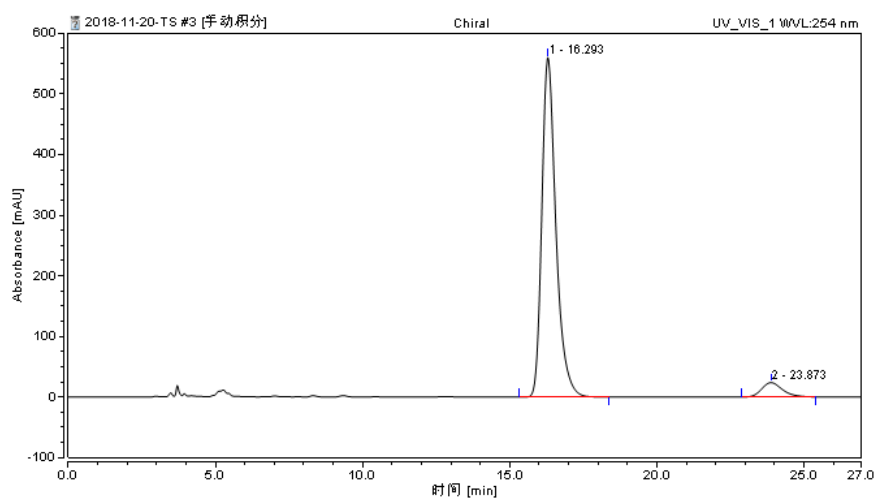

| 序号 | 峰名称 | 保留时间 min | 峰面积 mAU*min | 峰高 mAU  | 相对峰面积 % | 相对峰高 % | 样品量 n.a. |
|----|-----|----------|-------------|---------|---------|--------|----------|
| 1  |     | 16.293   | 310.932     | 560.272 | 94.03   | 95.91  | n.a.     |
| 2  |     | 23.873   | 19.724      | 23.907  | 5.97    | 4.09   | n.a.     |

For comparison of Chinese and English of the HPLC data table.

| 序号    | 峰名称       | 保留时间 (min)           | 峰面积 (mAU*min)       | 峰高 (mAU)          | 相对峰面积 (%)              | 相对峰高 (%)                 | 样品量 n.a.           |
|-------|-----------|----------------------|---------------------|-------------------|------------------------|--------------------------|--------------------|
| Entry | Peak name | Retention time (min) | Peak area (mAU*min) | Peak height (mAU) | Relative peak area (%) | Relative Peak height (%) | Sample volume n.a. |

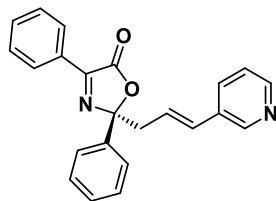

3q

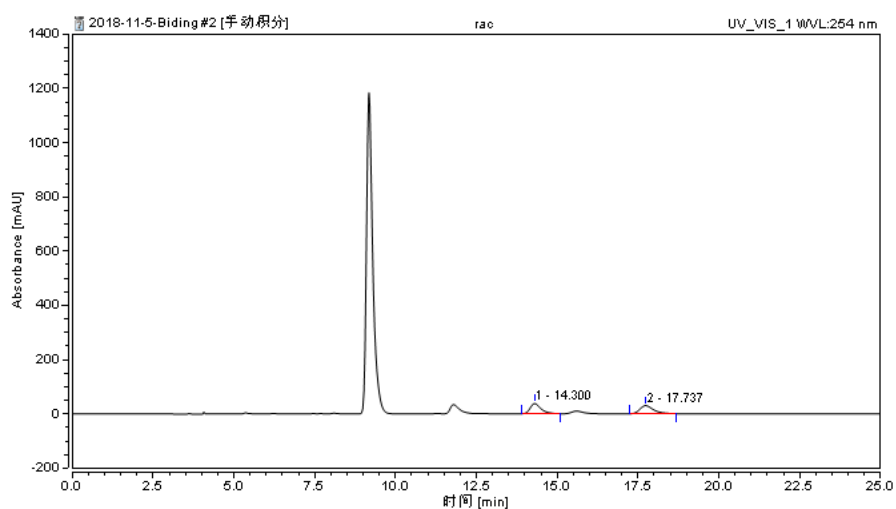

| 序号 | 峰名称 | 保留时间 min | 峰面积 mAU*min | 峰高 mAU | 相对峰面积 % | 相对峰高 % | 样品量 n.a. |
|----|-----|----------|-------------|--------|---------|--------|----------|
| 1  |     | 14.300   | 14.517      | 37.565 | 49.56   | 55.53  | n.a.     |
| 2  |     | 17.737   | 14.772      | 30.083 | 50.44   | 44.47  | n.a.     |

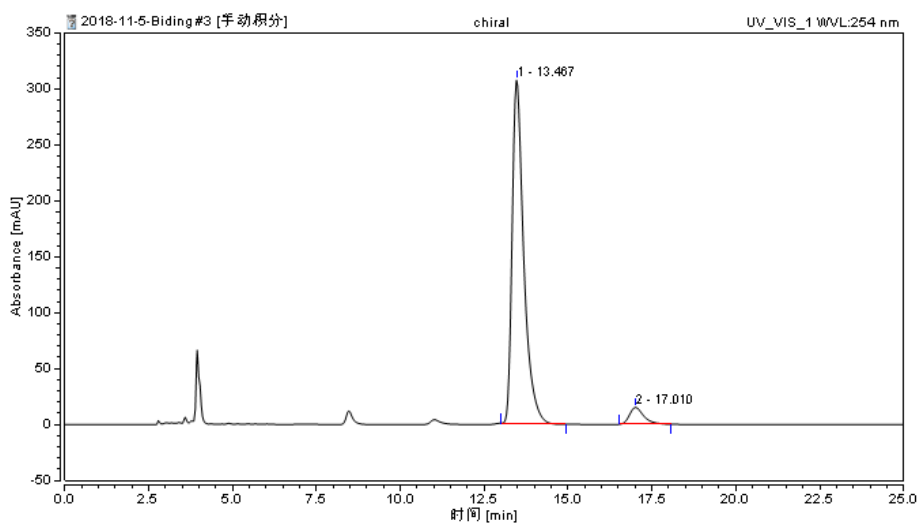

| 序号 | 峰名称 | 保留时间 min | 峰面积 mAU*min | 峰高 mAU  | 相对峰面积 % | 相对峰高 % | 样品量 n.a. |
|----|-----|----------|-------------|---------|---------|--------|----------|
| 1  |     | 13.467   | 122.953     | 307.049 | 94.26   | 95.33  | n.a.     |
| 2  |     | 17.010   | 7.484       | 15.058  | 5.74    | 4.67   | n.a.     |

For comparison of Chinese and English of the HPLC data table.

| 序号    | 峰名称       | 保留时间 (min)           | 峰面积 (mAU*min)       | 峰高 (mAU)          | 相对峰面积 (%)              | 相对峰高 (%)                 | 样品量 n.a.           |
|-------|-----------|----------------------|---------------------|-------------------|------------------------|--------------------------|--------------------|
| Entry | Peak name | Retention time (min) | Peak area (mAU*min) | Peak height (mAU) | Relative peak area (%) | Relative Peak height (%) | Sample volume n.a. |

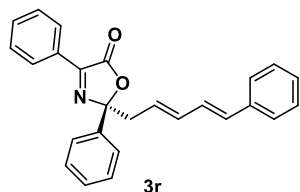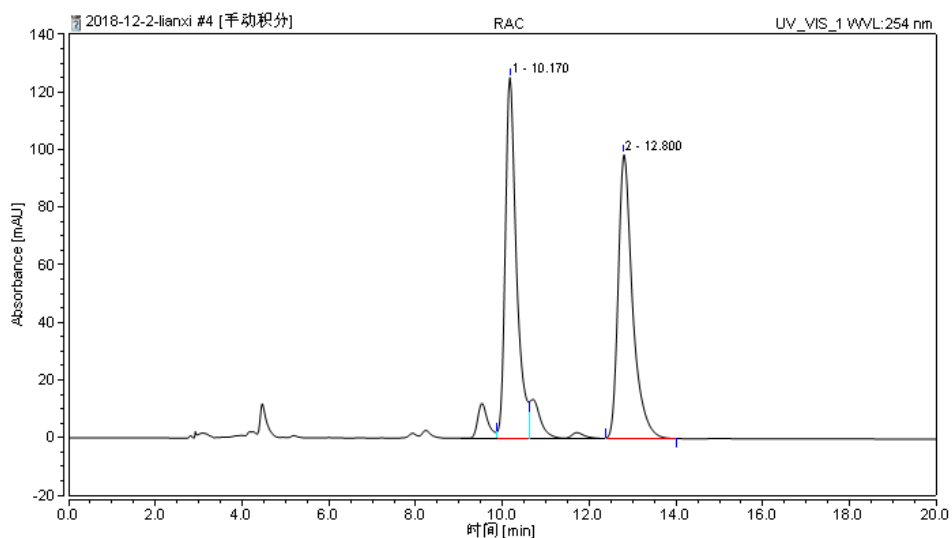

| 序号 | 峰名称 | 保留时间 min | 峰面积 mAU*min | 峰高 mAU  | 相对峰面积 % | 相对峰高 % | 样品量 n.a. |
|----|-----|----------|-------------|---------|---------|--------|----------|
| 1  |     | 10.170   | 37.416      | 125.244 | 49.80   | 55.96  | n.a.     |
| 2  |     | 12.800   | 37.721      | 98.551  | 50.20   | 44.04  | n.a.     |

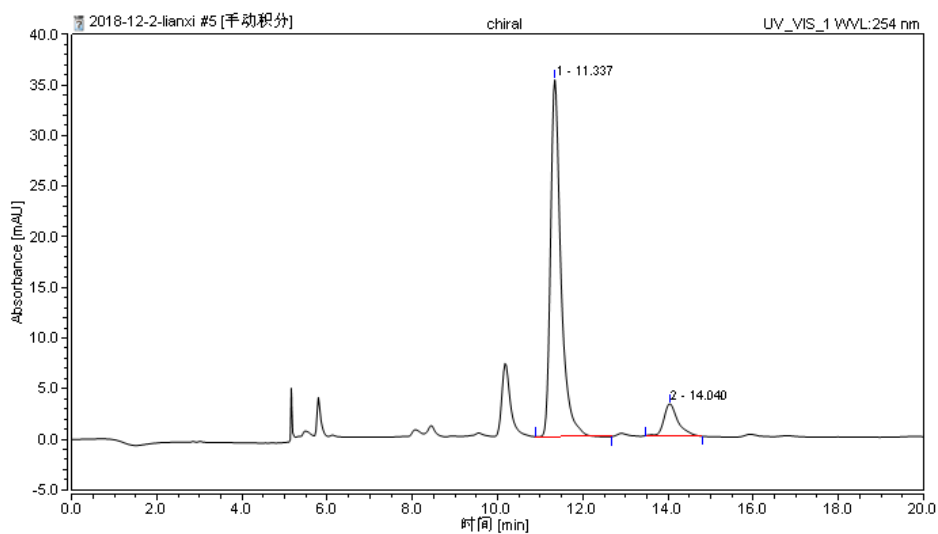

| 序号 | 峰名称 | 保留时间 min | 峰面积 mAU*min | 峰高 mAU | 相对峰面积 % | 相对峰高 % | 样品量 n.a. |
|----|-----|----------|-------------|--------|---------|--------|----------|
| 1  |     | 11.337   | 9.904       | 35.247 | 89.02   | 91.72  | n.a.     |
| 2  |     | 14.040   | 1.222       | 3.181  | 10.98   | 8.28   | n.a.     |

For comparison of Chinese and English of the HPLC data table.

| 序号    | 峰名称       | 保留时间 (min)           | 峰面积 (mAU*min)       | 峰高 (mAU)          | 相对峰面积 (%)              | 相对峰高 (%)                 | 样品量 n.a.           |
|-------|-----------|----------------------|---------------------|-------------------|------------------------|--------------------------|--------------------|
| Entry | Peak name | Retention time (min) | Peak area (mAU*min) | Peak height (mAU) | Relative peak area (%) | Relative Peak height (%) | Sample volume n.a. |

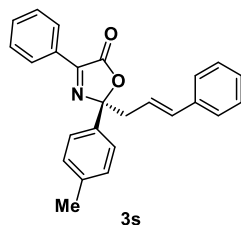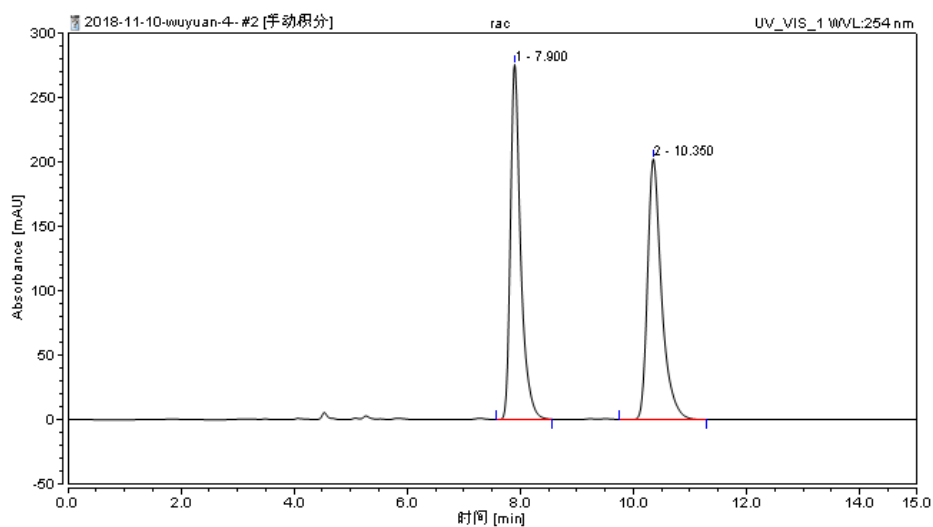

| 序号 | 峰名称 | 保留时间 min | 峰面积 mAU*min | 峰高 mAU  | 相对峰面积 % | 相对峰高 % | 样品量 n.a. |
|----|-----|----------|-------------|---------|---------|--------|----------|
| 1  |     | 7.900    | 57.604      | 275.952 | 49.86   | 57.68  | n.a.     |
| 2  |     | 10.350   | 57.937      | 202.460 | 50.14   | 42.32  | n.a.     |

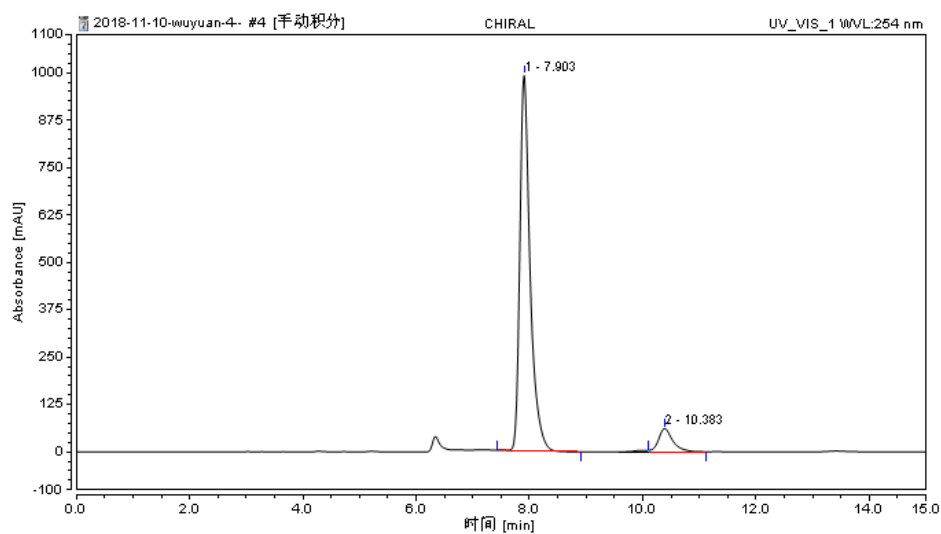

| 序号 | 峰名称 | 保留时间 min | 峰面积 mAU*min | 峰高 mAU  | 相对峰面积 % | 相对峰高 % | 样品量 n.a. |
|----|-----|----------|-------------|---------|---------|--------|----------|
| 1  |     | 7.903    | 206.944     | 990.213 | 92.03   | 94.17  | n.a.     |
| 2  |     | 10.383   | 17.928      | 61.302  | 7.97    | 5.83   | n.a.     |

For comparison of Chinese and English of the HPLC data table.

| 序号    | 峰名<br>称      | 保留时间<br>(min)           | 峰面<br>积<br>(mAU*min)   | 峰高<br>(mAU)             | 相对峰面<br>积 (%)                | 相对峰高<br>(%)                    | 样品量<br>n.a.              |
|-------|--------------|-------------------------|------------------------|-------------------------|------------------------------|--------------------------------|--------------------------|
| Entry | Peak<br>name | Retention<br>time (min) | Peak area<br>(mAU*min) | Peak<br>height<br>(mAU) | Relative<br>peak area<br>(%) | Relative<br>Peak height<br>(%) | Sample<br>volume<br>n.a. |

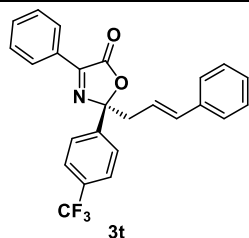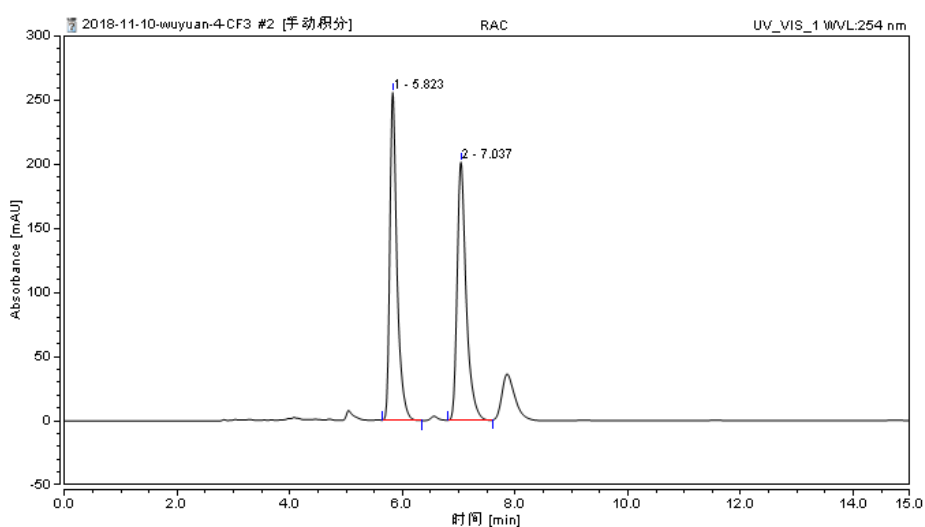

| 序号 | 峰名称 | 保留时间<br>min | 峰面积<br>mAU*min | 峰高<br>mAU | 相对峰面积<br>% | 相对峰高<br>% | 样品量<br>n.a. |
|----|-----|-------------|----------------|-----------|------------|-----------|-------------|
| 1  |     | 5.823       | 37.610         | 255.678   | 50.26      | 55.95     | n.a.        |
| 2  |     | 7.037       | 37.220         | 201.317   | 49.74      | 44.05     | n.a.        |

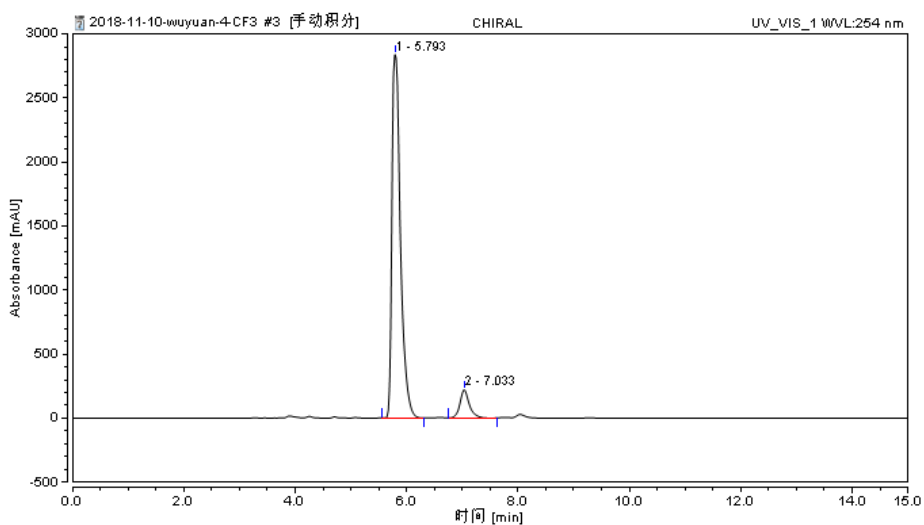

| 序号 | 峰名称 | 保留时间<br>min | 峰面积<br>mAU*min | 峰高<br>mAU | 相对峰面积<br>% | 相对峰高<br>% | 样品量<br>n.a. |
|----|-----|-------------|----------------|-----------|------------|-----------|-------------|
| 1  |     | 5.793       | 500.884        | 2837.454  | 92.24      | 92.81     | n.a.        |
| 2  |     | 7.033       | 42.166         | 219.972   | 7.76       | 7.19      | n.a.        |

For comparison of Chinese and English of the HPLC data table.

| 序号    | 峰名称       | 保留时间 (min)           | 峰面积 (mAU*min)       | 峰高 (mAU)          | 相对峰面积 (%)              | 相对峰高 (%)                 | 样品量 n.a.           |
|-------|-----------|----------------------|---------------------|-------------------|------------------------|--------------------------|--------------------|
| Entry | Peak name | Retention time (min) | Peak area (mAU*min) | Peak height (mAU) | Relative peak area (%) | Relative Peak height (%) | Sample volume n.a. |

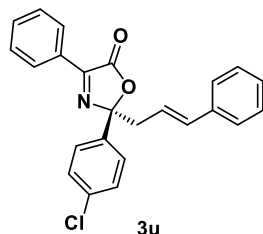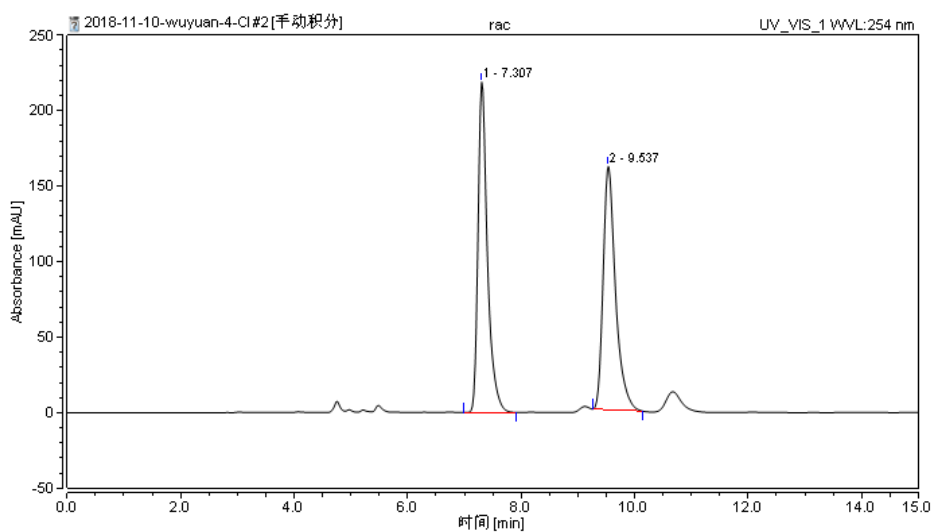

| 序号 | 峰名称 | 保留时间 min | 峰面积 mAU*min | 峰高 mAU  | 相对峰面积 % | 相对峰高 % | 样品量 n.a. |
|----|-----|----------|-------------|---------|---------|--------|----------|
| 1  |     | 7.307    | 41.953      | 218.791 | 50.75   | 57.58  | n.a.     |
| 2  |     | 9.537    | 40.709      | 161.194 | 49.25   | 42.42  | n.a.     |

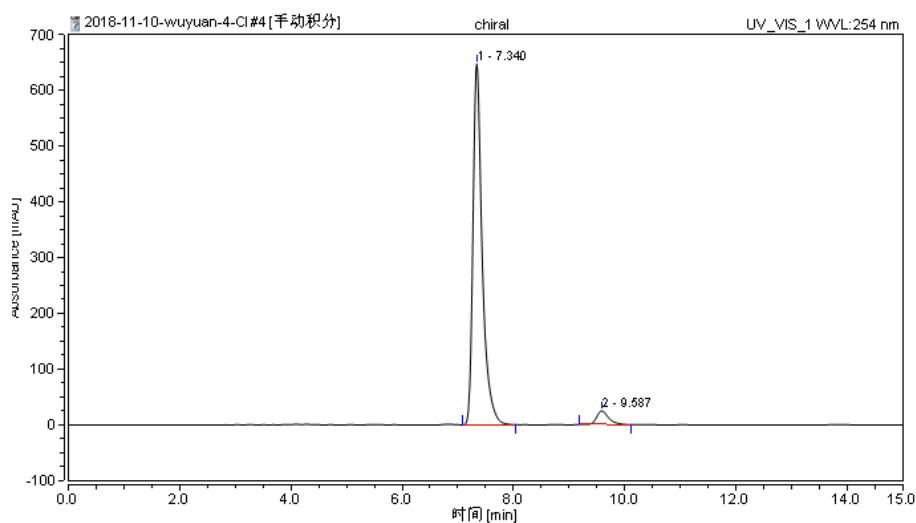

| 序号 | 峰名称 | 保留时间 min | 峰面积 mAU*min | 峰高 mAU  | 相对峰面积 % | 相对峰高 % | 样品量 n.a. |
|----|-----|----------|-------------|---------|---------|--------|----------|
| 1  |     | 7.340    | 124.416     | 647.652 | 95.43   | 96.37  | n.a.     |
| 2  |     | 9.587    | 5.953       | 24.384  | 4.57    | 3.63   | n.a.     |

For comparison of Chinese and English of the HPLC data table.

| 序号    | 峰名称       | 保留时间 (min)           | 峰面积 (mAU*min)       | 峰高 (mAU)          | 相对峰面积 (%)              | 相对峰高 (%)                 | 样品量 n.a.           |
|-------|-----------|----------------------|---------------------|-------------------|------------------------|--------------------------|--------------------|
| Entry | Peak name | Retention time (min) | Peak area (mAU*min) | Peak height (mAU) | Relative peak area (%) | Relative Peak height (%) | Sample volume n.a. |

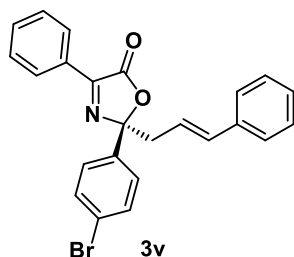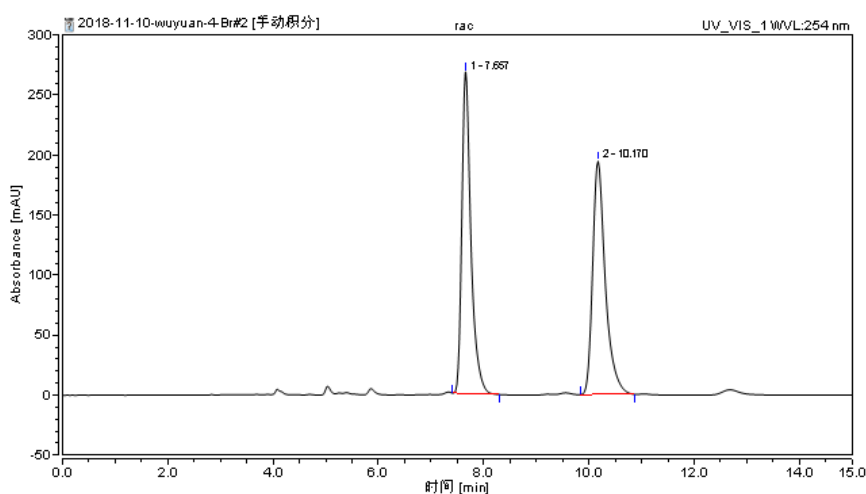

| 序号 | 峰名称 | 保留时间 min | 峰面积 mAU*min | 峰高 mAU  | 相对峰面积 % | 相对峰高 % | 样品量 n.a. |
|----|-----|----------|-------------|---------|---------|--------|----------|
| 1  |     | 7.657    | 53.517      | 267.936 | 49.72   | 57.92  | n.a.     |
| 2  |     | 10.170   | 54.128      | 194.634 | 50.28   | 42.08  | n.a.     |

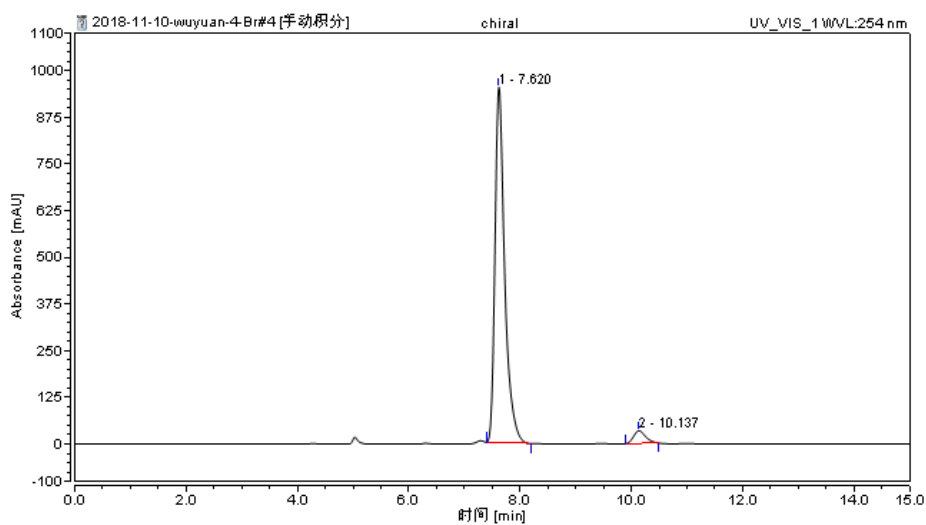

| 序号 | 峰名称 | 保留时间 min | 峰面积 mAU*min | 峰高 mAU  | 相对峰面积 % | 相对峰高 % | 样品量 n.a. |
|----|-----|----------|-------------|---------|---------|--------|----------|
| 1  |     | 7.620    | 191.287     | 952.523 | 95.68   | 96.52  | n.a.     |
| 2  |     | 10.137   | 8.633       | 34.375  | 4.32    | 3.48   | n.a.     |



For comparison of Chinese and English of the HPLC data table.

| 序号    | 峰名<br>称      | 保留时间<br>(min)           | 峰面<br>积<br>(mAU*min)   | 峰高<br>(mAU)             | 相对峰面<br>积 (%)                | 相对峰高<br>(%)                    | 样品量<br>n.a.              |
|-------|--------------|-------------------------|------------------------|-------------------------|------------------------------|--------------------------------|--------------------------|
| Entry | Peak<br>name | Retention<br>time (min) | Peak area<br>(mAU*min) | Peak<br>height<br>(mAU) | Relative<br>peak area<br>(%) | Relative<br>Peak height<br>(%) | Sample<br>volume<br>n.a. |

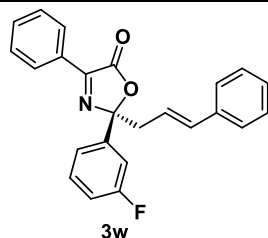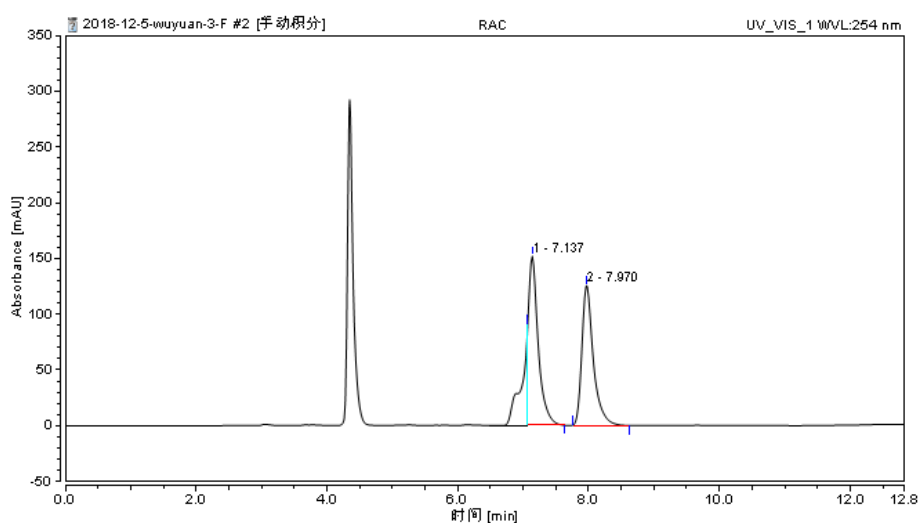

| 序号 | 峰名称 | 保留时间<br>min | 峰面积<br>mAU*min | 峰高<br>mAU | 相对峰面积<br>% | 相对峰高<br>% | 样品量<br>n.a. |
|----|-----|-------------|----------------|-----------|------------|-----------|-------------|
| 1  |     | 7.137       | 25.909         | 152.089   | 50.28      | 54.77     | n.a.        |
| 2  |     | 7.970       | 25.616         | 125.619   | 49.72      | 45.23     | n.a.        |

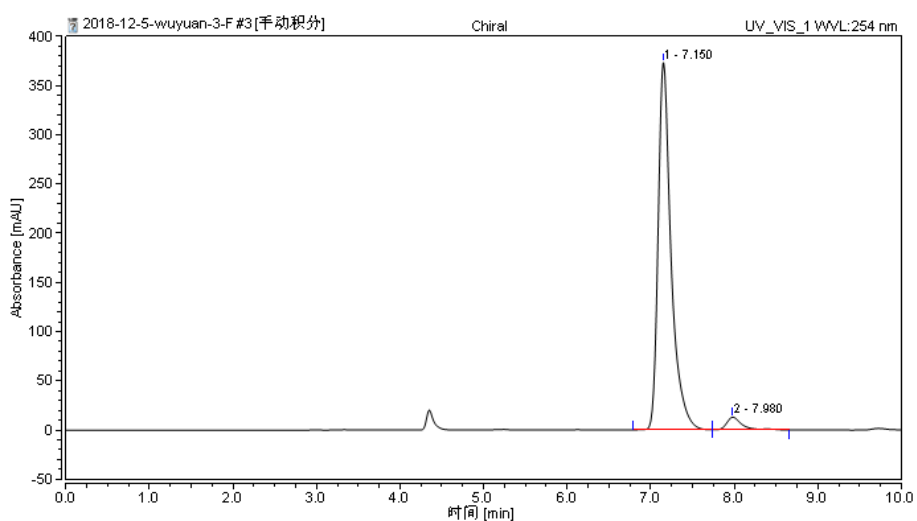

| 序号 | 峰名称 | 保留时间<br>min | 峰面积<br>mAU*min | 峰高<br>mAU | 相对峰面积<br>% | 相对峰高<br>% | 样品量<br>n.a. |
|----|-----|-------------|----------------|-----------|------------|-----------|-------------|
| 1  |     | 7.150       | 67.089         | 373.091   | 95.97      | 96.63     | n.a.        |
| 2  |     | 7.980       | 2.820          | 13.031    | 4.03       | 3.37      | n.a.        |

For comparison of Chinese and English of the HPLC data table.

| 序号    | 峰名称       | 保留时间 (min)           | 峰面积 (mAU*min)       | 峰高 (mAU)          | 相对峰面积 (%)              | 相对峰高 (%)                 | 样品量 n.a.           |
|-------|-----------|----------------------|---------------------|-------------------|------------------------|--------------------------|--------------------|
| Entry | Peak name | Retention time (min) | Peak area (mAU*min) | Peak height (mAU) | Relative peak area (%) | Relative Peak height (%) | Sample volume n.a. |

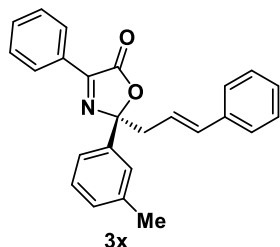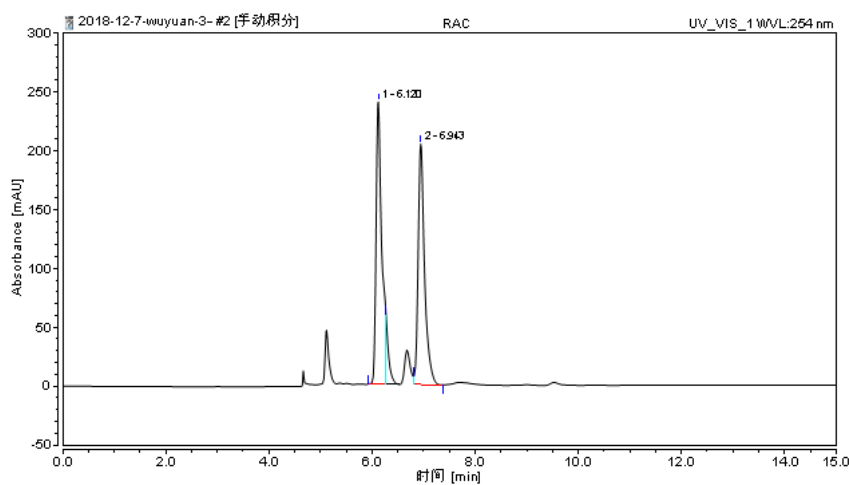

| 序号 | 峰名称 | 保留时间 min | 峰面积 mAU*min | 峰高 mAU  | 相对峰面积 % | 相对峰高 % | 样品量 n.a. |
|----|-----|----------|-------------|---------|---------|--------|----------|
| 1  |     | 6.120    | 30.151      | 239.436 | 50.72   | 53.94  | n.a.     |
| 2  |     | 6.943    | 29.298      | 204.421 | 49.28   | 46.06  | n.a.     |

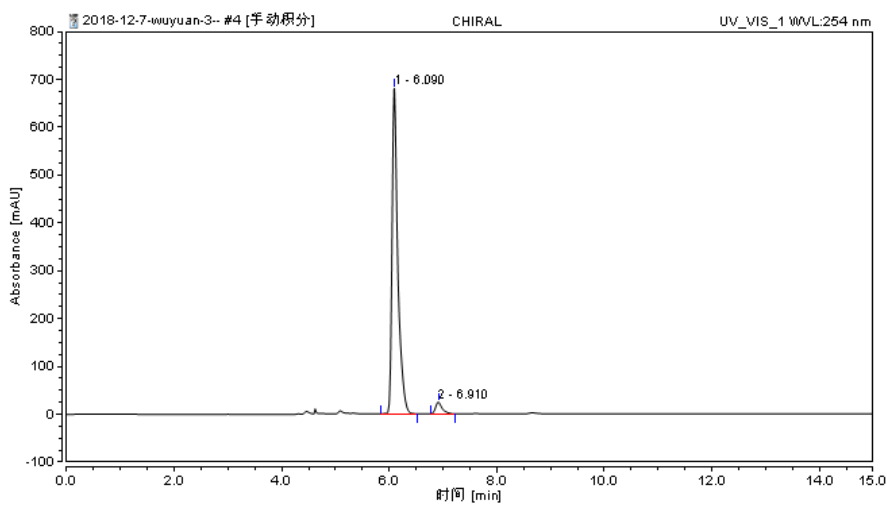

| 序号 | 峰名称 | 保留时间 min | 峰面积 mAU*min | 峰高 mAU  | 相对峰面积 % | 相对峰高 % | 样品量 n.a. |
|----|-----|----------|-------------|---------|---------|--------|----------|
| 1  |     | 6.090    | 84.599      | 680.483 | 96.03   | 96.48  | n.a.     |
| 2  |     | 6.910    | 3.500       | 24.823  | 3.97    | 3.52   | n.a.     |

For comparison of Chinese and English of the HPLC data table.

| 序号    | 峰名称       | 保留时间 (min)           | 峰面积 (mAU*min)       | 峰高 (mAU)          | 相对峰面积 (%)              | 相对峰高 (%)                 | 样品量 n.a.           |
|-------|-----------|----------------------|---------------------|-------------------|------------------------|--------------------------|--------------------|
| Entry | Peak name | Retention time (min) | Peak area (mAU*min) | Peak height (mAU) | Relative peak area (%) | Relative Peak height (%) | Sample volume n.a. |

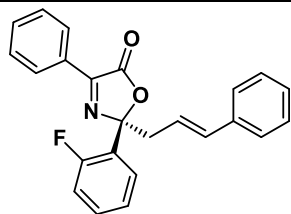

3y

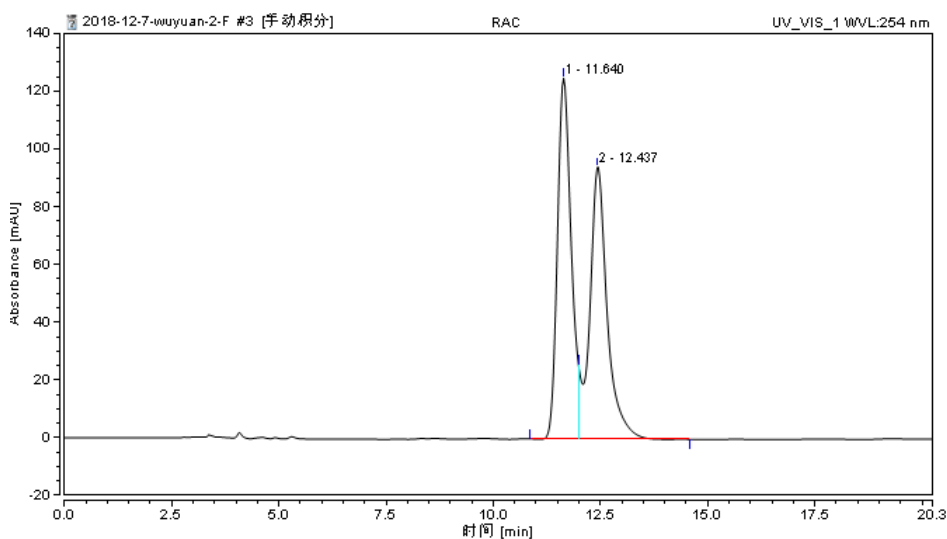

| 序号 | 峰名称 | 保留时间 min | 峰面积 mAU*min | 峰高 mAU  | 相对峰面积 % | 相对峰高 % | 样品量 n.a. |
|----|-----|----------|-------------|---------|---------|--------|----------|
| 1  |     | 11.640   | 45.092      | 125.014 | 49.80   | 56.99  | n.a.     |
| 2  |     | 12.437   | 45.452      | 94.357  | 50.20   | 43.01  | n.a.     |

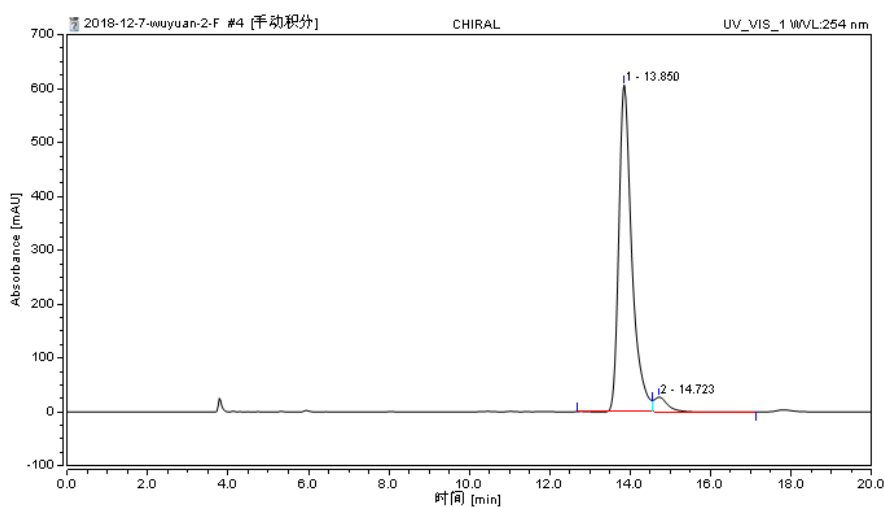

| 序号 | 峰名称 | 保留时间 min | 峰面积 mAU*min | 峰高 mAU  | 相对峰面积 % | 相对峰高 % | 样品量 n.a. |
|----|-----|----------|-------------|---------|---------|--------|----------|
| 1  |     | 13.850   | 227.006     | 606.502 | 95.61   | 95.71  | n.a.     |
| 2  |     | 14.723   | 10.412      | 27.211  | 4.39    | 4.29   | n.a.     |

For comparison of Chinese and English of the HPLC data table.

| 序号    | 峰名称       | 保留时间 (min)           | 峰面积 (mAU*min)       | 峰高 (mAU)          | 相对峰面积 (%)              | 相对峰高 (%)                 | 样品量 n.a.           |
|-------|-----------|----------------------|---------------------|-------------------|------------------------|--------------------------|--------------------|
| Entry | Peak name | Retention time (min) | Peak area (mAU*min) | Peak height (mAU) | Relative peak area (%) | Relative Peak height (%) | Sample volume n.a. |

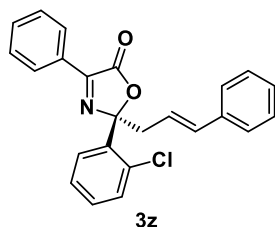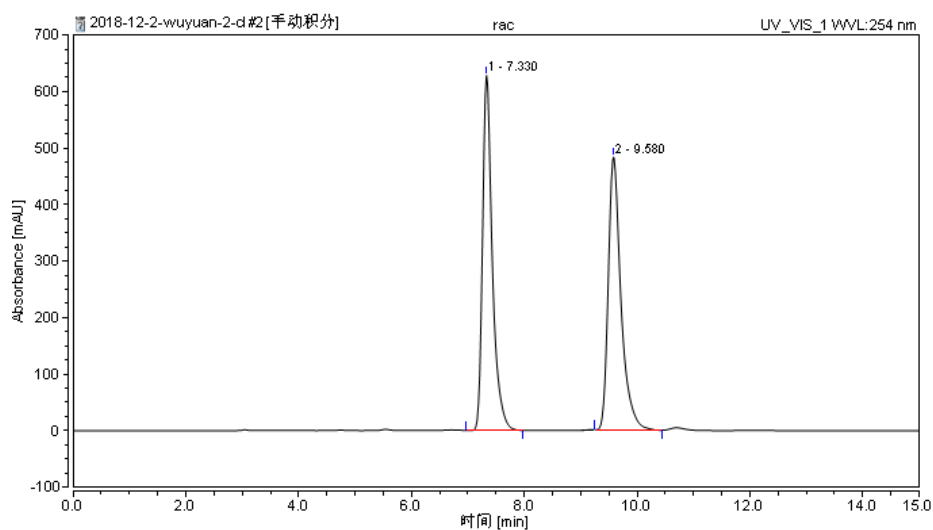

| 序号 | 峰名称 | 保留时间 min | 峰面积 mAU*min | 峰高 mAU  | 相对峰面积 % | 相对峰高 % | 样品量 n.a. |
|----|-----|----------|-------------|---------|---------|--------|----------|
| 1  |     | 7.330    | 126.031     | 628.481 | 49.96   | 56.50  | n.a.     |
| 2  |     | 9.580    | 126.239     | 483.966 | 50.04   | 43.50  | n.a.     |

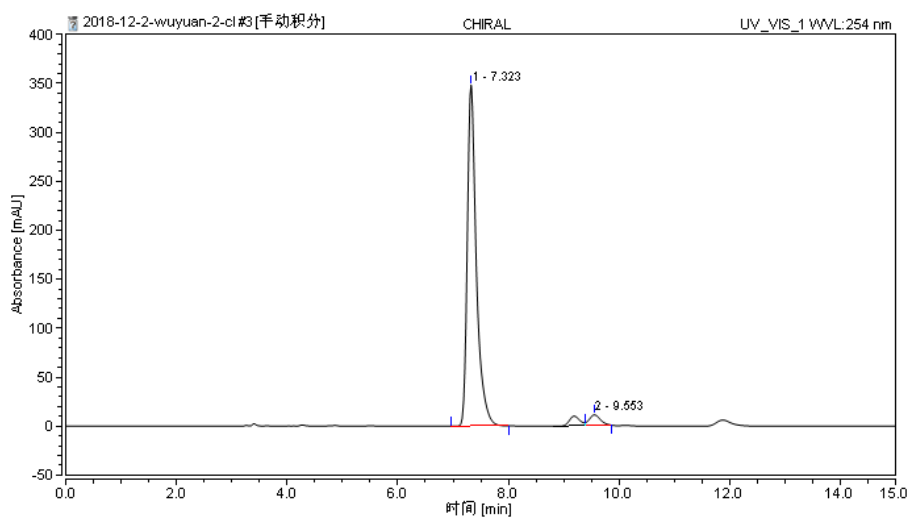

| 序号 | 峰名称 | 保留时间 min | 峰面积 mAU*min | 峰高 mAU  | 相对峰面积 % | 相对峰高 % | 样品量 n.a. |
|----|-----|----------|-------------|---------|---------|--------|----------|
| 1  |     | 7.323    | 65.793      | 348.274 | 96.18   | 96.94  | n.a.     |
| 2  |     | 9.553    | 2.612       | 10.998  | 3.82    | 3.06   | n.a.     |

For comparison of Chinese and English of the HPLC data table.

| 序号    | 峰名称       | 保留时间 (min)           | 峰面积 (mAU*min)       | 峰高 (mAU)          | 相对峰面积 (%)              | 相对峰高 (%)                 | 样品量 n.a.           |
|-------|-----------|----------------------|---------------------|-------------------|------------------------|--------------------------|--------------------|
| Entry | Peak name | Retention time (min) | Peak area (mAU*min) | Peak height (mAU) | Relative peak area (%) | Relative Peak height (%) | Sample volume n.a. |

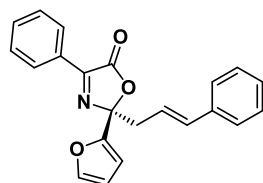

3a'

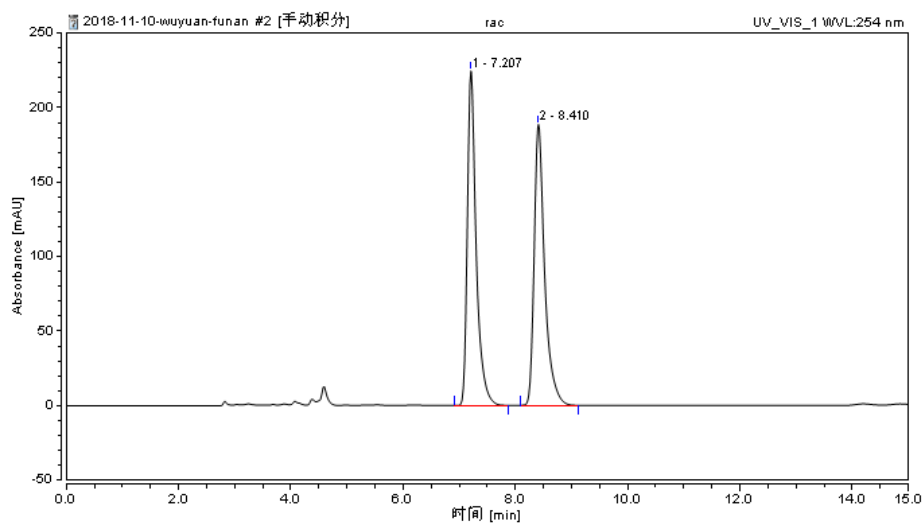

| 序号 | 峰名称 | 保留时间 min | 峰面积 mAU*min | 峰高 mAU  | 相对峰面积 % | 相对峰高 % | 样品量 n.a. |
|----|-----|----------|-------------|---------|---------|--------|----------|
| 1  |     | 7.207    | 40.871      | 224.566 | 50.04   | 54.35  | n.a.     |
| 2  |     | 8.410    | 40.811      | 188.633 | 49.96   | 45.65  | n.a.     |

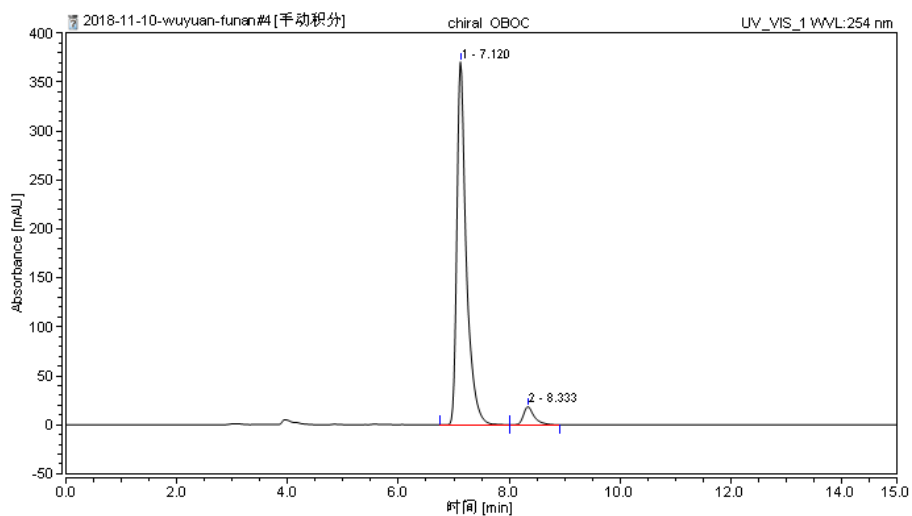

| 序号 | 峰名称 | 保留时间 min | 峰面积 mAU*min | 峰高 mAU  | 相对峰面积 % | 相对峰高 % | 样品量 n.a. |
|----|-----|----------|-------------|---------|---------|--------|----------|
| 1  |     | 7.120    | 73.004      | 370.577 | 94.63   | 95.26  | n.a.     |
| 2  |     | 8.333    | 4.140       | 18.430  | 5.37    | 4.74   | n.a.     |

For comparison of Chinese and English of the HPLC data table.

| 序号    | 峰名称       | 保留时间 (min)           | 峰面积 (mAU*min)       | 峰高 (mAU)          | 相对峰面积 (%)              | 相对峰高 (%)                 | 样品量 n.a.           |
|-------|-----------|----------------------|---------------------|-------------------|------------------------|--------------------------|--------------------|
| Entry | Peak name | Retention time (min) | Peak area (mAU*min) | Peak height (mAU) | Relative peak area (%) | Relative Peak height (%) | Sample volume n.a. |

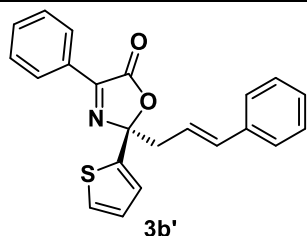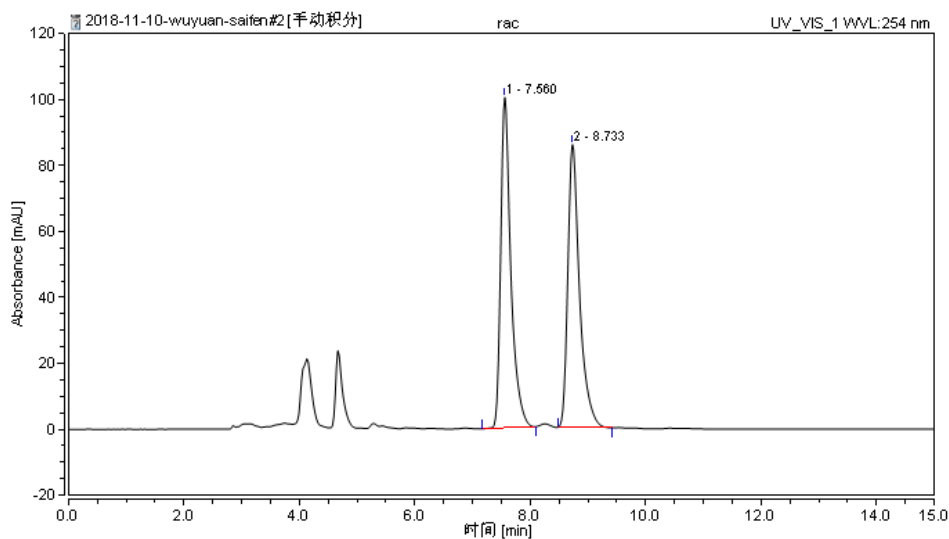

| 序号 | 峰名称 | 保留时间 min | 峰面积 mAU*min | 峰高 mAU  | 相对峰面积 % | 相对峰高 % | 样品量 n.a. |
|----|-----|----------|-------------|---------|---------|--------|----------|
| 1  |     | 7.560    | 20.341      | 100.254 | 50.23   | 53.88  | n.a.     |
| 2  |     | 8.733    | 20.156      | 85.803  | 49.77   | 46.12  | n.a.     |

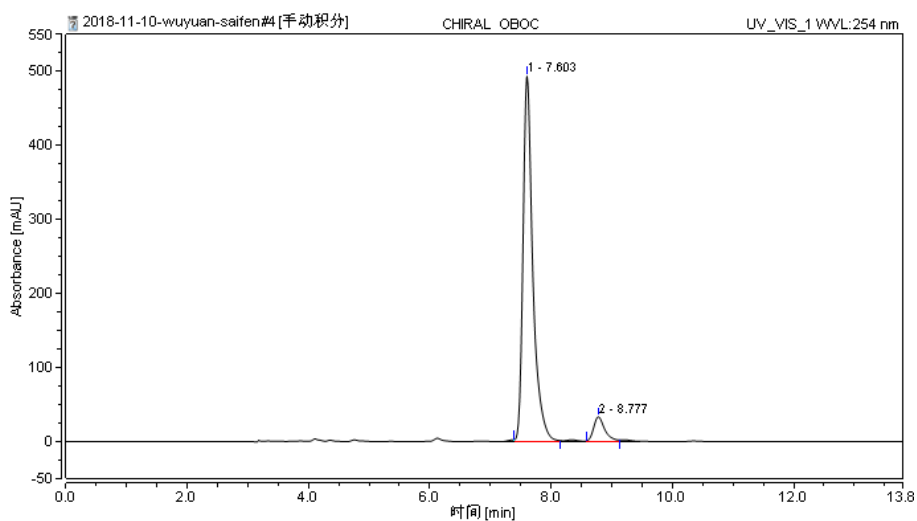

| 序号 | 峰名称 | 保留时间 min | 峰面积 mAU*min | 峰高 mAU  | 相对峰面积 % | 相对峰高 % | 样品量 n.a. |
|----|-----|----------|-------------|---------|---------|--------|----------|
| 1  |     | 7.603    | 92.363      | 493.365 | 92.80   | 93.69  | n.a.     |
| 2  |     | 8.777    | 7.168       | 33.241  | 7.20    | 6.31   | n.a.     |

For comparison of Chinese and English of the HPLC data table.

| 序号    | 峰名称       | 保留时间 (min)           | 峰面积 (mAU*min)       | 峰高 (mAU)          | 相对峰面积 (%)              | 相对峰高 (%)                 | 样品量 n.a.           |
|-------|-----------|----------------------|---------------------|-------------------|------------------------|--------------------------|--------------------|
| Entry | Peak name | Retention time (min) | Peak area (mAU*min) | Peak height (mAU) | Relative peak area (%) | Relative Peak height (%) | Sample volume n.a. |

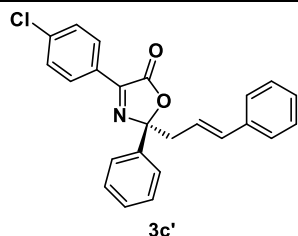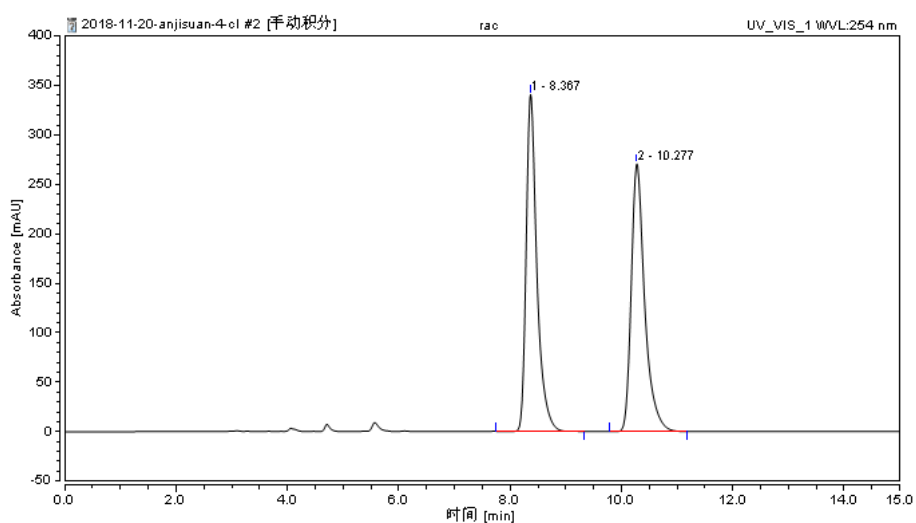

| 序号 | 峰名称 | 保留时间 min | 峰面积 mAU*min | 峰高 mAU  | 相对峰面积 % | 相对峰高 % | 样品量 n.a. |
|----|-----|----------|-------------|---------|---------|--------|----------|
| 1  |     | 8.367    | 75.850      | 340.789 | 50.05   | 55.73  | n.a.     |
| 2  |     | 10.277   | 75.700      | 270.706 | 49.95   | 44.27  | n.a.     |

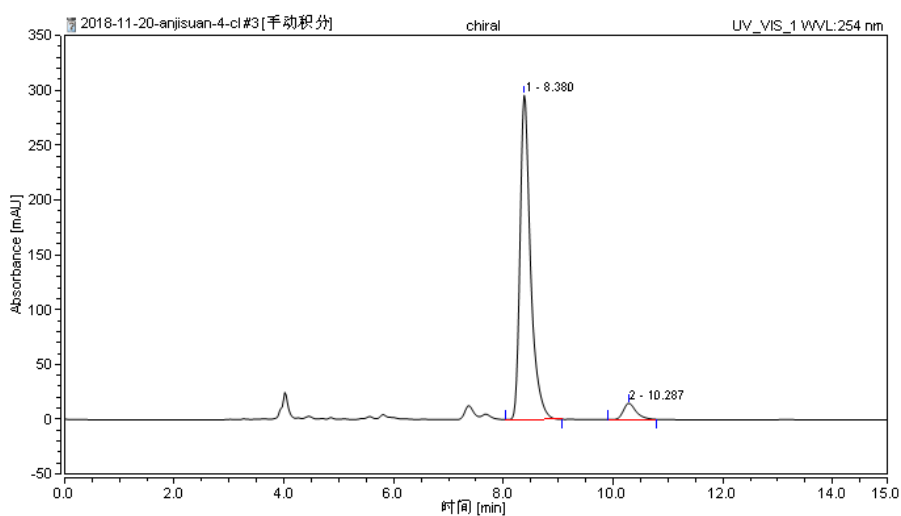

| 序号 | 峰名称 | 保留时间 min | 峰面积 mAU*min | 峰高 mAU  | 相对峰面积 % | 相对峰高 % | 样品量 n.a. |
|----|-----|----------|-------------|---------|---------|--------|----------|
| 1  |     | 8.380    | 65.591      | 295.898 | 94.23   | 95.21  | n.a.     |
| 2  |     | 10.287   | 4.020       | 14.887  | 5.77    | 4.79   | n.a.     |

For comparison of Chinese and English of the HPLC data table.

| 序号    | 峰名称       | 保留时间 (min)           | 峰面积 (mAU*min)       | 峰高 (mAU)          | 相对峰面积 (%)              | 相对峰高 (%)                 | 样品量 n.a.           |
|-------|-----------|----------------------|---------------------|-------------------|------------------------|--------------------------|--------------------|
| Entry | Peak name | Retention time (min) | Peak area (mAU*min) | Peak height (mAU) | Relative peak area (%) | Relative Peak height (%) | Sample volume n.a. |

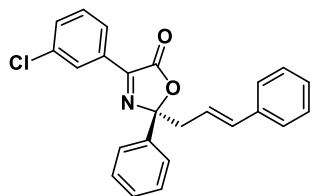

3d'

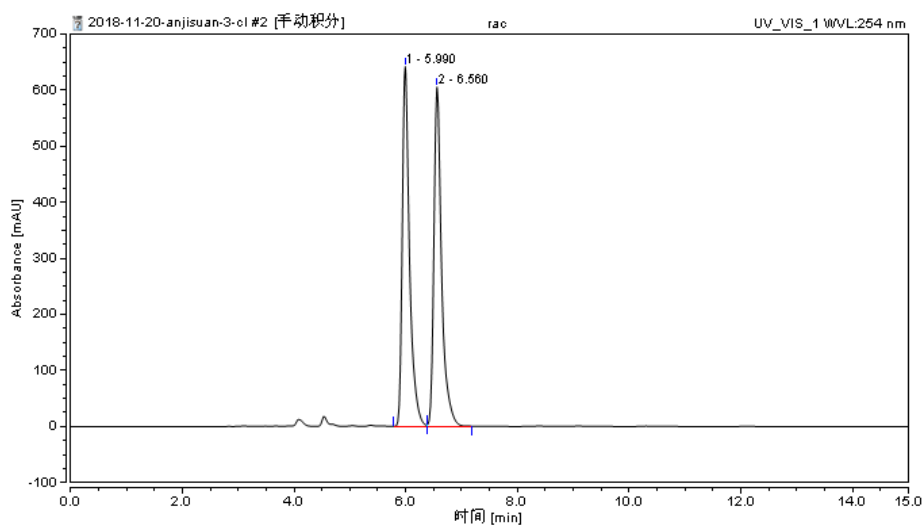

| 序号 | 峰名称 | 保留时间 min | 峰面积 mAU*min | 峰高 mAU  | 相对峰面积 % | 相对峰高 % | 样品量 n.a. |
|----|-----|----------|-------------|---------|---------|--------|----------|
| 1  |     | 5.990    | 96.373      | 641.873 | 49.98   | 51.47  | n.a.     |
| 2  |     | 6.560    | 96.455      | 605.330 | 50.02   | 48.53  | n.a.     |

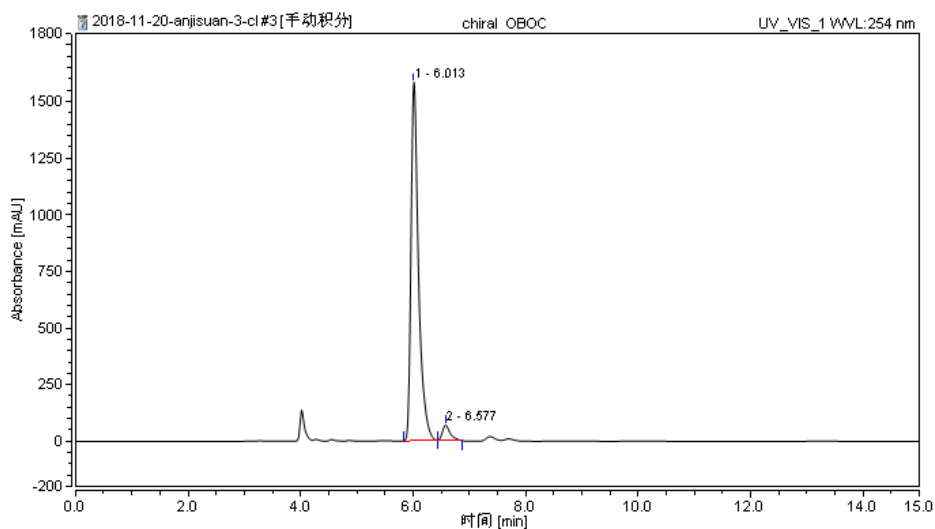

| 序号 | 峰名称 | 保留时间 min | 峰面积 mAU*min | 峰高 mAU   | 相对峰面积 % | 相对峰高 % | 样品量 n.a. |
|----|-----|----------|-------------|----------|---------|--------|----------|
| 1  |     | 6.013    | 244.246     | 1584.776 | 95.79   | 95.89  | n.a.     |
| 2  |     | 6.577    | 10.741      | 67.904   | 4.21    | 4.11   | n.a.     |



For comparison of Chinese and English of the HPLC data table.

| 序号    | 峰名称       | 保留时间 (min)           | 峰面积 (mAU*min)       | 峰高 (mAU)          | 相对峰面积 (%)              | 相对峰高 (%)                 | 样品量 n.a.           |
|-------|-----------|----------------------|---------------------|-------------------|------------------------|--------------------------|--------------------|
| Entry | Peak name | Retention time (min) | Peak area (mAU*min) | Peak height (mAU) | Relative peak area (%) | Relative Peak height (%) | Sample volume n.a. |

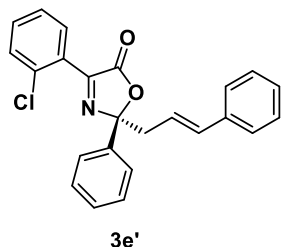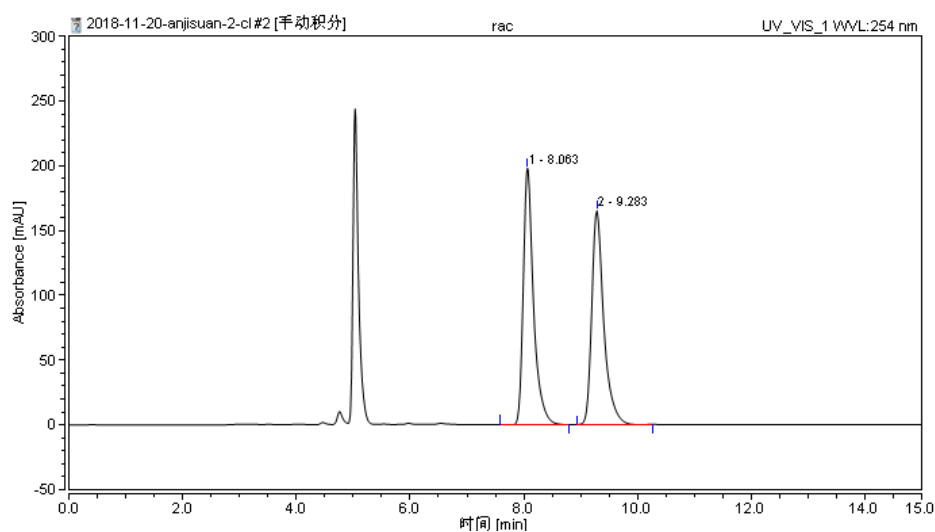

| 序号 | 峰名称 | 保留时间 min | 峰面积 mAU*min | 峰高 mAU  | 相对峰面积 % | 相对峰高 % | 样品量 n.a. |
|----|-----|----------|-------------|---------|---------|--------|----------|
| 1  |     | 8.063    | 41.324      | 198.143 | 50.63   | 54.51  | n.a.     |
| 2  |     | 9.283    | 40.289      | 165.379 | 49.37   | 45.49  | n.a.     |

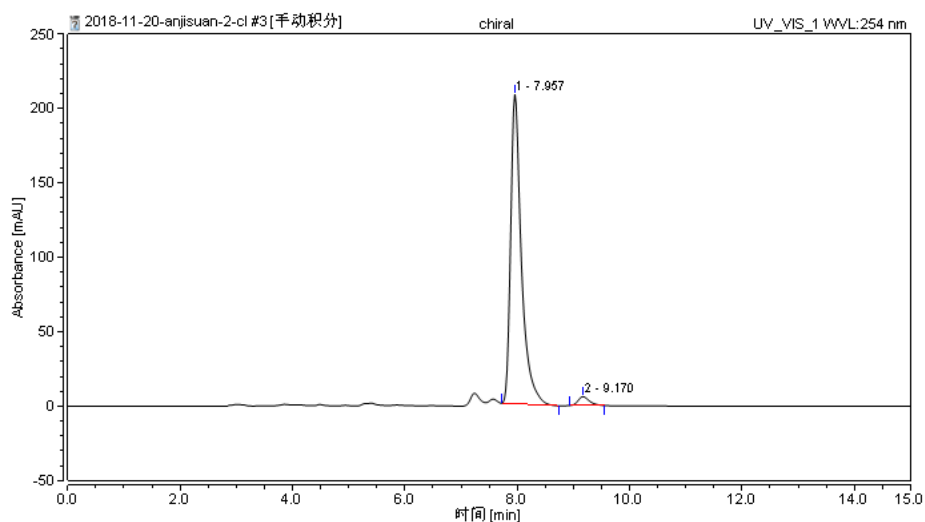

| 序号 | 峰名称 | 保留时间 min | 峰面积 mAU*min | 峰高 mAU  | 相对峰面积 % | 相对峰高 % | 样品量 n.a. |
|----|-----|----------|-------------|---------|---------|--------|----------|
| 1  |     | 7.957    | 46.057      | 207.804 | 97.11   | 97.22  | n.a.     |
| 2  |     | 9.170    | 1.373       | 5.948   | 2.89    | 2.78   | n.a.     |

For comparison of Chinese and English of the HPLC data table.

| 序号    | 峰名<br>称      | 保留时间<br>(min)           | 峰面<br>积<br>(mAU*min)   | 峰高<br>(mAU)             | 相对峰面<br>积 (%)                | 相对峰高<br>(%)                    | 样品量<br>n.a.              |
|-------|--------------|-------------------------|------------------------|-------------------------|------------------------------|--------------------------------|--------------------------|
| Entry | Peak<br>name | Retention<br>time (min) | Peak area<br>(mAU*min) | Peak<br>height<br>(mAU) | Relative<br>peak area<br>(%) | Relative<br>Peak height<br>(%) | Sample<br>volume<br>n.a. |

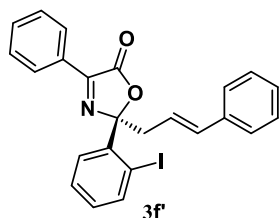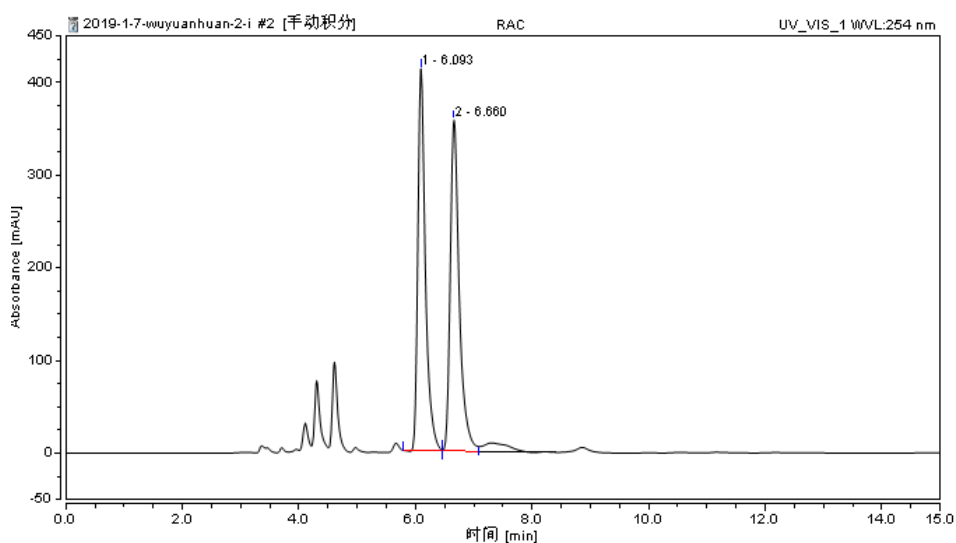

| 序号 | 峰名称 | 保留时间<br>min | 峰面积<br>mAU*min | 峰高<br>mAU | 相对峰面积<br>% | 相对峰高<br>% | 样品量<br>n.a. |
|----|-----|-------------|----------------|-----------|------------|-----------|-------------|
| 1  |     | 6.093       | 61.688         | 412.148   | 49.11      | 53.57     | n.a.        |
| 2  |     | 6.660       | 63.922         | 357.246   | 50.89      | 46.43     | n.a.        |

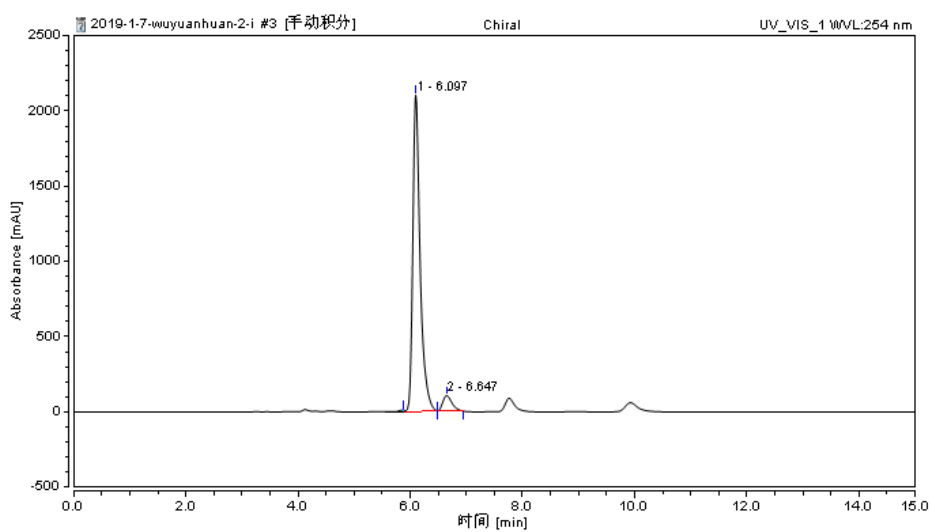

| 序号 | 峰名称 | 保留时间<br>min | 峰面积<br>mAU*min | 峰高<br>mAU | 相对峰面积<br>% | 相对峰高<br>% | 样品量<br>n.a. |
|----|-----|-------------|----------------|-----------|------------|-----------|-------------|
| 1  |     | 6.097       | 317.711        | 2104.474  | 94.00      | 95.27     | n.a.        |
| 2  |     | 6.647       | 20.269         | 104.547   | 6.00       | 4.73      | n.a.        |

For comparison of Chinese and English of the HPLC data table.

| 序号    | 峰名称       | 保留时间 (min)           | 峰面积 (mAU*min)       | 峰高 (mAU)          | 相对峰面积 (%)              | 相对峰高 (%)                 | 样品量 n.a.           |
|-------|-----------|----------------------|---------------------|-------------------|------------------------|--------------------------|--------------------|
| Entry | Peak name | Retention time (min) | Peak area (mAU*min) | Peak height (mAU) | Relative peak area (%) | Relative Peak height (%) | Sample volume n.a. |

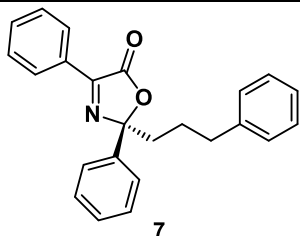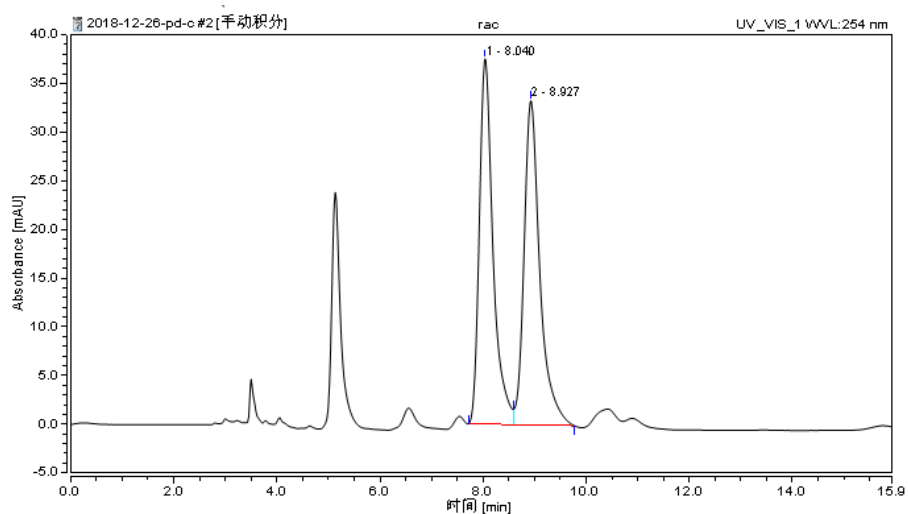

| 序号 | 峰名称 | 保留时间 min | 峰面积 mAU*min | 峰高 mAU | 相对峰面积 % | 相对峰高 % | 样品量 n.a. |
|----|-----|----------|-------------|--------|---------|--------|----------|
| 1  |     | 8.040    | 11.530      | 37.562 | 49.25   | 52.98  | n.a.     |
| 2  |     | 8.927    | 11.880      | 33.340 | 50.75   | 47.02  | n.a.     |

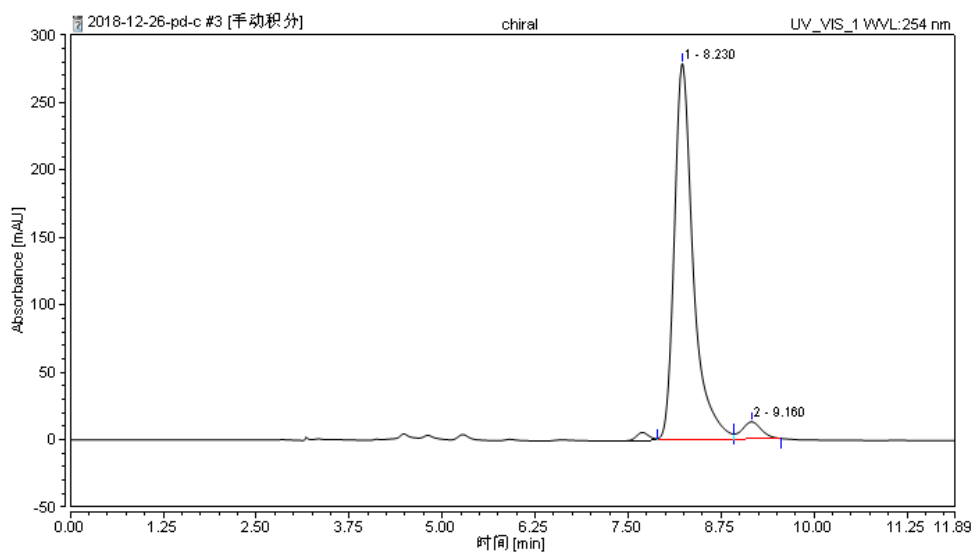

| 序号 | 峰名称 | 保留时间 min | 峰面积 mAU*min | 峰高 mAU  | 相对峰面积 % | 相对峰高 % | 样品量 n.a. |
|----|-----|----------|-------------|---------|---------|--------|----------|
| 1  |     | 8.230    | 82.298      | 279.191 | 95.53   | 95.65  | n.a.     |
| 2  |     | 9.160    | 3.847       | 12.700  | 4.47    | 4.35   | n.a.     |

For comparison of Chinese and English of the HPLC data table.

| 序号    | 峰名称       | 保留时间 (min)           | 峰面积 (mAU*min)       | 峰高 (mAU)          | 相对峰面积 (%)              | 相对峰高 (%)                 | 样品量 n.a.           |
|-------|-----------|----------------------|---------------------|-------------------|------------------------|--------------------------|--------------------|
| Entry | Peak name | Retention time (min) | Peak area (mAU*min) | Peak height (mAU) | Relative peak area (%) | Relative Peak height (%) | Sample volume n.a. |

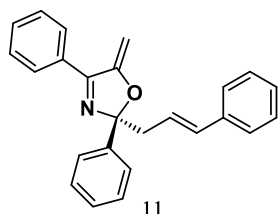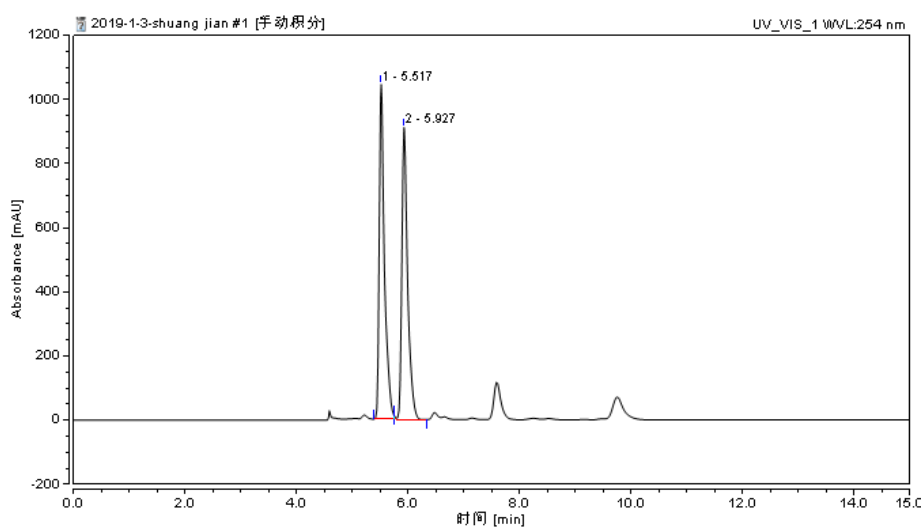

| 序号 | 峰名称 | 保留时间 min | 峰面积 mAU*min | 峰高 mAU   | 相对峰面积 % | 相对峰高 % | 样品量 n.a. |
|----|-----|----------|-------------|----------|---------|--------|----------|
| 1  |     | 5.517    | 113.409     | 1043.819 | 50.99   | 53.41  | n.a.     |
| 2  |     | 5.927    | 109.024     | 910.432  | 49.01   | 46.59  | n.a.     |

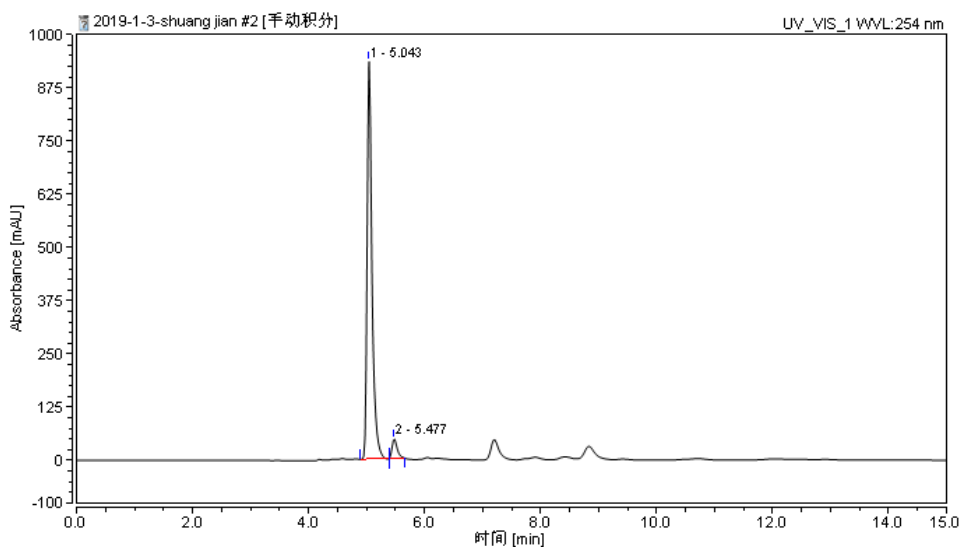

| 序号 | 峰名称 | 保留时间 min | 峰面积 mAU*min | 峰高 mAU  | 相对峰面积 % | 相对峰高 % | 样品量 n.a. |
|----|-----|----------|-------------|---------|---------|--------|----------|
| 1  |     | 5.043    | 90.726      | 933.068 | 95.10   | 95.31  | n.a.     |
| 2  |     | 5.477    | 4.670       | 45.927  | 4.90    | 4.69   | n.a.     |

For comparison of Chinese and English of the HPLC data table.

| 序号    | 峰名称       | 保留时间 (min)           | 峰面积 (mAU*min)       | 峰高 (mAU)          | 相对峰面积 (%)              | 相对峰高 (%)                 | 样品量 n.a.           |
|-------|-----------|----------------------|---------------------|-------------------|------------------------|--------------------------|--------------------|
| Entry | Peak name | Retention time (min) | Peak area (mAU*min) | Peak height (mAU) | Relative peak area (%) | Relative Peak height (%) | Sample volume n.a. |

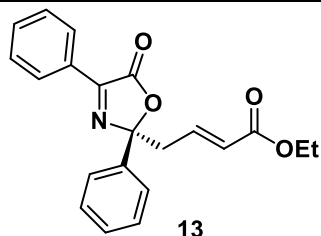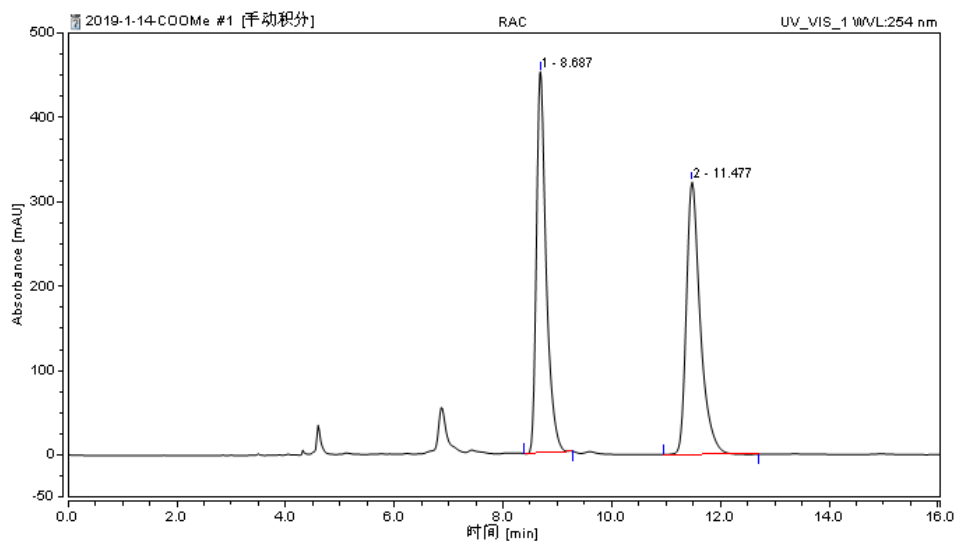

| 序号 | 峰名称 | 保留时间 min | 峰面积 mAU*min | 峰高 mAU  | 相对峰面积 % | 相对峰高 % | 样品量 n.a. |
|----|-----|----------|-------------|---------|---------|--------|----------|
| 1  |     | 8.687    | 93.355      | 452.079 | 49.40   | 58.30  | n.a.     |
| 2  |     | 11.477   | 95.614      | 323.395 | 50.60   | 41.70  | n.a.     |

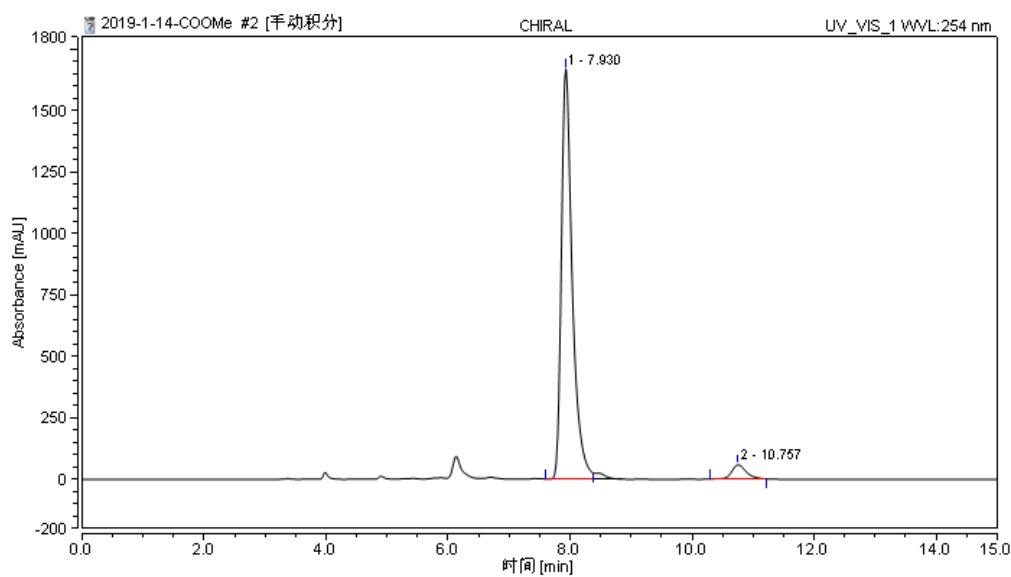

| 序号 | 峰名称 | 保留时间 min | 峰面积 mAU*min | 峰高 mAU   | 相对峰面积 % | 相对峰高 % | 样品量 n.a. |
|----|-----|----------|-------------|----------|---------|--------|----------|
| 1  |     | 7.930    | 344.884     | 1670.097 | 95.53   | 96.64  | n.a.     |
| 2  |     | 10.757   | 16.141      | 58.061   | 4.47    | 3.36   | n.a.     |

For comparison of Chinese and English of the HPLC data table.

| 序号    | 峰名<br>称      | 保留时间<br>(min)           | 峰面<br>积<br>(mAU*min)   | 峰高<br>(mAU)             | 相对峰面<br>积 (%)                | 相对峰高<br>(%)                    | 样品量<br>n.a.              |
|-------|--------------|-------------------------|------------------------|-------------------------|------------------------------|--------------------------------|--------------------------|
| Entry | Peak<br>name | Retention<br>time (min) | Peak area<br>(mAU*min) | Peak<br>height<br>(mAU) | Relative<br>peak area<br>(%) | Relative<br>Peak height<br>(%) | Sample<br>volume<br>n.a. |

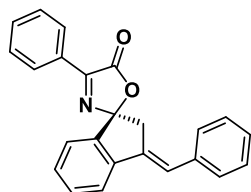

14

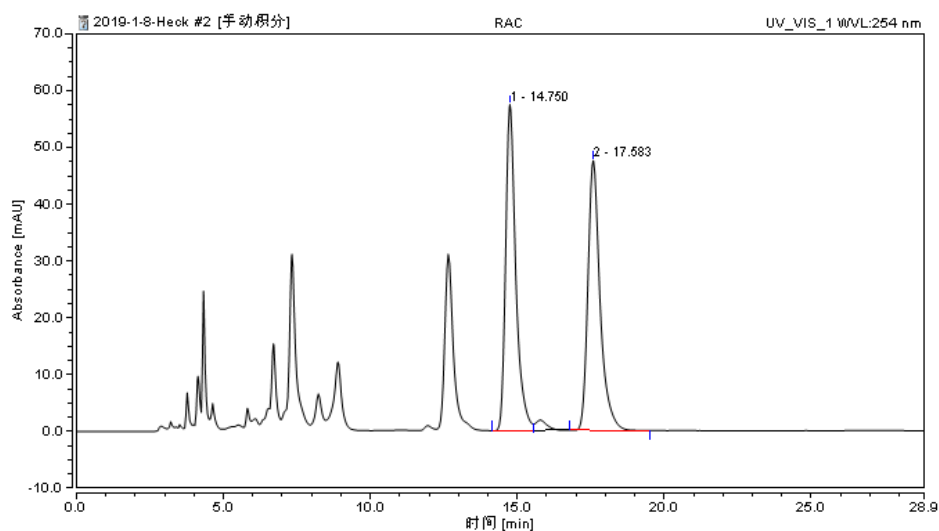

| 序号 | 峰名称 | 保留时间<br>min | 峰面积<br>mAU*min | 峰高<br>mAU | 相对峰面积<br>% | 相对峰高<br>% | 样品量<br>n.a. |
|----|-----|-------------|----------------|-----------|------------|-----------|-------------|
| 1  |     | 14.750      | 22.973         | 57.426    | 50.19      | 54.73     | n.a.        |
| 2  |     | 17.583      | 22.800         | 47.502    | 49.81      | 45.27     | n.a.        |

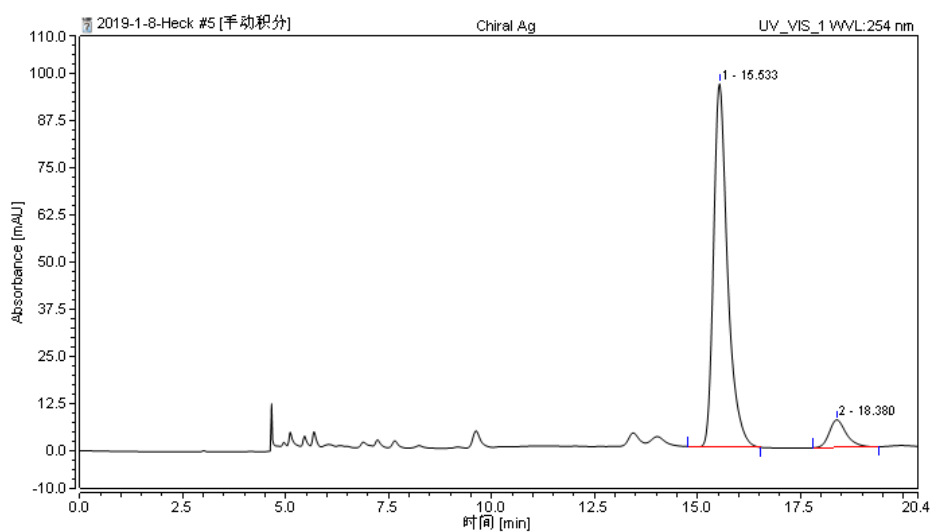

| 号 | 峰名称 | 保留时间<br>min | 峰面积<br>mAU*min | 峰高<br>mAU | 相对峰面积<br>% | 相对峰高<br>% | 样品量<br>n.a. |
|---|-----|-------------|----------------|-----------|------------|-----------|-------------|
|   |     | 15.533      | 37.893         | 96.377    | 91.50      | 92.91     | n.a.        |
|   |     | 18.380      | 3.519          | 7.352     | 8.50       | 7.09      | n.a.        |

For comparison of Chinese and English of the HPLC data table.

| 序号    | 峰名称       | 保留时间 (min)           | 峰面积 (mAU*min)       | 峰高 (mAU)          | 相对峰面积 (%)              | 相对峰高 (%)                 | 样品量 n.a.           |
|-------|-----------|----------------------|---------------------|-------------------|------------------------|--------------------------|--------------------|
| Entry | Peak name | Retention time (min) | Peak area (mAU*min) | Peak height (mAU) | Relative peak area (%) | Relative Peak height (%) | Sample volume n.a. |

one-pot synthesis

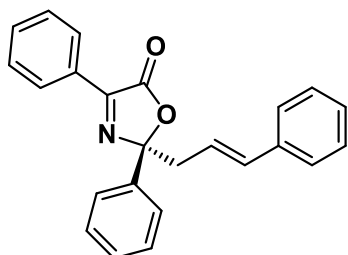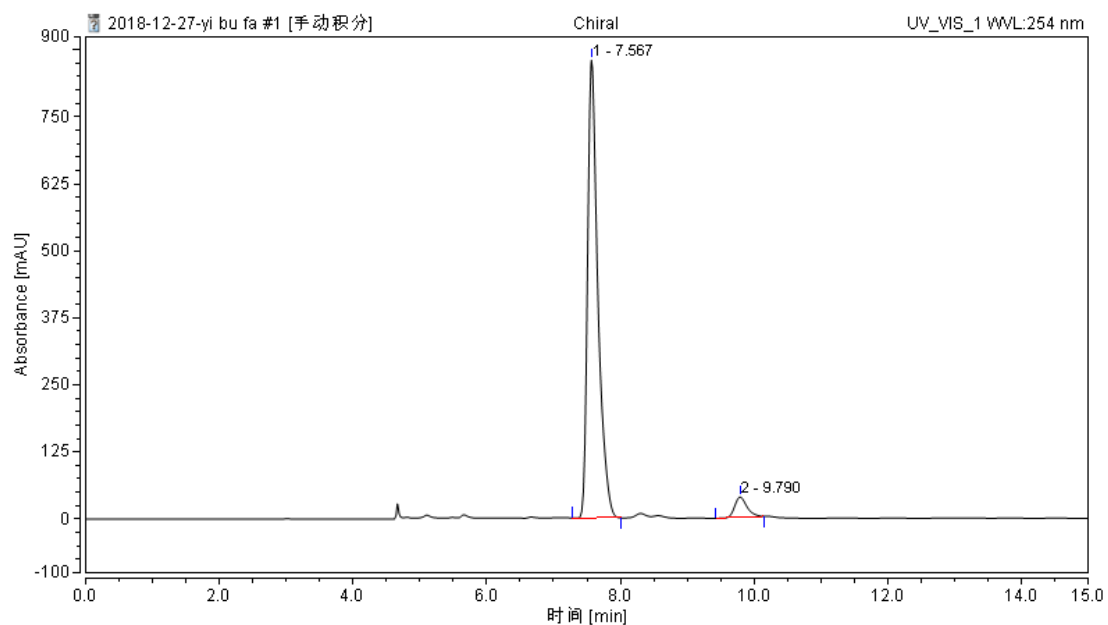

| 序号 | 峰名称 | 保留时间 min | 峰面积 mAU*min | 峰高 mAU  | 相对峰面积 % | 相对峰高 % | 样品量 n.a. |
|----|-----|----------|-------------|---------|---------|--------|----------|
| 1  |     | 7.567    | 152.218     | 853.631 | 95.01   | 95.74  | n.a.     |
| 2  |     | 9.790    | 7.996       | 37.937  | 4.99    | 4.26   | n.a.     |
